# Supplementary material
Source: publisher figshare collection journal article supplement (https://tandf.figshare.com/ndownloader/files/15616124)
Supplement: Supplementary file 1 [file 15616124]

CASRN,Tissue,Duration [d],Test organism,Exposure type,Steady state,RESPONSE,RESPONSE UNIT,Media type,TakenFrom,TITLE,AUTHOR,YEAR,SOURCE,SMILES
100-00-5,WB,5,Oncorhynchus mykiss,FT,Cb/Cw,1.924279286,LogBCF (L/kg bdwt),FW,ArnotGobas,Octanol/Water Partition Coefficients a Bioconcentration Factors of Chloronitrobenzenes in Rainbow Trout (Salmo gairdneri),"Niimi, A.J., H.B. Lee, a G.P. Kissoon",1989,Environ.Toxicol.Chem. 8(9):817-823,[O-][N+](=O)C1=CC=C(Cl)C=C1
100-00-5,WB,56,Cyprinus carpio,FT,Cb/Cw,1.124624205,LogBCF (L/kg bdwt),FW,ArnotGobas,Biodegradation a Bioconcentration of Existing Chemical Substances uer the Chemical Substances Control Law,Chemicals Evaluation a Research Institute,1992,http://qsar.cerij.or.jp/cgi-bin/DEGACC/iex.cgie,[O-][N+](=O)C1=CC=C(Cl)C=C1
100-00-5,WB,56,Cyprinus carpio,FT,Cb/Cw,1.11029982,LogBCF (L/kg bdwt),FW,ArnotGobas,Biodegradation a Bioconcentration of Existing Chemical Substances uer the Chemical Substances Control Law,Chemicals Evaluation a Research Institute,1992,http://qsar.cerij.or.jp/cgi-bin/DEGACC/iex.cgie,[O-][N+](=O)C1=CC=C(Cl)C=C1
100-00-5,WB,3,Poecilia reticulata,Semi-S,Cb/Cw,1.363089987,LogBCF (L/kg bdwt),FW,ArnotGobas,Quantitative Structure-Activity Relationships for the Toxicity a Bioconcentration Factor of Nitrobenzene Derivatives towards the Guppy (Poecilia reticulata).,"Deneer, J.W., T.L. Sinnige, W. Seinen a J.L.M. Hermens",1987,Aquat.Toxicol. 10:115-129,[O-][N+](=O)C1=CC=C(Cl)C=C1
100-00-5,WB,12,Oncorhynchus mykiss,FT,Cb/Cw,2.049218023,LogBCF (L/kg bdwt),FW,ArnotGobas,Octanol/Water Partition Coefficients a Bioconcentration Factors of Chloronitrobenzenes in Rainbow Trout (Salmo gairdneri),"Niimi, A.J., H.B. Lee, a G.P. Kissoon",1989,Environ.Toxicol.Chem. 8(9):817-823,[O-][N+](=O)C1=CC=C(Cl)C=C1
100-00-5,WB,36,Oncorhynchus mykiss,FT,Cb/Cw,2.033423755,LogBCF (L/kg bdwt),FW,ArnotGobas,Octanol/Water Partition Coefficients a Bioconcentration Factors of Chloronitrobenzenes in Rainbow Trout (Salmo gairdneri),"Niimi, A.J., H.B. Lee, a G.P. Kissoon",1989,Environ.Toxicol.Chem. 8(9):817-823,[O-][N+](=O)C1=CC=C(Cl)C=C1
100-00-5,WB,28,Oncorhynchus mykiss,FT,Cb/Cw,2.012837225,LogBCF (L/kg bdwt),FW,ArnotGobas,Octanol/Water Partition Coefficients a Bioconcentration Factors of Chloronitrobenzenes in Rainbow Trout (Salmo gairdneri),"Niimi, A.J., H.B. Lee, a G.P. Kissoon",1989,Environ.Toxicol.Chem. 8(9):817-823,[O-][N+](=O)C1=CC=C(Cl)C=C1
100-00-5,WB,20,Oncorhynchus mykiss,FT,Cb/Cw,1.982271233,LogBCF (L/kg bdwt),FW,ArnotGobas,Octanol/Water Partition Coefficients a Bioconcentration Factors of Chloronitrobenzenes in Rainbow Trout (Salmo gairdneri),"Niimi, A.J., H.B. Lee, a G.P. Kissoon",1989,Environ.Toxicol.Chem. 8(9):817-823,[O-][N+](=O)C1=CC=C(Cl)C=C1
100-02-7,WB,42,Cyprinus carpio,FT,Cb/Cw,0.598829545,LogBCF (L/kg bdwt),FW,ArnotGobas,Biodegradation a Bioconcentration of Existing Chemical Substances uer the Chemical Substances Control Law,Chemicals Evaluation a Research Institute,1992,http://qsar.cerij.or.jp/cgi-bin/DEGACC/iex.cgie,OC1=CC=C(C=C1)[N+]([O-])=O
100-02-7,WB,42,Cyprinus carpio,FT,Cb/Cw,0.710724682,LogBCF (L/kg bdwt),FW,ArnotGobas,Biodegradation a Bioconcentration of Existing Chemical Substances uer the Chemical Substances Control Law,Chemicals Evaluation a Research Institute,1992,http://qsar.cerij.or.jp/cgi-bin/DEGACC/iex.cgie,OC1=CC=C(C=C1)[N+]([O-])=O
100-17-4,WB,42,Cyprinus carpio,FT,Cb/Cw,1.090724682,LogBCF (L/kg bdwt),,ArnotGobas,Biodegradation a Bioconcentration of Existing Chemical Substances uer the Chemical Substances Control Law,Chemicals Evaluation a Research Institute,1992,http://qsar.cerij.or.jp/cgi-bin/DEGACC/iex.cgie,COC1=CC=C(C=C1)[N+]([O-])=O
100-17-4,WB,42,Cyprinus carpio,FT,Cb/Cw,0.28038257,LogBCF (L/kg bdwt),,ArnotGobas,Biodegradation a Bioconcentration of Existing Chemical Substances uer the Chemical Substances Control Law,Chemicals Evaluation a Research Institute,1992,http://qsar.cerij.or.jp/cgi-bin/DEGACC/iex.cgie,COC1=CC=C(C=C1)[N+]([O-])=O
100-25-4,WB,3,Poecilia reticulata,Semi-S,Cb/Cw,-0.396910013,LogBCF (L/kg bdwt),FW,ArnotGobas,Quantitative Structure-Activity Relationships for the Toxicity a Bioconcentration Factor of Nitrobenzene Derivatives towards the Guppy (Poecilia reticulata).,"Deneer, J.W., T.L. Sinnige, W. Seinen a J.L.M. Hermens",1987,Aquat.Toxicol. 10:115-129,[O-][N+](=O)C1=CC=C(C=C1)[N+]([O-])=O
100-26-5,WB,42,Cyprinus carpio,FT,Cb/Cw,0.755700032,LogBCF (L/kg bdwt),,ArnotGobas,Biodegradation a Bioconcentration of Existing Chemical Substances uer the Chemical Substances Control Law,Chemicals Evaluation a Research Institute,1992,http://qsar.cerij.or.jp/cgi-bin/DEGACC/iex.cgie,OC(=O)C1=CC=C(N=C1)C(O)=O
100-26-5,WB,42,Cyprinus carpio,FT,Cb/Cw,-0.224299968,LogBCF (L/kg bdwt),,ArnotGobas,Biodegradation a Bioconcentration of Existing Chemical Substances uer the Chemical Substances Control Law,Chemicals Evaluation a Research Institute,1992,http://qsar.cerij.or.jp/cgi-bin/DEGACC/iex.cgie,OC(=O)C1=CC=C(N=C1)C(O)=O
101-02-0,WB,90,Oncorhynchus mykiss,FT,,2.394451681,LogBCF (L/kg bdwt),FW,ArnotGobas,Phosphate Ester Hydraulic Fluids: An Aquatic Environmental Assessment of Pydrauls 50E a 115E,"Mayer, F.L., W.J. Adams, M.T. Finley, P.R. Michael, P.M. Mehrle, a V.W. Saeger",1981,"In: D.R.Branson a K.L.Dickson (Eds.), Aquatic Toxicology a Hazard Assessment, 4th Conference, ASTM STP 737, Philadelphia, PA:103-123",O(P(OC1=CC=CC=C1)OC1=CC=CC=C1)C1=CC=CC=C1
101-53-1,WB,42,Cyprinus carpio,FT,Cb/Cw,1.448829545,LogBCF (L/kg bdwt),,ArnotGobas,Biodegradation a Bioconcentration of Existing Chemical Substances uer the Chemical Substances Control Law,Chemicals Evaluation a Research Institute,1992,http://qsar.cerij.or.jp/cgi-bin/DEGACC/iex.cgie,OC1=CC=C(CC2=CC=CC=C2)C=C1
101-53-1,WB,42,Cyprinus carpio,FT,Cb/Cw,1.325919453,LogBCF (L/kg bdwt),,ArnotGobas,Biodegradation a Bioconcentration of Existing Chemical Substances uer the Chemical Substances Control Law,Chemicals Evaluation a Research Institute,1992,http://qsar.cerij.or.jp/cgi-bin/DEGACC/iex.cgie,OC1=CC=C(CC2=CC=CC=C2)C=C1
101-84-8,,7,Oncorhynchus mykiss,FT,K1/K2,2.672097858,LogBCF (L/kg bdwt),FW,ArnotGobas,Taint Threshold of Diphenyl Oxide in Rainbow Trout,"Branson, D.R., G.E. Blau, H.C. Alexaer, a T.L. Peters",1979,"In: L.L.Marking a R.A.Kimerle (Eds.), Aquatic Toxicology a Hazard Assessment, 2 Symposium, ASTM STP 667, Philadelphia, PA:107-121",O(C1=CC=CC=C1)C1=CC=CC=C1
101-84-8,WB,56,Cyprinus carpio,FT,Cb/Cw,2.544716211,LogBCF (L/kg bdwt),FW,ArnotGobas,Biodegradation a Bioconcentration of Existing Chemical Substances uer the Chemical Substances Control Law,Chemicals Evaluation a Research Institute,1992,http://qsar.cerij.or.jp/cgi-bin/DEGACC/iex.cgie,O(C1=CC=CC=C1)C1=CC=CC=C1
101-84-8,WB,56,Cyprinus carpio,FT,Cb/Cw,2.503669184,LogBCF (L/kg bdwt),FW,ArnotGobas,Biodegradation a Bioconcentration of Existing Chemical Substances uer the Chemical Substances Control Law,Chemicals Evaluation a Research Institute,1992,http://qsar.cerij.or.jp/cgi-bin/DEGACC/iex.cgie,O(C1=CC=CC=C1)C1=CC=CC=C1
102-70-5,WB,42,Cyprinus carpio,FT,Cb/Cw,0.548829545,LogBCF (L/kg bdwt),,ArnotGobas,Biodegradation a Bioconcentration of Existing Chemical Substances uer the Chemical Substances Control Law,Chemicals Evaluation a Research Institute,1992,http://qsar.cerij.or.jp/cgi-bin/DEGACC/iex.cgie,C=CCN(CC=C)CC=C
102-70-5,WB,42,Cyprinus carpio,FT,Cb/Cw,0.381444085,LogBCF (L/kg bdwt),,ArnotGobas,Biodegradation a Bioconcentration of Existing Chemical Substances uer the Chemical Substances Control Law,Chemicals Evaluation a Research Institute,1992,http://qsar.cerij.or.jp/cgi-bin/DEGACC/iex.cgie,C=CCN(CC=C)CC=C
10315-98-7,WB,42,Cyprinus carpio,FT,Cb/Cw,0.252745925,LogBCF (L/kg bdwt),,ArnotGobas,Biodegradation a Bioconcentration of Existing Chemical Substances uer the Chemical Substances Control Law,Chemicals Evaluation a Research Institute,1992,http://qsar.cerij.or.jp/cgi-bin/DEGACC/iex.cgie,CC(C)CN1CCOCC1
10315-98-7,WB,42,Cyprinus carpio,FT,Cb/Cw,0,LogBCF (L/kg bdwt),,ArnotGobas,Biodegradation a Bioconcentration of Existing Chemical Substances uer the Chemical Substances Control Law,Chemicals Evaluation a Research Institute,1992,http://qsar.cerij.or.jp/cgi-bin/DEGACC/iex.cgie,CC(C)CN1CCOCC1
104-40-5,WB,42,Pimephales promelas,FT,Cb/Cw,2.63748973,LogBCF (L/kg bdwt),FW,ArnotGobas,Bioconcentration of Nonylphenol in Fathead Minnows (Pimephales promelas),"Snyder, S.A., T.L. Keith, S.L. Pierens, E.M. Snyder, a J.P. Giesy",2001,Chemosphere 44(8):1697-1702,CCCCCCCCCC1=CC=C(O)C=C1
104-40-5,WB,42,Pimephales promelas,FT,Cb/Cw,2.428134794,LogBCF (L/kg bdwt),FW,ArnotGobas,Effects of 4-Nonylphenol on Fecuity a Biomarkers of Estrogenicity in Fathead Minnows (Pimephales promelas),"Giesy, J.P., S.L. Pierens, E.M. Snyder, S. Miles-Richardson, V.J. Kramer, S.A. Snyder, K.M. Nichols, a D.A. Villeneuve",2000,Environ.Toxicol.Chem. 19(5):1368-1377,CCCCCCCCCC1=CC=C(O)C=C1
104-40-5,WB,42,Pimephales promelas,FT,Cb/Cw,2.401400541,LogBCF (L/kg bdwt),FW,ArnotGobas,Effects of 4-Nonylphenol on Fecuity a Biomarkers of Estrogenicity in Fathead Minnows (Pimephales promelas),"Giesy, J.P., S.L. Pierens, E.M. Snyder, S. Miles-Richardson, V.J. Kramer, S.A. Snyder, K.M. Nichols, a D.A. Villeneuve",2000,Environ.Toxicol.Chem. 19(5):1368-1377,CCCCCCCCCC1=CC=C(O)C=C1
104-40-5,WB,42,Pimephales promelas,FT,Cb/Cw,2.307496038,LogBCF (L/kg bdwt),FW,ArnotGobas,Effects of 4-Nonylphenol on Fecuity a Biomarkers of Estrogenicity in Fathead Minnows (Pimephales promelas),"Giesy, J.P., S.L. Pierens, E.M. Snyder, S. Miles-Richardson, V.J. Kramer, S.A. Snyder, K.M. Nichols, a D.A. Villeneuve",2000,Environ.Toxicol.Chem. 19(5):1368-1377,CCCCCCCCCC1=CC=C(O)C=C1
104-40-5,WB,42,Pimephales promelas,FT,Cb/Cw,2.580012113,LogBCF (L/kg bdwt),FW,ArnotGobas,Bioconcentration of Nonylphenol in Fathead Minnows (Pimephales promelas),"Snyder, S.A., T.L. Keith, S.L. Pierens, E.M. Snyder, a J.P. Giesy",2001,Chemosphere 44(8):1697-1702,CCCCCCCCCC1=CC=C(O)C=C1
104-40-5,WB,42,Pimephales promelas,FT,Cb/Cw,2.390758529,LogBCF (L/kg bdwt),FW,ArnotGobas,Bioconcentration of Nonylphenol in Fathead Minnows (Pimephales promelas),"Snyder, S.A., T.L. Keith, S.L. Pierens, E.M. Snyder, a J.P. Giesy",2001,Chemosphere 44(8):1697-1702,CCCCCCCCCC1=CC=C(O)C=C1
104-88-1,WB,1,Oryzias latipes,FT,Cb/Cw,0.361727836,LogBCF (L/kg bdwt),FW,ArnotGobas,"Acute Toxicity, Accumulation, a Excretion of Benthiocarb a Its Degradation Products in Killifish","Tsuda, T., M. Kojima, H. Harada, A. Nakajima, a S. Aoki",1997,Bull.Environ.Contam.Toxicol. 58:603-610,ClC1=CC=C(C=O)C=C1
104-88-1,WB,2,Oryzias latipes,FT,Cb/Cw,0.342422681,LogBCF (L/kg bdwt),FW,ArnotGobas,"Acute Toxicity, Accumulation, a Excretion of Benthiocarb a Its Degradation Products in Killifish","Tsuda, T., M. Kojima, H. Harada, A. Nakajima, a S. Aoki",1997,Bull.Environ.Contam.Toxicol. 58:603-610,ClC1=CC=C(C=O)C=C1
104-88-1,WB,4,Oryzias latipes,FT,Cb/Cw,0.255272505,LogBCF (L/kg bdwt),FW,ArnotGobas,"Acute Toxicity, Accumulation, a Excretion of Benthiocarb a Its Degradation Products in Killifish","Tsuda, T., M. Kojima, H. Harada, A. Nakajima, a S. Aoki",1997,Bull.Environ.Contam.Toxicol. 58:603-610,ClC1=CC=C(C=O)C=C1
105-05-5,WB,56,Cyprinus carpio,FT,Cb/Cw,2.683784191,LogBCF (L/kg bdwt),,ArnotGobas,Biodegradation a Bioconcentration of Existing Chemical Substances uer the Chemical Substances Control Law,Chemicals Evaluation a Research Institute,1992,http://qsar.cerij.or.jp/cgi-bin/DEGACC/iex.cgie,CCC1=CC=C(CC)C=C1
105-05-5,WB,56,Cyprinus carpio,FT,Cb/Cw,2.675404867,LogBCF (L/kg bdwt),,ArnotGobas,Biodegradation a Bioconcentration of Existing Chemical Substances uer the Chemical Substances Control Law,Chemicals Evaluation a Research Institute,1992,http://qsar.cerij.or.jp/cgi-bin/DEGACC/iex.cgie,CCC1=CC=C(CC)C=C1
10541-83-0,WB,42,Cyprinus carpio,FT,Cb/Cw,0.38,LogBCF (L/kg bdwt),,ArnotGobas,Biodegradation a Bioconcentration of Existing Chemical Substances uer the Chemical Substances Control Law,Chemicals Evaluation a Research Institute,1992,http://qsar.cerij.or.jp/cgi-bin/DEGACC/iex.cgie,CNC1=CC=C(C=C1)C(O)=O
10541-83-0,WB,42,Cyprinus carpio,FT,Cb/Cw,-0.600740523,LogBCF (L/kg bdwt),,ArnotGobas,Biodegradation a Bioconcentration of Existing Chemical Substances uer the Chemical Substances Control Law,Chemicals Evaluation a Research Institute,1992,http://qsar.cerij.or.jp/cgi-bin/DEGACC/iex.cgie,CNC1=CC=C(C=C1)C(O)=O
106-37-6,WB,4,Gambusia affinis,R,K1/K2,2.342422681,LogBCF (L/kg bdwt),FW,ArnotGobas,Bioconcentration of Bromo- a Chlorobenzenes by Fish (Gambusia affinis),"Chaisuksant, Y., Q. Yu, a D.W. Connel",1997,Water Res. 31(1):61-68,BrC1=CC=C(Br)C=C1
106-37-6,WB,56,Cyprinus carpio,FT,Cb/Cw,2.25392618,LogBCF (L/kg bdwt),FW,ArnotGobas,Biodegradation a Bioconcentration of Existing Chemical Substances uer the Chemical Substances Control Law,Chemicals Evaluation a Research Institute,1992,http://qsar.cerij.or.jp/cgi-bin/DEGACC/iex.cgie,BrC1=CC=C(Br)C=C1
106-37-6,WB,56,Cyprinus carpio,FT,Cb/Cw,2.212862038,LogBCF (L/kg bdwt),FW,ArnotGobas,Biodegradation a Bioconcentration of Existing Chemical Substances uer the Chemical Substances Control Law,Chemicals Evaluation a Research Institute,1992,http://qsar.cerij.or.jp/cgi-bin/DEGACC/iex.cgie,BrC1=CC=C(Br)C=C1
106-37-6,WB,12,Poecilia reticulata,FT,K1/K2,1.959041392,LogBCF (L/kg bdwt),FW,ArnotGobas,Bioconcentration of Polybrominated Benzenes a Biphenyls a Related Superhydrophobic Chemicals in Fish: Role of Bioavailability a Elimination into the Feces.,"Gobas, F.A.P.C., K.E. Clark, W.Y. Shiu a D. Mackay",1989,Environ. Toxicol. Chem 8:231-245,BrC1=CC=C(Br)C=C1
106-41-2,WB,42,Cyprinus carpio,FT,Cb/Cw,1.174716211,LogBCF (L/kg bdwt),,ArnotGobas,Biodegradation a Bioconcentration of Existing Chemical Substances uer the Chemical Substances Control Law,Chemicals Evaluation a Research Institute,1992,http://qsar.cerij.or.jp/cgi-bin/DEGACC/iex.cgie,OC1=CC=C(Br)C=C1
106-41-2,WB,42,Cyprinus carpio,FT,Cb/Cw,0.999259477,LogBCF (L/kg bdwt),,ArnotGobas,Biodegradation a Bioconcentration of Existing Chemical Substances uer the Chemical Substances Control Law,Chemicals Evaluation a Research Institute,1992,http://qsar.cerij.or.jp/cgi-bin/DEGACC/iex.cgie,OC1=CC=C(Br)C=C1
106-43-4,WB,56,Cyprinus carpio,FT,Cb/Cw,1.765126931,LogBCF (L/kg bdwt),,ArnotGobas,Biodegradation a Bioconcentration of Existing Chemical Substances uer the Chemical Substances Control Law,Chemicals Evaluation a Research Institute,1992,http://qsar.cerij.or.jp/cgi-bin/DEGACC/iex.cgie,CC1=CC=C(Cl)C=C1
106-43-4,WB,56,Cyprinus carpio,FT,Cb/Cw,1.689021782,LogBCF (L/kg bdwt),,ArnotGobas,Biodegradation a Bioconcentration of Existing Chemical Substances uer the Chemical Substances Control Law,Chemicals Evaluation a Research Institute,1992,http://qsar.cerij.or.jp/cgi-bin/DEGACC/iex.cgie,CC1=CC=C(Cl)C=C1
106-46-7,WB,63,Oncorhynchus mykiss,FT,Cb/Cw,2.792391689,LogBCF (L/kg bdwt),FW,ArnotGobas,Bioconcentration of Chlorobenzenes from Water by Rainbow Trout: Correlations with Partition Coefficients a Environmental Residues,"Oliver, B.G. a A.J. Niimi",1983,Environ.Sci.Technol. 17:287-291,ClC1=CC=C(Cl)C=C1
106-46-7,WB,4,Gambusia affinis,R,K1/K2,1.892094603,LogBCF (L/kg bdwt),FW,ArnotGobas,Bioconcentration of Bromo- a Chlorobenzenes by Fish (Gambusia affinis),"Chaisuksant, Y., Q. Yu, a D.W. Connel",1997,Water Res. 31(1):61-68,ClC1=CC=C(Cl)C=C1
106-46-7,WB,7,Oncorhynchus mykiss,FT,Cb/Cw,2.832508913,LogBCF (L/kg bdwt),FW,ArnotGobas,Bioconcentration of Chlorobenzenes from Water by Rainbow Trout: Correlations with Partition Coefficients a Environmental Residues,"Oliver, B.G. a A.J. Niimi",1983,Environ.Sci.Technol. 17:287-291,ClC1=CC=C(Cl)C=C1
106-46-7,WB,43,Oncorhynchus mykiss,FT,Cb/Cw,2.959041392,LogBCF (L/kg bdwt),FW,ArnotGobas,Bioconcentration of Chlorobenzenes from Water by Rainbow Trout: Correlations with Partition Coefficients a Environmental Residues,"Oliver, B.G. a A.J. Niimi",1983,Environ.Sci.Technol. 17:287-291,ClC1=CC=C(Cl)C=C1
106-46-7,WB,22,Oncorhynchus mykiss,FT,Cb/Cw,2.785329835,LogBCF (L/kg bdwt),FW,ArnotGobas,Bioconcentration of Chlorobenzenes from Water by Rainbow Trout: Correlations with Partition Coefficients a Environmental Residues,"Oliver, B.G. a A.J. Niimi",1983,Environ.Sci.Technol. 17:287-291,ClC1=CC=C(Cl)C=C1
106-46-7,WB,105,Oncorhynchus mykiss,FT,Cb/Cw,2.903089987,LogBCF (L/kg bdwt),FW,ArnotGobas,Bioconcentration of Chlorobenzenes from Water by Rainbow Trout: Correlations with Partition Coefficients a Environmental Residues,"Oliver, B.G. a A.J. Niimi",1983,Environ.Sci.Technol. 17:287-291,ClC1=CC=C(Cl)C=C1
106-46-7,WB,39,Oncorhynchus mykiss,FT,Cb/Cw,2.69019608,LogBCF (L/kg bdwt),FW,ArnotGobas,Bioconcentration of Chlorobenzenes from Water by Rainbow Trout: Correlations with Partition Coefficients a Environmental Residues,"Oliver, B.G. a A.J. Niimi",1983,Environ.Sci.Technol. 17:287-291,ClC1=CC=C(Cl)C=C1
106-46-7,WB,69,Oncorhynchus mykiss,FT,Cb/Cw,2.591064607,LogBCF (L/kg bdwt),FW,ArnotGobas,Bioconcentration of Chlorobenzenes from Water by Rainbow Trout: Correlations with Partition Coefficients a Environmental Residues,"Oliver, B.G. a A.J. Niimi",1983,Environ.Sci.Technol. 17:287-291,ClC1=CC=C(Cl)C=C1
106-46-7,WB,119,Oncorhynchus mykiss,FT,Cb/Cw,2.556302501,LogBCF (L/kg bdwt),FW,ArnotGobas,Bioconcentration of Chlorobenzenes from Water by Rainbow Trout: Correlations with Partition Coefficients a Environmental Residues,"Oliver, B.G. a A.J. Niimi",1983,Environ.Sci.Technol. 17:287-291,ClC1=CC=C(Cl)C=C1
106-46-7,WB,8,Oncorhynchus mykiss,FT,Cb/Cw,2.531478917,LogBCF (L/kg bdwt),FW,ArnotGobas,Bioconcentration of Chlorobenzenes from Water by Rainbow Trout: Correlations with Partition Coefficients a Environmental Residues,"Oliver, B.G. a A.J. Niimi",1983,Environ.Sci.Technol. 17:287-291,ClC1=CC=C(Cl)C=C1
106-46-7,WB,99,Oncorhynchus mykiss,FT,Cb/Cw,2.477121255,LogBCF (L/kg bdwt),FW,ArnotGobas,Bioconcentration of Chlorobenzenes from Water by Rainbow Trout: Correlations with Partition Coefficients a Environmental Residues,"Oliver, B.G. a A.J. Niimi",1983,Environ.Sci.Technol. 17:287-291,ClC1=CC=C(Cl)C=C1
106-46-7,WB,7,Oncorhynchus mykiss,FT,Cb/Cw,2.913813852,LogBCF (L/kg bdwt),FW,ArnotGobas,Bioconcentration Factors of Some Halogenated Organics for Rainbow Trout: Limitations in Their Use for Prediction of Environmental Residues,"Oliver, B.G., a A.J. Niimi",1985,Environ.Sci.Technol. 19(9):842-849,ClC1=CC=C(Cl)C=C1
106-46-7,WB,21,Oncorhynchus mykiss,FT,Cb/Cw,2.934498451,LogBCF (L/kg bdwt),FW,ArnotGobas,Bioconcentration Factors of Some Halogenated Organics for Rainbow Trout: Limitations in Their Use for Prediction of Environmental Residues,"Oliver, B.G., a A.J. Niimi",1985,Environ.Sci.Technol. 19(9):842-849,ClC1=CC=C(Cl)C=C1
106-46-7,WB,21,Oncorhynchus mykiss,FT,Cb/Cw,2.591064607,LogBCF (L/kg bdwt),FW,ArnotGobas,Bioconcentration Factors of Some Halogenated Organics for Rainbow Trout: Limitations in Their Use for Prediction of Environmental Residues,"Oliver, B.G., a A.J. Niimi",1985,Environ.Sci.Technol. 19(9):842-849,ClC1=CC=C(Cl)C=C1
106-46-7,WB,50,Oncorhynchus mykiss,FT,Cb/Cw,3.041392685,LogBCF (L/kg bdwt),FW,ArnotGobas,Bioconcentration Factors of Some Halogenated Organics for Rainbow Trout: Limitations in Their Use for Prediction of Environmental Residues,"Oliver, B.G., a A.J. Niimi",1985,Environ.Sci.Technol. 19(9):842-849,ClC1=CC=C(Cl)C=C1
106-46-7,WB,35,Oncorhynchus mykiss,FT,Cb/Cw,3,LogBCF (L/kg bdwt),FW,ArnotGobas,Bioconcentration Factors of Some Halogenated Organics for Rainbow Trout: Limitations in Their Use for Prediction of Environmental Residues,"Oliver, B.G., a A.J. Niimi",1985,Environ.Sci.Technol. 19(9):842-849,ClC1=CC=C(Cl)C=C1
106-46-7,WB,35,Oncorhynchus mykiss,FT,Cb/Cw,3.146128036,LogBCF (L/kg bdwt),FW,ArnotGobas,Bioconcentration Factors of Some Halogenated Organics for Rainbow Trout: Limitations in Their Use for Prediction of Environmental Residues,"Oliver, B.G., a A.J. Niimi",1985,Environ.Sci.Technol. 19(9):842-849,ClC1=CC=C(Cl)C=C1
106-46-7,WB,7,Oncorhynchus mykiss,FT,Cb/Cw,2.707570176,LogBCF (L/kg bdwt),FW,ArnotGobas,Bioconcentration Factors of Some Halogenated Organics for Rainbow Trout: Limitations in Their Use for Prediction of Environmental Residues,"Oliver, B.G., a A.J. Niimi",1985,Environ.Sci.Technol. 19(9):842-849,ClC1=CC=C(Cl)C=C1
106-46-7,WB,75,Oncorhynchus mykiss,FT,Cb/Cw,2.770852012,LogBCF (L/kg bdwt),FW,ArnotGobas,Bioconcentration Factors of Some Halogenated Organics for Rainbow Trout: Limitations in Their Use for Prediction of Environmental Residues,"Oliver, B.G., a A.J. Niimi",1985,Environ.Sci.Technol. 19(9):842-849,ClC1=CC=C(Cl)C=C1
106-46-7,WB,50,Oncorhynchus mykiss,FT,Cb/Cw,2.72427587,LogBCF (L/kg bdwt),FW,ArnotGobas,Bioconcentration Factors of Some Halogenated Organics for Rainbow Trout: Limitations in Their Use for Prediction of Environmental Residues,"Oliver, B.G., a A.J. Niimi",1985,Environ.Sci.Technol. 19(9):842-849,ClC1=CC=C(Cl)C=C1
106-46-7,WB,96,Oncorhynchus mykiss,FT,Cb/Cw,2.740362689,LogBCF (L/kg bdwt),FW,ArnotGobas,Bioconcentration Factors of Some Halogenated Organics for Rainbow Trout: Limitations in Their Use for Prediction of Environmental Residues,"Oliver, B.G., a A.J. Niimi",1985,Environ.Sci.Technol. 19(9):842-849,ClC1=CC=C(Cl)C=C1
106-46-7,WB,96,Oncorhynchus mykiss,FT,Cb/Cw,2.633468456,LogBCF (L/kg bdwt),FW,ArnotGobas,Bioconcentration Factors of Some Halogenated Organics for Rainbow Trout: Limitations in Their Use for Prediction of Environmental Residues,"Oliver, B.G., a A.J. Niimi",1985,Environ.Sci.Technol. 19(9):842-849,ClC1=CC=C(Cl)C=C1
106-46-7,WB,75,Oncorhynchus mykiss,FT,Cb/Cw,2.342422681,LogBCF (L/kg bdwt),FW,ArnotGobas,Bioconcentration Factors of Some Halogenated Organics for Rainbow Trout: Limitations in Their Use for Prediction of Environmental Residues,"Oliver, B.G., a A.J. Niimi",1985,Environ.Sci.Technol. 19(9):842-849,ClC1=CC=C(Cl)C=C1
106-46-7,WB,28,Jordanella floridae,FT,BIOFAC,2.471291711,LogBCF (L/kg bdwt),FW,ArnotGobas,"Bioconcentration Kinetics of Some Chlorinated Benzenes a Chlorinated Phenols in American Flagfish, Jordanella floridae (Goode a Bean)","Smith, A.D., A. Bharath, C. Mallard, D. Orr, L.S. McCarty, a G.W. Ozburn",1990,Chemosphere 20(3-4):379-386,ClC1=CC=C(Cl)C=C1
106-47-8,WB,1,Poecilia reticulata,FT,Cb/Cw,1.127104798,LogBCF (L/kg bdwt),FW,ArnotGobas,"Kinetics of 4-Chloroaniline in Guppy, Poecilia reticulata","de Wolf, W., B. Mast, E.S.E. Yedema, W. Seinen, a J.L.M. Hermens",1994,Aquat.Toxicol. 28(1/2):65-78,NC1=CC=C(Cl)C=C1
106-47-8,,14,Cyprinus carpio,FT,Cb/Cw,0.23,LogBCF (L/kg bdwt),FW,ArnotGobas,Accumulation a Excretion of Chloroanilines by Carp,"Tsuda, T., S. Aoki, M. Kojima a T. Fujita",1993,Chemosphere 26:2301-2306,NC1=CC=C(Cl)C=C1
106-47-8,,14,Cyprinus carpio,FT,Cb/Cw,-0.1,LogBCF (L/kg bdwt),FW,ArnotGobas,Accumulation a Excretion of Chloroanilines by Carp,"Tsuda, T., S. Aoki, M. Kojima a T. Fujita",1993,Chemosphere 26:2301-2306,NC1=CC=C(Cl)C=C1
106-47-8,WB,0.08,Oryzias latipes,FT,K1/K2,0.824413441,LogBCF (L/kg bdwt),FW,ArnotGobas,Toxicokinetics a Metabolism of Aniline a 4-Chloroaniline in Medaka (Oryzias latipes),"Bradbury, S.P., J.M. Dady, P.N. Fitzsimmons, M.M. Voit, D.E. Hammermeister, a R.J. Erickson",1993,Toxicol.Appl.Pharmacol. 118(2):205-214,NC1=CC=C(Cl)C=C1
108-36-1,WB,90,Oncorhynchus mykiss,FT,Cb/Cw,2.82,LogBCF (L/kg bdwt),FW,ArnotGobas,The Relationship Between Bioconcentration Factor in Rainbow Trout a Physical-Chemical Properties for some Halogenated Compous.,"Oliver, B.G.",1984,In: QSAR in Environmental Toxicology :300-317,BrC1=CC(Br)=CC=C1
108-42-9,,14,Cyprinus carpio,FT,Cb/Cw,-0.1,LogBCF (L/kg bdwt),FW,ArnotGobas,Accumulation a Excretion of Chloroanilines by Carp,"Tsuda, T., S. Aoki, M. Kojima a T. Fujita",1993,Chemosphere 26:2301-2306,NC1=CC=CC(Cl)=C1
108-42-9,,14,Cyprinus carpio,FT,Cb/Cw,0.34,LogBCF (L/kg bdwt),FW,ArnotGobas,Accumulation a Excretion of Chloroanilines by Carp,"Tsuda, T., S. Aoki, M. Kojima a T. Fujita",1993,Chemosphere 26:2301-2306,NC1=CC=CC(Cl)=C1
108-60-1,WB,42,Cyprinus carpio,FT,Cb/Cw,0.965652856,LogBCF (L/kg bdwt),,ArnotGobas,Biodegradation a Bioconcentration of Existing Chemical Substances uer the Chemical Substances Control Law,Chemicals Evaluation a Research Institute,1992,http://qsar.cerij.or.jp/cgi-bin/DEGACC/iex.cgie,CC(CCl)OC(C)CCl
108-60-1,WB,42,Cyprinus carpio,FT,Cb/Cw,0.850051168,LogBCF (L/kg bdwt),,ArnotGobas,Biodegradation a Bioconcentration of Existing Chemical Substances uer the Chemical Substances Control Law,Chemicals Evaluation a Research Institute,1992,http://qsar.cerij.or.jp/cgi-bin/DEGACC/iex.cgie,CC(CCl)OC(C)CCl
108-70-3,WB,63,Oncorhynchus mykiss,FT,Cb/Cw,3.924279286,LogBCF (L/kg bdwt),FW,ArnotGobas,Bioconcentration of Chlorobenzenes from Water by Rainbow Trout: Correlations with Partition Coefficients a Environmental Residues,"Oliver, B.G. a A.J. Niimi",1983,Environ.Sci.Technol. 17:287-291,ClC1=CC(Cl)=CC(Cl)=C1
108-70-3,WB,42,Cyprinus carpio,FT,Cb/Cw,3.049218023,LogBCF (L/kg bdwt),,ArnotGobas,Biodegradation a Bioconcentration of Existing Chemical Substances uer the Chemical Substances Control Law,Chemicals Evaluation a Research Institute,1992,http://qsar.cerij.or.jp/cgi-bin/DEGACC/iex.cgie,ClC1=CC(Cl)=CC(Cl)=C1
108-70-3,WB,42,Cyprinus carpio,FT,Cb/Cw,2.966141733,LogBCF (L/kg bdwt),,ArnotGobas,Biodegradation a Bioconcentration of Existing Chemical Substances uer the Chemical Substances Control Law,Chemicals Evaluation a Research Institute,1992,http://qsar.cerij.or.jp/cgi-bin/DEGACC/iex.cgie,ClC1=CC(Cl)=CC(Cl)=C1
108-70-3,WB,22,Oncorhynchus mykiss,FT,Cb/Cw,3.579783597,LogBCF (L/kg bdwt),FW,ArnotGobas,Bioconcentration of Chlorobenzenes from Water by Rainbow Trout: Correlations with Partition Coefficients a Environmental Residues,"Oliver, B.G. a A.J. Niimi",1983,Environ.Sci.Technol. 17:287-291,ClC1=CC(Cl)=CC(Cl)=C1
108-70-3,WB,43,Oncorhynchus mykiss,FT,Cb/Cw,3.707570176,LogBCF (L/kg bdwt),FW,ArnotGobas,Bioconcentration of Chlorobenzenes from Water by Rainbow Trout: Correlations with Partition Coefficients a Environmental Residues,"Oliver, B.G. a A.J. Niimi",1983,Environ.Sci.Technol. 17:287-291,ClC1=CC(Cl)=CC(Cl)=C1
108-70-3,WB,105,Oncorhynchus mykiss,FT,Cb/Cw,3.643452676,LogBCF (L/kg bdwt),FW,ArnotGobas,Bioconcentration of Chlorobenzenes from Water by Rainbow Trout: Correlations with Partition Coefficients a Environmental Residues,"Oliver, B.G. a A.J. Niimi",1983,Environ.Sci.Technol. 17:287-291,ClC1=CC(Cl)=CC(Cl)=C1
108-70-3,WB,119,Oncorhynchus mykiss,FT,Cb/Cw,3.301029996,LogBCF (L/kg bdwt),FW,ArnotGobas,Bioconcentration of Chlorobenzenes from Water by Rainbow Trout: Correlations with Partition Coefficients a Environmental Residues,"Oliver, B.G. a A.J. Niimi",1983,Environ.Sci.Technol. 17:287-291,ClC1=CC(Cl)=CC(Cl)=C1
108-70-3,WB,69,Oncorhynchus mykiss,FT,Cb/Cw,3.278753601,LogBCF (L/kg bdwt),FW,ArnotGobas,Bioconcentration of Chlorobenzenes from Water by Rainbow Trout: Correlations with Partition Coefficients a Environmental Residues,"Oliver, B.G. a A.J. Niimi",1983,Environ.Sci.Technol. 17:287-291,ClC1=CC(Cl)=CC(Cl)=C1
108-70-3,WB,39,Oncorhynchus mykiss,FT,Cb/Cw,3.255272505,LogBCF (L/kg bdwt),FW,ArnotGobas,Bioconcentration of Chlorobenzenes from Water by Rainbow Trout: Correlations with Partition Coefficients a Environmental Residues,"Oliver, B.G. a A.J. Niimi",1983,Environ.Sci.Technol. 17:287-291,ClC1=CC(Cl)=CC(Cl)=C1
108-70-3,WB,99,Oncorhynchus mykiss,FT,Cb/Cw,3.230448921,LogBCF (L/kg bdwt),FW,ArnotGobas,Bioconcentration of Chlorobenzenes from Water by Rainbow Trout: Correlations with Partition Coefficients a Environmental Residues,"Oliver, B.G. a A.J. Niimi",1983,Environ.Sci.Technol. 17:287-291,ClC1=CC(Cl)=CC(Cl)=C1
108-70-3,WB,2,Poecilia reticulata,FT,Cb/Cw,3.078964045,LogBCF (L/kg bdwt),FW,ArnotGobas,Thermodynamics of Fish/Water a Octanol/Water Partitioning of some Chlorinated Benzenes,"Opperhuizen, A., P. Serne a J.M.D. van der Steen",1988,Environ. Sci Technol. 22:286-292,ClC1=CC(Cl)=CC(Cl)=C1
108-70-3,WB,2,Poecilia reticulata,FT,Cb/Cw,3.048965904,LogBCF (L/kg bdwt),FW,ArnotGobas,Thermodynamics of Fish/Water a Octanol/Water Partitioning of some Chlorinated Benzenes,"Opperhuizen, A., P. Serne a J.M.D. van der Steen",1988,Environ. Sci Technol. 22:286-292,ClC1=CC(Cl)=CC(Cl)=C1
108-70-3,WB,2,Poecilia reticulata,FT,Cb/Cw,3.018970809,LogBCF (L/kg bdwt),FW,ArnotGobas,Thermodynamics of Fish/Water a Octanol/Water Partitioning of some Chlorinated Benzenes,"Opperhuizen, A., P. Serne a J.M.D. van der Steen",1988,Environ. Sci Technol. 22:286-292,ClC1=CC(Cl)=CC(Cl)=C1
108-70-3,WB,12,Poecilia reticulata,,Cb/Cw,3.480006943,LogBCF (L/kg bdwt),FW,ArnotGobas,Relationship Between Bioavailability a Hydrophobicity: Reduction of the Uptake of Organicchemicals by Fish Due to the Sorption on Particles.,"Schrap, S.M. a A. Opperhuizen",1990,Environ. Toxicol. Chem. 9:715-724,ClC1=CC(Cl)=CC(Cl)=C1
108-70-3,WB,12,Poecilia reticulata,,Cb/Cw,3.449940989,LogBCF (L/kg bdwt),FW,ArnotGobas,Relationship Between Bioavailability a Hydrophobicity: Reduction of the Uptake of Organicchemicals by Fish Due to the Sorption on Particles.,"Schrap, S.M. a A. Opperhuizen",1990,Environ. Toxicol. Chem. 9:715-724,ClC1=CC(Cl)=CC(Cl)=C1
108-88-3,WB,,Carassius auratus,,Cb/Cw,0.92,LogBCF (L/kg bdwt),,ArnotGobas,Partition Coefficients as a Measure of Bioconcentration Potential of Crude Oil Compous in Fish a Shellfish,"Ogata, M., K. Fujisawa, Y. Ogino a E. Mano",1984,Bull. Environ. Contam. Toxicol. 33:561-567,CC1=CC=CC=C1
108-90-7,WB,56,Cyprinus carpio,FT,Cb/Cw,1.127090667,LogBCF (L/kg bdwt),FW,ArnotGobas,Biodegradation a Bioconcentration of Existing Chemical Substances uer the Chemical Substances Control Law,Chemicals Evaluation a Research Institute,1992,http://qsar.cerij.or.jp/cgi-bin/DEGACC/iex.cgie,ClC1=CC=CC=C1
108-90-7,WB,56,Cyprinus carpio,FT,Cb/Cw,1.343177226,LogBCF (L/kg bdwt),FW,ArnotGobas,Biodegradation a Bioconcentration of Existing Chemical Substances uer the Chemical Substances Control Law,Chemicals Evaluation a Research Institute,1992,http://qsar.cerij.or.jp/cgi-bin/DEGACC/iex.cgie,ClC1=CC=CC=C1
108-95-2,WB,,Brachydanio rerio,FT,K1/K2,1.24,LogBCF (L/kg bdwt),FW,ArnotGobas,Bioaccumulation of Phenols in Zebrafish Determined by a Dynamic Flow Through Test,"Butte, W., Willing, A., Zauke, G.-P.",1987,"QSAR in Environmental Toxicology II pp.43-53 (K.L.E. Kaiser, Ed)",OC1=CC=CC=C1
109-09-1,WB,42,Cyprinus carpio,FT,Cb/Cw,1.28,LogBCF (L/kg bdwt),,ArnotGobas,Biodegradation a Bioconcentration of Existing Chemical Substances uer the Chemical Substances Control Law,Chemicals Evaluation a Research Institute,1992,http://qsar.cerij.or.jp/cgi-bin/DEGACC/iex.cgie,ClC1=CC=CC=N1
109-09-1,WB,42,Cyprinus carpio,FT,Cb/Cw,0.28,LogBCF (L/kg bdwt),,ArnotGobas,Biodegradation a Bioconcentration of Existing Chemical Substances uer the Chemical Substances Control Law,Chemicals Evaluation a Research Institute,1992,http://qsar.cerij.or.jp/cgi-bin/DEGACC/iex.cgie,ClC1=CC=CC=N1
111-44-4,WB,42,Cyprinus carpio,FT,Cb/Cw,1,LogBCF (L/kg bdwt),,ArnotGobas,Biodegradation a Bioconcentration of Existing Chemical Substances uer the Chemical Substances Control Law,Chemicals Evaluation a Research Institute,1992,http://qsar.cerij.or.jp/cgi-bin/DEGACC/iex.cgie,ClCCOCCCl
111-44-4,WB,42,Cyprinus carpio,FT,Cb/Cw,-0.071698948,LogBCF (L/kg bdwt),,ArnotGobas,Biodegradation a Bioconcentration of Existing Chemical Substances uer the Chemical Substances Control Law,Chemicals Evaluation a Research Institute,1992,http://qsar.cerij.or.jp/cgi-bin/DEGACC/iex.cgie,ClCCOCCCl
112-40-3,WB,13,Pimephales promelas,FT,Cb/Cw,2.380211242,LogBCF (L/kg bdwt),FW,ArnotGobas,"Bioconcentration of n-dodecane a its highly branched isomer 2,2,4,6,6-pentamethylheptane in Fathead minnows.","Tolls, J. a J. van Dijk",2002,Chemosphere 47: 1049-1057,CCCCCCCCCCCC
114012-04-3,WB,7.01,Poecilia reticulata,FT,Cb/Cw,2.333648757,LogBCF (L/kg bdwt),FW,ArnotGobas,Uptake a Elimination Kinetics of Organophosphorous Pesticides in the Guppy (Poecilia reticulata): Correlations with the Octanol/Water Partition,"De Bruijn, J., a J. Hermens",1991,Environ.Toxicol.Chem. 10(6):791-804,COP(=S)(OC)OC1=C(Cl)C=CC=C1C#N
1141-38-4,WB,42,Cyprinus carpio,FT,Cb/Cw,0.813265519,LogBCF (L/kg bdwt),,ArnotGobas,Biodegradation a Bioconcentration of Existing Chemical Substances uer the Chemical Substances Control Law,Chemicals Evaluation a Research Institute,1992,http://qsar.cerij.or.jp/cgi-bin/DEGACC/iex.cgie,OC(=O)C1=CC2=CC=C(C=C2C=C1)C(O)=O
1141-38-4,WB,42,Cyprinus carpio,FT,Cb/Cw,-0.22,LogBCF (L/kg bdwt),,ArnotGobas,Biodegradation a Bioconcentration of Existing Chemical Substances uer the Chemical Substances Control Law,Chemicals Evaluation a Research Institute,1992,http://qsar.cerij.or.jp/cgi-bin/DEGACC/iex.cgie,OC(=O)C1=CC2=CC=C(C=C2C=C1)C(O)=O
115-32-2,WB,60,Cyprinus carpio,FT,Cb/Cw,3.908485019,LogBCF (L/kg bdwt),,ArnotGobas,Biodegradation a Bioconcentration of Existing Chemical Substances uer the Chemical Substances Control Law,National Institute of Technology a Evaluation,2005,http://www.nite.go.jp/iex-e.html,OC(C1=CC=C(Cl)C=C1)(C1=CC=C(Cl)C=C1)C(Cl)(Cl)Cl
115-32-2,WB,60,Cyprinus carpio,FT,Cb/Cw,3.785329835,LogBCF (L/kg bdwt),,ArnotGobas,Biodegradation a Bioconcentration of Existing Chemical Substances uer the Chemical Substances Control Law,National Institute of Technology a Evaluation,2005,http://www.nite.go.jp/iex-e.html,OC(C1=CC=C(Cl)C=C1)(C1=CC=C(Cl)C=C1)C(Cl)(Cl)Cl
115-86-6,WB,3,Oryzias latipes,S,Cb/Cw,2.397940009,LogBCF (L/kg bdwt),FW,ArnotGobas,"Toxicity, Absorption a Elimination of Phosphoric Acid Triesters by Killifish a Goldfish","Sasaki, K., M. Takeda, a M. Uchiyama",1981,Bull.Environ.Contam.Toxicol. 27:775-782,O=P(OC1=CC=CC=C1)(OC1=CC=CC=C1)OC1=CC=CC=C1
115-86-6,WB,14,Alburnus alburnus,FT,Cb/Cw,2.602059991,LogBCF (L/kg bdwt),Brackish,ArnotGobas,Bioaccumulation a Effects of Some Technical Triaryl Phosphate Products in Fish a Nitocra spinipes.,"Bengtsson, B.E. et al.",1986,Environ.Toxicol.Chem. 5:853-861,O=P(OC1=CC=CC=C1)(OC1=CC=CC=C1)OC1=CC=CC=C1
115-86-6,WB,1,Oryzias latipes,S,Cb/Cw,2.698970004,LogBCF (L/kg bdwt),FW,ArnotGobas,"Toxicity, Absorption a Elimination of Phosphoric Acid Triesters by Killifish a Goldfish","Sasaki, K., M. Takeda, a M. Uchiyama",1981,Bull.Environ.Contam.Toxicol. 27:775-782,O=P(OC1=CC=CC=C1)(OC1=CC=CC=C1)OC1=CC=CC=C1
115-86-6,WB,2,Oryzias latipes,S,Cb/Cw,2.681241237,LogBCF (L/kg bdwt),FW,ArnotGobas,"Toxicity, Absorption a Elimination of Phosphoric Acid Triesters by Killifish a Goldfish","Sasaki, K., M. Takeda, a M. Uchiyama",1981,Bull.Environ.Contam.Toxicol. 27:775-782,O=P(OC1=CC=CC=C1)(OC1=CC=CC=C1)OC1=CC=CC=C1
115-86-6,WB,0.5,Oryzias latipes,S,Cb/Cw,2.51851394,LogBCF (L/kg bdwt),FW,ArnotGobas,"Toxicity, Absorption a Elimination of Phosphoric Acid Triesters by Killifish a Goldfish","Sasaki, K., M. Takeda, a M. Uchiyama",1981,Bull.Environ.Contam.Toxicol. 27:775-782,O=P(OC1=CC=CC=C1)(OC1=CC=CC=C1)OC1=CC=CC=C1
115-86-6,WB,1,Carassius auratus,S,Cb/Cw,2.176091259,LogBCF (L/kg bdwt),FW,ArnotGobas,"Toxicity, Absorption a Elimination of Phosphoric Acid Triesters by Killifish a Goldfish","Sasaki, K., M. Takeda, a M. Uchiyama",1981,Bull.Environ.Contam.Toxicol. 27:775-782,O=P(OC1=CC=CC=C1)(OC1=CC=CC=C1)OC1=CC=CC=C1
115-86-6,WB,2,Carassius auratus,S,Cb/Cw,2.113943352,LogBCF (L/kg bdwt),FW,ArnotGobas,"Toxicity, Absorption a Elimination of Phosphoric Acid Triesters by Killifish a Goldfish","Sasaki, K., M. Takeda, a M. Uchiyama",1981,Bull.Environ.Contam.Toxicol. 27:775-782,O=P(OC1=CC=CC=C1)(OC1=CC=CC=C1)OC1=CC=CC=C1
115-86-6,WB,3,Carassius auratus,S,Cb/Cw,2.041392685,LogBCF (L/kg bdwt),FW,ArnotGobas,"Toxicity, Absorption a Elimination of Phosphoric Acid Triesters by Killifish a Goldfish","Sasaki, K., M. Takeda, a M. Uchiyama",1981,Bull.Environ.Contam.Toxicol. 27:775-782,O=P(OC1=CC=CC=C1)(OC1=CC=CC=C1)OC1=CC=CC=C1
115-86-6,WB,32,Oryzias latipes,FT,,2.285557309,LogBCF (L/kg bdwt),FW,ArnotGobas,Bioconcentration a Excretion of Phosphoric Acid Triesters by Killifish (Oryzias latipes),"Sasaki, K., T. Suzuki, M. Takeda, a M. Uchiyama",1982,Bull.Environ.Contam.Toxicol. 28:752-759,O=P(OC1=CC=CC=C1)(OC1=CC=CC=C1)OC1=CC=CC=C1
115-86-6,WB,35,Oryzias latipes,FT,,2.276461804,LogBCF (L/kg bdwt),FW,ArnotGobas,Bioconcentration a Excretion of Phosphoric Acid Triesters by Killifish (Oryzias latipes),"Sasaki, K., T. Suzuki, M. Takeda, a M. Uchiyama",1982,Bull.Environ.Contam.Toxicol. 28:752-759,O=P(OC1=CC=CC=C1)(OC1=CC=CC=C1)OC1=CC=CC=C1
117-18-0,WB,36,Oncorhynchus mykiss,FT,Cb/Cw,3.12904506,LogBCF (L/kg bdwt),FW,ArnotGobas,Octanol/Water Partition Coefficients a Bioconcentration Factors of Chloronitrobenzenes in Rainbow Trout (Salmo gairdneri),"Niimi, A.J., H.B. Lee, a G.P. Kissoon",1989,Environ.Toxicol.Chem. 8(9):817-823,[O-][N+](=O)C1=C(Cl)C(Cl)=CC(Cl)=C1Cl
117-18-0,WB,28,Oncorhynchus mykiss,FT,Cb/Cw,3.063333359,LogBCF (L/kg bdwt),FW,ArnotGobas,Octanol/Water Partition Coefficients a Bioconcentration Factors of Chloronitrobenzenes in Rainbow Trout (Salmo gairdneri),"Niimi, A.J., H.B. Lee, a G.P. Kissoon",1989,Environ.Toxicol.Chem. 8(9):817-823,[O-][N+](=O)C1=C(Cl)C(Cl)=CC(Cl)=C1Cl
117-18-0,WB,20,Oncorhynchus mykiss,FT,Cb/Cw,2.963787827,LogBCF (L/kg bdwt),FW,ArnotGobas,Octanol/Water Partition Coefficients a Bioconcentration Factors of Chloronitrobenzenes in Rainbow Trout (Salmo gairdneri),"Niimi, A.J., H.B. Lee, a G.P. Kissoon",1989,Environ.Toxicol.Chem. 8(9):817-823,[O-][N+](=O)C1=C(Cl)C(Cl)=CC(Cl)=C1Cl
117-18-0,WB,21,Oncorhynchus mykiss,FT,Cb/Cw,3.431363764,LogBCF (L/kg bdwt),FW,ArnotGobas,Bioconcentration Factors of Some Halogenated Organics for Rainbow Trout: Limitations in Their Use for Prediction of Environmental Residues,"Oliver, B.G., a A.J. Niimi",1985,Environ.Sci.Technol. 19(9):842-849,[O-][N+](=O)C1=C(Cl)C(Cl)=CC(Cl)=C1Cl
117-18-0,WB,50,Oncorhynchus mykiss,FT,Cb/Cw,3.414973348,LogBCF (L/kg bdwt),FW,ArnotGobas,Bioconcentration Factors of Some Halogenated Organics for Rainbow Trout: Limitations in Their Use for Prediction of Environmental Residues,"Oliver, B.G., a A.J. Niimi",1985,Environ.Sci.Technol. 19(9):842-849,[O-][N+](=O)C1=C(Cl)C(Cl)=CC(Cl)=C1Cl
117-18-0,WB,21,Oncorhynchus mykiss,FT,Cb/Cw,3.204119983,LogBCF (L/kg bdwt),FW,ArnotGobas,Bioconcentration Factors of Some Halogenated Organics for Rainbow Trout: Limitations in Their Use for Prediction of Environmental Residues,"Oliver, B.G., a A.J. Niimi",1985,Environ.Sci.Technol. 19(9):842-849,[O-][N+](=O)C1=C(Cl)C(Cl)=CC(Cl)=C1Cl
117-18-0,WB,35,Oncorhynchus mykiss,FT,Cb/Cw,3.380211242,LogBCF (L/kg bdwt),FW,ArnotGobas,Bioconcentration Factors of Some Halogenated Organics for Rainbow Trout: Limitations in Their Use for Prediction of Environmental Residues,"Oliver, B.G., a A.J. Niimi",1985,Environ.Sci.Technol. 19(9):842-849,[O-][N+](=O)C1=C(Cl)C(Cl)=CC(Cl)=C1Cl
117-18-0,WB,96,Oncorhynchus mykiss,FT,Cb/Cw,3.397940009,LogBCF (L/kg bdwt),FW,ArnotGobas,Bioconcentration Factors of Some Halogenated Organics for Rainbow Trout: Limitations in Their Use for Prediction of Environmental Residues,"Oliver, B.G., a A.J. Niimi",1985,Environ.Sci.Technol. 19(9):842-849,[O-][N+](=O)C1=C(Cl)C(Cl)=CC(Cl)=C1Cl
117-18-0,WB,50,Oncorhynchus mykiss,FT,Cb/Cw,3.322219295,LogBCF (L/kg bdwt),FW,ArnotGobas,Bioconcentration Factors of Some Halogenated Organics for Rainbow Trout: Limitations in Their Use for Prediction of Environmental Residues,"Oliver, B.G., a A.J. Niimi",1985,Environ.Sci.Technol. 19(9):842-849,[O-][N+](=O)C1=C(Cl)C(Cl)=CC(Cl)=C1Cl
117-18-0,WB,96,Oncorhynchus mykiss,FT,Cb/Cw,3.278753601,LogBCF (L/kg bdwt),FW,ArnotGobas,Bioconcentration Factors of Some Halogenated Organics for Rainbow Trout: Limitations in Their Use for Prediction of Environmental Residues,"Oliver, B.G., a A.J. Niimi",1985,Environ.Sci.Technol. 19(9):842-849,[O-][N+](=O)C1=C(Cl)C(Cl)=CC(Cl)=C1Cl
117-18-0,WB,35,Oncorhynchus mykiss,FT,Cb/Cw,3.255272505,LogBCF (L/kg bdwt),FW,ArnotGobas,Bioconcentration Factors of Some Halogenated Organics for Rainbow Trout: Limitations in Their Use for Prediction of Environmental Residues,"Oliver, B.G., a A.J. Niimi",1985,Environ.Sci.Technol. 19(9):842-849,[O-][N+](=O)C1=C(Cl)C(Cl)=CC(Cl)=C1Cl
117-18-0,WB,75,Oncorhynchus mykiss,FT,Cb/Cw,3.079181246,LogBCF (L/kg bdwt),FW,ArnotGobas,Bioconcentration Factors of Some Halogenated Organics for Rainbow Trout: Limitations in Their Use for Prediction of Environmental Residues,"Oliver, B.G., a A.J. Niimi",1985,Environ.Sci.Technol. 19(9):842-849,[O-][N+](=O)C1=C(Cl)C(Cl)=CC(Cl)=C1Cl
117-18-0,WB,75,Oncorhynchus mykiss,FT,Cb/Cw,2.949390007,LogBCF (L/kg bdwt),FW,ArnotGobas,Bioconcentration Factors of Some Halogenated Organics for Rainbow Trout: Limitations in Their Use for Prediction of Environmental Residues,"Oliver, B.G., a A.J. Niimi",1985,Environ.Sci.Technol. 19(9):842-849,[O-][N+](=O)C1=C(Cl)C(Cl)=CC(Cl)=C1Cl
117-18-0,WB,28,Oncorhynchus mykiss,FT,Cb/Cw,3.713490543,LogBCF (L/kg bdwt),FW,ArnotGobas,"The Toxicity of Tecnazene, a Potato Sprouting Inhibitor, to Freshwater Fauna","Whale, G., D. Sheahan, a P. Matthiessen",1988,Chemosphere 17(6):1205-1217,[O-][N+](=O)C1=C(Cl)C(Cl)=CC(Cl)=C1Cl
117-18-0,WB,14,Oncorhynchus mykiss,FT,Cb/Cw,3.440909082,LogBCF (L/kg bdwt),FW,ArnotGobas,"The Toxicity of Tecnazene, a Potato Sprouting Inhibitor, to Freshwater Fauna","Whale, G., D. Sheahan, a P. Matthiessen",1988,Chemosphere 17(6):1205-1217,[O-][N+](=O)C1=C(Cl)C(Cl)=CC(Cl)=C1Cl
117-18-0,WB,28,Oncorhynchus mykiss,FT,Cb/Cw,3.378397901,LogBCF (L/kg bdwt),FW,ArnotGobas,"The Toxicity of Tecnazene, a Potato Sprouting Inhibitor, to Freshwater Fauna","Whale, G., D. Sheahan, a P. Matthiessen",1988,Chemosphere 17(6):1205-1217,[O-][N+](=O)C1=C(Cl)C(Cl)=CC(Cl)=C1Cl
117-18-0,WB,14,Oncorhynchus mykiss,FT,Cb/Cw,3.36361198,LogBCF (L/kg bdwt),FW,ArnotGobas,"The Toxicity of Tecnazene, a Potato Sprouting Inhibitor, to Freshwater Fauna","Whale, G., D. Sheahan, a P. Matthiessen",1988,Chemosphere 17(6):1205-1217,[O-][N+](=O)C1=C(Cl)C(Cl)=CC(Cl)=C1Cl
117-18-0,WB,9,Oncorhynchus mykiss,FT,Cb/Cw,3.201397124,LogBCF (L/kg bdwt),FW,ArnotGobas,"The Toxicity of Tecnazene, a Potato Sprouting Inhibitor, to Freshwater Fauna","Whale, G., D. Sheahan, a P. Matthiessen",1988,Chemosphere 17(6):1205-1217,[O-][N+](=O)C1=C(Cl)C(Cl)=CC(Cl)=C1Cl
117-18-0,WB,14,Oncorhynchus mykiss,FT,Cb/Cw,2.86923172,LogBCF (L/kg bdwt),FW,ArnotGobas,"The Toxicity of Tecnazene, a Potato Sprouting Inhibitor, to Freshwater Fauna","Whale, G., D. Sheahan, a P. Matthiessen",1988,Chemosphere 17(6):1205-1217,[O-][N+](=O)C1=C(Cl)C(Cl)=CC(Cl)=C1Cl
117-79-3,WB,42,Cyprinus carpio,FT,Cb/Cw,1.541412607,LogBCF (L/kg bdwt),,ArnotGobas,Biodegradation a Bioconcentration of Existing Chemical Substances uer the Chemical Substances Control Law,Chemicals Evaluation a Research Institute,1992,http://qsar.cerij.or.jp/cgi-bin/DEGACC/iex.cgie,NC1=CC=C2C(=O)C3=CC=CC=C3C(=O)C2=C1
117-79-3,WB,42,Cyprinus carpio,FT,Cb/Cw,1.504510467,LogBCF (L/kg bdwt),,ArnotGobas,Biodegradation a Bioconcentration of Existing Chemical Substances uer the Chemical Substances Control Law,Chemicals Evaluation a Research Institute,1992,http://qsar.cerij.or.jp/cgi-bin/DEGACC/iex.cgie,NC1=CC=C2C(=O)C3=CC=CC=C3C(=O)C2=C1
117-81-7,WB,4,Cyprinodon variegatus,S,,2.804139432,LogBCF (L/kg bdwt),SW,ArnotGobas,A Pharmacokinetic Analysis of the Effect of Temperature on the Accumulation of di-2-Ethylhexyl Phthalate (DEHP) in Sheepshead Minnow,"Karara, A.H., a W.L. Hayton",1989,Aquat.Toxicol. 15(1):27-36,CCCCC(CC)COC(=O)C1=CC=CC=C1C(=O)OCC(CC)CCCC
117-81-7,WB,4,Cyprinodon variegatus,S,,2.983175072,LogBCF (L/kg bdwt),SW,ArnotGobas,A Pharmacokinetic Analysis of the Effect of Temperature on the Accumulation of di-2-Ethylhexyl Phthalate (DEHP) in Sheepshead Minnow,"Karara, A.H., a W.L. Hayton",1989,Aquat.Toxicol. 15(1):27-36,CCCCC(CC)COC(=O)C1=CC=CC=C1C(=O)OCC(CC)CCCC
117-81-7,,56,Pimephales promelas,FT,Cb/Cw,2.799340549,LogBCF (L/kg bdwt),FW,ArnotGobas,Residue Dynamics of Di-2-Ethylhexyl Phthalate in Fathead Minnows (Pimephales promelas),"Mayer, F.L.",1976,J.Fish.Res.Board Can. 33:2610-2613,CCCCC(CC)COC(=O)C1=CC=CC=C1C(=O)OCC(CC)CCCC
117-81-7,,56,Pimephales promelas,FT,Cb/Cw,2.769377326,LogBCF (L/kg bdwt),FW,ArnotGobas,Residue Dynamics of Di-2-Ethylhexyl Phthalate in Fathead Minnows (Pimephales promelas),"Mayer, F.L.",1976,J.Fish.Res.Board Can. 33:2610-2613,CCCCC(CC)COC(=O)C1=CC=CC=C1C(=O)OCC(CC)CCCC
117-81-7,,56,Pimephales promelas,FT,Cb/Cw,2.751279104,LogBCF (L/kg bdwt),FW,ArnotGobas,Residue Dynamics of Di-2-Ethylhexyl Phthalate in Fathead Minnows (Pimephales promelas),"Mayer, F.L.",1976,J.Fish.Res.Board Can. 33:2610-2613,CCCCC(CC)COC(=O)C1=CC=CC=C1C(=O)OCC(CC)CCCC
117-81-7,,56,Pimephales promelas,FT,Cb/Cw,2.431363764,LogBCF (L/kg bdwt),FW,ArnotGobas,Residue Dynamics of Di-2-Ethylhexyl Phthalate in Fathead Minnows (Pimephales promelas),"Mayer, F.L.",1976,J.Fish.Res.Board Can. 33:2610-2613,CCCCC(CC)COC(=O)C1=CC=CC=C1C(=O)OCC(CC)CCCC
118-44-5,WB,56,Cyprinus carpio,FT,Cb/Cw,2.323265989,LogBCF (L/kg bdwt),,ArnotGobas,Biodegradation a Bioconcentration of Existing Chemical Substances uer the Chemical Substances Control Law,Chemicals Evaluation a Research Institute,1992,http://qsar.cerij.or.jp/cgi-bin/DEGACC/iex.cgie,CCNC1=CC=CC2=CC=CC=C12
118-44-5,WB,56,Cyprinus carpio,FT,Cb/Cw,2.268829545,LogBCF (L/kg bdwt),,ArnotGobas,Biodegradation a Bioconcentration of Existing Chemical Substances uer the Chemical Substances Control Law,Chemicals Evaluation a Research Institute,1992,http://qsar.cerij.or.jp/cgi-bin/DEGACC/iex.cgie,CCNC1=CC=CC2=CC=CC=C12
118-74-1,WB,28,Pimephales promelas,FT,BIOFAC,4.698970004,LogBCF (L/kg bdwt),FW,ArnotGobas,The Precision of the ASTM Bioconcentration Test,"Kosian, P., A. Lemke, K. Studders, a G. Veith",1981,"EPA 600/3-81-022, U.S.EPA, Duluth, MN :20 p.",ClC1=C(Cl)C(Cl)=C(Cl)C(Cl)=C1Cl
118-74-1,WB,32,Pimephales promelas,FT,Cb/Cw,4.425968732,LogBCF (L/kg bdwt),FW,ArnotGobas,Toxicity of Chlorinated Benzenes to Fathead Minnows (Pimephales promelas),"Carlson, A.R., a P.A. Kosian",1987,Arch.Environ.Contam.Toxicol. 16(2):129-135,ClC1=C(Cl)C(Cl)=C(Cl)C(Cl)=C1Cl
118-74-1,WB,32,Pimephales promelas,FT,Cb/Cw,4.352182518,LogBCF (L/kg bdwt),FW,ArnotGobas,Toxicity of Chlorinated Benzenes to Fathead Minnows (Pimephales promelas),"Carlson, A.R., a P.A. Kosian",1987,Arch.Environ.Contam.Toxicol. 16(2):129-135,ClC1=C(Cl)C(Cl)=C(Cl)C(Cl)=C1Cl
118-74-1,WB,32,Pimephales promelas,FT,Cb/Cw,4.330993219,LogBCF (L/kg bdwt),FW,ArnotGobas,Toxicity of Chlorinated Benzenes to Fathead Minnows (Pimephales promelas),"Carlson, A.R., a P.A. Kosian",1987,Arch.Environ.Contam.Toxicol. 16(2):129-135,ClC1=C(Cl)C(Cl)=C(Cl)C(Cl)=C1Cl
118-74-1,WB,32,Pimephales promelas,FT,Cb/Cw,4.305530497,LogBCF (L/kg bdwt),FW,ArnotGobas,Toxicity of Chlorinated Benzenes to Fathead Minnows (Pimephales promelas),"Carlson, A.R., a P.A. Kosian",1987,Arch.Environ.Contam.Toxicol. 16(2):129-135,ClC1=C(Cl)C(Cl)=C(Cl)C(Cl)=C1Cl
118-74-1,WB,32,Pimephales promelas,FT,Cb/Cw,4.247784484,LogBCF (L/kg bdwt),FW,ArnotGobas,Toxicity of Chlorinated Benzenes to Fathead Minnows (Pimephales promelas),"Carlson, A.R., a P.A. Kosian",1987,Arch.Environ.Contam.Toxicol. 16(2):129-135,ClC1=C(Cl)C(Cl)=C(Cl)C(Cl)=C1Cl
118-74-1,WB,4,Gambusia affinis,R,K1/K2,3.571708832,LogBCF (L/kg bdwt),FW,ArnotGobas,Bioconcentration of Bromo- a Chlorobenzenes by Fish (Gambusia affinis),"Chaisuksant, Y., Q. Yu, a D.W. Connel",1997,Water Res. 31(1):61-68,ClC1=C(Cl)C(Cl)=C(Cl)C(Cl)=C1Cl
118-74-1,WB,56,Cyprinus carpio,FT,Cb/Cw,4.278753601,LogBCF (L/kg bdwt),FW,ArnotGobas,Biodegradation a Bioconcentration of Existing Chemical Substances uer the Chemical Substances Control Law,Chemicals Evaluation a Research Institute,1992,http://qsar.cerij.or.jp/cgi-bin/DEGACC/iex.cgie,ClC1=C(Cl)C(Cl)=C(Cl)C(Cl)=C1Cl
118-74-1,WB,56,Cyprinus carpio,FT,Cb/Cw,4.257979754,LogBCF (L/kg bdwt),FW,ArnotGobas,Biodegradation a Bioconcentration of Existing Chemical Substances uer the Chemical Substances Control Law,Chemicals Evaluation a Research Institute,1992,http://qsar.cerij.or.jp/cgi-bin/DEGACC/iex.cgie,ClC1=C(Cl)C(Cl)=C(Cl)C(Cl)=C1Cl
118-74-1,WB,2,Poecilia reticulata,FT,Cb/Cw,4.358970004,LogBCF (L/kg bdwt),FW,ArnotGobas,Thermodynamics of Fish/Water a Octanol/Water Partitioning of some Chlorinated Benzenes,"Opperhuizen, A., P. Serne a J.M.D. van der Steen",1988,Environ. Sci Technol. 22:286-292,ClC1=C(Cl)C(Cl)=C(Cl)C(Cl)=C1Cl
118-74-1,WB,2,Poecilia reticulata,FT,Cb/Cw,4.318970004,LogBCF (L/kg bdwt),FW,ArnotGobas,Thermodynamics of Fish/Water a Octanol/Water Partitioning of some Chlorinated Benzenes,"Opperhuizen, A., P. Serne a J.M.D. van der Steen",1988,Environ. Sci Technol. 22:286-292,ClC1=C(Cl)C(Cl)=C(Cl)C(Cl)=C1Cl
118-74-1,WB,2,Poecilia reticulata,FT,Cb/Cw,4.268970004,LogBCF (L/kg bdwt),FW,ArnotGobas,Thermodynamics of Fish/Water a Octanol/Water Partitioning of some Chlorinated Benzenes,"Opperhuizen, A., P. Serne a J.M.D. van der Steen",1988,Environ. Sci Technol. 22:286-292,ClC1=C(Cl)C(Cl)=C(Cl)C(Cl)=C1Cl
118-74-1,WB,15,Oryzias latipes,FT,K1/K2,4.16,LogBCF (L/kg bdwt),FW,ArnotGobas,"Fate of 2,4,6-Trichlorophenol, Pentachlorophenol, p-Chlorobiphenyl, a Hexachlorobenzene an Experimental Po: Comparison Between the Observations a Predictions based on Laboratory Data","Sugiura, K. et al",1984,Arch. Environ. Contam. Toxicol. 13:745-758,ClC1=C(Cl)C(Cl)=C(Cl)C(Cl)=C1Cl
118-74-1,,30,Oncorhynchus mykiss,R,,3.792531762,LogBCF (L/kg bdwt),FW,ArnotGobas,Influence of the Carrier Solvent on Aquatic Toxicity Tests,"Murty, A.S., a P.D. Hansen",1983,"In: K.Christiansen (Ed.), Chemicals in the Environment, Proc.Int.Symp., Lyngby, Denmark, 1982, Publ.West Germany:334-342",ClC1=C(Cl)C(Cl)=C(Cl)C(Cl)=C1Cl
118-74-1,,30,Oncorhynchus mykiss,R,,3.792531762,LogBCF (L/kg bdwt),FW,ArnotGobas,Influence of the Carrier Solvent on Aquatic Toxicity Tests,"Murty, A.S., a P.D. Hansen",1983,"In: K.Christiansen (Ed.), Chemicals in the Environment, Proc.Int.Symp., Lyngby, Denmark, 1982, Publ.West Germany:334-342",ClC1=C(Cl)C(Cl)=C(Cl)C(Cl)=C1Cl
118-74-1,,30,Oncorhynchus mykiss,R,,3.736953954,LogBCF (L/kg bdwt),FW,ArnotGobas,Influence of the Carrier Solvent on Aquatic Toxicity Tests,"Murty, A.S., a P.D. Hansen",1983,"In: K.Christiansen (Ed.), Chemicals in the Environment, Proc.Int.Symp., Lyngby, Denmark, 1982, Publ.West Germany:334-342",ClC1=C(Cl)C(Cl)=C(Cl)C(Cl)=C1Cl
118-74-1,,30,Oncorhynchus mykiss,R,,3.736953954,LogBCF (L/kg bdwt),FW,ArnotGobas,Influence of the Carrier Solvent on Aquatic Toxicity Tests,"Murty, A.S., a P.D. Hansen",1983,"In: K.Christiansen (Ed.), Chemicals in the Environment, Proc.Int.Symp., Lyngby, Denmark, 1982, Publ.West Germany:334-342",ClC1=C(Cl)C(Cl)=C(Cl)C(Cl)=C1Cl
118-74-1,,30,Oncorhynchus mykiss,R,,3.666985718,LogBCF (L/kg bdwt),FW,ArnotGobas,Influence of the Carrier Solvent on Aquatic Toxicity Tests,"Murty, A.S., a P.D. Hansen",1983,"In: K.Christiansen (Ed.), Chemicals in the Environment, Proc.Int.Symp., Lyngby, Denmark, 1982, Publ.West Germany:334-342",ClC1=C(Cl)C(Cl)=C(Cl)C(Cl)=C1Cl
118-74-1,,30,Oncorhynchus mykiss,R,,3.666985718,LogBCF (L/kg bdwt),FW,ArnotGobas,Influence of the Carrier Solvent on Aquatic Toxicity Tests,"Murty, A.S., a P.D. Hansen",1983,"In: K.Christiansen (Ed.), Chemicals in the Environment, Proc.Int.Symp., Lyngby, Denmark, 1982, Publ.West Germany:334-342",ClC1=C(Cl)C(Cl)=C(Cl)C(Cl)=C1Cl
118-79-6,WB,,Brachydanio rerio,FT,K1/K2,2.710117365,LogBCF (L/kg bdwt),FW,ArnotGobas,Bioaccumulation of Phenols in Zebrafish Determined by a Dynamic Flow Through Test,"Butte, W., Willing, A., Zauke, G.-P.",1987,"QSAR in Environmental Toxicology II pp.43-53 (K.L.E. Kaiser, Ed)",OC1=C(Br)C=C(Br)C=C1Br
118-83-2,WB,56,Cyprinus carpio,FT,Cb/Cw,1.963579378,LogBCF (L/kg bdwt),,ArnotGobas,Biodegradation a Bioconcentration of Existing Chemical Substances uer the Chemical Substances Control Law,Chemicals Evaluation a Research Institute,1992,http://qsar.cerij.or.jp/cgi-bin/DEGACC/iex.cgie,[O-][N+](=O)C1=CC=C(Cl)C=C1C(F)(F)F
118-83-2,WB,56,Cyprinus carpio,FT,Cb/Cw,1.870433968,LogBCF (L/kg bdwt),,ArnotGobas,Biodegradation a Bioconcentration of Existing Chemical Substances uer the Chemical Substances Control Law,Chemicals Evaluation a Research Institute,1992,http://qsar.cerij.or.jp/cgi-bin/DEGACC/iex.cgie,[O-][N+](=O)C1=CC=C(Cl)C=C1C(F)(F)F
119-12-0,WB,7.01,Cyprinus carpio,FT,Cb/Cw,0.77815125,LogBCF (L/kg bdwt),FW,ArnotGobas,Accumulation a Excretion of Organophosphorous Pesticides by Carp Cyprinus carpio,"Tsuda, T., S. Aoki, M. Kojima, a T. Fujita",1993,Comp.Biochem.Physiol.C 104(2):275-278,CCOP(=S)(OCC)OC1=NN(C(=O)C=C1)C1=CC=CC=C1
119-12-0,WB,1,Cyprinus carpio,FT,Cb/Cw,0.662757832,LogBCF (L/kg bdwt),FW,ArnotGobas,Accumulation a Excretion of Organophosphorous Pesticides by Carp Cyprinus carpio,"Tsuda, T., S. Aoki, M. Kojima, a T. Fujita",1993,Comp.Biochem.Physiol.C 104(2):275-278,CCOP(=S)(OCC)OC1=NN(C(=O)C=C1)C1=CC=CC=C1
119-12-0,WB,3,Cyprinus carpio,FT,Cb/Cw,0.662757832,LogBCF (L/kg bdwt),FW,ArnotGobas,Accumulation a Excretion of Organophosphorous Pesticides by Carp Cyprinus carpio,"Tsuda, T., S. Aoki, M. Kojima, a T. Fujita",1993,Comp.Biochem.Physiol.C 104(2):275-278,CCOP(=S)(OCC)OC1=NN(C(=O)C=C1)C1=CC=CC=C1
119-12-0,WB,5,Cyprinus carpio,FT,Cb/Cw,0.568201724,LogBCF (L/kg bdwt),FW,ArnotGobas,Accumulation a Excretion of Organophosphorous Pesticides by Carp Cyprinus carpio,"Tsuda, T., S. Aoki, M. Kojima, a T. Fujita",1993,Comp.Biochem.Physiol.C 104(2):275-278,CCOP(=S)(OCC)OC1=NN(C(=O)C=C1)C1=CC=CC=C1
119-33-5,WB,42,Cyprinus carpio,FT,Cb/Cw,0.951686365,LogBCF (L/kg bdwt),,ArnotGobas,Biodegradation a Bioconcentration of Existing Chemical Substances uer the Chemical Substances Control Law,Chemicals Evaluation a Research Institute,1992,http://qsar.cerij.or.jp/cgi-bin/DEGACC/iex.cgie,CC1=CC=C(O)C(=C1)[N+]([O-])=O
119-33-5,WB,42,Cyprinus carpio,FT,Cb/Cw,0.822455842,LogBCF (L/kg bdwt),,ArnotGobas,Biodegradation a Bioconcentration of Existing Chemical Substances uer the Chemical Substances Control Law,Chemicals Evaluation a Research Institute,1992,http://qsar.cerij.or.jp/cgi-bin/DEGACC/iex.cgie,CC1=CC=C(O)C(=C1)[N+]([O-])=O
119-56-2,WB,56,Cyprinus carpio,FT,Cb/Cw,1.788908691,LogBCF (L/kg bdwt),,ArnotGobas,Biodegradation a Bioconcentration of Existing Chemical Substances uer the Chemical Substances Control Law,Chemicals Evaluation a Research Institute,1992,http://qsar.cerij.or.jp/cgi-bin/DEGACC/iex.cgie,OC(C1=CC=CC=C1)C1=CC=C(Cl)C=C1
119-56-2,WB,56,Cyprinus carpio,FT,Cb/Cw,1.746280421,LogBCF (L/kg bdwt),,ArnotGobas,Biodegradation a Bioconcentration of Existing Chemical Substances uer the Chemical Substances Control Law,Chemicals Evaluation a Research Institute,1992,http://qsar.cerij.or.jp/cgi-bin/DEGACC/iex.cgie,OC(C1=CC=CC=C1)C1=CC=C(Cl)C=C1
12002-48-1,WB,16.9,Poecilia reticulata,FT,Cb/Cw,3.056523724,LogBCF (L/kg bdwt),FW,ArnotGobas,"Uptake a Elimination of 1,2,4-Trichlorobenzene in the Guppy (Poecilia reticulata) at Sublethal a Lethal Aqueous Concentrations","Van Eck, J.M.C., A.A. Koelmans, a J.W. Deneer",1997,Chemosphere 34(11):2259-2270,ClC1=CC=CC(Cl)=C1Cl
12002-48-1,WB,16.9,Poecilia reticulata,FT,K1/K2,3.001733713,LogBCF (L/kg bdwt),FW,ArnotGobas,"Uptake a Elimination of 1,2,4-Trichlorobenzene in the Guppy (Poecilia reticulata) at Sublethal a Lethal Aqueous Concentrations","Van Eck, J.M.C., A.A. Koelmans, a J.W. Deneer",1997,Chemosphere 34(11):2259-2270,ClC1=CC=CC(Cl)=C1Cl
120-12-7,WB,56,Cyprinus carpio,FT,Cb/Cw,3.256837966,LogBCF (L/kg bdwt),FW,ArnotGobas,Biodegradation a Bioconcentration of Existing Chemical Substances uer the Chemical Substances Control Law,National Institute of Technology a Evaluation,2005,http://www.nite.go.jp/iex-e.html,C1=CC2=CC3=CC=CC=C3C=C2C=C1
120-12-7,Whole body - gonads,14,Pimephales promelas,FT,Cb/Cw,3.554004321,LogBCF (L/kg bdwt),FW,ArnotGobas,Anthracene Reduces Reproductive Potential a is Maternally Transferred During Long-Term Exposure in Fathead Minnows.,"Hall, A.T. a J.T.Oris",1991,Aquat. Toxicol. 19(3):249-264,C1=CC2=CC3=CC=CC=C3C=C2C=C1
120-12-7,Whole body - gonads,14,Pimephales promelas,FT,Cb/Cw,3.051538391,LogBCF (L/kg bdwt),FW,ArnotGobas,Anthracene Reduces Reproductive Potential a is Maternally Transferred During Long-Term Exposure in Fathead Minnows.,"Hall, A.T. a J.T.Oris",1991,Aquat. Toxicol. 19(3):249-264,C1=CC2=CC3=CC=CC=C3C=C2C=C1
120-12-7,WB,56,Cyprinus carpio,FT,Cb/Cw,3.350248018,LogBCF (L/kg bdwt),FW,ArnotGobas,Biodegradation a Bioconcentration of Existing Chemical Substances uer the Chemical Substances Control Law,National Institute of Technology a Evaluation,2005,http://www.nite.go.jp/iex-e.html,C1=CC2=CC3=CC=CC=C3C=C2C=C1
120-12-7,WB,,Carassius auratus,,Cb/Cw,2.209515015,LogBCF (L/kg bdwt),,ArnotGobas,Partition Coefficients as a Measure of Bioconcentration Potential of Crude Oil Compous in Fish a Shellfish,"Ogata, M., K. Fujisawa, Y. Ogino a E. Mano",1984,Bull. Environ. Contam. Toxicol. 33:561-567,C1=CC2=CC3=CC=CC=C3C=C2C=C1
120-12-7,WB,0.17,Lepomis macrochirus,S,K1/K2,2.91850214,LogBCF (L/kg bdwt),FW,ArnotGobas,"Uptake, Depuration a Biotransformation of Anthracene a Benzo-a-pyrene in Bluegill Sunfish.","Spacie, A., P. F. Larum, a G. J. Leversee",1983,Ecotox. Env. Saf. 7:330-341,C1=CC2=CC3=CC=CC=C3C=C2C=C1
120-71-8,WB,42,Cyprinus carpio,FT,Cb/Cw,1.4,LogBCF (L/kg bdwt),,ArnotGobas,Biodegradation a Bioconcentration of Existing Chemical Substances uer the Chemical Substances Control Law,Chemicals Evaluation a Research Institute,1992,http://qsar.cerij.or.jp/cgi-bin/DEGACC/iex.cgie,COC1=CC=C(C)C=C1N
120-71-8,WB,42,Cyprinus carpio,FT,Cb/Cw,0.66,LogBCF (L/kg bdwt),,ArnotGobas,Biodegradation a Bioconcentration of Existing Chemical Substances uer the Chemical Substances Control Law,Chemicals Evaluation a Research Institute,1992,http://qsar.cerij.or.jp/cgi-bin/DEGACC/iex.cgie,COC1=CC=C(C)C=C1N
120-82-1,WB,63,Oncorhynchus mykiss,FT,Cb/Cw,3.431363764,LogBCF (L/kg bdwt),FW,ArnotGobas,Bioconcentration of Chlorobenzenes from Water by Rainbow Trout: Correlations with Partition Coefficients a Environmental Residues,"Oliver, B.G. a A.J. Niimi",1983,Environ.Sci.Technol. 17:287-291,ClC1=CC=C(Cl)C(Cl)=C1
120-82-1,WB,32,Pimephales promelas,FT,Cb/Cw,2.716003344,LogBCF (L/kg bdwt),FW,ArnotGobas,"Effects of Lowered Dissolved Oxygen Concentration on the Toxicity of 1,2,4-Trichlorobenzene to Fathead Minnows","Carlson, A.R.",1987,Bull.Environ.Contam.Toxicol. 38:667-673,ClC1=CC=C(Cl)C(Cl)=C1
120-82-1,WB,32,Pimephales promelas,FT,Cb/Cw,2.707570176,LogBCF (L/kg bdwt),FW,ArnotGobas,"Effects of Lowered Dissolved Oxygen Concentration on the Toxicity of 1,2,4-Trichlorobenzene to Fathead Minnows","Carlson, A.R.",1987,Bull.Environ.Contam.Toxicol. 38:667-673,ClC1=CC=C(Cl)C(Cl)=C1
120-82-1,WB,32,Pimephales promelas,FT,Cb/Cw,2.681241237,LogBCF (L/kg bdwt),FW,ArnotGobas,"Effects of Lowered Dissolved Oxygen Concentration on the Toxicity of 1,2,4-Trichlorobenzene to Fathead Minnows","Carlson, A.R.",1987,Bull.Environ.Contam.Toxicol. 38:667-673,ClC1=CC=C(Cl)C(Cl)=C1
120-82-1,WB,32,Pimephales promelas,FT,Cb/Cw,2.662757832,LogBCF (L/kg bdwt),FW,ArnotGobas,"Effects of Lowered Dissolved Oxygen Concentration on the Toxicity of 1,2,4-Trichlorobenzene to Fathead Minnows","Carlson, A.R.",1987,Bull.Environ.Contam.Toxicol. 38:667-673,ClC1=CC=C(Cl)C(Cl)=C1
120-82-1,WB,32,Pimephales promelas,FT,Cb/Cw,2.653212514,LogBCF (L/kg bdwt),FW,ArnotGobas,"Effects of Lowered Dissolved Oxygen Concentration on the Toxicity of 1,2,4-Trichlorobenzene to Fathead Minnows","Carlson, A.R.",1987,Bull.Environ.Contam.Toxicol. 38:667-673,ClC1=CC=C(Cl)C(Cl)=C1
120-82-1,WB,32,Pimephales promelas,FT,Cb/Cw,2.633468456,LogBCF (L/kg bdwt),FW,ArnotGobas,"Effects of Lowered Dissolved Oxygen Concentration on the Toxicity of 1,2,4-Trichlorobenzene to Fathead Minnows","Carlson, A.R.",1987,Bull.Environ.Contam.Toxicol. 38:667-673,ClC1=CC=C(Cl)C(Cl)=C1
120-82-1,WB,32,Pimephales promelas,FT,Cb/Cw,2.612783857,LogBCF (L/kg bdwt),FW,ArnotGobas,"Effects of Lowered Dissolved Oxygen Concentration on the Toxicity of 1,2,4-Trichlorobenzene to Fathead Minnows","Carlson, A.R.",1987,Bull.Environ.Contam.Toxicol. 38:667-673,ClC1=CC=C(Cl)C(Cl)=C1
120-82-1,WB,32,Pimephales promelas,FT,Cb/Cw,2.62324929,LogBCF (L/kg bdwt),FW,ArnotGobas,"Effects of Lowered Dissolved Oxygen Concentration on the Toxicity of 1,2,4-Trichlorobenzene to Fathead Minnows","Carlson, A.R.",1987,Bull.Environ.Contam.Toxicol. 38:667-673,ClC1=CC=C(Cl)C(Cl)=C1
120-82-1,WB,32,Pimephales promelas,FT,Cb/Cw,2.602059991,LogBCF (L/kg bdwt),FW,ArnotGobas,"Effects of Lowered Dissolved Oxygen Concentration on the Toxicity of 1,2,4-Trichlorobenzene to Fathead Minnows","Carlson, A.R.",1987,Bull.Environ.Contam.Toxicol. 38:667-673,ClC1=CC=C(Cl)C(Cl)=C1
120-82-1,WB,32,Pimephales promelas,FT,Cb/Cw,2.579783597,LogBCF (L/kg bdwt),FW,ArnotGobas,"Effects of Lowered Dissolved Oxygen Concentration on the Toxicity of 1,2,4-Trichlorobenzene to Fathead Minnows","Carlson, A.R.",1987,Bull.Environ.Contam.Toxicol. 38:667-673,ClC1=CC=C(Cl)C(Cl)=C1
120-82-1,WB,32,Pimephales promelas,FT,Cb/Cw,2.505149978,LogBCF (L/kg bdwt),FW,ArnotGobas,"Effects of Lowered Dissolved Oxygen Concentration on the Toxicity of 1,2,4-Trichlorobenzene to Fathead Minnows","Carlson, A.R.",1987,Bull.Environ.Contam.Toxicol. 38:667-673,ClC1=CC=C(Cl)C(Cl)=C1
120-82-1,WB,32,Pimephales promelas,FT,Cb/Cw,2.505149978,LogBCF (L/kg bdwt),FW,ArnotGobas,"Effects of Lowered Dissolved Oxygen Concentration on the Toxicity of 1,2,4-Trichlorobenzene to Fathead Minnows","Carlson, A.R.",1987,Bull.Environ.Contam.Toxicol. 38:667-673,ClC1=CC=C(Cl)C(Cl)=C1
120-82-1,WB,32,Pimephales promelas,FT,Cb/Cw,2.477121255,LogBCF (L/kg bdwt),FW,ArnotGobas,"Effects of Lowered Dissolved Oxygen Concentration on the Toxicity of 1,2,4-Trichlorobenzene to Fathead Minnows","Carlson, A.R.",1987,Bull.Environ.Contam.Toxicol. 38:667-673,ClC1=CC=C(Cl)C(Cl)=C1
120-82-1,WB,32,Pimephales promelas,FT,Cb/Cw,2.431363764,LogBCF (L/kg bdwt),FW,ArnotGobas,"Effects of Lowered Dissolved Oxygen Concentration on the Toxicity of 1,2,4-Trichlorobenzene to Fathead Minnows","Carlson, A.R.",1987,Bull.Environ.Contam.Toxicol. 38:667-673,ClC1=CC=C(Cl)C(Cl)=C1
120-82-1,WB,32,Pimephales promelas,FT,Cb/Cw,2.462397998,LogBCF (L/kg bdwt),FW,ArnotGobas,"Effects of Lowered Dissolved Oxygen Concentration on the Toxicity of 1,2,4-Trichlorobenzene to Fathead Minnows","Carlson, A.R.",1987,Bull.Environ.Contam.Toxicol. 38:667-673,ClC1=CC=C(Cl)C(Cl)=C1
120-82-1,WB,42,Cyprinus carpio,FT,Cb/Cw,2.892094603,LogBCF (L/kg bdwt),FW,ArnotGobas,Biodegradation a Bioconcentration of Existing Chemical Substances uer the Chemical Substances Control Law,Chemicals Evaluation a Research Institute,1992,http://qsar.cerij.or.jp/cgi-bin/DEGACC/iex.cgie,ClC1=CC=C(Cl)C(Cl)=C1
120-82-1,WB,42,Cyprinus carpio,FT,Cb/Cw,2.857332496,LogBCF (L/kg bdwt),FW,ArnotGobas,Biodegradation a Bioconcentration of Existing Chemical Substances uer the Chemical Substances Control Law,Chemicals Evaluation a Research Institute,1992,http://qsar.cerij.or.jp/cgi-bin/DEGACC/iex.cgie,ClC1=CC=C(Cl)C(Cl)=C1
120-82-1,WB,2,Oncorhynchus mykiss,FT,K1/K2,2.542825427,LogBCF (L/kg bdwt),FW,ArnotGobas,"Toxicokinetics of 1,2,3 a 1,2,4 Trichlorobenzenes in Early Life Stages of Salmo gairdneri","Galassi, S., a D. Calamari",1983,Chemosphere 12(11/12):1599-1603,ClC1=CC=C(Cl)C(Cl)=C1
120-82-1,WB,2,Oncorhynchus mykiss,FT,K1/K2,1.591064607,LogBCF (L/kg bdwt),FW,ArnotGobas,"Toxicokinetics of 1,2,3 a 1,2,4 Trichlorobenzenes in Early Life Stages of Salmo gairdneri","Galassi, S., a D. Calamari",1983,Chemosphere 12(11/12):1599-1603,ClC1=CC=C(Cl)C(Cl)=C1
120-82-1,WB,28,Pimephales promelas,FT,Cb/Cw,3.255272505,LogBCF (L/kg bdwt),FW,ArnotGobas,The Precision of the ASTM Bioconcentration Test,"Kosian, P., A. Lemke, K. Studders, a G. Veith",1981,"EPA 600/3-81-022, U.S.EPA, Duluth, MN :20 p.",ClC1=CC=C(Cl)C(Cl)=C1
120-82-1,WB,28,Pimephales promelas,FT,Cb/Cw,3.247973266,LogBCF (L/kg bdwt),FW,ArnotGobas,The Precision of the ASTM Bioconcentration Test,"Kosian, P., A. Lemke, K. Studders, a G. Veith",1981,"EPA 600/3-81-022, U.S.EPA, Duluth, MN :20 p.",ClC1=CC=C(Cl)C(Cl)=C1
120-82-1,WB,28,Pimephales promelas,FT,Cb/Cw,3.238046103,LogBCF (L/kg bdwt),FW,ArnotGobas,The Precision of the ASTM Bioconcentration Test,"Kosian, P., A. Lemke, K. Studders, a G. Veith",1981,"EPA 600/3-81-022, U.S.EPA, Duluth, MN :20 p.",ClC1=CC=C(Cl)C(Cl)=C1
120-82-1,WB,28,Pimephales promelas,FT,Cb/Cw,3.214843848,LogBCF (L/kg bdwt),FW,ArnotGobas,The Precision of the ASTM Bioconcentration Test,"Kosian, P., A. Lemke, K. Studders, a G. Veith",1981,"EPA 600/3-81-022, U.S.EPA, Duluth, MN :20 p.",ClC1=CC=C(Cl)C(Cl)=C1
120-82-1,WB,16,Pimephales promelas,FT,Cb/Cw,3.195899652,LogBCF (L/kg bdwt),FW,ArnotGobas,The Precision of the ASTM Bioconcentration Test,"Kosian, P., A. Lemke, K. Studders, a G. Veith",1981,"EPA 600/3-81-022, U.S.EPA, Duluth, MN :20 p.",ClC1=CC=C(Cl)C(Cl)=C1
120-82-1,WB,16,Pimephales promelas,FT,Cb/Cw,3.187520721,LogBCF (L/kg bdwt),FW,ArnotGobas,The Precision of the ASTM Bioconcentration Test,"Kosian, P., A. Lemke, K. Studders, a G. Veith",1981,"EPA 600/3-81-022, U.S.EPA, Duluth, MN :20 p.",ClC1=CC=C(Cl)C(Cl)=C1
120-82-1,WB,8,Pimephales promelas,FT,Cb/Cw,3.181843588,LogBCF (L/kg bdwt),FW,ArnotGobas,The Precision of the ASTM Bioconcentration Test,"Kosian, P., A. Lemke, K. Studders, a G. Veith",1981,"EPA 600/3-81-022, U.S.EPA, Duluth, MN :20 p.",ClC1=CC=C(Cl)C(Cl)=C1
120-82-1,WB,4,Pimephales promelas,FT,Cb/Cw,3.152288344,LogBCF (L/kg bdwt),FW,ArnotGobas,The Precision of the ASTM Bioconcentration Test,"Kosian, P., A. Lemke, K. Studders, a G. Veith",1981,"EPA 600/3-81-022, U.S.EPA, Duluth, MN :20 p.",ClC1=CC=C(Cl)C(Cl)=C1
120-82-1,WB,16,Pimephales promelas,FT,Cb/Cw,3.133538908,LogBCF (L/kg bdwt),FW,ArnotGobas,The Precision of the ASTM Bioconcentration Test,"Kosian, P., A. Lemke, K. Studders, a G. Veith",1981,"EPA 600/3-81-022, U.S.EPA, Duluth, MN :20 p.",ClC1=CC=C(Cl)C(Cl)=C1
120-82-1,WB,4,Pimephales promelas,FT,Cb/Cw,3.127104798,LogBCF (L/kg bdwt),FW,ArnotGobas,The Precision of the ASTM Bioconcentration Test,"Kosian, P., A. Lemke, K. Studders, a G. Veith",1981,"EPA 600/3-81-022, U.S.EPA, Duluth, MN :20 p.",ClC1=CC=C(Cl)C(Cl)=C1
120-82-1,WB,16,Pimephales promelas,FT,Cb/Cw,3.117271296,LogBCF (L/kg bdwt),FW,ArnotGobas,The Precision of the ASTM Bioconcentration Test,"Kosian, P., A. Lemke, K. Studders, a G. Veith",1981,"EPA 600/3-81-022, U.S.EPA, Duluth, MN :20 p.",ClC1=CC=C(Cl)C(Cl)=C1
120-82-1,WB,8,Pimephales promelas,FT,Cb/Cw,3.113943352,LogBCF (L/kg bdwt),FW,ArnotGobas,The Precision of the ASTM Bioconcentration Test,"Kosian, P., A. Lemke, K. Studders, a G. Veith",1981,"EPA 600/3-81-022, U.S.EPA, Duluth, MN :20 p.",ClC1=CC=C(Cl)C(Cl)=C1
120-82-1,WB,4,Pimephales promelas,FT,Cb/Cw,3.093421685,LogBCF (L/kg bdwt),FW,ArnotGobas,The Precision of the ASTM Bioconcentration Test,"Kosian, P., A. Lemke, K. Studders, a G. Veith",1981,"EPA 600/3-81-022, U.S.EPA, Duluth, MN :20 p.",ClC1=CC=C(Cl)C(Cl)=C1
120-82-1,WB,8,Pimephales promelas,FT,Cb/Cw,3.079181246,LogBCF (L/kg bdwt),FW,ArnotGobas,The Precision of the ASTM Bioconcentration Test,"Kosian, P., A. Lemke, K. Studders, a G. Veith",1981,"EPA 600/3-81-022, U.S.EPA, Duluth, MN :20 p.",ClC1=CC=C(Cl)C(Cl)=C1
120-82-1,WB,2,Pimephales promelas,FT,Cb/Cw,3.068185862,LogBCF (L/kg bdwt),FW,ArnotGobas,The Precision of the ASTM Bioconcentration Test,"Kosian, P., A. Lemke, K. Studders, a G. Veith",1981,"EPA 600/3-81-022, U.S.EPA, Duluth, MN :20 p.",ClC1=CC=C(Cl)C(Cl)=C1
120-82-1,WB,8,Pimephales promelas,FT,Cb/Cw,3.056904851,LogBCF (L/kg bdwt),FW,ArnotGobas,The Precision of the ASTM Bioconcentration Test,"Kosian, P., A. Lemke, K. Studders, a G. Veith",1981,"EPA 600/3-81-022, U.S.EPA, Duluth, MN :20 p.",ClC1=CC=C(Cl)C(Cl)=C1
120-82-1,WB,4,Pimephales promelas,FT,Cb/Cw,3.041392685,LogBCF (L/kg bdwt),FW,ArnotGobas,The Precision of the ASTM Bioconcentration Test,"Kosian, P., A. Lemke, K. Studders, a G. Veith",1981,"EPA 600/3-81-022, U.S.EPA, Duluth, MN :20 p.",ClC1=CC=C(Cl)C(Cl)=C1
120-82-1,WB,2,Pimephales promelas,FT,Cb/Cw,3.033423755,LogBCF (L/kg bdwt),FW,ArnotGobas,The Precision of the ASTM Bioconcentration Test,"Kosian, P., A. Lemke, K. Studders, a G. Veith",1981,"EPA 600/3-81-022, U.S.EPA, Duluth, MN :20 p.",ClC1=CC=C(Cl)C(Cl)=C1
120-82-1,WB,2,Pimephales promelas,FT,Cb/Cw,3.029383778,LogBCF (L/kg bdwt),FW,ArnotGobas,The Precision of the ASTM Bioconcentration Test,"Kosian, P., A. Lemke, K. Studders, a G. Veith",1981,"EPA 600/3-81-022, U.S.EPA, Duluth, MN :20 p.",ClC1=CC=C(Cl)C(Cl)=C1
120-82-1,WB,2,Pimephales promelas,FT,Cb/Cw,3.029383778,LogBCF (L/kg bdwt),FW,ArnotGobas,The Precision of the ASTM Bioconcentration Test,"Kosian, P., A. Lemke, K. Studders, a G. Veith",1981,"EPA 600/3-81-022, U.S.EPA, Duluth, MN :20 p.",ClC1=CC=C(Cl)C(Cl)=C1
120-82-1,WB,22,Oncorhynchus mykiss,FT,Cb/Cw,3.477121255,LogBCF (L/kg bdwt),FW,ArnotGobas,Bioconcentration of Chlorobenzenes from Water by Rainbow Trout: Correlations with Partition Coefficients a Environmental Residues,"Oliver, B.G. a A.J. Niimi",1983,Environ.Sci.Technol. 17:287-291,ClC1=CC=C(Cl)C(Cl)=C1
120-82-1,WB,43,Oncorhynchus mykiss,FT,Cb/Cw,3.602059991,LogBCF (L/kg bdwt),FW,ArnotGobas,Bioconcentration of Chlorobenzenes from Water by Rainbow Trout: Correlations with Partition Coefficients a Environmental Residues,"Oliver, B.G. a A.J. Niimi",1983,Environ.Sci.Technol. 17:287-291,ClC1=CC=C(Cl)C(Cl)=C1
120-82-1,WB,105,Oncorhynchus mykiss,FT,Cb/Cw,3.531478917,LogBCF (L/kg bdwt),FW,ArnotGobas,Bioconcentration of Chlorobenzenes from Water by Rainbow Trout: Correlations with Partition Coefficients a Environmental Residues,"Oliver, B.G. a A.J. Niimi",1983,Environ.Sci.Technol. 17:287-291,ClC1=CC=C(Cl)C(Cl)=C1
120-82-1,WB,39,Oncorhynchus mykiss,FT,Cb/Cw,3.278753601,LogBCF (L/kg bdwt),FW,ArnotGobas,Bioconcentration of Chlorobenzenes from Water by Rainbow Trout: Correlations with Partition Coefficients a Environmental Residues,"Oliver, B.G. a A.J. Niimi",1983,Environ.Sci.Technol. 17:287-291,ClC1=CC=C(Cl)C(Cl)=C1
120-82-1,WB,119,Oncorhynchus mykiss,FT,Cb/Cw,3.113943352,LogBCF (L/kg bdwt),FW,ArnotGobas,Bioconcentration of Chlorobenzenes from Water by Rainbow Trout: Correlations with Partition Coefficients a Environmental Residues,"Oliver, B.G. a A.J. Niimi",1983,Environ.Sci.Technol. 17:287-291,ClC1=CC=C(Cl)C(Cl)=C1
120-82-1,WB,69,Oncorhynchus mykiss,FT,Cb/Cw,3.079181246,LogBCF (L/kg bdwt),FW,ArnotGobas,Bioconcentration of Chlorobenzenes from Water by Rainbow Trout: Correlations with Partition Coefficients a Environmental Residues,"Oliver, B.G. a A.J. Niimi",1983,Environ.Sci.Technol. 17:287-291,ClC1=CC=C(Cl)C(Cl)=C1
120-82-1,WB,99,Oncorhynchus mykiss,FT,Cb/Cw,3.041392685,LogBCF (L/kg bdwt),FW,ArnotGobas,Bioconcentration of Chlorobenzenes from Water by Rainbow Trout: Correlations with Partition Coefficients a Environmental Residues,"Oliver, B.G. a A.J. Niimi",1983,Environ.Sci.Technol. 17:287-291,ClC1=CC=C(Cl)C(Cl)=C1
120-82-1,WB,7,Oncorhynchus mykiss,FT,Cb/Cw,3.301029996,LogBCF (L/kg bdwt),FW,ArnotGobas,Bioconcentration Factors of Some Halogenated Organics for Rainbow Trout: Limitations in Their Use for Prediction of Environmental Residues,"Oliver, B.G., a A.J. Niimi",1985,Environ.Sci.Technol. 19(9):842-849,ClC1=CC=C(Cl)C(Cl)=C1
120-82-1,WB,21,Oncorhynchus mykiss,FT,Cb/Cw,3.278753601,LogBCF (L/kg bdwt),FW,ArnotGobas,Bioconcentration Factors of Some Halogenated Organics for Rainbow Trout: Limitations in Their Use for Prediction of Environmental Residues,"Oliver, B.G., a A.J. Niimi",1985,Environ.Sci.Technol. 19(9):842-849,ClC1=CC=C(Cl)C(Cl)=C1
120-82-1,WB,21,Oncorhynchus mykiss,FT,Cb/Cw,3.602059991,LogBCF (L/kg bdwt),FW,ArnotGobas,Bioconcentration Factors of Some Halogenated Organics for Rainbow Trout: Limitations in Their Use for Prediction of Environmental Residues,"Oliver, B.G., a A.J. Niimi",1985,Environ.Sci.Technol. 19(9):842-849,ClC1=CC=C(Cl)C(Cl)=C1
120-82-1,WB,50,Oncorhynchus mykiss,FT,Cb/Cw,3.748188027,LogBCF (L/kg bdwt),FW,ArnotGobas,Bioconcentration Factors of Some Halogenated Organics for Rainbow Trout: Limitations in Their Use for Prediction of Environmental Residues,"Oliver, B.G., a A.J. Niimi",1985,Environ.Sci.Technol. 19(9):842-849,ClC1=CC=C(Cl)C(Cl)=C1
120-82-1,WB,35,Oncorhynchus mykiss,FT,Cb/Cw,3.716003344,LogBCF (L/kg bdwt),FW,ArnotGobas,Bioconcentration Factors of Some Halogenated Organics for Rainbow Trout: Limitations in Their Use for Prediction of Environmental Residues,"Oliver, B.G., a A.J. Niimi",1985,Environ.Sci.Technol. 19(9):842-849,ClC1=CC=C(Cl)C(Cl)=C1
120-82-1,WB,35,Oncorhynchus mykiss,FT,Cb/Cw,3.643452676,LogBCF (L/kg bdwt),FW,ArnotGobas,Bioconcentration Factors of Some Halogenated Organics for Rainbow Trout: Limitations in Their Use for Prediction of Environmental Residues,"Oliver, B.G., a A.J. Niimi",1985,Environ.Sci.Technol. 19(9):842-849,ClC1=CC=C(Cl)C(Cl)=C1
120-82-1,WB,50,Oncorhynchus mykiss,FT,Cb/Cw,3.342422681,LogBCF (L/kg bdwt),FW,ArnotGobas,Bioconcentration Factors of Some Halogenated Organics for Rainbow Trout: Limitations in Their Use for Prediction of Environmental Residues,"Oliver, B.G., a A.J. Niimi",1985,Environ.Sci.Technol. 19(9):842-849,ClC1=CC=C(Cl)C(Cl)=C1
120-82-1,WB,75,Oncorhynchus mykiss,FT,Cb/Cw,3.361727836,LogBCF (L/kg bdwt),FW,ArnotGobas,Bioconcentration Factors of Some Halogenated Organics for Rainbow Trout: Limitations in Their Use for Prediction of Environmental Residues,"Oliver, B.G., a A.J. Niimi",1985,Environ.Sci.Technol. 19(9):842-849,ClC1=CC=C(Cl)C(Cl)=C1
120-82-1,WB,7,Oncorhynchus mykiss,FT,Cb/Cw,3.176091259,LogBCF (L/kg bdwt),FW,ArnotGobas,Bioconcentration Factors of Some Halogenated Organics for Rainbow Trout: Limitations in Their Use for Prediction of Environmental Residues,"Oliver, B.G., a A.J. Niimi",1985,Environ.Sci.Technol. 19(9):842-849,ClC1=CC=C(Cl)C(Cl)=C1
120-82-1,WB,96,Oncorhynchus mykiss,FT,Cb/Cw,3.380211242,LogBCF (L/kg bdwt),FW,ArnotGobas,Bioconcentration Factors of Some Halogenated Organics for Rainbow Trout: Limitations in Their Use for Prediction of Environmental Residues,"Oliver, B.G., a A.J. Niimi",1985,Environ.Sci.Technol. 19(9):842-849,ClC1=CC=C(Cl)C(Cl)=C1
120-82-1,WB,96,Oncorhynchus mykiss,FT,Cb/Cw,3.255272505,LogBCF (L/kg bdwt),FW,ArnotGobas,Bioconcentration Factors of Some Halogenated Organics for Rainbow Trout: Limitations in Their Use for Prediction of Environmental Residues,"Oliver, B.G., a A.J. Niimi",1985,Environ.Sci.Technol. 19(9):842-849,ClC1=CC=C(Cl)C(Cl)=C1
120-82-1,WB,75,Oncorhynchus mykiss,FT,Cb/Cw,3.146128036,LogBCF (L/kg bdwt),FW,ArnotGobas,Bioconcentration Factors of Some Halogenated Organics for Rainbow Trout: Limitations in Their Use for Prediction of Environmental Residues,"Oliver, B.G., a A.J. Niimi",1985,Environ.Sci.Technol. 19(9):842-849,ClC1=CC=C(Cl)C(Cl)=C1
120-82-1,WB,28,Jordanella floridae,FT,BIOFAC,3.306639441,LogBCF (L/kg bdwt),FW,ArnotGobas,"Bioconcentration Kinetics of Some Chlorinated Benzenes a Chlorinated Phenols in American Flagfish, Jordanella floridae (Goode a Bean)","Smith, A.D., A. Bharath, C. Mallard, D. Orr, L.S. McCarty, a G.W. Ozburn",1990,Chemosphere 20(3-4):379-386,ClC1=CC=C(Cl)C(Cl)=C1
120-82-1,WB,28,Leiostomus xanthurus,FT,K1/K2,2.155336037,LogBCF (L/kg bdwt),SW,ArnotGobas,"Bioaccumulation of 1,2,4-Trichlorobenzene from Food a Water Sources by Spot (Leiostomus xanthurus)","Heitmuller, P.T., a J.R. Clark",1989,"In: U.M.Cowgill a L.R.Williams (Eds.), Aquatic Toxicology a Hazard Assessment, ASTM STP 1027, Philadelphia, PA 12:261-269",ClC1=CC=C(Cl)C(Cl)=C1
120-82-1,WB,28,Leiostomus xanthurus,FT,Cb/Cw,2.130333768,LogBCF (L/kg bdwt),SW,ArnotGobas,"Bioaccumulation of 1,2,4-Trichlorobenzene from Food a Water Sources by Spot (Leiostomus xanthurus)","Heitmuller, P.T., a J.R. Clark",1989,"In: U.M.Cowgill a L.R.Williams (Eds.), Aquatic Toxicology a Hazard Assessment, ASTM STP 1027, Philadelphia, PA 12:261-269",ClC1=CC=C(Cl)C(Cl)=C1
120-82-1,WB,28,Leiostomus xanthurus,FT,K1/K2,1.929418926,LogBCF (L/kg bdwt),SW,ArnotGobas,"Bioaccumulation of 1,2,4-Trichlorobenzene from Food a Water Sources by Spot (Leiostomus xanthurus)","Heitmuller, P.T., a J.R. Clark",1989,"In: U.M.Cowgill a L.R.Williams (Eds.), Aquatic Toxicology a Hazard Assessment, ASTM STP 1027, Philadelphia, PA 12:261-269",ClC1=CC=C(Cl)C(Cl)=C1
120-82-1,WB,21,Leiostomus xanthurus,FT,Cb/Cw,1.838849091,LogBCF (L/kg bdwt),SW,ArnotGobas,"Bioaccumulation of 1,2,4-Trichlorobenzene from Food a Water Sources by Spot (Leiostomus xanthurus)","Heitmuller, P.T., a J.R. Clark",1989,"In: U.M.Cowgill a L.R.Williams (Eds.), Aquatic Toxicology a Hazard Assessment, ASTM STP 1027, Philadelphia, PA 12:261-269",ClC1=CC=C(Cl)C(Cl)=C1
120-82-1,,56,Cyprinus carpio,FT,,3,LogBCF (L/kg bdwt),,ArnotGobas,Biodegradation a Bioaccumulation Test on Chemical Substances.,"Kitano, M.",1978,,ClC1=CC=C(Cl)C(Cl)=C1
121-14-2,WB,3,Poecilia reticulata,Semi-S,Cb/Cw,1.213089987,LogBCF (L/kg bdwt),FW,ArnotGobas,Quantitative Structure-Activity Relationships for the Toxicity a Bioconcentration Factor of Nitrobenzene Derivatives towards the Guppy (Poecilia reticulata).,"Deneer, J.W., T.L. Sinnige, W. Seinen a J.L.M. Hermens",1987,Aquat.Toxicol. 10:115-129,CC1=CC=C(C=C1[N+]([O-])=O)[N+]([O-])=O
121-14-2,WB,40,Cyprinus carpio,R,Cb/Cw,1.167317335,LogBCF (L/kg bdwt),FW,ArnotGobas,"Bioconcentration, Elimination a Metabolism of 2,4-Dinitrotoluene in Carps (Cyprinus carpio L.)","Lang, P.Z., Y. Wang, D.B. Chen, N. Wang, X.M. Zhao, a Y.Z. Ding",1997,Chemosphere 35(8):1799-1815,CC1=CC=C(C=C1[N+]([O-])=O)[N+]([O-])=O
121-14-2,WB,9,Cyprinus carpio,R,Cb/Cw,1.041392685,LogBCF (L/kg bdwt),FW,ArnotGobas,"Bioconcentration, Elimination a Metabolism of 2,4-Dinitrotoluene in Carps (Cyprinus carpio L.)","Lang, P.Z., Y. Wang, D.B. Chen, N. Wang, X.M. Zhao, a Y.Z. Ding",1997,Chemosphere 35(8):1799-1815,CC1=CC=C(C=C1[N+]([O-])=O)[N+]([O-])=O
121-14-2,WB,8,Cyprinus carpio,R,Cb/Cw,0.995635195,LogBCF (L/kg bdwt),FW,ArnotGobas,"Bioconcentration, Elimination a Metabolism of 2,4-Dinitrotoluene in Carps (Cyprinus carpio L.)","Lang, P.Z., Y. Wang, D.B. Chen, N. Wang, X.M. Zhao, a Y.Z. Ding",1997,Chemosphere 35(8):1799-1815,CC1=CC=C(C=C1[N+]([O-])=O)[N+]([O-])=O
121-14-2,WB,3,Cyprinus carpio,R,Cb/Cw,0.963787827,LogBCF (L/kg bdwt),FW,ArnotGobas,"Bioconcentration, Elimination a Metabolism of 2,4-Dinitrotoluene in Carps (Cyprinus carpio L.)","Lang, P.Z., Y. Wang, D.B. Chen, N. Wang, X.M. Zhao, a Y.Z. Ding",1997,Chemosphere 35(8):1799-1815,CC1=CC=C(C=C1[N+]([O-])=O)[N+]([O-])=O
121-14-2,WB,1.5,Cyprinus carpio,R,Cb/Cw,0.959041392,LogBCF (L/kg bdwt),FW,ArnotGobas,"Bioconcentration, Elimination a Metabolism of 2,4-Dinitrotoluene in Carps (Cyprinus carpio L.)","Lang, P.Z., Y. Wang, D.B. Chen, N. Wang, X.M. Zhao, a Y.Z. Ding",1997,Chemosphere 35(8):1799-1815,CC1=CC=C(C=C1[N+]([O-])=O)[N+]([O-])=O
121-14-2,WB,10,Cyprinus carpio,R,Cb/Cw,0.908485019,LogBCF (L/kg bdwt),FW,ArnotGobas,"Bioconcentration, Elimination a Metabolism of 2,4-Dinitrotoluene in Carps (Cyprinus carpio L.)","Lang, P.Z., Y. Wang, D.B. Chen, N. Wang, X.M. Zhao, a Y.Z. Ding",1997,Chemosphere 35(8):1799-1815,CC1=CC=C(C=C1[N+]([O-])=O)[N+]([O-])=O
121-14-2,WB,5,Cyprinus carpio,R,Cb/Cw,0.880813592,LogBCF (L/kg bdwt),FW,ArnotGobas,"Bioconcentration, Elimination a Metabolism of 2,4-Dinitrotoluene in Carps (Cyprinus carpio L.)","Lang, P.Z., Y. Wang, D.B. Chen, N. Wang, X.M. Zhao, a Y.Z. Ding",1997,Chemosphere 35(8):1799-1815,CC1=CC=C(C=C1[N+]([O-])=O)[N+]([O-])=O
121-14-2,WB,14,Cyprinus carpio,R,Cb/Cw,0.832508913,LogBCF (L/kg bdwt),FW,ArnotGobas,"Bioconcentration, Elimination a Metabolism of 2,4-Dinitrotoluene in Carps (Cyprinus carpio L.)","Lang, P.Z., Y. Wang, D.B. Chen, N. Wang, X.M. Zhao, a Y.Z. Ding",1997,Chemosphere 35(8):1799-1815,CC1=CC=C(C=C1[N+]([O-])=O)[N+]([O-])=O
121-14-2,WB,11,Cyprinus carpio,R,Cb/Cw,0.740362689,LogBCF (L/kg bdwt),FW,ArnotGobas,"Bioconcentration, Elimination a Metabolism of 2,4-Dinitrotoluene in Carps (Cyprinus carpio L.)","Lang, P.Z., Y. Wang, D.B. Chen, N. Wang, X.M. Zhao, a Y.Z. Ding",1997,Chemosphere 35(8):1799-1815,CC1=CC=C(C=C1[N+]([O-])=O)[N+]([O-])=O
121-14-2,WB,12,Cyprinus carpio,R,Cb/Cw,0.633468456,LogBCF (L/kg bdwt),FW,ArnotGobas,"Bioconcentration, Elimination a Metabolism of 2,4-Dinitrotoluene in Carps (Cyprinus carpio L.)","Lang, P.Z., Y. Wang, D.B. Chen, N. Wang, X.M. Zhao, a Y.Z. Ding",1997,Chemosphere 35(8):1799-1815,CC1=CC=C(C=C1[N+]([O-])=O)[N+]([O-])=O
121-14-2,WB,19,Cyprinus carpio,R,Cb/Cw,0.62324929,LogBCF (L/kg bdwt),FW,ArnotGobas,"Bioconcentration, Elimination a Metabolism of 2,4-Dinitrotoluene in Carps (Cyprinus carpio L.)","Lang, P.Z., Y. Wang, D.B. Chen, N. Wang, X.M. Zhao, a Y.Z. Ding",1997,Chemosphere 35(8):1799-1815,CC1=CC=C(C=C1[N+]([O-])=O)[N+]([O-])=O
121-14-2,WB,29,Cyprinus carpio,R,Cb/Cw,0.544068044,LogBCF (L/kg bdwt),FW,ArnotGobas,"Bioconcentration, Elimination a Metabolism of 2,4-Dinitrotoluene in Carps (Cyprinus carpio L.)","Lang, P.Z., Y. Wang, D.B. Chen, N. Wang, X.M. Zhao, a Y.Z. Ding",1997,Chemosphere 35(8):1799-1815,CC1=CC=C(C=C1[N+]([O-])=O)[N+]([O-])=O
121-14-2,WB,16,Cyprinus carpio,R,Cb/Cw,0.531478917,LogBCF (L/kg bdwt),FW,ArnotGobas,"Bioconcentration, Elimination a Metabolism of 2,4-Dinitrotoluene in Carps (Cyprinus carpio L.)","Lang, P.Z., Y. Wang, D.B. Chen, N. Wang, X.M. Zhao, a Y.Z. Ding",1997,Chemosphere 35(8):1799-1815,CC1=CC=C(C=C1[N+]([O-])=O)[N+]([O-])=O
121-14-2,WB,24,Cyprinus carpio,R,Cb/Cw,0.414973348,LogBCF (L/kg bdwt),FW,ArnotGobas,"Bioconcentration, Elimination a Metabolism of 2,4-Dinitrotoluene in Carps (Cyprinus carpio L.)","Lang, P.Z., Y. Wang, D.B. Chen, N. Wang, X.M. Zhao, a Y.Z. Ding",1997,Chemosphere 35(8):1799-1815,CC1=CC=C(C=C1[N+]([O-])=O)[N+]([O-])=O
1212-29-9,WB,42,Cyprinus carpio,FT,Cb/Cw,0.64,LogBCF (L/kg bdwt),,ArnotGobas,Biodegradation a Bioconcentration of Existing Chemical Substances uer the Chemical Substances Control Law,Chemicals Evaluation a Research Institute,1992,http://qsar.cerij.or.jp/cgi-bin/DEGACC/iex.cgie,S=C(NC1CCCCC1)NC1CCCCC1
1212-29-9,WB,42,Cyprinus carpio,FT,Cb/Cw,0.554303586,LogBCF (L/kg bdwt),,ArnotGobas,Biodegradation a Bioconcentration of Existing Chemical Substances uer the Chemical Substances Control Law,Chemicals Evaluation a Research Institute,1992,http://qsar.cerij.or.jp/cgi-bin/DEGACC/iex.cgie,S=C(NC1CCCCC1)NC1CCCCC1
121-73-3,WB,36,Oncorhynchus mykiss,FT,Cb/Cw,1.959041392,LogBCF (L/kg bdwt),FW,ArnotGobas,Octanol/Water Partition Coefficients a Bioconcentration Factors of Chloronitrobenzenes in Rainbow Trout (Salmo gairdneri),"Niimi, A.J., H.B. Lee, a G.P. Kissoon",1989,Environ.Toxicol.Chem. 8(9):817-823,[O-][N+](=O)C1=CC=CC(Cl)=C1
121-73-3,WB,12,Oncorhynchus mykiss,FT,Cb/Cw,1.944482672,LogBCF (L/kg bdwt),FW,ArnotGobas,Octanol/Water Partition Coefficients a Bioconcentration Factors of Chloronitrobenzenes in Rainbow Trout (Salmo gairdneri),"Niimi, A.J., H.B. Lee, a G.P. Kissoon",1989,Environ.Toxicol.Chem. 8(9):817-823,[O-][N+](=O)C1=CC=CC(Cl)=C1
121-73-3,WB,5,Oncorhynchus mykiss,FT,Cb/Cw,1.886490725,LogBCF (L/kg bdwt),FW,ArnotGobas,Octanol/Water Partition Coefficients a Bioconcentration Factors of Chloronitrobenzenes in Rainbow Trout (Salmo gairdneri),"Niimi, A.J., H.B. Lee, a G.P. Kissoon",1989,Environ.Toxicol.Chem. 8(9):817-823,[O-][N+](=O)C1=CC=CC(Cl)=C1
121-73-3,WB,20,Oncorhynchus mykiss,FT,Cb/Cw,1.838849091,LogBCF (L/kg bdwt),FW,ArnotGobas,Octanol/Water Partition Coefficients a Bioconcentration Factors of Chloronitrobenzenes in Rainbow Trout (Salmo gairdneri),"Niimi, A.J., H.B. Lee, a G.P. Kissoon",1989,Environ.Toxicol.Chem. 8(9):817-823,[O-][N+](=O)C1=CC=CC(Cl)=C1
121-73-3,WB,28,Oncorhynchus mykiss,FT,Cb/Cw,1.806179974,LogBCF (L/kg bdwt),FW,ArnotGobas,Octanol/Water Partition Coefficients a Bioconcentration Factors of Chloronitrobenzenes in Rainbow Trout (Salmo gairdneri),"Niimi, A.J., H.B. Lee, a G.P. Kissoon",1989,Environ.Toxicol.Chem. 8(9):817-823,[O-][N+](=O)C1=CC=CC(Cl)=C1
121-75-5,WB,0.5,Gnathopogon coerulescens,FT,Cb/Cw,1.389166084,LogBCF (L/kg bdwt),FW,ArnotGobas,"Bioconcentration a Excretion of Diazinon, IBP, Malathion a Fenitrothion by Willow Shiner","Tsuda, T., S. Aoki, M. Kojima, a H. Harada",1989,Toxicol.Environ.Chem. 24:185-190,CCOC(=O)CC(SP(=S)(OC)OC)C(=O)OCC
121-75-5,WB,3,Pseudorasbora parva,S,K1/K2,0.301029996,LogBCF (L/kg bdwt),FW,ArnotGobas,"Uptake a Excretion of Organophosphorus a Carbamate Insecticides by Fresh Water Fish, Motsugo, Pseudorasbora parva","Kanazawa, J.",1975,Bull.Environ.Contam.Toxicol. 14(3):346-352,CCOC(=O)CC(SP(=S)(OC)OC)C(=O)OCC
121-75-5,WB,7,Oryzias latipes,FT,Cb/Cw,1.079181246,LogBCF (L/kg bdwt),FW,ArnotGobas,"Acute Toxicity, Accumulation a Excretion of Organophosphorous Insecticides a Their Oxidation Products in Killifish","Tsuda, T., M. Kojima, H. Harada, A. Nakajima, a S. Aoki",1997,Chemosphere 35(5):939-949,CCOC(=O)CC(SP(=S)(OC)OC)C(=O)OCC
121-75-5,WB,1,Oryzias latipes,FT,Cb/Cw,1.041392685,LogBCF (L/kg bdwt),FW,ArnotGobas,"Acute Toxicity, Accumulation a Excretion of Organophosphorous Insecticides a Their Oxidation Products in Killifish","Tsuda, T., M. Kojima, H. Harada, A. Nakajima, a S. Aoki",1997,Chemosphere 35(5):939-949,CCOC(=O)CC(SP(=S)(OC)OC)C(=O)OCC
121-75-5,WB,5,Oryzias latipes,FT,Cb/Cw,1.041392685,LogBCF (L/kg bdwt),FW,ArnotGobas,"Acute Toxicity, Accumulation a Excretion of Organophosphorous Insecticides a Their Oxidation Products in Killifish","Tsuda, T., M. Kojima, H. Harada, A. Nakajima, a S. Aoki",1997,Chemosphere 35(5):939-949,CCOC(=O)CC(SP(=S)(OC)OC)C(=O)OCC
121-75-5,WB,2,Oryzias latipes,FT,Cb/Cw,1,LogBCF (L/kg bdwt),FW,ArnotGobas,"Acute Toxicity, Accumulation a Excretion of Organophosphorous Insecticides a Their Oxidation Products in Killifish","Tsuda, T., M. Kojima, H. Harada, A. Nakajima, a S. Aoki",1997,Chemosphere 35(5):939-949,CCOC(=O)CC(SP(=S)(OC)OC)C(=O)OCC
121-75-5,WB,3,Oryzias latipes,FT,Cb/Cw,0.995635195,LogBCF (L/kg bdwt),FW,ArnotGobas,"Acute Toxicity, Accumulation a Excretion of Organophosphorous Insecticides a Their Oxidation Products in Killifish","Tsuda, T., M. Kojima, H. Harada, A. Nakajima, a S. Aoki",1997,Chemosphere 35(5):939-949,CCOC(=O)CC(SP(=S)(OC)OC)C(=O)OCC
121-75-5,WB,0.5,Oryzias latipes,FT,Cb/Cw,0.86923172,LogBCF (L/kg bdwt),FW,ArnotGobas,"Acute Toxicity, Accumulation a Excretion of Organophosphorous Insecticides a Their Oxidation Products in Killifish","Tsuda, T., M. Kojima, H. Harada, A. Nakajima, a S. Aoki",1997,Chemosphere 35(5):939-949,CCOC(=O)CC(SP(=S)(OC)OC)C(=O)OCC
121-75-5,WB,0.25,Oryzias latipes,FT,Cb/Cw,0.716003344,LogBCF (L/kg bdwt),FW,ArnotGobas,"Acute Toxicity, Accumulation a Excretion of Organophosphorous Insecticides a Their Oxidation Products in Killifish","Tsuda, T., M. Kojima, H. Harada, A. Nakajima, a S. Aoki",1997,Chemosphere 35(5):939-949,CCOC(=O)CC(SP(=S)(OC)OC)C(=O)OCC
121-75-5,WB,7,Gnathopogon coerulescens,FT,Cb/Cw,1.5774918,LogBCF (L/kg bdwt),FW,ArnotGobas,"Bioconcentration a Excretion of Diazinon, IBP, Malathion a Fenitrothion by Willow Shiner","Tsuda, T., S. Aoki, M. Kojima, a H. Harada",1989,Toxicol.Environ.Chem. 24:185-190,CCOC(=O)CC(SP(=S)(OC)OC)C(=O)OCC
121-75-5,WB,1,Gnathopogon coerulescens,FT,Cb/Cw,1.564666064,LogBCF (L/kg bdwt),FW,ArnotGobas,"Bioconcentration a Excretion of Diazinon, IBP, Malathion a Fenitrothion by Willow Shiner","Tsuda, T., S. Aoki, M. Kojima, a H. Harada",1989,Toxicol.Environ.Chem. 24:185-190,CCOC(=O)CC(SP(=S)(OC)OC)C(=O)OCC
121-75-5,WB,3,Gnathopogon coerulescens,FT,Cb/Cw,1.514547753,LogBCF (L/kg bdwt),FW,ArnotGobas,"Bioconcentration a Excretion of Diazinon, IBP, Malathion a Fenitrothion by Willow Shiner","Tsuda, T., S. Aoki, M. Kojima, a H. Harada",1989,Toxicol.Environ.Chem. 24:185-190,CCOC(=O)CC(SP(=S)(OC)OC)C(=O)OCC
121-75-5,WB,2,Gnathopogon coerulescens,FT,Cb/Cw,1.484299839,LogBCF (L/kg bdwt),FW,ArnotGobas,"Bioconcentration a Excretion of Diazinon, IBP, Malathion a Fenitrothion by Willow Shiner","Tsuda, T., S. Aoki, M. Kojima, a H. Harada",1989,Toxicol.Environ.Chem. 24:185-190,CCOC(=O)CC(SP(=S)(OC)OC)C(=O)OCC
121-75-5,WB,0.25,Gnathopogon coerulescens,FT,Cb/Cw,0.977723605,LogBCF (L/kg bdwt),FW,ArnotGobas,"Bioconcentration a Excretion of Diazinon, IBP, Malathion a Fenitrothion by Willow Shiner","Tsuda, T., S. Aoki, M. Kojima, a H. Harada",1989,Toxicol.Environ.Chem. 24:185-190,CCOC(=O)CC(SP(=S)(OC)OC)C(=O)OCC
121-82-4,WB,0.375,Ictalurus punctatus,R,K1/K2,0.301029996,LogBCF (L/kg bdwt),FW,ArnotGobas,"Accumulation of hexahydro-1,3,5-trinitro-1,3,5-triazine in channel catfish (Ictalurus punctatus) a aquatic oligochaetes (Lumbriculus variegatus)","Belden, J.B., Lotufo, G.R. a Lydy, M.J.",2005,Environmental Toxicology a Chemistry 24(8):1962-1967,[O-][N+](=O)N1CN(CN(C1)[N+]([O-])=O)[N+]([O-])=O
121-82-4,WB,0.375,Ictalurus punctatus,R,Cb/Cw,0.301029996,LogBCF (L/kg bdwt),FW,ArnotGobas,"Accumulation of hexahydro-1,3,5-trinitro-1,3,5-triazine in channel catfish (Ictalurus punctatus) a aquatic oligochaetes (Lumbriculus variegatus)","Belden, J.B., Lotufo, G.R. a Lydy, M.J.",2005,Environmental Toxicology a Chemistry 24(8):1962-1967,[O-][N+](=O)N1CN(CN(C1)[N+]([O-])=O)[N+]([O-])=O
122-14-5,WB,7.01,Poecilia reticulata,FT,Cb/Cw,2.304318154,LogBCF (L/kg bdwt),FW,ArnotGobas,Uptake a Elimination Kinetics of Organophosphorous Pesticides in the Guppy (Poecilia reticulata): Correlations with the Octanol/Water Partition,"De Bruijn, J., a J. Hermens",1991,Environ.Toxicol.Chem. 10(6):791-804,COP(=S)(OC)OC1=CC=C(C(C)=C1)[N+]([O-])=O
122-14-5,WB,7.5,Pseudorasbora parva,FT,Cb/Cw,2.390935107,LogBCF (L/kg bdwt),FW,ArnotGobas,Measurement of the Bioconcentration Factors of Pesticides by Freshwater Fish a Their Correlation with Physicochemical Properties or Acute Toxicities,"Kanazawa, J.",1981,Pestic.Sci. 12(4):417-424,COP(=S)(OC)OC1=CC=C(C(C)=C1)[N+]([O-])=O
122-14-5,WB,28,Pseudorasbora parva,S,K1/K2,2.311753861,LogBCF (L/kg bdwt),FW,ArnotGobas,"Uptake a Excretion of Organophosphorus a Carbamate Insecticides by Fresh Water Fish, Motsugo, Pseudorasbora parva","Kanazawa, J.",1975,Bull.Environ.Contam.Toxicol. 14(3):346-352,COP(=S)(OC)OC1=CC=C(C(C)=C1)[N+]([O-])=O
122-14-5,WB,5,Poecilia reticulata,FT,Cb/Cw,2.176091259,LogBCF (L/kg bdwt),FW,ArnotGobas,Relationships of Bioconcentration Factors of Organophosphate Pesticides Among Species of Fish,"Tsuda, T., M. Kojima, H. Harada, A. Nakajima, a S. Aoki",1997,Comp.Biochem.Physiol.C 116(3):213-218,COP(=S)(OC)OC1=CC=C(C(C)=C1)[N+]([O-])=O
122-14-5,WB,3,Poecilia reticulata,FT,Cb/Cw,2.149219113,LogBCF (L/kg bdwt),FW,ArnotGobas,Relationships of Bioconcentration Factors of Organophosphate Pesticides Among Species of Fish,"Tsuda, T., M. Kojima, H. Harada, A. Nakajima, a S. Aoki",1997,Comp.Biochem.Physiol.C 116(3):213-218,COP(=S)(OC)OC1=CC=C(C(C)=C1)[N+]([O-])=O
122-14-5,WB,1,Oryzias latipes,FT,Cb/Cw,2.133538908,LogBCF (L/kg bdwt),FW,ArnotGobas,"Acute Toxicity, Accumulation a Excretion of Organophosphorous Insecticides a Their Oxidation Products in Killifish","Tsuda, T., M. Kojima, H. Harada, A. Nakajima, a S. Aoki",1997,Chemosphere 35(5):939-949,COP(=S)(OC)OC1=CC=C(C(C)=C1)[N+]([O-])=O
122-14-5,WB,7.01,Poecilia reticulata,FT,Cb/Cw,2.117271296,LogBCF (L/kg bdwt),FW,ArnotGobas,Relationships of Bioconcentration Factors of Organophosphate Pesticides Among Species of Fish,"Tsuda, T., M. Kojima, H. Harada, A. Nakajima, a S. Aoki",1997,Comp.Biochem.Physiol.C 116(3):213-218,COP(=S)(OC)OC1=CC=C(C(C)=C1)[N+]([O-])=O
122-14-5,,2,Oryzias latipes,FT,Cb/Cw,2.127104798,LogBCF (L/kg bdwt),FW,ArnotGobas,"Acute Toxicity, Accumulation a Excretion of Organophosphorous Insecticides a Their Oxidation Products in Killifish","Tsuda, T., M. Kojima, H. Harada, A. Nakajima, a S. Aoki",1997,Chemosphere 35(5):939-949,COP(=S)(OC)OC1=CC=C(C(C)=C1)[N+]([O-])=O
122-14-5,,3,Oryzias latipes,FT,Cb/Cw,2.120573931,LogBCF (L/kg bdwt),FW,ArnotGobas,"Acute Toxicity, Accumulation a Excretion of Organophosphorous Insecticides a Their Oxidation Products in Killifish","Tsuda, T., M. Kojima, H. Harada, A. Nakajima, a S. Aoki",1997,Chemosphere 35(5):939-949,COP(=S)(OC)OC1=CC=C(C(C)=C1)[N+]([O-])=O
122-14-5,,5,Oryzias latipes,FT,Cb/Cw,2.093421685,LogBCF (L/kg bdwt),FW,ArnotGobas,"Acute Toxicity, Accumulation a Excretion of Organophosphorous Insecticides a Their Oxidation Products in Killifish","Tsuda, T., M. Kojima, H. Harada, A. Nakajima, a S. Aoki",1997,Chemosphere 35(5):939-949,COP(=S)(OC)OC1=CC=C(C(C)=C1)[N+]([O-])=O
122-14-5,WB,5,Poecilia reticulata,FT,Cb/Cw,2.096910013,LogBCF (L/kg bdwt),FW,ArnotGobas,Relationships of Bioconcentration Factors of Organophosphate Pesticides Among Species of Fish,"Tsuda, T., M. Kojima, H. Harada, A. Nakajima, a S. Aoki",1997,Comp.Biochem.Physiol.C 116(3):213-218,COP(=S)(OC)OC1=CC=C(C(C)=C1)[N+]([O-])=O
122-14-5,WB,0.5,Poecilia reticulata,FT,Cb/Cw,1.926342447,LogBCF (L/kg bdwt),FW,ArnotGobas,Relationships of Bioconcentration Factors of Organophosphate Pesticides Among Species of Fish,"Tsuda, T., M. Kojima, H. Harada, A. Nakajima, a S. Aoki",1997,Comp.Biochem.Physiol.C 116(3):213-218,COP(=S)(OC)OC1=CC=C(C(C)=C1)[N+]([O-])=O
122-14-5,,7.01,Oryzias latipes,FT,Cb/Cw,1.924279286,LogBCF (L/kg bdwt),FW,ArnotGobas,"Acute Toxicity, Accumulation a Excretion of Organophosphorous Insecticides a Their Oxidation Products in Killifish","Tsuda, T., M. Kojima, H. Harada, A. Nakajima, a S. Aoki",1997,Chemosphere 35(5):939-949,COP(=S)(OC)OC1=CC=C(C(C)=C1)[N+]([O-])=O
122-14-5,WB,3,Oryzias latipes,FT,Cb/Cw,1.697229343,LogBCF (L/kg bdwt),FW,ArnotGobas,Relationships of Bioconcentration Factors of Organophosphate Pesticides Among Species of Fish,"Tsuda, T., M. Kojima, H. Harada, A. Nakajima, a S. Aoki",1997,Comp.Biochem.Physiol.C 116(3):213-218,COP(=S)(OC)OC1=CC=C(C(C)=C1)[N+]([O-])=O
122-14-5,WB,0.5,Poecilia reticulata,FT,Cb/Cw,1.837588438,LogBCF (L/kg bdwt),FW,ArnotGobas,Relationships of Bioconcentration Factors of Organophosphate Pesticides Among Species of Fish,"Tsuda, T., M. Kojima, H. Harada, A. Nakajima, a S. Aoki",1997,Comp.Biochem.Physiol.C 116(3):213-218,COP(=S)(OC)OC1=CC=C(C(C)=C1)[N+]([O-])=O
122-14-5,WB,1,Poecilia reticulata,FT,Cb/Cw,1.790285164,LogBCF (L/kg bdwt),FW,ArnotGobas,Relationships of Bioconcentration Factors of Organophosphate Pesticides Among Species of Fish,"Tsuda, T., M. Kojima, H. Harada, A. Nakajima, a S. Aoki",1997,Comp.Biochem.Physiol.C 116(3):213-218,COP(=S)(OC)OC1=CC=C(C(C)=C1)[N+]([O-])=O
122-14-5,WB,0.25,Carassius auratus,FT,Cb/Cw,1.622214023,LogBCF (L/kg bdwt),FW,ArnotGobas,Relationships of Bioconcentration Factors of Organophosphate Pesticides Among Species of Fish,"Tsuda, T., M. Kojima, H. Harada, A. Nakajima, a S. Aoki",1997,Comp.Biochem.Physiol.C 116(3):213-218,COP(=S)(OC)OC1=CC=C(C(C)=C1)[N+]([O-])=O
122-14-5,WB,0.25,Poecilia reticulata,FT,Cb/Cw,1.789580712,LogBCF (L/kg bdwt),FW,ArnotGobas,Relationships of Bioconcentration Factors of Organophosphate Pesticides Among Species of Fish,"Tsuda, T., M. Kojima, H. Harada, A. Nakajima, a S. Aoki",1997,Comp.Biochem.Physiol.C 116(3):213-218,COP(=S)(OC)OC1=CC=C(C(C)=C1)[N+]([O-])=O
122-14-5,WB,0.5,Oryzias latipes,FT,Cb/Cw,1.622214023,LogBCF (L/kg bdwt),FW,ArnotGobas,Relationships of Bioconcentration Factors of Organophosphate Pesticides Among Species of Fish,"Tsuda, T., M. Kojima, H. Harada, A. Nakajima, a S. Aoki",1997,Comp.Biochem.Physiol.C 116(3):213-218,COP(=S)(OC)OC1=CC=C(C(C)=C1)[N+]([O-])=O
122-14-5,WB,3,Poecilia reticulata,FT,Cb/Cw,1.752048448,LogBCF (L/kg bdwt),FW,ArnotGobas,Relationships of Bioconcentration Factors of Organophosphate Pesticides Among Species of Fish,"Tsuda, T., M. Kojima, H. Harada, A. Nakajima, a S. Aoki",1997,Comp.Biochem.Physiol.C 116(3):213-218,COP(=S)(OC)OC1=CC=C(C(C)=C1)[N+]([O-])=O
122-14-5,WB,1,Poecilia reticulata,FT,Cb/Cw,1.745855195,LogBCF (L/kg bdwt),FW,ArnotGobas,Relationships of Bioconcentration Factors of Organophosphate Pesticides Among Species of Fish,"Tsuda, T., M. Kojima, H. Harada, A. Nakajima, a S. Aoki",1997,Comp.Biochem.Physiol.C 116(3):213-218,COP(=S)(OC)OC1=CC=C(C(C)=C1)[N+]([O-])=O
122-14-5,WB,7.01,Carassius auratus,FT,Cb/Cw,1.537819095,LogBCF (L/kg bdwt),FW,ArnotGobas,Relationships of Bioconcentration Factors of Organophosphate Pesticides Among Species of Fish,"Tsuda, T., M. Kojima, H. Harada, A. Nakajima, a S. Aoki",1997,Comp.Biochem.Physiol.C 116(3):213-218,COP(=S)(OC)OC1=CC=C(C(C)=C1)[N+]([O-])=O
122-14-5,WB,0.25,Poecilia reticulata,FT,Cb/Cw,1.657055853,LogBCF (L/kg bdwt),FW,ArnotGobas,Relationships of Bioconcentration Factors of Organophosphate Pesticides Among Species of Fish,"Tsuda, T., M. Kojima, H. Harada, A. Nakajima, a S. Aoki",1997,Comp.Biochem.Physiol.C 116(3):213-218,COP(=S)(OC)OC1=CC=C(C(C)=C1)[N+]([O-])=O
122-14-5,WB,1,Oryzias latipes,FT,Cb/Cw,1.541579244,LogBCF (L/kg bdwt),FW,ArnotGobas,Relationships of Bioconcentration Factors of Organophosphate Pesticides Among Species of Fish,"Tsuda, T., M. Kojima, H. Harada, A. Nakajima, a S. Aoki",1997,Comp.Biochem.Physiol.C 116(3):213-218,COP(=S)(OC)OC1=CC=C(C(C)=C1)[N+]([O-])=O
122-14-5,WB,7.01,Poecilia reticulata,FT,Cb/Cw,1.635483747,LogBCF (L/kg bdwt),FW,ArnotGobas,Relationships of Bioconcentration Factors of Organophosphate Pesticides Among Species of Fish,"Tsuda, T., M. Kojima, H. Harada, A. Nakajima, a S. Aoki",1997,Comp.Biochem.Physiol.C 116(3):213-218,COP(=S)(OC)OC1=CC=C(C(C)=C1)[N+]([O-])=O
122-14-5,WB,0.25,Oryzias latipes,FT,Cb/Cw,1.530199698,LogBCF (L/kg bdwt),FW,ArnotGobas,Relationships of Bioconcentration Factors of Organophosphate Pesticides Among Species of Fish,"Tsuda, T., M. Kojima, H. Harada, A. Nakajima, a S. Aoki",1997,Comp.Biochem.Physiol.C 116(3):213-218,COP(=S)(OC)OC1=CC=C(C(C)=C1)[N+]([O-])=O
122-14-5,WB,1,Tanichthys albonubes,FT,Cb/Cw,1.53529412,LogBCF (L/kg bdwt),FW,ArnotGobas,Relationships of Bioconcentration Factors of Organophosphate Pesticides Among Species of Fish,"Tsuda, T., M. Kojima, H. Harada, A. Nakajima, a S. Aoki",1997,Comp.Biochem.Physiol.C 116(3):213-218,COP(=S)(OC)OC1=CC=C(C(C)=C1)[N+]([O-])=O
122-14-5,WB,7.01,Oryzias latipes,FT,Cb/Cw,1.432969291,LogBCF (L/kg bdwt),FW,ArnotGobas,Relationships of Bioconcentration Factors of Organophosphate Pesticides Among Species of Fish,"Tsuda, T., M. Kojima, H. Harada, A. Nakajima, a S. Aoki",1997,Comp.Biochem.Physiol.C 116(3):213-218,COP(=S)(OC)OC1=CC=C(C(C)=C1)[N+]([O-])=O
122-14-5,WB,1,Carassius auratus,FT,Cb/Cw,1.309630167,LogBCF (L/kg bdwt),FW,ArnotGobas,Relationships of Bioconcentration Factors of Organophosphate Pesticides Among Species of Fish,"Tsuda, T., M. Kojima, H. Harada, A. Nakajima, a S. Aoki",1997,Comp.Biochem.Physiol.C 116(3):213-218,COP(=S)(OC)OC1=CC=C(C(C)=C1)[N+]([O-])=O
122-14-5,WB,0.5,Carassius auratus,FT,Cb/Cw,1.281033367,LogBCF (L/kg bdwt),FW,ArnotGobas,Relationships of Bioconcentration Factors of Organophosphate Pesticides Among Species of Fish,"Tsuda, T., M. Kojima, H. Harada, A. Nakajima, a S. Aoki",1997,Comp.Biochem.Physiol.C 116(3):213-218,COP(=S)(OC)OC1=CC=C(C(C)=C1)[N+]([O-])=O
122-14-5,WB,3,Tanichthys albonubes,FT,Cb/Cw,1.436162647,LogBCF (L/kg bdwt),FW,ArnotGobas,Relationships of Bioconcentration Factors of Organophosphate Pesticides Among Species of Fish,"Tsuda, T., M. Kojima, H. Harada, A. Nakajima, a S. Aoki",1997,Comp.Biochem.Physiol.C 116(3):213-218,COP(=S)(OC)OC1=CC=C(C(C)=C1)[N+]([O-])=O
122-14-5,WB,5,Carassius auratus,FT,Cb/Cw,1.209515015,LogBCF (L/kg bdwt),FW,ArnotGobas,Relationships of Bioconcentration Factors of Organophosphate Pesticides Among Species of Fish,"Tsuda, T., M. Kojima, H. Harada, A. Nakajima, a S. Aoki",1997,Comp.Biochem.Physiol.C 116(3):213-218,COP(=S)(OC)OC1=CC=C(C(C)=C1)[N+]([O-])=O
122-14-5,WB,3,Carassius auratus,FT,Cb/Cw,1.184691431,LogBCF (L/kg bdwt),FW,ArnotGobas,Relationships of Bioconcentration Factors of Organophosphate Pesticides Among Species of Fish,"Tsuda, T., M. Kojima, H. Harada, A. Nakajima, a S. Aoki",1997,Comp.Biochem.Physiol.C 116(3):213-218,COP(=S)(OC)OC1=CC=C(C(C)=C1)[N+]([O-])=O
122-14-5,WB,0.25,Tanichthys albonubes,FT,Cb/Cw,1.161368002,LogBCF (L/kg bdwt),FW,ArnotGobas,Relationships of Bioconcentration Factors of Organophosphate Pesticides Among Species of Fish,"Tsuda, T., M. Kojima, H. Harada, A. Nakajima, a S. Aoki",1997,Comp.Biochem.Physiol.C 116(3):213-218,COP(=S)(OC)OC1=CC=C(C(C)=C1)[N+]([O-])=O
122-14-5,WB,0.5,Tanichthys albonubes,FT,Cb/Cw,1.1430148,LogBCF (L/kg bdwt),FW,ArnotGobas,Relationships of Bioconcentration Factors of Organophosphate Pesticides Among Species of Fish,"Tsuda, T., M. Kojima, H. Harada, A. Nakajima, a S. Aoki",1997,Comp.Biochem.Physiol.C 116(3):213-218,COP(=S)(OC)OC1=CC=C(C(C)=C1)[N+]([O-])=O
122-14-5,WB,2.5,Oryzias latipes,FT,Cb/Cw,1.681241237,LogBCF (L/kg bdwt),FW,ArnotGobas,"Accumulation a Excretion of Diazinon, Fenthion a Fenitrothion by Killifish: Comparison of Iividual a Mixed Pesticides","Tsuda, T., S. Aoki, T. Inoue, a M. Kojima",1995,Water Res. 29(2):455-458,COP(=S)(OC)OC1=CC=C(C(C)=C1)[N+]([O-])=O
122-14-5,WB,56,Cyprinus carpio,FT,Cb/Cw,1.715346647,LogBCF (L/kg bdwt),,ArnotGobas,Biodegradation a Bioconcentration of Existing Chemical Substances uer the Chemical Substances Control Law,Chemicals Evaluation a Research Institute,1992,http://qsar.cerij.or.jp/cgi-bin/DEGACC/iex.cgie,COP(=S)(OC)OC1=CC=C(C(C)=C1)[N+]([O-])=O
122-14-5,WB,56,Cyprinus carpio,FT,Cb/Cw,1.488878161,LogBCF (L/kg bdwt),,ArnotGobas,Biodegradation a Bioconcentration of Existing Chemical Substances uer the Chemical Substances Control Law,Chemicals Evaluation a Research Institute,1992,http://qsar.cerij.or.jp/cgi-bin/DEGACC/iex.cgie,COP(=S)(OC)OC1=CC=C(C(C)=C1)[N+]([O-])=O
12217-77-5,WB,42,Cyprinus carpio,FT,Cb/Cw,1.292745925,LogBCF (L/kg bdwt),,ArnotGobas,Biodegradation a Bioconcentration of Existing Chemical Substances uer the Chemical Substances Control Law,Chemicals Evaluation a Research Institute,1992,http://qsar.cerij.or.jp/cgi-bin/DEGACC/iex.cgie,OC1=CC=C(NC2=CC=CC=C2)C2=C1C(=O)C1=C(C2=O)C(=CC=C1O)[N+]([O-])=O
122-34-9,WB,42,Cyprinus carpio,FT,Cb/Cw,1.083265519,LogBCF (L/kg bdwt),,ArnotGobas,Biodegradation a Bioconcentration of Existing Chemical Substances uer the Chemical Substances Control Law,Chemicals Evaluation a Research Institute,1992,http://qsar.cerij.or.jp/cgi-bin/DEGACC/iex.cgie,CCNC1=NC(NCC)=NC(Cl)=N1
122-34-9,WB,42,Cyprinus carpio,FT,Cb/Cw,0.441444085,LogBCF (L/kg bdwt),,ArnotGobas,Biodegradation a Bioconcentration of Existing Chemical Substances uer the Chemical Substances Control Law,Chemicals Evaluation a Research Institute,1992,http://qsar.cerij.or.jp/cgi-bin/DEGACC/iex.cgie,CCNC1=NC(NCC)=NC(Cl)=N1
122-34-9,WB,1,Gnathopogon caerulescens,FT,Cb/Cw,1.380211242,LogBCF (L/kg bdwt),FW,ArnotGobas,Accumulation a Excretion of Pesticides Used in Golf-Courses by Carp (Cyprinus carpio) a Willow Shiner (Gnathopogon caerulescens).,"Tsuda, T., S. Aoki, M. Kojima, a T. Fujita",1992,Comp.Biochem.Physiol.C 101(1):63-66,CCNC1=NC(NCC)=NC(Cl)=N1
122-34-9,WB,3,Gnathopogon caerulescens,FT,Cb/Cw,1.301029996,LogBCF (L/kg bdwt),FW,ArnotGobas,Accumulation a Excretion of Pesticides Used in Golf-Courses by Carp (Cyprinus carpio) a Willow Shiner (Gnathopogon caerulescens).,"Tsuda, T., S. Aoki, M. Kojima, a T. Fujita",1992,Comp.Biochem.Physiol.C 101(1):63-66,CCNC1=NC(NCC)=NC(Cl)=N1
122-34-9,WB,14,Gnathopogon caerulescens,FT,Cb/Cw,1.278753601,LogBCF (L/kg bdwt),FW,ArnotGobas,Accumulation a Excretion of Pesticides Used in Golf-Courses by Carp (Cyprinus carpio) a Willow Shiner (Gnathopogon caerulescens).,"Tsuda, T., S. Aoki, M. Kojima, a T. Fujita",1992,Comp.Biochem.Physiol.C 101(1):63-66,CCNC1=NC(NCC)=NC(Cl)=N1
122-34-9,WB,10,Gnathopogon caerulescens,FT,Cb/Cw,1.146128036,LogBCF (L/kg bdwt),FW,ArnotGobas,Accumulation a Excretion of Pesticides Used in Golf-Courses by Carp (Cyprinus carpio) a Willow Shiner (Gnathopogon caerulescens).,"Tsuda, T., S. Aoki, M. Kojima, a T. Fujita",1992,Comp.Biochem.Physiol.C 101(1):63-66,CCNC1=NC(NCC)=NC(Cl)=N1
122-34-9,WB,7,Gnathopogon caerulescens,FT,Cb/Cw,1.113943352,LogBCF (L/kg bdwt),FW,ArnotGobas,Accumulation a Excretion of Pesticides Used in Golf-Courses by Carp (Cyprinus carpio) a Willow Shiner (Gnathopogon caerulescens).,"Tsuda, T., S. Aoki, M. Kojima, a T. Fujita",1992,Comp.Biochem.Physiol.C 101(1):63-66,CCNC1=NC(NCC)=NC(Cl)=N1
122-39-4,WB,56,Cyprinus carpio,FT,Cb/Cw,2.179659176,LogBCF (L/kg bdwt),FW,ArnotGobas,Biodegradation a Bioconcentration of Existing Chemical Substances uer the Chemical Substances Control Law,Chemicals Evaluation a Research Institute,1992,http://qsar.cerij.or.jp/cgi-bin/DEGACC/iex.cgie,N(C1=CC=CC=C1)C1=CC=CC=C1
122-39-4,WB,56,Cyprinus carpio,FT,Cb/Cw,2.23029982,LogBCF (L/kg bdwt),FW,ArnotGobas,Biodegradation a Bioconcentration of Existing Chemical Substances uer the Chemical Substances Control Law,Chemicals Evaluation a Research Institute,1992,http://qsar.cerij.or.jp/cgi-bin/DEGACC/iex.cgie,N(C1=CC=CC=C1)C1=CC=CC=C1
123251-96-7,WB,42,Cyprinus carpio,FT,Cb/Cw,0.2,LogBCF (L/kg bdwt),,ArnotGobas,Biodegradation a Bioconcentration of Existing Chemical Substances uer the Chemical Substances Control Law,Chemicals Evaluation a Research Institute,1992,http://qsar.cerij.or.jp/cgi-bin/DEGACC/iex.cgie,NC1=C(Cl)C=C(C=C1S(O)(=O)=O)C1=CC(Cl)=C(N)C(=C1)S(O)(=O)=O
123251-96-7,WB,42,Cyprinus carpio,FT,Cb/Cw,-1,LogBCF (L/kg bdwt),,ArnotGobas,Biodegradation a Bioconcentration of Existing Chemical Substances uer the Chemical Substances Control Law,Chemicals Evaluation a Research Institute,1992,http://qsar.cerij.or.jp/cgi-bin/DEGACC/iex.cgie,NC1=C(Cl)C=C(C=C1S(O)(=O)=O)C1=CC(Cl)=C(N)C(=C1)S(O)(=O)=O
124-11-8,WB,56,Cyprinus carpio,FT,Cb/Cw,3.197381465,LogBCF (L/kg bdwt),FW,ArnotGobas,Biodegradation a Bioconcentration of Existing Chemical Substances uer the Chemical Substances Control Law,Chemicals Evaluation a Research Institute,1992,http://qsar.cerij.or.jp/cgi-bin/DEGACC/iex.cgie,CCCCCCCC=C
124-11-8,WB,56,Cyprinus carpio,FT,Cb/Cw,3.165404867,LogBCF (L/kg bdwt),FW,ArnotGobas,Biodegradation a Bioconcentration of Existing Chemical Substances uer the Chemical Substances Control Law,Chemicals Evaluation a Research Institute,1992,http://qsar.cerij.or.jp/cgi-bin/DEGACC/iex.cgie,CCCCCCCC=C
126-72-7,WB,42,Cyprinus carpio,FT,Cb/Cw,0.508769142,LogBCF (L/kg bdwt),,ArnotGobas,Biodegradation a Bioconcentration of Existing Chemical Substances uer the Chemical Substances Control Law,Chemicals Evaluation a Research Institute,1992,http://qsar.cerij.or.jp/cgi-bin/DEGACC/iex.cgie,BrCC(Br)COP(=O)(OCC(Br)CBr)OCC(Br)CBr
126-72-7,WB,42,Cyprinus carpio,FT,Cb/Cw,0.116176972,LogBCF (L/kg bdwt),,ArnotGobas,Biodegradation a Bioconcentration of Existing Chemical Substances uer the Chemical Substances Control Law,Chemicals Evaluation a Research Institute,1992,http://qsar.cerij.or.jp/cgi-bin/DEGACC/iex.cgie,BrCC(Br)COP(=O)(OCC(Br)CBr)OCC(Br)CBr
126-73-8,WB,4,Oryzias latipes,S,Cb/Cw,1.477121255,LogBCF (L/kg bdwt),FW,ArnotGobas,"Toxicity, Absorption a Elimination of Phosphoric Acid Triesters by Killifish a Goldfish","Sasaki, K., M. Takeda, a M. Uchiyama",1981,Bull.Environ.Contam.Toxicol. 27:775-782,CCCCOP(=O)(OCCCC)OCCCC
126-73-8,WB,42,Cyprinus carpio,FT,Cb/Cw,1.128252748,LogBCF (L/kg bdwt),FW,ArnotGobas,Biodegradation a Bioconcentration of Existing Chemical Substances uer the Chemical Substances Control Law,Chemicals Evaluation a Research Institute,1992,http://qsar.cerij.or.jp/cgi-bin/DEGACC/iex.cgie,CCCCOP(=O)(OCCCC)OCCCC
126-73-8,WB,42,Cyprinus carpio,FT,Cb/Cw,0.889173041,LogBCF (L/kg bdwt),FW,ArnotGobas,Biodegradation a Bioconcentration of Existing Chemical Substances uer the Chemical Substances Control Law,Chemicals Evaluation a Research Institute,1992,http://qsar.cerij.or.jp/cgi-bin/DEGACC/iex.cgie,CCCCOP(=O)(OCCCC)OCCCC
126-73-8,WB,1,Oryzias latipes,S,Cb/Cw,1.544068044,LogBCF (L/kg bdwt),FW,ArnotGobas,"Toxicity, Absorption a Elimination of Phosphoric Acid Triesters by Killifish a Goldfish","Sasaki, K., M. Takeda, a M. Uchiyama",1981,Bull.Environ.Contam.Toxicol. 27:775-782,CCCCOP(=O)(OCCCC)OCCCC
126-73-8,WB,2,Oryzias latipes,S,Cb/Cw,1.491361694,LogBCF (L/kg bdwt),FW,ArnotGobas,"Toxicity, Absorption a Elimination of Phosphoric Acid Triesters by Killifish a Goldfish","Sasaki, K., M. Takeda, a M. Uchiyama",1981,Bull.Environ.Contam.Toxicol. 27:775-782,CCCCOP(=O)(OCCCC)OCCCC
126-73-8,WB,4,Carassius auratus,S,Cb/Cw,0.84509804,LogBCF (L/kg bdwt),FW,ArnotGobas,"Toxicity, Absorption a Elimination of Phosphoric Acid Triesters by Killifish a Goldfish","Sasaki, K., M. Takeda, a M. Uchiyama",1981,Bull.Environ.Contam.Toxicol. 27:775-782,CCCCOP(=O)(OCCCC)OCCCC
126-73-8,WB,2,Carassius auratus,S,Cb/Cw,0.77815125,LogBCF (L/kg bdwt),FW,ArnotGobas,"Toxicity, Absorption a Elimination of Phosphoric Acid Triesters by Killifish a Goldfish","Sasaki, K., M. Takeda, a M. Uchiyama",1981,Bull.Environ.Contam.Toxicol. 27:775-782,CCCCOP(=O)(OCCCC)OCCCC
126-73-8,WB,38,Oryzias latipes,FT,,1.431363764,LogBCF (L/kg bdwt),FW,ArnotGobas,Bioconcentration a Excretion of Phosphoric Acid Triesters by Killifish (Oryzias latipes),"Sasaki, K., T. Suzuki, M. Takeda, a M. Uchiyama",1982,Bull.Environ.Contam.Toxicol. 28:752-759,CCCCOP(=O)(OCCCC)OCCCC
127-18-4,WB,56,Cyprinus carpio,FT,Cb/Cw,1.716176972,LogBCF (L/kg bdwt),FW,ArnotGobas,Biodegradation a Bioconcentration of Existing Chemical Substances uer the Chemical Substances Control Law,Chemicals Evaluation a Research Institute,1992,http://qsar.cerij.or.jp/cgi-bin/DEGACC/iex.cgie,ClC(Cl)=C(Cl)Cl
127-18-4,WB,56,Cyprinus carpio,FT,Cb/Cw,1.713190842,LogBCF (L/kg bdwt),FW,ArnotGobas,Biodegradation a Bioconcentration of Existing Chemical Substances uer the Chemical Substances Control Law,Chemicals Evaluation a Research Institute,1992,http://qsar.cerij.or.jp/cgi-bin/DEGACC/iex.cgie,ClC(Cl)=C(Cl)Cl
127-27-5,WB,20,Oncorhynchus mykiss,FT,Cb/Cw,1.84509804,LogBCF (L/kg bdwt),FW,ArnotGobas,Free a Conjugated Concentrations of Nine Resin Acids in Rainbow Trout (Oncorhynchus mykiss) Following Waterborne Exposure,"Niimi, A.J., a H.B. Lee",1992,Environ.Toxicol.Chem. 11(10):1403-1407,CC1(CCC2C(CCC3C2(C)CCCC3(C)C(O)=O)=C1)C=C
127-27-5,WB,14,Oncorhynchus mykiss,FT,Cb/Cw,1.86332286,LogBCF (L/kg bdwt),FW,ArnotGobas,Free a Conjugated Concentrations of Nine Resin Acids in Rainbow Trout (Oncorhynchus mykiss) Following Waterborne Exposure,"Niimi, A.J., a H.B. Lee",1992,Environ.Toxicol.Chem. 11(10):1403-1407,CC1(CCC2C(CCC3C2(C)CCCC3(C)C(O)=O)=C1)C=C
127-90-2,WB,56,Cyprinus carpio,FT,Cb/Cw,3.591596606,LogBCF (L/kg bdwt),,ArnotGobas,Biodegradation a Bioconcentration of Existing Chemical Substances uer the Chemical Substances Control Law,Chemicals Evaluation a Research Institute,1992,http://qsar.cerij.or.jp/cgi-bin/DEGACC/iex.cgie,ClC(COCC(Cl)C(Cl)(Cl)Cl)C(Cl)(Cl)Cl
127-90-2,WB,56,Cyprinus carpio,FT,Cb/Cw,3.28017968,LogBCF (L/kg bdwt),,ArnotGobas,Biodegradation a Bioconcentration of Existing Chemical Substances uer the Chemical Substances Control Law,Chemicals Evaluation a Research Institute,1992,http://qsar.cerij.or.jp/cgi-bin/DEGACC/iex.cgie,ClC(COCC(Cl)C(Cl)(Cl)Cl)C(Cl)(Cl)Cl
129-00-0,WB,28,Poecilia reticulata,FT,Cb/Cw,2.986771734,LogBCF (L/kg bdwt),FW,ArnotGobas,Implications to Aquatic Environment of Polynuclear Aromatic Hydrocarbons Liberated From Northern Great Plains Coal,"Carlson, R.M., A.R. Oyler, E.H. Gerhart, R. Caple, K.J. Welch, H.L. Kopperman, D. Bodenner, a D. Swanson",1979,"EPA-600/3-79-093, U.S.EPA, Duluth, MN :156 p.",C1=CC2=CC=C3C=CC=C4C=CC(=C1)C2=C34
129-00-0,WB,21,Poecilia reticulata,FT,Cb/Cw,3.414973348,LogBCF (L/kg bdwt),FW,ArnotGobas,Implications to Aquatic Environment of Polynuclear Aromatic Hydrocarbons Liberated From Northern Great Plains Coal,"Carlson, R.M., A.R. Oyler, E.H. Gerhart, R. Caple, K.J. Welch, H.L. Kopperman, D. Bodenner, a D. Swanson",1979,"EPA-600/3-79-093, U.S.EPA, Duluth, MN :156 p.",C1=CC2=CC=C3C=CC=C4C=CC(=C1)C2=C34
129-00-0,WB,14,Poecilia reticulata,FT,Cb/Cw,3.361727836,LogBCF (L/kg bdwt),FW,ArnotGobas,Implications to Aquatic Environment of Polynuclear Aromatic Hydrocarbons Liberated From Northern Great Plains Coal,"Carlson, R.M., A.R. Oyler, E.H. Gerhart, R. Caple, K.J. Welch, H.L. Kopperman, D. Bodenner, a D. Swanson",1979,"EPA-600/3-79-093, U.S.EPA, Duluth, MN :156 p.",C1=CC2=CC=C3C=CC=C4C=CC(=C1)C2=C34
129-00-0,WB,7,Poecilia reticulata,FT,Cb/Cw,3.146128036,LogBCF (L/kg bdwt),FW,ArnotGobas,Implications to Aquatic Environment of Polynuclear Aromatic Hydrocarbons Liberated From Northern Great Plains Coal,"Carlson, R.M., A.R. Oyler, E.H. Gerhart, R. Caple, K.J. Welch, H.L. Kopperman, D. Bodenner, a D. Swanson",1979,"EPA-600/3-79-093, U.S.EPA, Duluth, MN :156 p.",C1=CC2=CC=C3C=CC=C4C=CC(=C1)C2=C34
129-00-0,WB,2,Poecilia reticulata,FT,Cb/Cw,3.079181246,LogBCF (L/kg bdwt),FW,ArnotGobas,Implications to Aquatic Environment of Polynuclear Aromatic Hydrocarbons Liberated From Northern Great Plains Coal,"Carlson, R.M., A.R. Oyler, E.H. Gerhart, R. Caple, K.J. Welch, H.L. Kopperman, D. Bodenner, a D. Swanson",1979,"EPA-600/3-79-093, U.S.EPA, Duluth, MN :156 p.",C1=CC2=CC=C3C=CC=C4C=CC(=C1)C2=C34
129-00-0,WB,4,Poecilia reticulata,FT,Cb/Cw,3.079181246,LogBCF (L/kg bdwt),FW,ArnotGobas,Implications to Aquatic Environment of Polynuclear Aromatic Hydrocarbons Liberated From Northern Great Plains Coal,"Carlson, R.M., A.R. Oyler, E.H. Gerhart, R. Caple, K.J. Welch, H.L. Kopperman, D. Bodenner, a D. Swanson",1979,"EPA-600/3-79-093, U.S.EPA, Duluth, MN :156 p.",C1=CC2=CC=C3C=CC=C4C=CC(=C1)C2=C34
129-00-0,WB,36,Cyprinodon variegatus,FT,K1/K2,2.161368002,LogBCF (L/kg bdwt),SW,ArnotGobas,"Bioconcentration, biotransformation, a elimination of polycyclic aromatic hydrocarbons in sheepshead minnows (cyprinodon variegatus) exposed to contaminated seawater","Jonsson, G., Bechmann, R.K., Bamber, S.D. a Baussant, T.",2004,Environmental Toxicology a Chemistry 23(6):1538-1548,C1=CC2=CC=C3C=CC=C4C=CC(=C1)C2=C34
129-00-0,WB,36,Cyprinodon variegatus,FT,K1/K2,1.986771734,LogBCF (L/kg bdwt),SW,ArnotGobas,"Bioconcentration, biotransformation, a elimination of polycyclic aromatic hydrocarbons in sheepshead minnows (cyprinodon variegatus) exposed to contaminated seawater","Jonsson, G., Bechmann, R.K., Bamber, S.D. a Baussant, T.",2004,Environmental Toxicology a Chemistry 23(6):1538-1548,C1=CC2=CC=C3C=CC=C4C=CC(=C1)C2=C34
129-00-0,WB,36,Cyprinodon variegatus,FT,Cb/Cw,1.72427587,LogBCF (L/kg bdwt),SW,ArnotGobas,"Bioconcentration, biotransformation, a elimination of polycyclic aromatic hydrocarbons in sheepshead minnows (cyprinodon variegatus) exposed to contaminated seawater","Jonsson, G., Bechmann, R.K., Bamber, S.D. a Baussant, T.",2004,Environmental Toxicology a Chemistry 23(6):1538-1548,C1=CC2=CC=C3C=CC=C4C=CC(=C1)C2=C34
129-00-0,WB,36,Cyprinodon variegatus,FT,Cb/Cw,1.698970004,LogBCF (L/kg bdwt),SW,ArnotGobas,"Bioconcentration, biotransformation, a elimination of polycyclic aromatic hydrocarbons in sheepshead minnows (cyprinodon variegatus) exposed to contaminated seawater","Jonsson, G., Bechmann, R.K., Bamber, S.D. a Baussant, T.",2004,Environmental Toxicology a Chemistry 23(6):1538-1548,C1=CC2=CC=C3C=CC=C4C=CC(=C1)C2=C34
129-00-0,WB,,Carassius auratus,,Cb/Cw,2.6599162,LogBCF (L/kg bdwt),,ArnotGobas,Partition Coefficients as a Measure of Bioconcentration Potential of Crude Oil Compous in Fish a Shellfish,"Ogata, M., K. Fujisawa, Y. Ogino a E. Mano",1984,Bull. Environ. Contam. Toxicol. 33:561-567,C1=CC2=CC=C3C=CC=C4C=CC(=C1)C2=C34
129-43-1,WB,56,Cyprinus carpio,FT,Cb/Cw,2.26855674,LogBCF (L/kg bdwt),,ArnotGobas,Biodegradation a Bioconcentration of Existing Chemical Substances uer the Chemical Substances Control Law,Chemicals Evaluation a Research Institute,1992,http://qsar.cerij.or.jp/cgi-bin/DEGACC/iex.cgie,OC1=CC=CC2=C1C(=O)C1=CC=CC=C1C2=O
129-43-1,WB,56,Cyprinus carpio,FT,Cb/Cw,2.25137102,LogBCF (L/kg bdwt),,ArnotGobas,Biodegradation a Bioconcentration of Existing Chemical Substances uer the Chemical Substances Control Law,Chemicals Evaluation a Research Institute,1992,http://qsar.cerij.or.jp/cgi-bin/DEGACC/iex.cgie,OC1=CC=CC2=C1C(=O)C1=CC=CC=C1C2=O
130-13-2,WB,42,Cyprinus carpio,FT,Cb/Cw,0.78,LogBCF (L/kg bdwt),,ArnotGobas,Biodegradation a Bioconcentration of Existing Chemical Substances uer the Chemical Substances Control Law,Chemicals Evaluation a Research Institute,1992,http://qsar.cerij.or.jp/cgi-bin/DEGACC/iex.cgie,NC1=CC=C(C2=CC=CC=C12)S(O)(=O)=O
130-13-2,WB,42,Cyprinus carpio,FT,Cb/Cw,-0.22,LogBCF (L/kg bdwt),,ArnotGobas,Biodegradation a Bioconcentration of Existing Chemical Substances uer the Chemical Substances Control Law,Chemicals Evaluation a Research Institute,1992,http://qsar.cerij.or.jp/cgi-bin/DEGACC/iex.cgie,NC1=CC=C(C2=CC=CC=C12)S(O)(=O)=O
13116-53-5,WB,56,Cyprinus carpio,FT,Cb/Cw,1.563265989,LogBCF (L/kg bdwt),,ArnotGobas,Biodegradation a Bioconcentration of Existing Chemical Substances uer the Chemical Substances Control Law,Chemicals Evaluation a Research Institute,1992,http://qsar.cerij.or.jp/cgi-bin/DEGACC/iex.cgie,ClCC(Cl)(Cl)CCl
13116-53-5,WB,56,Cyprinus carpio,FT,Cb/Cw,1.516706044,LogBCF (L/kg bdwt),,ArnotGobas,Biodegradation a Bioconcentration of Existing Chemical Substances uer the Chemical Substances Control Law,Chemicals Evaluation a Research Institute,1992,http://qsar.cerij.or.jp/cgi-bin/DEGACC/iex.cgie,ClCC(Cl)(Cl)CCl
131-52-2,WB,115,Oncorhynchus mykiss,FT,Cb/Cw,2.301029996,LogBCF (L/kg bdwt),FW,ArnotGobas,Uptake of Sodium Pentachlorophenate (NaPCP) from Water by Rainbow Trout (Salmo gairdneri) exposed to concentrations in the ng/L Range.,"Niimi, A.J. a C.A. McFadden",1982,Bull. Environ. Contam. Toxicol. 28:11-19,OC1=C(Cl)C(Cl)=C(Cl)C(Cl)=C1Cl
131-52-2,WB,80,Oncorhynchus mykiss,FT,Cb/Cw,2.77524626,LogBCF (L/kg bdwt),FW,ArnotGobas,The Influence of Dietary Carbohydrate:Lipid Ratio on the Chronic Toxicity of Sodium Pentachlorophenate to Rainbow Trout (Salmo gairdneri Richardson),"Hickie, B.E., D.G. Dixon, a J.F. Leatherla",1989,Fish Physiol.Biochem. 6(3):175-185,OC1=C(Cl)C(Cl)=C(Cl)C(Cl)=C1Cl
131-52-2,WB,115,Oncorhynchus mykiss,FT,Cb/Cw,2.380211242,LogBCF (L/kg bdwt),FW,ArnotGobas,Uptake of Sodium Pentachlorophenate (NaPCP) from Water by Rainbow Trout (Salmo gairdneri) exposed to concentrations in the ng/L Range.,"Niimi, A.J. a C.A. McFadden",1982,Bull. Environ. Contam. Toxicol. 28:11-19,OC1=C(Cl)C(Cl)=C(Cl)C(Cl)=C1Cl
131-52-2,,4,Mugil cephalus,FT,Cb/Cw,1.897627091,LogBCF (L/kg bdwt),SW,ArnotGobas,"Effects of Sodium Pentachlorophenate on Several Estuarine Animals: Toxicity, Uptake, a Depuration","Schimmel, S.C., J.M. Patrick Jr., a L.F. Faas",1978,"In: K.R.Rao (Ed.), Pentachlorophenol, Plenum Publ.Corp., New York, NY:147-155; EPA-600/J-78/ 078, U.S.EPA, Gulf Breeze, FL :147-155 (U.S.NTIS PB-291127/9ST)",OC1=C(Cl)C(Cl)=C(Cl)C(Cl)=C1Cl
131-52-2,,4,Mugil cephalus,FT,Cb/Cw,1.748188027,LogBCF (L/kg bdwt),SW,ArnotGobas,"Effects of Sodium Pentachlorophenate on Several Estuarine Animals: Toxicity, Uptake, a Depuration","Schimmel, S.C., J.M. Patrick Jr., a L.F. Faas",1978,"In: K.R.Rao (Ed.), Pentachlorophenol, Plenum Publ.Corp., New York, NY:147-155; EPA-600/J-78/ 078, U.S.EPA, Gulf Breeze, FL :147-155 (U.S.NTIS PB-291127/9ST)",OC1=C(Cl)C(Cl)=C(Cl)C(Cl)=C1Cl
131-52-2,,4,Fuulus similis,FT,Cb/Cw,1.612783857,LogBCF (L/kg bdwt),SW,ArnotGobas,"Effects of Sodium Pentachlorophenate on Several Estuarine Animals: Toxicity, Uptake, a Depuration","Schimmel, S.C., J.M. Patrick Jr., a L.F. Faas",1978,"In: K.R.Rao (Ed.), Pentachlorophenol, Plenum Publ.Corp., New York, NY:147-155; EPA-600/J-78/ 078, U.S.EPA, Gulf Breeze, FL :147-155 (U.S.NTIS PB-291127/9ST)",OC1=C(Cl)C(Cl)=C(Cl)C(Cl)=C1Cl
131-52-2,,4,Fuulus similis,FT,Cb/Cw,1.544068044,LogBCF (L/kg bdwt),SW,ArnotGobas,"Effects of Sodium Pentachlorophenate on Several Estuarine Animals: Toxicity, Uptake, a Depuration","Schimmel, S.C., J.M. Patrick Jr., a L.F. Faas",1978,"In: K.R.Rao (Ed.), Pentachlorophenol, Plenum Publ.Corp., New York, NY:147-155; EPA-600/J-78/ 078, U.S.EPA, Gulf Breeze, FL :147-155 (U.S.NTIS PB-291127/9ST)",OC1=C(Cl)C(Cl)=C(Cl)C(Cl)=C1Cl
131-52-2,,4,Fuulus similis,FT,Cb/Cw,1.491361694,LogBCF (L/kg bdwt),SW,ArnotGobas,"Effects of Sodium Pentachlorophenate on Several Estuarine Animals: Toxicity, Uptake, a Depuration","Schimmel, S.C., J.M. Patrick Jr., a L.F. Faas",1978,"In: K.R.Rao (Ed.), Pentachlorophenol, Plenum Publ.Corp., New York, NY:147-155; EPA-600/J-78/ 078, U.S.EPA, Gulf Breeze, FL :147-155 (U.S.NTIS PB-291127/9ST)",OC1=C(Cl)C(Cl)=C(Cl)C(Cl)=C1Cl
131-52-2,,4,Fuulus similis,FT,Cb/Cw,1.079181246,LogBCF (L/kg bdwt),SW,ArnotGobas,"Effects of Sodium Pentachlorophenate on Several Estuarine Animals: Toxicity, Uptake, a Depuration","Schimmel, S.C., J.M. Patrick Jr., a L.F. Faas",1978,"In: K.R.Rao (Ed.), Pentachlorophenol, Plenum Publ.Corp., New York, NY:147-155; EPA-600/J-78/ 078, U.S.EPA, Gulf Breeze, FL :147-155 (U.S.NTIS PB-291127/9ST)",OC1=C(Cl)C(Cl)=C(Cl)C(Cl)=C1Cl
131-52-2,,4,Mugil cephalus,FT,Cb/Cw,0.944482672,LogBCF (L/kg bdwt),SW,ArnotGobas,"Effects of Sodium Pentachlorophenate on Several Estuarine Animals: Toxicity, Uptake, a Depuration","Schimmel, S.C., J.M. Patrick Jr., a L.F. Faas",1978,"In: K.R.Rao (Ed.), Pentachlorophenol, Plenum Publ.Corp., New York, NY:147-155; EPA-600/J-78/ 078, U.S.EPA, Gulf Breeze, FL :147-155 (U.S.NTIS PB-291127/9ST)",OC1=C(Cl)C(Cl)=C(Cl)C(Cl)=C1Cl
131-52-2,,4,Mugil cephalus,FT,Cb/Cw,0.799340549,LogBCF (L/kg bdwt),SW,ArnotGobas,"Effects of Sodium Pentachlorophenate on Several Estuarine Animals: Toxicity, Uptake, a Depuration","Schimmel, S.C., J.M. Patrick Jr., a L.F. Faas",1978,"In: K.R.Rao (Ed.), Pentachlorophenol, Plenum Publ.Corp., New York, NY:147-155; EPA-600/J-78/ 078, U.S.EPA, Gulf Breeze, FL :147-155 (U.S.NTIS PB-291127/9ST)",OC1=C(Cl)C(Cl)=C(Cl)C(Cl)=C1Cl
132-64-9,WB,28,Pimephales promelas,FT,Cb/Cw,3.22,LogBCF (L/kg bdwt),FW,ArnotGobas,Implications to Aquatic Environment of Polynuclear Aromatic Hydrocarbons Liberated From Northern Great Plains Coal,"Carlson, R.M., A.R. Oyler, E.H. Gerhart, R. Caple, K.J. Welch, H.L. Kopperman, D. Bodenner, a D. Swanson",1979,"EPA-600/3-79-093, U.S.EPA, Duluth, MN :156 p.",O1C2=C(C=CC=C2)C2=C1C=CC=C2
132-64-9,WB,56,Cyprinus carpio,FT,Cb/Cw,3.181686365,LogBCF (L/kg bdwt),FW,ArnotGobas,Biodegradation a Bioconcentration of Existing Chemical Substances uer the Chemical Substances Control Law,Chemicals Evaluation a Research Institute,1992,http://qsar.cerij.or.jp/cgi-bin/DEGACC/iex.cgie,O1C2=C(C=CC=C2)C2=C1C=CC=C2
132-64-9,WB,56,Cyprinus carpio,FT,Cb/Cw,3.164893956,LogBCF (L/kg bdwt),FW,ArnotGobas,Biodegradation a Bioconcentration of Existing Chemical Substances uer the Chemical Substances Control Law,Chemicals Evaluation a Research Institute,1992,http://qsar.cerij.or.jp/cgi-bin/DEGACC/iex.cgie,O1C2=C(C=CC=C2)C2=C1C=CC=C2
132-65-0,WB,21,Scophthalmus maximus,FT,K1/K2,3.174641193,LogBCF (L/kg bdwt),SW,ArnotGobas,Bioaccumulation of polycyclic aromatic compous: 2. Modeling bioaccumulation in marine organisms chronically exposed to dispersed oil,"Baussant, T., Sanni, S., Skadshlim, A., Jonsson, G., Borseth, J.F. a Gaudebert, B.",2001,Environmental Toxicology a Chemistry 20(6):1185-1206,S1C2=C(C=CC=C2)C2=C1C=CC=C2
132-65-0,WB,56,Cyprinus carpio,FT,Cb/Cw,3.258769142,LogBCF (L/kg bdwt),FW,ArnotGobas,Biodegradation a Bioconcentration of Existing Chemical Substances uer the Chemical Substances Control Law,Chemicals Evaluation a Research Institute,1992,http://qsar.cerij.or.jp/cgi-bin/DEGACC/iex.cgie,S1C2=C(C=CC=C2)C2=C1C=CC=C2
132-65-0,WB,56,Cyprinus carpio,FT,Cb/Cw,3.052745925,LogBCF (L/kg bdwt),FW,ArnotGobas,Biodegradation a Bioconcentration of Existing Chemical Substances uer the Chemical Substances Control Law,Chemicals Evaluation a Research Institute,1992,http://qsar.cerij.or.jp/cgi-bin/DEGACC/iex.cgie,S1C2=C(C=CC=C2)C2=C1C=CC=C2
133-06-2,WB,1,Gnathopogon coerulescens,FT,Cb/Cw,2.301029996,LogBCF (L/kg bdwt),FW,ArnotGobas,Accumulation a Excretion of Pesticides Used in Golf-Courses by Carp (Cyprinus carpio) a Willow Shiner (Gnathopogon caerulescens).,"Tsuda, T., S. Aoki, M. Kojima, a T. Fujita",1992,Comp.Biochem.Physiol.C 101(1):63-66,ClC(Cl)(Cl)SN1C(=O)C2CC=CCC2C1=O
133-06-2,WB,7,Gnathopogon coerulescens,FT,Cb/Cw,2.707570176,LogBCF (L/kg bdwt),FW,ArnotGobas,Accumulation a Excretion of Pesticides Used in Golf-Courses by Carp (Cyprinus carpio) a Willow Shiner (Gnathopogon caerulescens).,"Tsuda, T., S. Aoki, M. Kojima, a T. Fujita",1992,Comp.Biochem.Physiol.C 101(1):63-66,ClC(Cl)(Cl)SN1C(=O)C2CC=CCC2C1=O
133-06-2,WB,14,Gnathopogon coerulescens,FT,Cb/Cw,2.698970004,LogBCF (L/kg bdwt),FW,ArnotGobas,Accumulation a Excretion of Pesticides Used in Golf-Courses by Carp (Cyprinus carpio) a Willow Shiner (Gnathopogon caerulescens).,"Tsuda, T., S. Aoki, M. Kojima, a T. Fujita",1992,Comp.Biochem.Physiol.C 101(1):63-66,ClC(Cl)(Cl)SN1C(=O)C2CC=CCC2C1=O
133-06-2,WB,3,Gnathopogon coerulescens,FT,Cb/Cw,2.431363764,LogBCF (L/kg bdwt),FW,ArnotGobas,Accumulation a Excretion of Pesticides Used in Golf-Courses by Carp (Cyprinus carpio) a Willow Shiner (Gnathopogon caerulescens).,"Tsuda, T., S. Aoki, M. Kojima, a T. Fujita",1992,Comp.Biochem.Physiol.C 101(1):63-66,ClC(Cl)(Cl)SN1C(=O)C2CC=CCC2C1=O
133-06-2,WB,10,Gnathopogon coerulescens,FT,Cb/Cw,2.397940009,LogBCF (L/kg bdwt),FW,ArnotGobas,Accumulation a Excretion of Pesticides Used in Golf-Courses by Carp (Cyprinus carpio) a Willow Shiner (Gnathopogon caerulescens).,"Tsuda, T., S. Aoki, M. Kojima, a T. Fujita",1992,Comp.Biochem.Physiol.C 101(1):63-66,ClC(Cl)(Cl)SN1C(=O)C2CC=CCC2C1=O
133-06-2,WB,10,Cyprinus carpio,FT,Cb/Cw,2.204119983,LogBCF (L/kg bdwt),FW,ArnotGobas,Accumulation a Excretion of Pesticides Used in Golf-Courses by Carp (Cyprinus carpio) a Willow Shiner (Gnathopogon caerulescens).,"Tsuda, T., S. Aoki, M. Kojima, a T. Fujita",1992,Comp.Biochem.Physiol.C 101(1):63-66,ClC(Cl)(Cl)SN1C(=O)C2CC=CCC2C1=O
133-06-2,WB,1,Cyprinus carpio,FT,Cb/Cw,1.977723605,LogBCF (L/kg bdwt),FW,ArnotGobas,Accumulation a Excretion of Pesticides Used in Golf-Courses by Carp (Cyprinus carpio) a Willow Shiner (Gnathopogon caerulescens).,"Tsuda, T., S. Aoki, M. Kojima, a T. Fujita",1992,Comp.Biochem.Physiol.C 101(1):63-66,ClC(Cl)(Cl)SN1C(=O)C2CC=CCC2C1=O
133-06-2,WB,3,Cyprinus carpio,FT,Cb/Cw,1.963787827,LogBCF (L/kg bdwt),FW,ArnotGobas,Accumulation a Excretion of Pesticides Used in Golf-Courses by Carp (Cyprinus carpio) a Willow Shiner (Gnathopogon caerulescens).,"Tsuda, T., S. Aoki, M. Kojima, a T. Fujita",1992,Comp.Biochem.Physiol.C 101(1):63-66,ClC(Cl)(Cl)SN1C(=O)C2CC=CCC2C1=O
133-06-2,WB,7,Cyprinus carpio,FT,Cb/Cw,1.903089987,LogBCF (L/kg bdwt),FW,ArnotGobas,Accumulation a Excretion of Pesticides Used in Golf-Courses by Carp (Cyprinus carpio) a Willow Shiner (Gnathopogon caerulescens).,"Tsuda, T., S. Aoki, M. Kojima, a T. Fujita",1992,Comp.Biochem.Physiol.C 101(1):63-66,ClC(Cl)(Cl)SN1C(=O)C2CC=CCC2C1=O
133-06-2,WB,14,Cyprinus carpio,FT,Cb/Cw,1.86923172,LogBCF (L/kg bdwt),FW,ArnotGobas,Accumulation a Excretion of Pesticides Used in Golf-Courses by Carp (Cyprinus carpio) a Willow Shiner (Gnathopogon caerulescens).,"Tsuda, T., S. Aoki, M. Kojima, a T. Fujita",1992,Comp.Biochem.Physiol.C 101(1):63-66,ClC(Cl)(Cl)SN1C(=O)C2CC=CCC2C1=O
1330-78-5,WB,14,Alburnus alburnus,FT,Cb/Cw,2.899820502,LogBCF (L/kg bdwt),Brackish,ArnotGobas,Bioaccumulation a Effects of Some Technical Triaryl Phosphate Products in Fish a Nitocra spinipes.,"Bengtsson, B.E. et al.",1986,Environ.Toxicol.Chem. 5:853-861,CC1=CC=CC=C1OP(=O)(OC1=CC=CC=C1C)OC1=CC=CC=C1C
13358-11-7,WB,56,Cyprinus carpio,FT,Cb/Cw,3.141280324,LogBCF (L/kg bdwt),,ArnotGobas,Biodegradation a Bioconcentration of Existing Chemical Substances uer the Chemical Substances Control Law,Chemicals Evaluation a Research Institute,1992,http://qsar.cerij.or.jp/cgi-bin/DEGACC/iex.cgie,CCCCC(CC)CN1C(=O)C2C(C1=O)C1(CCC2(C)C=C1)C(C)C
13358-11-7,WB,56,Cyprinus carpio,FT,Cb/Cw,2.973115781,LogBCF (L/kg bdwt),,ArnotGobas,Biodegradation a Bioconcentration of Existing Chemical Substances uer the Chemical Substances Control Law,Chemicals Evaluation a Research Institute,1992,http://qsar.cerij.or.jp/cgi-bin/DEGACC/iex.cgie,CCCCC(CC)CN1C(=O)C2C(C1=O)C1(CCC2(C)C=C1)C(C)C
134-47-4,WB,42,Cyprinus carpio,FT,Cb/Cw,0.26,LogBCF (L/kg bdwt),,ArnotGobas,Biodegradation a Bioconcentration of Existing Chemical Substances uer the Chemical Substances Control Law,Chemicals Evaluation a Research Institute,1992,http://qsar.cerij.or.jp/cgi-bin/DEGACC/iex.cgie,OC1=CC(=CC2=CC(NC(=O)NC3=CC4=CC(=CC(O)=C4C=C3)S(O)(=O)=O)=CC=C12)S(O)(=O)=O
134-47-4,WB,42,Cyprinus carpio,FT,Cb/Cw,-0.72,LogBCF (L/kg bdwt),,ArnotGobas,Biodegradation a Bioconcentration of Existing Chemical Substances uer the Chemical Substances Control Law,Chemicals Evaluation a Research Institute,1992,http://qsar.cerij.or.jp/cgi-bin/DEGACC/iex.cgie,OC1=CC(=CC2=CC(NC(=O)NC3=CC4=CC(=CC(O)=C4C=C3)S(O)(=O)=O)=CC=C12)S(O)(=O)=O
13475-82-6,WB,12,Pimephales promelas,FT,Cb/Cw,2.944482672,LogBCF (L/kg bdwt),FW,ArnotGobas,"Bioconcentration of n-dodecane a its highly branched isomer 2,2,4,6,6-pentamethylheptane in Fathead minnows.","Tolls, J. a J. van Dijk",2002,Chemosphere 47: 1049-1057,CC(CC(C)(C)C)CC(C)(C)C
13540-50-6,WB,56,Cyprinus carpio,FT,Cb/Cw,3.259463054,LogBCF (L/kg bdwt),,ArnotGobas,Biodegradation a Bioconcentration of Existing Chemical Substances uer the Chemical Substances Control Law,Chemicals Evaluation a Research Institute,1992,http://qsar.cerij.or.jp/cgi-bin/DEGACC/iex.cgie,CC1=CC=C(C)C(CC2=CC=CC=C2)=C1
13540-50-6,WB,56,Cyprinus carpio,FT,Cb/Cw,3.136706044,LogBCF (L/kg bdwt),,ArnotGobas,Biodegradation a Bioconcentration of Existing Chemical Substances uer the Chemical Substances Control Law,Chemicals Evaluation a Research Institute,1992,http://qsar.cerij.or.jp/cgi-bin/DEGACC/iex.cgie,CC1=CC=C(C)C(CC2=CC=CC=C2)=C1
13674-87-8,WB,32,Oryzias latipes,FT,,1.69019608,LogBCF (L/kg bdwt),FW,ArnotGobas,Bioconcentration a Excretion of Phosphoric Acid Triesters by Killifish (Oryzias latipes),"Sasaki, K., T. Suzuki, M. Takeda, a M. Uchiyama",1982,Bull.Environ.Contam.Toxicol. 28:752-759,ClCC(CCl)OP(=O)(OC(CCl)CCl)OC(CCl)CCl
13674-87-8,WB,42,Cyprinus carpio,FT,Cb/Cw,1.080362689,LogBCF (L/kg bdwt),FW,ArnotGobas,Biodegradation a Bioconcentration of Existing Chemical Substances uer the Chemical Substances Control Law,Chemicals Evaluation a Research Institute,1992,http://qsar.cerij.or.jp/cgi-bin/DEGACC/iex.cgie,ClCC(CCl)OP(=O)(OC(CCl)CCl)OC(CCl)CCl
13674-87-8,WB,42,Cyprinus carpio,FT,Cb/Cw,0.256874793,LogBCF (L/kg bdwt),FW,ArnotGobas,Biodegradation a Bioconcentration of Existing Chemical Substances uer the Chemical Substances Control Law,Chemicals Evaluation a Research Institute,1992,http://qsar.cerij.or.jp/cgi-bin/DEGACC/iex.cgie,ClCC(CCl)OP(=O)(OC(CCl)CCl)OC(CCl)CCl
13674-87-8,WB,2,Oryzias latipes,S,Cb/Cw,2.041392685,LogBCF (L/kg bdwt),FW,ArnotGobas,"Toxicity, Absorption a Elimination of Phosphoric Acid Triesters by Killifish a Goldfish","Sasaki, K., M. Takeda, a M. Uchiyama",1981,Bull.Environ.Contam.Toxicol. 27:775-782,ClCC(CCl)OP(=O)(OC(CCl)CCl)OC(CCl)CCl
13674-87-8,WB,4,Oryzias latipes,S,Cb/Cw,1.886490725,LogBCF (L/kg bdwt),FW,ArnotGobas,"Toxicity, Absorption a Elimination of Phosphoric Acid Triesters by Killifish a Goldfish","Sasaki, K., M. Takeda, a M. Uchiyama",1981,Bull.Environ.Contam.Toxicol. 27:775-782,ClCC(CCl)OP(=O)(OC(CCl)CCl)OC(CCl)CCl
13674-87-8,WB,1,Oryzias latipes,S,Cb/Cw,2.053078443,LogBCF (L/kg bdwt),FW,ArnotGobas,"Toxicity, Absorption a Elimination of Phosphoric Acid Triesters by Killifish a Goldfish","Sasaki, K., M. Takeda, a M. Uchiyama",1981,Bull.Environ.Contam.Toxicol. 27:775-782,ClCC(CCl)OP(=O)(OC(CCl)CCl)OC(CCl)CCl
13674-87-8,WB,1,Carassius auratus,S,Cb/Cw,0.698970004,LogBCF (L/kg bdwt),FW,ArnotGobas,"Toxicity, Absorption a Elimination of Phosphoric Acid Triesters by Killifish a Goldfish","Sasaki, K., M. Takeda, a M. Uchiyama",1981,Bull.Environ.Contam.Toxicol. 27:775-782,ClCC(CCl)OP(=O)(OC(CCl)CCl)OC(CCl)CCl
13674-87-8,WB,4,Carassius auratus,S,Cb/Cw,0.477121255,LogBCF (L/kg bdwt),FW,ArnotGobas,"Toxicity, Absorption a Elimination of Phosphoric Acid Triesters by Killifish a Goldfish","Sasaki, K., M. Takeda, a M. Uchiyama",1981,Bull.Environ.Contam.Toxicol. 27:775-782,ClCC(CCl)OP(=O)(OC(CCl)CCl)OC(CCl)CCl
13674-87-8,WB,30,Oryzias latipes,FT,,1.770852012,LogBCF (L/kg bdwt),FW,ArnotGobas,Bioconcentration a Excretion of Phosphoric Acid Triesters by Killifish (Oryzias latipes),"Sasaki, K., T. Suzuki, M. Takeda, a M. Uchiyama",1982,Bull.Environ.Contam.Toxicol. 28:752-759,ClCC(CCl)OP(=O)(OC(CCl)CCl)OC(CCl)CCl
13936-21-5,WB,56,Cyprinus carpio,FT,Cb/Cw,2.912185012,LogBCF (L/kg bdwt),,ArnotGobas,Biodegradation a Bioconcentration of Existing Chemical Substances uer the Chemical Substances Control Law,Chemicals Evaluation a Research Institute,1992,http://qsar.cerij.or.jp/cgi-bin/DEGACC/iex.cgie,CCCCCC1=CC=C2C(=O)C3=CC=CC=C3C(=O)C2=C1
141-93-5,WB,42,Cyprinus carpio,FT,Cb/Cw,2.777381465,LogBCF (L/kg bdwt),,ArnotGobas,Biodegradation a Bioconcentration of Existing Chemical Substances uer the Chemical Substances Control Law,Chemicals Evaluation a Research Institute,1992,http://qsar.cerij.or.jp/cgi-bin/DEGACC/iex.cgie,CCC1=CC(CC)=CC=C1
141-93-5,WB,42,Cyprinus carpio,FT,Cb/Cw,2.725308595,LogBCF (L/kg bdwt),,ArnotGobas,Biodegradation a Bioconcentration of Existing Chemical Substances uer the Chemical Substances Control Law,Chemicals Evaluation a Research Institute,1992,http://qsar.cerij.or.jp/cgi-bin/DEGACC/iex.cgie,CCC1=CC(CC)=CC=C1
1460-02-2,WB,70,Cyprinus carpio,FT,Cb/Cw,4.365955723,LogBCF (L/kg bdwt),,ArnotGobas,Biodegradation a Bioconcentration of Existing Chemical Substances uer the Chemical Substances Control Law,National Institute of Technology a Evaluation,2005,http://www.nite.go.jp/iex-e.html,CC(C)(C)C1=CC(=CC(=C1)C(C)(C)C)C(C)(C)C
1460-02-2,WB,70,Cyprinus carpio,FT,Cb/Cw,4.226084116,LogBCF (L/kg bdwt),,ArnotGobas,Biodegradation a Bioconcentration of Existing Chemical Substances uer the Chemical Substances Control Law,National Institute of Technology a Evaluation,2005,http://www.nite.go.jp/iex-e.html,CC(C)(C)C1=CC(=CC(=C1)C(C)(C)C)C(C)(C)C
1502-22-3,WB,42,Cyprinus carpio,FT,Cb/Cw,0.593579378,LogBCF (L/kg bdwt),FW,ArnotGobas,Biodegradation a Bioconcentration of Existing Chemical Substances uer the Chemical Substances Control Law,Chemicals Evaluation a Research Institute,1992,http://qsar.cerij.or.jp/cgi-bin/DEGACC/iex.cgie,O=C1CCCCC1C1=CCCCC1
1502-22-3,WB,42,Cyprinus carpio,FT,Cb/Cw,0.386706044,LogBCF (L/kg bdwt),FW,ArnotGobas,Biodegradation a Bioconcentration of Existing Chemical Substances uer the Chemical Substances Control Law,Chemicals Evaluation a Research Institute,1992,http://qsar.cerij.or.jp/cgi-bin/DEGACC/iex.cgie,O=C1CCCCC1C1=CCCCC1
15258-73-8,WB,42,Cyprinus carpio,FT,Cb/Cw,0.4120918,LogBCF (L/kg bdwt),,ArnotGobas,Biodegradation a Bioconcentration of Existing Chemical Substances uer the Chemical Substances Control Law,Chemicals Evaluation a Research Institute,1992,http://qsar.cerij.or.jp/cgi-bin/DEGACC/iex.cgie,OCC1=C(Cl)C=CC=C1Cl
15258-73-8,WB,42,Cyprinus carpio,FT,Cb/Cw,0.23029982,LogBCF (L/kg bdwt),,ArnotGobas,Biodegradation a Bioconcentration of Existing Chemical Substances uer the Chemical Substances Control Law,Chemicals Evaluation a Research Institute,1992,http://qsar.cerij.or.jp/cgi-bin/DEGACC/iex.cgie,OCC1=C(Cl)C=CC=C1Cl
1570-64-5,WB,42,Cyprinus carpio,FT,Cb/Cw,1.259021782,LogBCF (L/kg bdwt),,ArnotGobas,Biodegradation a Bioconcentration of Existing Chemical Substances uer the Chemical Substances Control Law,Chemicals Evaluation a Research Institute,1992,http://qsar.cerij.or.jp/cgi-bin/DEGACC/iex.cgie,CC1=CC(Cl)=CC=C1O
1570-64-5,WB,42,Cyprinus carpio,FT,Cb/Cw,1.012455842,LogBCF (L/kg bdwt),,ArnotGobas,Biodegradation a Bioconcentration of Existing Chemical Substances uer the Chemical Substances Control Law,Chemicals Evaluation a Research Institute,1992,http://qsar.cerij.or.jp/cgi-bin/DEGACC/iex.cgie,CC1=CC(Cl)=CC=C1O
1582-09-8,WB,166,Cyprinodon variegatus,FT,,4.062130535,LogBCF (L/kg bdwt),FW,ArnotGobas,"Chronic Toxicity of Chlordane, Trifluralin, a Pentachlorophenol to Sheepshead Minnows (Cyprinodon variegatus)","Parrish, P.R., E.E. Dyar, J.M. Enos, a W.G. Wilson",1978,"EPA-600/3-78-010, U.S.EPA, Gulf Breeze, FL :53 p.",CCCN(CCC)C1=C(C=C(C=C1[N+]([O-])=O)C(F)(F)F)[N+]([O-])=O
1582-09-8,WB,14,Pseudorasbora parva,FT,Cb/Cw,3.499961866,LogBCF (L/kg bdwt),FW,ArnotGobas,Measurement of the Bioconcentration Factors of Pesticides by Freshwater Fish a Their Correlation with Physicochemical Properties or Acute Toxicities,"Kanazawa, J.",1981,Pestic.Sci. 12(4):417-424,CCCN(CCC)C1=C(C=C(C=C1[N+]([O-])=O)C(F)(F)F)[N+]([O-])=O
1582-09-8,WB,28,Cyprinodon variegatus,FT,,4.062130535,LogBCF (L/kg bdwt),FW,ArnotGobas,"Chronic Toxicity of Chlordane, Trifluralin, a Pentachlorophenol to Sheepshead Minnows (Cyprinodon variegatus)","Parrish, P.R., E.E. Dyar, J.M. Enos, a W.G. Wilson",1978,"EPA-600/3-78-010, U.S.EPA, Gulf Breeze, FL :53 p.",CCCN(CCC)C1=C(C=C(C=C1[N+]([O-])=O)C(F)(F)F)[N+]([O-])=O
1582-09-8,WB,166,Cyprinodon variegatus,FT,,3.85082996,LogBCF (L/kg bdwt),FW,ArnotGobas,"Chronic Toxicity of Chlordane, Trifluralin, a Pentachlorophenol to Sheepshead Minnows (Cyprinodon variegatus)","Parrish, P.R., E.E. Dyar, J.M. Enos, a W.G. Wilson",1978,"EPA-600/3-78-010, U.S.EPA, Gulf Breeze, FL :53 p.",CCCN(CCC)C1=C(C=C(C=C1[N+]([O-])=O)C(F)(F)F)[N+]([O-])=O
1582-09-8,WB,166,Cyprinodon variegatus,FT,,3.680516809,LogBCF (L/kg bdwt),FW,ArnotGobas,"Chronic Toxicity of Chlordane, Trifluralin, a Pentachlorophenol to Sheepshead Minnows (Cyprinodon variegatus)","Parrish, P.R., E.E. Dyar, J.M. Enos, a W.G. Wilson",1978,"EPA-600/3-78-010, U.S.EPA, Gulf Breeze, FL :53 p.",CCCN(CCC)C1=C(C=C(C=C1[N+]([O-])=O)C(F)(F)F)[N+]([O-])=O
1582-09-8,WB,166,Cyprinodon variegatus,FT,,3.649626887,LogBCF (L/kg bdwt),FW,ArnotGobas,"Chronic Toxicity of Chlordane, Trifluralin, a Pentachlorophenol to Sheepshead Minnows (Cyprinodon variegatus)","Parrish, P.R., E.E. Dyar, J.M. Enos, a W.G. Wilson",1978,"EPA-600/3-78-010, U.S.EPA, Gulf Breeze, FL :53 p.",CCCN(CCC)C1=C(C=C(C=C1[N+]([O-])=O)C(F)(F)F)[N+]([O-])=O
1582-09-8,WB,28,Cyprinodon variegatus,FT,,3.627058464,LogBCF (L/kg bdwt),FW,ArnotGobas,"Chronic Toxicity of Chlordane, Trifluralin, a Pentachlorophenol to Sheepshead Minnows (Cyprinodon variegatus)","Parrish, P.R., E.E. Dyar, J.M. Enos, a W.G. Wilson",1978,"EPA-600/3-78-010, U.S.EPA, Gulf Breeze, FL :53 p.",CCCN(CCC)C1=C(C=C(C=C1[N+]([O-])=O)C(F)(F)F)[N+]([O-])=O
1582-09-8,WB,28,Cyprinodon variegatus,FT,,3.464936429,LogBCF (L/kg bdwt),FW,ArnotGobas,"Chronic Toxicity of Chlordane, Trifluralin, a Pentachlorophenol to Sheepshead Minnows (Cyprinodon variegatus)","Parrish, P.R., E.E. Dyar, J.M. Enos, a W.G. Wilson",1978,"EPA-600/3-78-010, U.S.EPA, Gulf Breeze, FL :53 p.",CCCN(CCC)C1=C(C=C(C=C1[N+]([O-])=O)C(F)(F)F)[N+]([O-])=O
1582-09-8,WB,28,Cyprinodon variegatus,FT,,3.163757524,LogBCF (L/kg bdwt),FW,ArnotGobas,"Chronic Toxicity of Chlordane, Trifluralin, a Pentachlorophenol to Sheepshead Minnows (Cyprinodon variegatus)","Parrish, P.R., E.E. Dyar, J.M. Enos, a W.G. Wilson",1978,"EPA-600/3-78-010, U.S.EPA, Gulf Breeze, FL :53 p.",CCCN(CCC)C1=C(C=C(C=C1[N+]([O-])=O)C(F)(F)F)[N+]([O-])=O
1582-09-8,WB,,N/R,,,3.729974286,LogBCF (L/kg bdwt),,ArnotGobas,The Bioconcentration of Trifluralin from a Manufacturing Effluent by Fish in the Wabash River.,"Spacie, A.",1975,Ph.D. Thesis,CCCN(CCC)C1=C(C=C(C=C1[N+]([O-])=O)C(F)(F)F)[N+]([O-])=O
1582-09-8,WB,,Moxostoma macrolepidotum,,,3.450249108,LogBCF (L/kg bdwt),,ArnotGobas,The Bioconcentration of Trifluralin from a Manufacturing Effluent by Fish in the Wabash River.,"Spacie, A.",1975,Ph.D. Thesis,CCCN(CCC)C1=C(C=C(C=C1[N+]([O-])=O)C(F)(F)F)[N+]([O-])=O
1582-09-8,WB,,N/R,,,3.230448921,LogBCF (L/kg bdwt),,ArnotGobas,The Bioconcentration of Trifluralin from a Manufacturing Effluent by Fish in the Wabash River.,"Spacie, A.",1975,Ph.D. Thesis,CCCN(CCC)C1=C(C=C(C=C1[N+]([O-])=O)C(F)(F)F)[N+]([O-])=O
1582-09-8,WB,1.6,Pimephales promelas,FT,K1/K2,3.513350799,LogBCF (L/kg bdwt),FW,ArnotGobas,Dynamics of Trifluralin Accumulation in River Fishes,"Spacie, A., a J.L. Hamelink",1979,Environ.Sci.Technol. 13(7):817-822,CCCN(CCC)C1=C(C=C(C=C1[N+]([O-])=O)C(F)(F)F)[N+]([O-])=O
15862-07-4,WB,12,Poecilia reticulata,FT,K1/K2,3.782913357,LogBCF (L/kg bdwt),FW,ArnotGobas,Bioconcentration of Polybrominated Benzenes a Biphenyls a Related Superhydrophobic Chemicals in Fish: Role of Bioavailability a Elimination into the Feces.,"Gobas, F.A.P.C., K.E. Clark, W.Y. Shiu a D. Mackay",1989,Environ. Toxicol. Chem 8:231-245,ClC1=CC(Cl)=C(C=C1Cl)C1=CC=CC=C1
15862-07-4,WB,8,Poecilia reticulata,FT,K1/K2,3.714764272,LogBCF (L/kg bdwt),FW,ArnotGobas,"Bioconcentration Kinetics of 2,4,5- Tri- a 3,3',4,4'-Tetrachlorobiphenyl a 2,4,5- Tri- a 3,3',4,4'-Tetrachlorodiphenylether in Fish","Opperhuizen, A., a P.I. Voors",1987,Chemosphere 16(10-12):2379-2388,ClC1=CC(Cl)=C(C=C1Cl)C1=CC=CC=C1
15883-57-5,WB,42,Cyprinus carpio,FT,Cb/Cw,0.3,LogBCF (L/kg bdwt),,ArnotGobas,Biodegradation a Bioconcentration of Existing Chemical Substances uer the Chemical Substances Control Law,Chemicals Evaluation a Research Institute,1992,http://qsar.cerij.or.jp/cgi-bin/DEGACC/iex.cgie,OC1=C(C=C2C=C(C=CC2=C1)S(O)(=O)=O)S(O)(=O)=O
15883-57-5,WB,42,Cyprinus carpio,FT,Cb/Cw,-0.455489533,LogBCF (L/kg bdwt),,ArnotGobas,Biodegradation a Bioconcentration of Existing Chemical Substances uer the Chemical Substances Control Law,Chemicals Evaluation a Research Institute,1992,http://qsar.cerij.or.jp/cgi-bin/DEGACC/iex.cgie,OC1=C(C=C2C=C(C=CC2=C1)S(O)(=O)=O)S(O)(=O)=O
15968-05-5,WB,30,Danio rerio,FT,K1/K2,3.85,LogBCF (L/kg bdwt),FW,ArnotGobas,Kinetics of Bioconcentration a Clearance of 28 Polychlorinated Biphenyl Congeners in Zebrafish (Brachydanio rerio),"Fox, K., G.P. Zauke, a W. Butte",1994,Ecotoxicol.Environ.Saf. 28(1):99-109,ClC1=CC=CC(Cl)=C1C1=C(Cl)C=CC=C1Cl
16219-75-3,WB,56,Cyprinus carpio,FT,Cb/Cw,2.05934356,LogBCF (L/kg bdwt),,ArnotGobas,Biodegradation a Bioconcentration of Existing Chemical Substances uer the Chemical Substances Control Law,Chemicals Evaluation a Research Institute,1992,http://qsar.cerij.or.jp/cgi-bin/DEGACC/iex.cgie,CC=C1CC2CC1C=C2
16219-75-3,WB,56,Cyprinus carpio,FT,Cb/Cw,2.041686365,LogBCF (L/kg bdwt),,ArnotGobas,Biodegradation a Bioconcentration of Existing Chemical Substances uer the Chemical Substances Control Law,Chemicals Evaluation a Research Institute,1992,http://qsar.cerij.or.jp/cgi-bin/DEGACC/iex.cgie,CC=C1CC2CC1C=C2
1623-19-4,WB,42,Cyprinus carpio,FT,Cb/Cw,0.08,LogBCF (L/kg bdwt),,ArnotGobas,Biodegradation a Bioconcentration of Existing Chemical Substances uer the Chemical Substances Control Law,Chemicals Evaluation a Research Institute,1992,http://qsar.cerij.or.jp/cgi-bin/DEGACC/iex.cgie,C=CCOP(=O)(OCC=C)OCC=C
1623-19-4,WB,42,Cyprinus carpio,FT,Cb/Cw,-0.304846384,LogBCF (L/kg bdwt),,ArnotGobas,Biodegradation a Bioconcentration of Existing Chemical Substances uer the Chemical Substances Control Law,Chemicals Evaluation a Research Institute,1992,http://qsar.cerij.or.jp/cgi-bin/DEGACC/iex.cgie,C=CCOP(=O)(OCC=C)OCC=C
1631-58-9,WB,56,Cyprinus carpio,FT,Cb/Cw,1.717571236,LogBCF (L/kg bdwt),,ArnotGobas,Biodegradation a Bioconcentration of Existing Chemical Substances uer the Chemical Substances Control Law,Chemicals Evaluation a Research Institute,1992,http://qsar.cerij.or.jp/cgi-bin/DEGACC/iex.cgie,CN(C)C1CSSC1
1631-58-9,WB,56,Cyprinus carpio,FT,Cb/Cw,1.6420918,LogBCF (L/kg bdwt),,ArnotGobas,Biodegradation a Bioconcentration of Existing Chemical Substances uer the Chemical Substances Control Law,Chemicals Evaluation a Research Institute,1992,http://qsar.cerij.or.jp/cgi-bin/DEGACC/iex.cgie,CN(C)C1CSSC1
1634-04-4,WB,28,Cyprinus carpio,FT,Cb/Cw,0.18,LogBCF (L/kg bdwt),FW,ArnotGobas,Biodegradation a Bioconcentration of alkyl ethers.,"Fujiwara, Y., Kinoshita, T., Sato, H., a Kojima, I.",1984,Yukagaku 33:111-114,COC(C)(C)C
1634-78-2,,5,Oryzias latipes,FT,Cb/Cw,0.176091259,LogBCF (L/kg bdwt),FW,ArnotGobas,"Acute Toxicity, Accumulation a Excretion of Organophosphorous Insecticides a Their Oxidation Products in Killifish","Tsuda, T., M. Kojima, H. Harada, A. Nakajima, a S. Aoki",1997,Chemosphere 35(5):939-949,CCOC(=O)CC(SP(=O)(OC)OC)C(=O)OCC
1634-78-2,,3,Oryzias latipes,FT,Cb/Cw,0.079181246,LogBCF (L/kg bdwt),FW,ArnotGobas,"Acute Toxicity, Accumulation a Excretion of Organophosphorous Insecticides a Their Oxidation Products in Killifish","Tsuda, T., M. Kojima, H. Harada, A. Nakajima, a S. Aoki",1997,Chemosphere 35(5):939-949,CCOC(=O)CC(SP(=O)(OC)OC)C(=O)OCC
1634-78-2,,2,Oryzias latipes,FT,Cb/Cw,-0.045757491,LogBCF (L/kg bdwt),FW,ArnotGobas,"Acute Toxicity, Accumulation a Excretion of Organophosphorous Insecticides a Their Oxidation Products in Killifish","Tsuda, T., M. Kojima, H. Harada, A. Nakajima, a S. Aoki",1997,Chemosphere 35(5):939-949,CCOC(=O)CC(SP(=O)(OC)OC)C(=O)OCC
1634-78-2,,7.01,Oryzias latipes,FT,Cb/Cw,-0.096910013,LogBCF (L/kg bdwt),FW,ArnotGobas,"Acute Toxicity, Accumulation a Excretion of Organophosphorous Insecticides a Their Oxidation Products in Killifish","Tsuda, T., M. Kojima, H. Harada, A. Nakajima, a S. Aoki",1997,Chemosphere 35(5):939-949,CCOC(=O)CC(SP(=O)(OC)OC)C(=O)OCC
1634-78-2,WB,0.5,Oryzias latipes,FT,Cb/Cw,-0.397940009,LogBCF (L/kg bdwt),FW,ArnotGobas,"Acute Toxicity, Accumulation a Excretion of Organophosphorous Insecticides a Their Oxidation Products in Killifish","Tsuda, T., M. Kojima, H. Harada, A. Nakajima, a S. Aoki",1997,Chemosphere 35(5):939-949,CCOC(=O)CC(SP(=O)(OC)OC)C(=O)OCC
1634-78-2,WB,0.25,Oryzias latipes,FT,Cb/Cw,-0.522878745,LogBCF (L/kg bdwt),FW,ArnotGobas,"Acute Toxicity, Accumulation a Excretion of Organophosphorous Insecticides a Their Oxidation Products in Killifish","Tsuda, T., M. Kojima, H. Harada, A. Nakajima, a S. Aoki",1997,Chemosphere 35(5):939-949,CCOC(=O)CC(SP(=O)(OC)OC)C(=O)OCC
1634-78-2,WB,1,Oryzias latipes,FT,Cb/Cw,-0.522878745,LogBCF (L/kg bdwt),FW,ArnotGobas,"Acute Toxicity, Accumulation a Excretion of Organophosphorous Insecticides a Their Oxidation Products in Killifish","Tsuda, T., M. Kojima, H. Harada, A. Nakajima, a S. Aoki",1997,Chemosphere 35(5):939-949,CCOC(=O)CC(SP(=O)(OC)OC)C(=O)OCC
16605-91-7,WB,75,Oncorhynchus mykiss,FT,Cb/Cw,4.113943352,LogBCF (L/kg bdwt),FW,ArnotGobas,Bioconcentration Factors of Some Halogenated Organics for Rainbow Trout: Limitations in Their Use for Prediction of Environmental Residues,"Oliver, B.G., a A.J. Niimi",1985,Environ.Sci.Technol. 19(9):842-849,ClC1=CC=CC(=C1Cl)C1=CC=CC=C1
16605-91-7,WB,50,Oncorhynchus mykiss,FT,Cb/Cw,4.041392685,LogBCF (L/kg bdwt),FW,ArnotGobas,Bioconcentration Factors of Some Halogenated Organics for Rainbow Trout: Limitations in Their Use for Prediction of Environmental Residues,"Oliver, B.G., a A.J. Niimi",1985,Environ.Sci.Technol. 19(9):842-849,ClC1=CC=CC(=C1Cl)C1=CC=CC=C1
16605-91-7,WB,96,Oncorhynchus mykiss,FT,Cb/Cw,4.079181246,LogBCF (L/kg bdwt),FW,ArnotGobas,Bioconcentration Factors of Some Halogenated Organics for Rainbow Trout: Limitations in Their Use for Prediction of Environmental Residues,"Oliver, B.G., a A.J. Niimi",1985,Environ.Sci.Technol. 19(9):842-849,ClC1=CC=CC(=C1Cl)C1=CC=CC=C1
16606-02-3,WB,8,Poecilia reticulata,FT,Cb/Cw,4.15,LogBCF (L/kg bdwt),FW,ArnotGobas,Bioaccumulation of Some Polychlorinated Dibenzo-p-Dioxins a Octachlorodibenzofuran in the Guppy (Poecilia reticulata),"Gobas, F.A.P.C., a S.M. Schrap",1990,Chemosphere 20(5):495-512,ClC1=CC=C(C=C1)C1=CC(Cl)=CC=C1Cl
16606-02-3,WB,30,Danio rerio,FT,K1/K2,4.66,LogBCF (L/kg bdwt),FW,ArnotGobas,Kinetics of Bioconcentration a Clearance of 28 Polychlorinated Biphenyl Congeners in Zebrafish (Brachydanio rerio),"Fox, K., G.P. Zauke, a W. Butte",1994,Ecotoxicol.Environ.Saf. 28(1):99-109,ClC1=CC=C(C=C1)C1=CC(Cl)=CC=C1Cl
16766-29-3,WB,28,Brachydanio rerio,R,Cb/Cw,3.5,LogBCF (L/kg bdwt),FW,ArnotGobas,"Tri- a Tetra-chloroveratrole, Metabolites Produced by bacterial o-Methylation of Tri- a Tetra-Chloroguaiacol: An Assessment of their Bioconcentration Potential a their Effects on Fish Reproduction","Neilson, A.H., A.-S. Allard, S. Reila, S. Remberger, M. Tarnholm, A. Viktor a L. Laner",1984,Can. J. Fish. Aquat. Sci. 41:1502-1512,COC1=CC(Cl)=C(Cl)C(Cl)=C1OC
1687-30-5,WB,42,Cyprinus carpio,FT,Cb/Cw,0.3,LogBCF (L/kg bdwt),,ArnotGobas,Biodegradation a Bioconcentration of Existing Chemical Substances uer the Chemical Substances Control Law,Chemicals Evaluation a Research Institute,1992,http://qsar.cerij.or.jp/cgi-bin/DEGACC/iex.cgie,OC(=O)C1CCCCC1C(O)=O
1687-30-5,WB,42,Cyprinus carpio,FT,Cb/Cw,-0.7,LogBCF (L/kg bdwt),,ArnotGobas,Biodegradation a Bioconcentration of Existing Chemical Substances uer the Chemical Substances Control Law,Chemicals Evaluation a Research Institute,1992,http://qsar.cerij.or.jp/cgi-bin/DEGACC/iex.cgie,OC(=O)C1CCCCC1C(O)=O
17109-49-8,WB,5,Oryzias latipes,FT,Cb/Cw,1.755112266,LogBCF (L/kg bdwt),FW,ArnotGobas,Relationships of Bioconcentration Factors of Organophosphate Pesticides Among Species of Fish,"Tsuda, T., M. Kojima, H. Harada, A. Nakajima, a S. Aoki",1997,Comp.Biochem.Physiol.C 116(3):213-218,CCOP(=O)(SC1=CC=CC=C1)SC1=CC=CC=C1
17109-49-8,WB,0.25,Carassius auratus,FT,Cb/Cw,1.540329475,LogBCF (L/kg bdwt),FW,ArnotGobas,Relationships of Bioconcentration Factors of Organophosphate Pesticides Among Species of Fish,"Tsuda, T., M. Kojima, H. Harada, A. Nakajima, a S. Aoki",1997,Comp.Biochem.Physiol.C 116(3):213-218,CCOP(=O)(SC1=CC=CC=C1)SC1=CC=CC=C1
17109-49-8,WB,5,Poecilia reticulata,FT,Cb/Cw,1.671172843,LogBCF (L/kg bdwt),FW,ArnotGobas,Relationships of Bioconcentration Factors of Organophosphate Pesticides Among Species of Fish,"Tsuda, T., M. Kojima, H. Harada, A. Nakajima, a S. Aoki",1997,Comp.Biochem.Physiol.C 116(3):213-218,CCOP(=O)(SC1=CC=CC=C1)SC1=CC=CC=C1
17109-49-8,WB,3,Carassius auratus,FT,Cb/Cw,1.519827994,LogBCF (L/kg bdwt),FW,ArnotGobas,Relationships of Bioconcentration Factors of Organophosphate Pesticides Among Species of Fish,"Tsuda, T., M. Kojima, H. Harada, A. Nakajima, a S. Aoki",1997,Comp.Biochem.Physiol.C 116(3):213-218,CCOP(=O)(SC1=CC=CC=C1)SC1=CC=CC=C1
17109-49-8,WB,7.01,Poecilia reticulata,FT,Cb/Cw,1.664641976,LogBCF (L/kg bdwt),FW,ArnotGobas,Relationships of Bioconcentration Factors of Organophosphate Pesticides Among Species of Fish,"Tsuda, T., M. Kojima, H. Harada, A. Nakajima, a S. Aoki",1997,Comp.Biochem.Physiol.C 116(3):213-218,CCOP(=O)(SC1=CC=CC=C1)SC1=CC=CC=C1
17109-49-8,WB,7.01,Carassius auratus,FT,Cb/Cw,1.471291711,LogBCF (L/kg bdwt),FW,ArnotGobas,Relationships of Bioconcentration Factors of Organophosphate Pesticides Among Species of Fish,"Tsuda, T., M. Kojima, H. Harada, A. Nakajima, a S. Aoki",1997,Comp.Biochem.Physiol.C 116(3):213-218,CCOP(=O)(SC1=CC=CC=C1)SC1=CC=CC=C1
17109-49-8,WB,5,Carassius auratus,FT,Cb/Cw,1.457881897,LogBCF (L/kg bdwt),FW,ArnotGobas,Relationships of Bioconcentration Factors of Organophosphate Pesticides Among Species of Fish,"Tsuda, T., M. Kojima, H. Harada, A. Nakajima, a S. Aoki",1997,Comp.Biochem.Physiol.C 116(3):213-218,CCOP(=O)(SC1=CC=CC=C1)SC1=CC=CC=C1
17109-49-8,WB,0.5,Carassius auratus,FT,Cb/Cw,1.456366033,LogBCF (L/kg bdwt),FW,ArnotGobas,Relationships of Bioconcentration Factors of Organophosphate Pesticides Among Species of Fish,"Tsuda, T., M. Kojima, H. Harada, A. Nakajima, a S. Aoki",1997,Comp.Biochem.Physiol.C 116(3):213-218,CCOP(=O)(SC1=CC=CC=C1)SC1=CC=CC=C1
17109-49-8,WB,3,Poecilia reticulata,FT,Cb/Cw,1.598790507,LogBCF (L/kg bdwt),FW,ArnotGobas,Relationships of Bioconcentration Factors of Organophosphate Pesticides Among Species of Fish,"Tsuda, T., M. Kojima, H. Harada, A. Nakajima, a S. Aoki",1997,Comp.Biochem.Physiol.C 116(3):213-218,CCOP(=O)(SC1=CC=CC=C1)SC1=CC=CC=C1
17109-49-8,WB,5,Poecilia reticulata,FT,Cb/Cw,1.557507202,LogBCF (L/kg bdwt),FW,ArnotGobas,Relationships of Bioconcentration Factors of Organophosphate Pesticides Among Species of Fish,"Tsuda, T., M. Kojima, H. Harada, A. Nakajima, a S. Aoki",1997,Comp.Biochem.Physiol.C 116(3):213-218,CCOP(=O)(SC1=CC=CC=C1)SC1=CC=CC=C1
17109-49-8,WB,3,Poecilia reticulata,FT,Cb/Cw,1.532754379,LogBCF (L/kg bdwt),FW,ArnotGobas,Relationships of Bioconcentration Factors of Organophosphate Pesticides Among Species of Fish,"Tsuda, T., M. Kojima, H. Harada, A. Nakajima, a S. Aoki",1997,Comp.Biochem.Physiol.C 116(3):213-218,CCOP(=O)(SC1=CC=CC=C1)SC1=CC=CC=C1
17109-49-8,WB,7.01,Oryzias latipes,FT,Cb/Cw,1.506505032,LogBCF (L/kg bdwt),FW,ArnotGobas,Relationships of Bioconcentration Factors of Organophosphate Pesticides Among Species of Fish,"Tsuda, T., M. Kojima, H. Harada, A. Nakajima, a S. Aoki",1997,Comp.Biochem.Physiol.C 116(3):213-218,CCOP(=O)(SC1=CC=CC=C1)SC1=CC=CC=C1
17109-49-8,WB,7.01,Poecilia reticulata,FT,Cb/Cw,1.44870632,LogBCF (L/kg bdwt),FW,ArnotGobas,Relationships of Bioconcentration Factors of Organophosphate Pesticides Among Species of Fish,"Tsuda, T., M. Kojima, H. Harada, A. Nakajima, a S. Aoki",1997,Comp.Biochem.Physiol.C 116(3):213-218,CCOP(=O)(SC1=CC=CC=C1)SC1=CC=CC=C1
17109-49-8,WB,1,Carassius auratus,FT,Cb/Cw,1.322219295,LogBCF (L/kg bdwt),FW,ArnotGobas,Relationships of Bioconcentration Factors of Organophosphate Pesticides Among Species of Fish,"Tsuda, T., M. Kojima, H. Harada, A. Nakajima, a S. Aoki",1997,Comp.Biochem.Physiol.C 116(3):213-218,CCOP(=O)(SC1=CC=CC=C1)SC1=CC=CC=C1
17109-49-8,WB,3,Oryzias latipes,FT,Cb/Cw,1.440909082,LogBCF (L/kg bdwt),FW,ArnotGobas,Relationships of Bioconcentration Factors of Organophosphate Pesticides Among Species of Fish,"Tsuda, T., M. Kojima, H. Harada, A. Nakajima, a S. Aoki",1997,Comp.Biochem.Physiol.C 116(3):213-218,CCOP(=O)(SC1=CC=CC=C1)SC1=CC=CC=C1
17109-49-8,WB,3,Tanichthys albonubes,FT,Cb/Cw,1.495544338,LogBCF (L/kg bdwt),FW,ArnotGobas,Relationships of Bioconcentration Factors of Organophosphate Pesticides Among Species of Fish,"Tsuda, T., M. Kojima, H. Harada, A. Nakajima, a S. Aoki",1997,Comp.Biochem.Physiol.C 116(3):213-218,CCOP(=O)(SC1=CC=CC=C1)SC1=CC=CC=C1
17109-49-8,WB,1,Poecilia reticulata,FT,Cb/Cw,1.365487985,LogBCF (L/kg bdwt),FW,ArnotGobas,Relationships of Bioconcentration Factors of Organophosphate Pesticides Among Species of Fish,"Tsuda, T., M. Kojima, H. Harada, A. Nakajima, a S. Aoki",1997,Comp.Biochem.Physiol.C 116(3):213-218,CCOP(=O)(SC1=CC=CC=C1)SC1=CC=CC=C1
17109-49-8,WB,0.5,Poecilia reticulata,FT,Cb/Cw,1.346352974,LogBCF (L/kg bdwt),FW,ArnotGobas,Relationships of Bioconcentration Factors of Organophosphate Pesticides Among Species of Fish,"Tsuda, T., M. Kojima, H. Harada, A. Nakajima, a S. Aoki",1997,Comp.Biochem.Physiol.C 116(3):213-218,CCOP(=O)(SC1=CC=CC=C1)SC1=CC=CC=C1
17109-49-8,WB,1,Tanichthys albonubes,FT,Cb/Cw,1.436162647,LogBCF (L/kg bdwt),FW,ArnotGobas,Relationships of Bioconcentration Factors of Organophosphate Pesticides Among Species of Fish,"Tsuda, T., M. Kojima, H. Harada, A. Nakajima, a S. Aoki",1997,Comp.Biochem.Physiol.C 116(3):213-218,CCOP(=O)(SC1=CC=CC=C1)SC1=CC=CC=C1
17109-49-8,WB,1,Poecilia reticulata,FT,Cb/Cw,1.330413773,LogBCF (L/kg bdwt),FW,ArnotGobas,Relationships of Bioconcentration Factors of Organophosphate Pesticides Among Species of Fish,"Tsuda, T., M. Kojima, H. Harada, A. Nakajima, a S. Aoki",1997,Comp.Biochem.Physiol.C 116(3):213-218,CCOP(=O)(SC1=CC=CC=C1)SC1=CC=CC=C1
17109-49-8,WB,0.5,Poecilia reticulata,FT,Cb/Cw,1.320146286,LogBCF (L/kg bdwt),FW,ArnotGobas,Relationships of Bioconcentration Factors of Organophosphate Pesticides Among Species of Fish,"Tsuda, T., M. Kojima, H. Harada, A. Nakajima, a S. Aoki",1997,Comp.Biochem.Physiol.C 116(3):213-218,CCOP(=O)(SC1=CC=CC=C1)SC1=CC=CC=C1
17109-49-8,WB,0.25,Poecilia reticulata,FT,Cb/Cw,1.303196057,LogBCF (L/kg bdwt),FW,ArnotGobas,Relationships of Bioconcentration Factors of Organophosphate Pesticides Among Species of Fish,"Tsuda, T., M. Kojima, H. Harada, A. Nakajima, a S. Aoki",1997,Comp.Biochem.Physiol.C 116(3):213-218,CCOP(=O)(SC1=CC=CC=C1)SC1=CC=CC=C1
17109-49-8,WB,1,Oryzias latipes,FT,Cb/Cw,1.322219295,LogBCF (L/kg bdwt),FW,ArnotGobas,Relationships of Bioconcentration Factors of Organophosphate Pesticides Among Species of Fish,"Tsuda, T., M. Kojima, H. Harada, A. Nakajima, a S. Aoki",1997,Comp.Biochem.Physiol.C 116(3):213-218,CCOP(=O)(SC1=CC=CC=C1)SC1=CC=CC=C1
17109-49-8,WB,0.5,Oryzias latipes,FT,Cb/Cw,1.294466226,LogBCF (L/kg bdwt),FW,ArnotGobas,Relationships of Bioconcentration Factors of Organophosphate Pesticides Among Species of Fish,"Tsuda, T., M. Kojima, H. Harada, A. Nakajima, a S. Aoki",1997,Comp.Biochem.Physiol.C 116(3):213-218,CCOP(=O)(SC1=CC=CC=C1)SC1=CC=CC=C1
17109-49-8,WB,0.25,Oryzias latipes,FT,Cb/Cw,1.120573931,LogBCF (L/kg bdwt),FW,ArnotGobas,Relationships of Bioconcentration Factors of Organophosphate Pesticides Among Species of Fish,"Tsuda, T., M. Kojima, H. Harada, A. Nakajima, a S. Aoki",1997,Comp.Biochem.Physiol.C 116(3):213-218,CCOP(=O)(SC1=CC=CC=C1)SC1=CC=CC=C1
17109-49-8,WB,0.5,Tanichthys albonubes,FT,Cb/Cw,1.017033339,LogBCF (L/kg bdwt),FW,ArnotGobas,Relationships of Bioconcentration Factors of Organophosphate Pesticides Among Species of Fish,"Tsuda, T., M. Kojima, H. Harada, A. Nakajima, a S. Aoki",1997,Comp.Biochem.Physiol.C 116(3):213-218,CCOP(=O)(SC1=CC=CC=C1)SC1=CC=CC=C1
17109-49-8,WB,0.25,Tanichthys albonubes,FT,Cb/Cw,0.857332496,LogBCF (L/kg bdwt),FW,ArnotGobas,Relationships of Bioconcentration Factors of Organophosphate Pesticides Among Species of Fish,"Tsuda, T., M. Kojima, H. Harada, A. Nakajima, a S. Aoki",1997,Comp.Biochem.Physiol.C 116(3):213-218,CCOP(=O)(SC1=CC=CC=C1)SC1=CC=CC=C1
1712-70-5,WB,56,Cyprinus carpio,FT,Cb/Cw,2.842455842,LogBCF (L/kg bdwt),,ArnotGobas,Biodegradation a Bioconcentration of Existing Chemical Substances uer the Chemical Substances Control Law,Chemicals Evaluation a Research Institute,1992,http://qsar.cerij.or.jp/cgi-bin/DEGACC/iex.cgie,CC(=C)C1=CC=C(Cl)C=C1
1712-70-5,WB,56,Cyprinus carpio,FT,Cb/Cw,2.838769142,LogBCF (L/kg bdwt),,ArnotGobas,Biodegradation a Bioconcentration of Existing Chemical Substances uer the Chemical Substances Control Law,Chemicals Evaluation a Research Institute,1992,http://qsar.cerij.or.jp/cgi-bin/DEGACC/iex.cgie,CC(=C)C1=CC=C(Cl)C=C1
174300-34-6,WB,2,Oryzias latipes,FT,Cb/Cw,0,LogBCF (L/kg bdwt),FW,ArnotGobas,"Acute Toxicity, Accumulation a Excretion of Isoprothiolane a Its Degradation Products in Killifish","Tsuda, T., M. Kojima, H. Harada, A. Nakajima, a S. Aoki",1997,Water Res. 31(2):323-327,CC(C)OC(=O)C(Cl)(Cl)C(=O)OC(C)C
174300-34-6,WB,0.5,Oryzias latipes,FT,Cb/Cw,-0.045757491,LogBCF (L/kg bdwt),FW,ArnotGobas,"Acute Toxicity, Accumulation a Excretion of Isoprothiolane a Its Degradation Products in Killifish","Tsuda, T., M. Kojima, H. Harada, A. Nakajima, a S. Aoki",1997,Water Res. 31(2):323-327,CC(C)OC(=O)C(Cl)(Cl)C(=O)OC(C)C
174300-34-6,WB,1,Oryzias latipes,FT,Cb/Cw,-0.15490196,LogBCF (L/kg bdwt),FW,ArnotGobas,"Acute Toxicity, Accumulation a Excretion of Isoprothiolane a Its Degradation Products in Killifish","Tsuda, T., M. Kojima, H. Harada, A. Nakajima, a S. Aoki",1997,Water Res. 31(2):323-327,CC(C)OC(=O)C(Cl)(Cl)C(=O)OC(C)C
174300-34-6,WB,3,Oryzias latipes,FT,Cb/Cw,-0.193820026,LogBCF (L/kg bdwt),FW,ArnotGobas,"Acute Toxicity, Accumulation a Excretion of Isoprothiolane a Its Degradation Products in Killifish","Tsuda, T., M. Kojima, H. Harada, A. Nakajima, a S. Aoki",1997,Water Res. 31(2):323-327,CC(C)OC(=O)C(Cl)(Cl)C(=O)OC(C)C
174300-34-6,WB,5,Oryzias latipes,FT,Cb/Cw,-0.236572006,LogBCF (L/kg bdwt),FW,ArnotGobas,"Acute Toxicity, Accumulation a Excretion of Isoprothiolane a Its Degradation Products in Killifish","Tsuda, T., M. Kojima, H. Harada, A. Nakajima, a S. Aoki",1997,Water Res. 31(2):323-327,CC(C)OC(=O)C(Cl)(Cl)C(=O)OC(C)C
174300-34-6,WB,7.01,Oryzias latipes,FT,Cb/Cw,-0.366531544,LogBCF (L/kg bdwt),FW,ArnotGobas,"Acute Toxicity, Accumulation a Excretion of Isoprothiolane a Its Degradation Products in Killifish","Tsuda, T., M. Kojima, H. Harada, A. Nakajima, a S. Aoki",1997,Water Res. 31(2):323-327,CC(C)OC(=O)C(Cl)(Cl)C(=O)OC(C)C
174300-34-6,WB,0.25,Oryzias latipes,FT,Cb/Cw,-0.522878745,LogBCF (L/kg bdwt),FW,ArnotGobas,"Acute Toxicity, Accumulation a Excretion of Isoprothiolane a Its Degradation Products in Killifish","Tsuda, T., M. Kojima, H. Harada, A. Nakajima, a S. Aoki",1997,Water Res. 31(2):323-327,CC(C)OC(=O)C(Cl)(Cl)C(=O)OC(C)C
1746-01-6,WB,28,Oncorhynchus mykiss,FT,K1/K2,4.591064607,LogBCF (L/kg bdwt),FW,ArnotGobas,"Toxicity a Bioconcentration of 2,3,7,8-Tetrachlorodibenzodioxin a 2,3,7,8-Tetrachlorodibenzofuran in Rainbow Trout","Mehrle, P.M., D.R. Buckler, E.E. Little, L.M. Smith, J.D. Petty, P.H. Peterman, D.L. Stalling, G.M. De Graeve, J.J. Coyl",1988,Environ.Toxicol.Chem. 7(1):47-62,ClC1=CC2=C(OC3=CC(Cl)=C(Cl)C=C3O2)C=C1Cl
1746-01-6,WB,28,Oncorhynchus mykiss,FT,K1/K2,4.574725584,LogBCF (L/kg bdwt),FW,ArnotGobas,"Toxicity a Bioconcentration of 2,3,7,8-Tetrachlorodibenzodioxin a 2,3,7,8-Tetrachlorodibenzofuran in Rainbow Trout","Mehrle, P.M., D.R. Buckler, E.E. Little, L.M. Smith, J.D. Petty, P.H. Peterman, D.L. Stalling, G.M. De Graeve, J.J. Coyl",1988,Environ.Toxicol.Chem. 7(1):47-62,ClC1=CC2=C(OC3=CC(Cl)=C(Cl)C=C3O2)C=C1Cl
1746-01-6,WB,28,Oncorhynchus mykiss,FT,K1/K2,4.563919904,LogBCF (L/kg bdwt),FW,ArnotGobas,"Toxicity a Bioconcentration of 2,3,7,8-Tetrachlorodibenzodioxin a 2,3,7,8-Tetrachlorodibenzofuran in Rainbow Trout","Mehrle, P.M., D.R. Buckler, E.E. Little, L.M. Smith, J.D. Petty, P.H. Peterman, D.L. Stalling, G.M. De Graeve, J.J. Coyl",1988,Environ.Toxicol.Chem. 7(1):47-62,ClC1=CC2=C(OC3=CC(Cl)=C(Cl)C=C3O2)C=C1Cl
17700-09-3,WB,5,Oncorhynchus mykiss,FT,Cb/Cw,2.315970345,LogBCF (L/kg bdwt),FW,ArnotGobas,Octanol/Water Partition Coefficients a Bioconcentration Factors of Chloronitrobenzenes in Rainbow Trout (Salmo gairdneri),"Niimi, A.J., H.B. Lee, a G.P. Kissoon",1989,Environ.Toxicol.Chem. 8(9):817-823,[O-][N+](=O)C1=CC=C(Cl)C(Cl)=C1Cl
17700-09-3,WB,36,Oncorhynchus mykiss,FT,Cb/Cw,2.255272505,LogBCF (L/kg bdwt),FW,ArnotGobas,Octanol/Water Partition Coefficients a Bioconcentration Factors of Chloronitrobenzenes in Rainbow Trout (Salmo gairdneri),"Niimi, A.J., H.B. Lee, a G.P. Kissoon",1989,Environ.Toxicol.Chem. 8(9):817-823,[O-][N+](=O)C1=CC=C(Cl)C(Cl)=C1Cl
17700-09-3,WB,20,Oncorhynchus mykiss,FT,Cb/Cw,2.1430148,LogBCF (L/kg bdwt),FW,ArnotGobas,Octanol/Water Partition Coefficients a Bioconcentration Factors of Chloronitrobenzenes in Rainbow Trout (Salmo gairdneri),"Niimi, A.J., H.B. Lee, a G.P. Kissoon",1989,Environ.Toxicol.Chem. 8(9):817-823,[O-][N+](=O)C1=CC=C(Cl)C(Cl)=C1Cl
17700-09-3,WB,12,Oncorhynchus mykiss,FT,Cb/Cw,2.139879086,LogBCF (L/kg bdwt),FW,ArnotGobas,Octanol/Water Partition Coefficients a Bioconcentration Factors of Chloronitrobenzenes in Rainbow Trout (Salmo gairdneri),"Niimi, A.J., H.B. Lee, a G.P. Kissoon",1989,Environ.Toxicol.Chem. 8(9):817-823,[O-][N+](=O)C1=CC=C(Cl)C(Cl)=C1Cl
17700-09-3,WB,28,Oncorhynchus mykiss,FT,Cb/Cw,2.071882007,LogBCF (L/kg bdwt),FW,ArnotGobas,Octanol/Water Partition Coefficients a Bioconcentration Factors of Chloronitrobenzenes in Rainbow Trout (Salmo gairdneri),"Niimi, A.J., H.B. Lee, a G.P. Kissoon",1989,Environ.Toxicol.Chem. 8(9):817-823,[O-][N+](=O)C1=CC=C(Cl)C(Cl)=C1Cl
1805-32-9,WB,42,Cyprinus carpio,FT,Cb/Cw,0.45,LogBCF (L/kg bdwt),,ArnotGobas,Biodegradation a Bioconcentration of Existing Chemical Substances uer the Chemical Substances Control Law,Chemicals Evaluation a Research Institute,1992,http://qsar.cerij.or.jp/cgi-bin/DEGACC/iex.cgie,OCC1=CC=C(Cl)C(Cl)=C1
1805-32-9,WB,42,Cyprinus carpio,FT,Cb/Cw,0.4120918,LogBCF (L/kg bdwt),,ArnotGobas,Biodegradation a Bioconcentration of Existing Chemical Substances uer the Chemical Substances Control Law,Chemicals Evaluation a Research Institute,1992,http://qsar.cerij.or.jp/cgi-bin/DEGACC/iex.cgie,OCC1=CC=C(Cl)C(Cl)=C1
18181-70-9,WB,7.01,Poecilia reticulata,FT,Cb/Cw,3.624455366,LogBCF (L/kg bdwt),FW,ArnotGobas,Uptake a Elimination Kinetics of Organophosphorous Pesticides in the Guppy (Poecilia reticulata): Correlations with the Octanol/Water Partition,"De Bruijn, J., a J. Hermens",1991,Environ.Toxicol.Chem. 10(6):791-804,COP(=S)(OC)OC1=CC(Cl)=C(I)C=C1Cl
1825-21-4,WB,96,Oncorhynchus mykiss,FT,Cb/Cw,4.380211242,LogBCF (L/kg bdwt),FW,ArnotGobas,Bioconcentration Factors of Some Halogenated Organics for Rainbow Trout: Limitations in Their Use for Prediction of Environmental Residues,"Oliver, B.G., a A.J. Niimi",1985,Environ.Sci.Technol. 19(9):842-849,COC1=C(Cl)C(Cl)=C(Cl)C(Cl)=C1Cl
1825-21-4,WB,50,Oncorhynchus mykiss,FT,Cb/Cw,4.301029996,LogBCF (L/kg bdwt),FW,ArnotGobas,Bioconcentration Factors of Some Halogenated Organics for Rainbow Trout: Limitations in Their Use for Prediction of Environmental Residues,"Oliver, B.G., a A.J. Niimi",1985,Environ.Sci.Technol. 19(9):842-849,COC1=C(Cl)C(Cl)=C(Cl)C(Cl)=C1Cl
1825-21-4,WB,96,Oncorhynchus mykiss,FT,Cb/Cw,4.230448921,LogBCF (L/kg bdwt),FW,ArnotGobas,Bioconcentration Factors of Some Halogenated Organics for Rainbow Trout: Limitations in Their Use for Prediction of Environmental Residues,"Oliver, B.G., a A.J. Niimi",1985,Environ.Sci.Technol. 19(9):842-849,COC1=C(Cl)C(Cl)=C(Cl)C(Cl)=C1Cl
1825-21-4,WB,75,Oncorhynchus mykiss,FT,Cb/Cw,4.176091259,LogBCF (L/kg bdwt),FW,ArnotGobas,Bioconcentration Factors of Some Halogenated Organics for Rainbow Trout: Limitations in Their Use for Prediction of Environmental Residues,"Oliver, B.G., a A.J. Niimi",1985,Environ.Sci.Technol. 19(9):842-849,COC1=C(Cl)C(Cl)=C(Cl)C(Cl)=C1Cl
1825-21-4,WB,35,Oncorhynchus mykiss,FT,Cb/Cw,4.204119983,LogBCF (L/kg bdwt),FW,ArnotGobas,Bioconcentration Factors of Some Halogenated Organics for Rainbow Trout: Limitations in Their Use for Prediction of Environmental Residues,"Oliver, B.G., a A.J. Niimi",1985,Environ.Sci.Technol. 19(9):842-849,COC1=C(Cl)C(Cl)=C(Cl)C(Cl)=C1Cl
1825-21-4,WB,50,Oncorhynchus mykiss,FT,Cb/Cw,4.146128036,LogBCF (L/kg bdwt),FW,ArnotGobas,Bioconcentration Factors of Some Halogenated Organics for Rainbow Trout: Limitations in Their Use for Prediction of Environmental Residues,"Oliver, B.G., a A.J. Niimi",1985,Environ.Sci.Technol. 19(9):842-849,COC1=C(Cl)C(Cl)=C(Cl)C(Cl)=C1Cl
1825-21-4,WB,75,Oncorhynchus mykiss,FT,Cb/Cw,4.079181246,LogBCF (L/kg bdwt),FW,ArnotGobas,Bioconcentration Factors of Some Halogenated Organics for Rainbow Trout: Limitations in Their Use for Prediction of Environmental Residues,"Oliver, B.G., a A.J. Niimi",1985,Environ.Sci.Technol. 19(9):842-849,COC1=C(Cl)C(Cl)=C(Cl)C(Cl)=C1Cl
1825-21-4,WB,35,Oncorhynchus mykiss,FT,Cb/Cw,4.041392685,LogBCF (L/kg bdwt),FW,ArnotGobas,Bioconcentration Factors of Some Halogenated Organics for Rainbow Trout: Limitations in Their Use for Prediction of Environmental Residues,"Oliver, B.G., a A.J. Niimi",1985,Environ.Sci.Technol. 19(9):842-849,COC1=C(Cl)C(Cl)=C(Cl)C(Cl)=C1Cl
1825-21-4,WB,7,Poecilia reticulata,FT,K1/K2,3.727846132,LogBCF (L/kg bdwt),FW,ArnotGobas,Uptake a Elimination of Polychlorinated Aromatic Ethers by Fish: Chloroanisoles,"Opperhuizen, A. a P.I. Voors",1987,Chemosphere 16(5):953-962,COC1=C(Cl)C(Cl)=C(Cl)C(Cl)=C1Cl
1825-31-6,WB,90,Oncorhynchus mykiss,FT,Cb/Cw,3.75,LogBCF (L/kg bdwt),FW,ArnotGobas,The Relationship Between Bioconcentration Factor in Rainbow Trout a Physical-Chemical Properties for some Halogenated Compous.,"Oliver, B.G.",1984,In: QSAR in Environmental Toxicology :300-317,ClC1=CC=C(Cl)C2=CC=CC=C12
1836-77-7,WB,56,Cyprinus carpio,FT,Cb/Cw,3.447158031,LogBCF (L/kg bdwt),,ArnotGobas,Biodegradation a Bioconcentration of Existing Chemical Substances uer the Chemical Substances Control Law,National Institute of Technology a Evaluation,2005,http://www.nite.go.jp/iex-e.html,[O-][N+](=O)C1=CC=C(OC2=C(Cl)C=C(Cl)C=C2Cl)C=C1
1836-77-7,WB,56,Cyprinus carpio,FT,Cb/Cw,3.113943352,LogBCF (L/kg bdwt),,ArnotGobas,Biodegradation a Bioconcentration of Existing Chemical Substances uer the Chemical Substances Control Law,National Institute of Technology a Evaluation,2005,http://www.nite.go.jp/iex-e.html,[O-][N+](=O)C1=CC=C(OC2=C(Cl)C=C(Cl)C=C2Cl)C=C1
1836-77-7,WB,14,Gnathopogon coerulescens,FT,Cb/Cw,3.77524626,LogBCF (L/kg bdwt),FW,ArnotGobas,"Accumulation a Excretion of Oxadiazon, CNP, a Chlomethoxynil by Willow Shiner","Tsuda, T.S.A., M. Kojima, a H. Harada",1990,Comp.Biochem.Physiol.C 96(2):373-375,[O-][N+](=O)C1=CC=C(OC2=C(Cl)C=C(Cl)C=C2Cl)C=C1
1836-77-7,WB,10,Gnathopogon coerulescens,FT,Cb/Cw,3.762528522,LogBCF (L/kg bdwt),FW,ArnotGobas,"Accumulation a Excretion of Oxadiazon, CNP, a Chlomethoxynil by Willow Shiner","Tsuda, T.S.A., M. Kojima, a H. Harada",1990,Comp.Biochem.Physiol.C 96(2):373-375,[O-][N+](=O)C1=CC=C(OC2=C(Cl)C=C(Cl)C=C2Cl)C=C1
1836-77-7,WB,7,Gnathopogon coerulescens,FT,Cb/Cw,3.725911632,LogBCF (L/kg bdwt),FW,ArnotGobas,"Accumulation a Excretion of Oxadiazon, CNP, a Chlomethoxynil by Willow Shiner","Tsuda, T.S.A., M. Kojima, a H. Harada",1990,Comp.Biochem.Physiol.C 96(2):373-375,[O-][N+](=O)C1=CC=C(OC2=C(Cl)C=C(Cl)C=C2Cl)C=C1
18708-70-8,WB,56,Cyprinus carpio,FT,Cb/Cw,2.47038257,LogBCF (L/kg bdwt),,ArnotGobas,Biodegradation a Bioconcentration of Existing Chemical Substances uer the Chemical Substances Control Law,Chemicals Evaluation a Research Institute,1992,http://qsar.cerij.or.jp/cgi-bin/DEGACC/iex.cgie,[O-][N+](=O)C1=C(Cl)C=C(Cl)C=C1Cl
18708-70-8,WB,56,Cyprinus carpio,FT,Cb/Cw,2.406176972,LogBCF (L/kg bdwt),,ArnotGobas,Biodegradation a Bioconcentration of Existing Chemical Substances uer the Chemical Substances Control Law,Chemicals Evaluation a Research Institute,1992,http://qsar.cerij.or.jp/cgi-bin/DEGACC/iex.cgie,[O-][N+](=O)C1=C(Cl)C=C(Cl)C=C1Cl
18708-70-8,WB,5,Oncorhynchus mykiss,FT,Cb/Cw,2.980457892,LogBCF (L/kg bdwt),FW,ArnotGobas,Octanol/Water Partition Coefficients a Bioconcentration Factors of Chloronitrobenzenes in Rainbow Trout (Salmo gairdneri),"Niimi, A.J., H.B. Lee, a G.P. Kissoon",1989,Environ.Toxicol.Chem. 8(9):817-823,[O-][N+](=O)C1=C(Cl)C=C(Cl)C=C1Cl
18708-70-8,WB,36,Oncorhynchus mykiss,FT,Cb/Cw,2.937517892,LogBCF (L/kg bdwt),FW,ArnotGobas,Octanol/Water Partition Coefficients a Bioconcentration Factors of Chloronitrobenzenes in Rainbow Trout (Salmo gairdneri),"Niimi, A.J., H.B. Lee, a G.P. Kissoon",1989,Environ.Toxicol.Chem. 8(9):817-823,[O-][N+](=O)C1=C(Cl)C=C(Cl)C=C1Cl
18708-70-8,WB,28,Oncorhynchus mykiss,FT,Cb/Cw,2.902546779,LogBCF (L/kg bdwt),FW,ArnotGobas,Octanol/Water Partition Coefficients a Bioconcentration Factors of Chloronitrobenzenes in Rainbow Trout (Salmo gairdneri),"Niimi, A.J., H.B. Lee, a G.P. Kissoon",1989,Environ.Toxicol.Chem. 8(9):817-823,[O-][N+](=O)C1=C(Cl)C=C(Cl)C=C1Cl
18708-70-8,WB,12,Oncorhynchus mykiss,FT,Cb/Cw,2.846337112,LogBCF (L/kg bdwt),FW,ArnotGobas,Octanol/Water Partition Coefficients a Bioconcentration Factors of Chloronitrobenzenes in Rainbow Trout (Salmo gairdneri),"Niimi, A.J., H.B. Lee, a G.P. Kissoon",1989,Environ.Toxicol.Chem. 8(9):817-823,[O-][N+](=O)C1=C(Cl)C=C(Cl)C=C1Cl
18708-70-8,WB,20,Oncorhynchus mykiss,FT,Cb/Cw,2.677606953,LogBCF (L/kg bdwt),FW,ArnotGobas,Octanol/Water Partition Coefficients a Bioconcentration Factors of Chloronitrobenzenes in Rainbow Trout (Salmo gairdneri),"Niimi, A.J., H.B. Lee, a G.P. Kissoon",1989,Environ.Toxicol.Chem. 8(9):817-823,[O-][N+](=O)C1=C(Cl)C=C(Cl)C=C1Cl
18854-01-8,WB,1,Cyprinus carpio,FT,Cb/Cw,2.86332286,LogBCF (L/kg bdwt),FW,ArnotGobas,Accumulation a Excretion of Pesticides Used in Golf-Courses by Carp (Cyprinus carpio) a Willow Shiner (Gnathopogon caerulescens).,"Tsuda, T., S. Aoki, M. Kojima, a T. Fujita",1992,Comp.Biochem.Physiol.C 101(1):63-66,CCOP(=S)(OCC)OC1=NOC(=C1)C1=CC=CC=C1
18854-01-8,WB,10,Cyprinus carpio,FT,Cb/Cw,2.69019608,LogBCF (L/kg bdwt),FW,ArnotGobas,Accumulation a Excretion of Pesticides Used in Golf-Courses by Carp (Cyprinus carpio) a Willow Shiner (Gnathopogon caerulescens).,"Tsuda, T., S. Aoki, M. Kojima, a T. Fujita",1992,Comp.Biochem.Physiol.C 101(1):63-66,CCOP(=S)(OCC)OC1=NOC(=C1)C1=CC=CC=C1
18854-01-8,WB,3,Cyprinus carpio,FT,Cb/Cw,2.653212514,LogBCF (L/kg bdwt),FW,ArnotGobas,Accumulation a Excretion of Pesticides Used in Golf-Courses by Carp (Cyprinus carpio) a Willow Shiner (Gnathopogon caerulescens).,"Tsuda, T., S. Aoki, M. Kojima, a T. Fujita",1992,Comp.Biochem.Physiol.C 101(1):63-66,CCOP(=S)(OCC)OC1=NOC(=C1)C1=CC=CC=C1
18854-01-8,WB,7,Cyprinus carpio,FT,Cb/Cw,2.531478917,LogBCF (L/kg bdwt),FW,ArnotGobas,Accumulation a Excretion of Pesticides Used in Golf-Courses by Carp (Cyprinus carpio) a Willow Shiner (Gnathopogon caerulescens).,"Tsuda, T., S. Aoki, M. Kojima, a T. Fujita",1992,Comp.Biochem.Physiol.C 101(1):63-66,CCOP(=S)(OCC)OC1=NOC(=C1)C1=CC=CC=C1
18854-01-8,WB,14,Cyprinus carpio,FT,Cb/Cw,2.301029996,LogBCF (L/kg bdwt),FW,ArnotGobas,Accumulation a Excretion of Pesticides Used in Golf-Courses by Carp (Cyprinus carpio) a Willow Shiner (Gnathopogon caerulescens).,"Tsuda, T., S. Aoki, M. Kojima, a T. Fujita",1992,Comp.Biochem.Physiol.C 101(1):63-66,CCOP(=S)(OCC)OC1=NOC(=C1)C1=CC=CC=C1
1897-45-6,WB,14,Cyprinus carpio,FT,Cb/Cw,1.113943352,LogBCF (L/kg bdwt),FW,ArnotGobas,Accumulation a Excretion of Pesticides Used in Golf-Courses by Carp (Cyprinus carpio) a Willow Shiner (Gnathopogon caerulescens).,"Tsuda, T., S. Aoki, M. Kojima, a T. Fujita",1992,Comp.Biochem.Physiol.C 101(1):63-66,ClC1=C(Cl)C(C#N)=C(Cl)C(C#N)=C1Cl
1897-45-6,WB,42,Cyprinus carpio,FT,Cb/Cw,1.803391525,LogBCF (L/kg bdwt),FW,ArnotGobas,Biodegradation a Bioconcentration of Existing Chemical Substances uer the Chemical Substances Control Law,Chemicals Evaluation a Research Institute,1992,http://qsar.cerij.or.jp/cgi-bin/DEGACC/iex.cgie,ClC1=C(Cl)C(C#N)=C(Cl)C(C#N)=C1Cl
1897-45-6,WB,42,Cyprinus carpio,FT,Cb/Cw,0.144813051,LogBCF (L/kg bdwt),FW,ArnotGobas,Biodegradation a Bioconcentration of Existing Chemical Substances uer the Chemical Substances Control Law,Chemicals Evaluation a Research Institute,1992,http://qsar.cerij.or.jp/cgi-bin/DEGACC/iex.cgie,ClC1=C(Cl)C(C#N)=C(Cl)C(C#N)=C1Cl
1897-45-6,WB,7,Cyprinus carpio,FT,Cb/Cw,1.612783857,LogBCF (L/kg bdwt),FW,ArnotGobas,Accumulation a Excretion of Pesticides Used in Golf-Courses by Carp (Cyprinus carpio) a Willow Shiner (Gnathopogon caerulescens).,"Tsuda, T., S. Aoki, M. Kojima, a T. Fujita",1992,Comp.Biochem.Physiol.C 101(1):63-66,ClC1=C(Cl)C(C#N)=C(Cl)C(C#N)=C1Cl
1897-45-6,WB,3,Cyprinus carpio,FT,Cb/Cw,1.477121255,LogBCF (L/kg bdwt),FW,ArnotGobas,Accumulation a Excretion of Pesticides Used in Golf-Courses by Carp (Cyprinus carpio) a Willow Shiner (Gnathopogon caerulescens).,"Tsuda, T., S. Aoki, M. Kojima, a T. Fujita",1992,Comp.Biochem.Physiol.C 101(1):63-66,ClC1=C(Cl)C(C#N)=C(Cl)C(C#N)=C1Cl
1897-45-6,WB,1,Cyprinus carpio,FT,Cb/Cw,1.431363764,LogBCF (L/kg bdwt),FW,ArnotGobas,Accumulation a Excretion of Pesticides Used in Golf-Courses by Carp (Cyprinus carpio) a Willow Shiner (Gnathopogon caerulescens).,"Tsuda, T., S. Aoki, M. Kojima, a T. Fujita",1992,Comp.Biochem.Physiol.C 101(1):63-66,ClC1=C(Cl)C(C#N)=C(Cl)C(C#N)=C1Cl
1897-45-6,WB,10,Cyprinus carpio,FT,Cb/Cw,1.146128036,LogBCF (L/kg bdwt),FW,ArnotGobas,Accumulation a Excretion of Pesticides Used in Golf-Courses by Carp (Cyprinus carpio) a Willow Shiner (Gnathopogon caerulescens).,"Tsuda, T., S. Aoki, M. Kojima, a T. Fujita",1992,Comp.Biochem.Physiol.C 101(1):63-66,ClC1=C(Cl)C(C#N)=C(Cl)C(C#N)=C1Cl
1897-45-6,WB,1,Gnathopogon caerulescens,FT,Cb/Cw,1.380211242,LogBCF (L/kg bdwt),FW,ArnotGobas,Accumulation a Excretion of Pesticides Used in Golf-Courses by Carp (Cyprinus carpio) a Willow Shiner (Gnathopogon caerulescens).,"Tsuda, T., S. Aoki, M. Kojima, a T. Fujita",1992,Comp.Biochem.Physiol.C 101(1):63-66,ClC1=C(Cl)C(C#N)=C(Cl)C(C#N)=C1Cl
1897-45-6,WB,3,Gnathopogon caerulescens,FT,Cb/Cw,1.301029996,LogBCF (L/kg bdwt),FW,ArnotGobas,Accumulation a Excretion of Pesticides Used in Golf-Courses by Carp (Cyprinus carpio) a Willow Shiner (Gnathopogon caerulescens).,"Tsuda, T., S. Aoki, M. Kojima, a T. Fujita",1992,Comp.Biochem.Physiol.C 101(1):63-66,ClC1=C(Cl)C(C#N)=C(Cl)C(C#N)=C1Cl
1897-45-6,WB,14,Gnathopogon caerulescens,FT,Cb/Cw,1.278753601,LogBCF (L/kg bdwt),FW,ArnotGobas,Accumulation a Excretion of Pesticides Used in Golf-Courses by Carp (Cyprinus carpio) a Willow Shiner (Gnathopogon caerulescens).,"Tsuda, T., S. Aoki, M. Kojima, a T. Fujita",1992,Comp.Biochem.Physiol.C 101(1):63-66,ClC1=C(Cl)C(C#N)=C(Cl)C(C#N)=C1Cl
1897-45-6,WB,10,Gnathopogon caerulescens,FT,Cb/Cw,1.146128036,LogBCF (L/kg bdwt),FW,ArnotGobas,Accumulation a Excretion of Pesticides Used in Golf-Courses by Carp (Cyprinus carpio) a Willow Shiner (Gnathopogon caerulescens).,"Tsuda, T., S. Aoki, M. Kojima, a T. Fujita",1992,Comp.Biochem.Physiol.C 101(1):63-66,ClC1=C(Cl)C(C#N)=C(Cl)C(C#N)=C1Cl
1897-45-6,WB,7,Gnathopogon caerulescens,FT,Cb/Cw,1.113943352,LogBCF (L/kg bdwt),FW,ArnotGobas,Accumulation a Excretion of Pesticides Used in Golf-Courses by Carp (Cyprinus carpio) a Willow Shiner (Gnathopogon caerulescens).,"Tsuda, T., S. Aoki, M. Kojima, a T. Fujita",1992,Comp.Biochem.Physiol.C 101(1):63-66,ClC1=C(Cl)C(C#N)=C(Cl)C(C#N)=C1Cl
1910-42-5,WB,42,Cyprinus carpio,FT,Cb/Cw,0.28,LogBCF (L/kg bdwt),,ArnotGobas,Biodegradation a Bioconcentration of Existing Chemical Substances uer the Chemical Substances Control Law,Chemicals Evaluation a Research Institute,1992,http://qsar.cerij.or.jp/cgi-bin/DEGACC/iex.cgie,C[N+]1=CC=C(C=C1)C1=CC=[N+](C)C=C1
1910-42-5,WB,42,Cyprinus carpio,FT,Cb/Cw,-0.600740523,LogBCF (L/kg bdwt),,ArnotGobas,Biodegradation a Bioconcentration of Existing Chemical Substances uer the Chemical Substances Control Law,Chemicals Evaluation a Research Institute,1992,http://qsar.cerij.or.jp/cgi-bin/DEGACC/iex.cgie,C[N+]1=CC=C(C=C1)C1=CC=[N+](C)C=C1
1912-24-9,WB,276,Pimephales promelas,,,0.9,LogBCF (L/kg bdwt),,ArnotGobas,Toxicity of Four Pesticides to Water Fleas a Fathead Minnows.,"Macek, K.J., M.A. Liberg, S. Sauter, K.S. Buxton, a P.A. Costa",1976,EPA-600/3-76-099,CCNC1=NC(Cl)=NC(NC(C)C)=N1
1912-24-9,WB,1,Coregonus fera,S,Cb/Cw,0.968482949,LogBCF (L/kg bdwt),FW,ArnotGobas,"Mechanisms of Bioaccumulation of a Herbicide (Atrazine, S-Triazine) in a Freshwater Mollusc (Ancylus fluviatilis Mull.) a a Fish (Coregonus fera)","Gunkel, G., a B. Streit",1980,Water Res. 14(11):1573-1584,CCNC1=NC(Cl)=NC(NC(C)C)=N1
1945-53-5,WB,14,Oncorhynchus mykiss,FT,Cb/Cw,1.397940009,LogBCF (L/kg bdwt),FW,ArnotGobas,Free a Conjugated Concentrations of Nine Resin Acids in Rainbow Trout (Oncorhynchus mykiss) Following Waterborne Exposure,"Niimi, A.J., a H.B. Lee",1992,Environ.Toxicol.Chem. 11(10):1403-1407,CC(C)C1=CC2=C(CC1)C1(C)CCCC(C)(C1CC2)C(O)=O
1945-53-5,WB,20,Oncorhynchus mykiss,FT,Cb/Cw,1.397940009,LogBCF (L/kg bdwt),FW,ArnotGobas,Free a Conjugated Concentrations of Nine Resin Acids in Rainbow Trout (Oncorhynchus mykiss) Following Waterborne Exposure,"Niimi, A.J., a H.B. Lee",1992,Environ.Toxicol.Chem. 11(10):1403-1407,CC(C)C1=CC2=C(CC1)C1(C)CCCC(C)(C1CC2)C(O)=O
195209-93-9,WB,0.5,Oryzias latipes,FT,Cb/Cw,-0.638272164,LogBCF (L/kg bdwt),FW,ArnotGobas,"Acute Toxicity, Accumulation a Excretion of Isoprothiolane a Its Degradation Products in Killifish","Tsuda, T., M. Kojima, H. Harada, A. Nakajima, a S. Aoki",1997,Water Res. 31(2):323-327,CC(C)OC(=O)C(Cl)C(=O)OC(C)C
195209-93-9,WB,3,Oryzias latipes,FT,Cb/Cw,-0.657577319,LogBCF (L/kg bdwt),FW,ArnotGobas,"Acute Toxicity, Accumulation a Excretion of Isoprothiolane a Its Degradation Products in Killifish","Tsuda, T., M. Kojima, H. Harada, A. Nakajima, a S. Aoki",1997,Water Res. 31(2):323-327,CC(C)OC(=O)C(Cl)C(=O)OC(C)C
195209-93-9,WB,5,Oryzias latipes,FT,Cb/Cw,-0.657577319,LogBCF (L/kg bdwt),FW,ArnotGobas,"Acute Toxicity, Accumulation a Excretion of Isoprothiolane a Its Degradation Products in Killifish","Tsuda, T., M. Kojima, H. Harada, A. Nakajima, a S. Aoki",1997,Water Res. 31(2):323-327,CC(C)OC(=O)C(Cl)C(=O)OC(C)C
195209-93-9,WB,1,Oryzias latipes,FT,Cb/Cw,-0.677780705,LogBCF (L/kg bdwt),FW,ArnotGobas,"Acute Toxicity, Accumulation a Excretion of Isoprothiolane a Its Degradation Products in Killifish","Tsuda, T., M. Kojima, H. Harada, A. Nakajima, a S. Aoki",1997,Water Res. 31(2):323-327,CC(C)OC(=O)C(Cl)C(=O)OC(C)C
195209-93-9,WB,2,Oryzias latipes,FT,Cb/Cw,-0.677780705,LogBCF (L/kg bdwt),FW,ArnotGobas,"Acute Toxicity, Accumulation a Excretion of Isoprothiolane a Its Degradation Products in Killifish","Tsuda, T., M. Kojima, H. Harada, A. Nakajima, a S. Aoki",1997,Water Res. 31(2):323-327,CC(C)OC(=O)C(Cl)C(=O)OC(C)C
195209-93-9,WB,0.25,Oryzias latipes,FT,Cb/Cw,-0.698970004,LogBCF (L/kg bdwt),FW,ArnotGobas,"Acute Toxicity, Accumulation a Excretion of Isoprothiolane a Its Degradation Products in Killifish","Tsuda, T., M. Kojima, H. Harada, A. Nakajima, a S. Aoki",1997,Water Res. 31(2):323-327,CC(C)OC(=O)C(Cl)C(=O)OC(C)C
195209-93-9,WB,7.01,Oryzias latipes,FT,Cb/Cw,-0.744727495,LogBCF (L/kg bdwt),FW,ArnotGobas,"Acute Toxicity, Accumulation a Excretion of Isoprothiolane a Its Degradation Products in Killifish","Tsuda, T., M. Kojima, H. Harada, A. Nakajima, a S. Aoki",1997,Water Res. 31(2):323-327,CC(C)OC(=O)C(Cl)C(=O)OC(C)C
19666-30-9,WB,56,Cyprinus carpio,FT,Cb/Cw,1.405719161,LogBCF (L/kg bdwt),,ArnotGobas,Biodegradation a Bioconcentration of Existing Chemical Substances uer the Chemical Substances Control Law,Chemicals Evaluation a Research Institute,1992,http://qsar.cerij.or.jp/cgi-bin/DEGACC/iex.cgie,CC(C)OC1=CC(N2N=C(OC2=O)C(C)(C)C)=C(Cl)C=C1Cl
19666-30-9,WB,56,Cyprinus carpio,FT,Cb/Cw,0.426408809,LogBCF (L/kg bdwt),,ArnotGobas,Biodegradation a Bioconcentration of Existing Chemical Substances uer the Chemical Substances Control Law,Chemicals Evaluation a Research Institute,1992,http://qsar.cerij.or.jp/cgi-bin/DEGACC/iex.cgie,CC(C)OC1=CC(N2N=C(OC2=O)C(C)(C)C)=C(Cl)C=C1Cl
19666-30-9,WB,10,Gnathopogon coerulescens,FT,Cb/Cw,3.1430148,LogBCF (L/kg bdwt),FW,ArnotGobas,"Accumulation a Excretion of Oxadiazon, CNP, a Chlomethoxynil by Willow Shiner","Tsuda, T.S.A., M. Kojima, a H. Harada",1990,Comp.Biochem.Physiol.C 96(2):373-375,CC(C)OC1=CC(N2N=C(OC2=O)C(C)(C)C)=C(Cl)C=C1Cl
19666-30-9,WB,7,Gnathopogon coerulescens,FT,Cb/Cw,3.130655349,LogBCF (L/kg bdwt),FW,ArnotGobas,"Accumulation a Excretion of Oxadiazon, CNP, a Chlomethoxynil by Willow Shiner","Tsuda, T.S.A., M. Kojima, a H. Harada",1990,Comp.Biochem.Physiol.C 96(2):373-375,CC(C)OC1=CC(N2N=C(OC2=O)C(C)(C)C)=C(Cl)C=C1Cl
19666-30-9,WB,14,Gnathopogon coerulescens,FT,Cb/Cw,2.972202838,LogBCF (L/kg bdwt),FW,ArnotGobas,"Accumulation a Excretion of Oxadiazon, CNP, a Chlomethoxynil by Willow Shiner","Tsuda, T.S.A., M. Kojima, a H. Harada",1990,Comp.Biochem.Physiol.C 96(2):373-375,CC(C)OC1=CC(N2N=C(OC2=O)C(C)(C)C)=C(Cl)C=C1Cl
20020-02-4,WB,75,Oncorhynchus mykiss,FT,Cb/Cw,3.698970004,LogBCF (L/kg bdwt),FW,ArnotGobas,Bioconcentration Factors of Some Halogenated Organics for Rainbow Trout: Limitations in Their Use for Prediction of Environmental Residues,"Oliver, B.G., a A.J. Niimi",1985,Environ.Sci.Technol. 19(9):842-849,ClC1=C(Cl)C(Cl)=C2C=CC=CC2=C1Cl
20020-02-4,WB,50,Oncorhynchus mykiss,FT,Cb/Cw,3.72427587,LogBCF (L/kg bdwt),FW,ArnotGobas,Bioconcentration Factors of Some Halogenated Organics for Rainbow Trout: Limitations in Their Use for Prediction of Environmental Residues,"Oliver, B.G., a A.J. Niimi",1985,Environ.Sci.Technol. 19(9):842-849,ClC1=C(Cl)C(Cl)=C2C=CC=CC2=C1Cl
20020-02-4,WB,96,Oncorhynchus mykiss,FT,Cb/Cw,3.662757832,LogBCF (L/kg bdwt),FW,ArnotGobas,Bioconcentration Factors of Some Halogenated Organics for Rainbow Trout: Limitations in Their Use for Prediction of Environmental Residues,"Oliver, B.G., a A.J. Niimi",1985,Environ.Sci.Technol. 19(9):842-849,ClC1=C(Cl)C(Cl)=C2C=CC=CC2=C1Cl
20020-02-4,WB,35,Oncorhynchus mykiss,FT,Cb/Cw,3.72427587,LogBCF (L/kg bdwt),FW,ArnotGobas,Bioconcentration Factors of Some Halogenated Organics for Rainbow Trout: Limitations in Their Use for Prediction of Environmental Residues,"Oliver, B.G., a A.J. Niimi",1985,Environ.Sci.Technol. 19(9):842-849,ClC1=C(Cl)C(Cl)=C2C=CC=CC2=C1Cl
20076-86-2,WB,7.01,Poecilia reticulata,FT,Cb/Cw,1.894360376,LogBCF (L/kg bdwt),FW,ArnotGobas,Uptake a Elimination Kinetics of Organophosphorous Pesticides in the Guppy (Poecilia reticulata): Correlations with the Octanol/Water Partition,"De Bruijn, J., a J. Hermens",1991,Environ.Toxicol.Chem. 10(6):791-804,CC1=C(C(O)=O)C(O)=C(C(=O)S1)C1=CC=CC=C1
2012-00-2,,2,Oryzias latipes,FT,Cb/Cw,0.792391689,LogBCF (L/kg bdwt),FW,ArnotGobas,"Acute Toxicity, Accumulation a Excretion of Organophosphorous Insecticides a Their Oxidation Products in Killifish","Tsuda, T., M. Kojima, H. Harada, A. Nakajima, a S. Aoki",1997,Chemosphere 35(5):939-949,CCOP(=O)(OC1=CC=C(C=C1)[N+]([O-])=O)C1=CC=CC=C1
2012-00-2,,3,Oryzias latipes,FT,Cb/Cw,0.62324929,LogBCF (L/kg bdwt),FW,ArnotGobas,"Acute Toxicity, Accumulation a Excretion of Organophosphorous Insecticides a Their Oxidation Products in Killifish","Tsuda, T., M. Kojima, H. Harada, A. Nakajima, a S. Aoki",1997,Chemosphere 35(5):939-949,CCOP(=O)(OC1=CC=C(C=C1)[N+]([O-])=O)C1=CC=CC=C1
2012-00-2,,5,Oryzias latipes,FT,Cb/Cw,1.041392685,LogBCF (L/kg bdwt),FW,ArnotGobas,"Acute Toxicity, Accumulation a Excretion of Organophosphorous Insecticides a Their Oxidation Products in Killifish","Tsuda, T., M. Kojima, H. Harada, A. Nakajima, a S. Aoki",1997,Chemosphere 35(5):939-949,CCOP(=O)(OC1=CC=C(C=C1)[N+]([O-])=O)C1=CC=CC=C1
2012-00-2,,7.01,Oryzias latipes,FT,Cb/Cw,1,LogBCF (L/kg bdwt),FW,ArnotGobas,"Acute Toxicity, Accumulation a Excretion of Organophosphorous Insecticides a Their Oxidation Products in Killifish","Tsuda, T., M. Kojima, H. Harada, A. Nakajima, a S. Aoki",1997,Chemosphere 35(5):939-949,CCOP(=O)(OC1=CC=C(C=C1)[N+]([O-])=O)C1=CC=CC=C1
2012-00-2,WB,0.25,Oryzias latipes,FT,Cb/Cw,0.431363764,LogBCF (L/kg bdwt),FW,ArnotGobas,"Acute Toxicity, Accumulation a Excretion of Organophosphorous Insecticides a Their Oxidation Products in Killifish","Tsuda, T., M. Kojima, H. Harada, A. Nakajima, a S. Aoki",1997,Chemosphere 35(5):939-949,CCOP(=O)(OC1=CC=C(C=C1)[N+]([O-])=O)C1=CC=CC=C1
2012-00-2,WB,0.5,Oryzias latipes,FT,Cb/Cw,0.62324929,LogBCF (L/kg bdwt),FW,ArnotGobas,"Acute Toxicity, Accumulation a Excretion of Organophosphorous Insecticides a Their Oxidation Products in Killifish","Tsuda, T., M. Kojima, H. Harada, A. Nakajima, a S. Aoki",1997,Chemosphere 35(5):939-949,CCOP(=O)(OC1=CC=C(C=C1)[N+]([O-])=O)C1=CC=CC=C1
2012-00-2,WB,1,Oryzias latipes,FT,Cb/Cw,0.792391689,LogBCF (L/kg bdwt),FW,ArnotGobas,"Acute Toxicity, Accumulation a Excretion of Organophosphorous Insecticides a Their Oxidation Products in Killifish","Tsuda, T., M. Kojima, H. Harada, A. Nakajima, a S. Aoki",1997,Chemosphere 35(5):939-949,CCOP(=O)(OC1=CC=C(C=C1)[N+]([O-])=O)C1=CC=CC=C1
2027-17-0,WB,21,Scophthalmus maximus,FT,K1/K2,2.895974732,LogBCF (L/kg bdwt),SW,ArnotGobas,Bioaccumulation of polycyclic aromatic compous: 2. Modeling bioaccumulation in marine organisms chronically exposed to dispersed oil,"Baussant, T., Sanni, S., Skadshlim, A., Jonsson, G., Borseth, J.F. a Gaudebert, B.",2001,Environmental Toxicology a Chemistry 20(6):1185-1198,CC(C)C1=CC=C2C=CC=CC2=C1
2027-17-0,WB,36,Cyprinodon variegatus,FT,K1/K2,4.667789051,LogBCF (L/kg bdwt),SW,ArnotGobas,"Bioconcentration, biotransformation, a elimination of polycyclic aromatic hydrocarbons in sheepshead minnows (cyprinodon variegatus) exposed to contaminated seawater","Jonsson, G., Bechmann, R.K., Bamber, S.D. a Baussant, T.",2004,Environmental Toxicology a Chemistry 23(6):1538-1548,CC(C)C1=CC=C2C=CC=CC2=C1
2027-17-0,WB,36,Cyprinodon variegatus,FT,K1/K2,4.377652237,LogBCF (L/kg bdwt),SW,ArnotGobas,"Bioconcentration, biotransformation, a elimination of polycyclic aromatic hydrocarbons in sheepshead minnows (cyprinodon variegatus) exposed to contaminated seawater","Jonsson, G., Bechmann, R.K., Bamber, S.D. a Baussant, T.",2004,Environmental Toxicology a Chemistry 23(6):1538-1548,CC(C)C1=CC=C2C=CC=CC2=C1
2027-17-0,WB,36,Cyprinodon variegatus,FT,Cb/Cw,4.127752516,LogBCF (L/kg bdwt),SW,ArnotGobas,"Bioconcentration, biotransformation, a elimination of polycyclic aromatic hydrocarbons in sheepshead minnows (cyprinodon variegatus) exposed to contaminated seawater","Jonsson, G., Bechmann, R.K., Bamber, S.D. a Baussant, T.",2004,Environmental Toxicology a Chemistry 23(6):1538-1548,CC(C)C1=CC=C2C=CC=CC2=C1
2027-17-0,WB,36,Cyprinodon variegatus,FT,Cb/Cw,4.093596769,LogBCF (L/kg bdwt),SW,ArnotGobas,"Bioconcentration, biotransformation, a elimination of polycyclic aromatic hydrocarbons in sheepshead minnows (cyprinodon variegatus) exposed to contaminated seawater","Jonsson, G., Bechmann, R.K., Bamber, S.D. a Baussant, T.",2004,Environmental Toxicology a Chemistry 23(6):1538-1548,CC(C)C1=CC=C2C=CC=CC2=C1
2042-14-0,WB,42,Cyprinus carpio,FT,Cb/Cw,1.006280421,LogBCF (L/kg bdwt),,ArnotGobas,Biodegradation a Bioconcentration of Existing Chemical Substances uer the Chemical Substances Control Law,Chemicals Evaluation a Research Institute,1992,http://qsar.cerij.or.jp/cgi-bin/DEGACC/iex.cgie,CC1=CC=C(O)C=C1[N+]([O-])=O
2042-14-0,WB,42,Cyprinus carpio,FT,Cb/Cw,0.903190842,LogBCF (L/kg bdwt),,ArnotGobas,Biodegradation a Bioconcentration of Existing Chemical Substances uer the Chemical Substances Control Law,Chemicals Evaluation a Research Institute,1992,http://qsar.cerij.or.jp/cgi-bin/DEGACC/iex.cgie,CC1=CC=C(O)C=C1[N+]([O-])=O
2050-76-2,WB,42,Cyprinus carpio,FT,Cb/Cw,1.349344465,LogBCF (L/kg bdwt),,ArnotGobas,Biodegradation a Bioconcentration of Existing Chemical Substances uer the Chemical Substances Control Law,Chemicals Evaluation a Research Institute,1992,http://qsar.cerij.or.jp/cgi-bin/DEGACC/iex.cgie,OC1=C(Cl)C=C(Cl)C2=CC=CC=C12
2050-76-2,WB,42,Cyprinus carpio,FT,Cb/Cw,0.414955255,LogBCF (L/kg bdwt),,ArnotGobas,Biodegradation a Bioconcentration of Existing Chemical Substances uer the Chemical Substances Control Law,Chemicals Evaluation a Research Institute,1992,http://qsar.cerij.or.jp/cgi-bin/DEGACC/iex.cgie,OC1=C(Cl)C=C(Cl)C2=CC=CC=C12
2051-24-3,WB,12,Poecilia reticulata,FT,K1/K2,3.922913357,LogBCF (L/kg bdwt),FW,ArnotGobas,Bioconcentration of Polybrominated Benzenes a Biphenyls a Related Superhydrophobic Chemicals in Fish: Role of Bioavailability a Elimination into the Feces.,"Gobas, F.A.P.C., K.E. Clark, W.Y. Shiu a D. Mackay",1989,Environ. Toxicol. Chem 8:231-245,ClC1=C(Cl)C(Cl)=C(C(Cl)=C1Cl)C1=C(Cl)C(Cl)=C(Cl)C(Cl)=C1Cl
2051-24-3,WB,30,Danio rerio,FT,K1/K2,5.44,LogBCF (L/kg bdwt),FW,ArnotGobas,Kinetics of Bioconcentration a Clearance of 28 Polychlorinated Biphenyl Congeners in Zebrafish (Brachydanio rerio),"Fox, K., G.P. Zauke, a W. Butte",1994,Ecotoxicol.Environ.Saf. 28(1):99-109,ClC1=C(Cl)C(Cl)=C(C(Cl)=C1Cl)C1=C(Cl)C(Cl)=C(Cl)C(Cl)=C1Cl
208-96-8,WB,56,Cyprinus carpio,FT,Cb/Cw,2.587381465,LogBCF (L/kg bdwt),,ArnotGobas,Biodegradation a Bioconcentration of Existing Chemical Substances uer the Chemical Substances Control Law,Chemicals Evaluation a Research Institute,1992,http://qsar.cerij.or.jp/cgi-bin/DEGACC/iex.cgie,C1=CC2=C3C1=CC=CC3=CC=C2
208-96-8,WB,56,Cyprinus carpio,FT,Cb/Cw,2.565617697,LogBCF (L/kg bdwt),,ArnotGobas,Biodegradation a Bioconcentration of Existing Chemical Substances uer the Chemical Substances Control Law,Chemicals Evaluation a Research Institute,1992,http://qsar.cerij.or.jp/cgi-bin/DEGACC/iex.cgie,C1=CC2=C3C1=CC=CC3=CC=C2
2104-64-5,WB,56,Cyprinus carpio,FT,Cb/Cw,3.05095946,LogBCF (L/kg bdwt),,ArnotGobas,Biodegradation a Bioconcentration of Existing Chemical Substances uer the Chemical Substances Control Law,Chemicals Evaluation a Research Institute,1992,http://qsar.cerij.or.jp/cgi-bin/DEGACC/iex.cgie,CCOP(=S)(OC1=CC=C(C=C1)[N+]([O-])=O)C1=CC=CC=C1
2104-64-5,WB,56,Cyprinus carpio,FT,Cb/Cw,2.972665592,LogBCF (L/kg bdwt),,ArnotGobas,Biodegradation a Bioconcentration of Existing Chemical Substances uer the Chemical Substances Control Law,Chemicals Evaluation a Research Institute,1992,http://qsar.cerij.or.jp/cgi-bin/DEGACC/iex.cgie,CCOP(=S)(OC1=CC=C(C=C1)[N+]([O-])=O)C1=CC=CC=C1
2104-64-5,WB,14,Pseudorasbora parva,FT,Cb/Cw,3.370328008,LogBCF (L/kg bdwt),FW,ArnotGobas,Measurement of the Bioconcentration Factors of Pesticides by Freshwater Fish a Their Correlation with Physicochemical Properties or Acute Toxicities,"Kanazawa, J.",1981,Pestic.Sci. 12(4):417-424,CCOP(=S)(OC1=CC=C(C=C1)[N+]([O-])=O)C1=CC=CC=C1
2104-64-5,WB,5,Oryzias latipes,FT,Cb/Cw,3.13225969,LogBCF (L/kg bdwt),FW,ArnotGobas,Relationships of Bioconcentration Factors of Organophosphate Pesticides Among Species of Fish,"Tsuda, T., M. Kojima, H. Harada, A. Nakajima, a S. Aoki",1997,Comp.Biochem.Physiol.C 116(3):213-218,CCOP(=S)(OC1=CC=C(C=C1)[N+]([O-])=O)C1=CC=CC=C1
2104-64-5,WB,7.01,Oryzias latipes,FT,Cb/Cw,3.022840611,LogBCF (L/kg bdwt),FW,ArnotGobas,Relationships of Bioconcentration Factors of Organophosphate Pesticides Among Species of Fish,"Tsuda, T., M. Kojima, H. Harada, A. Nakajima, a S. Aoki",1997,Comp.Biochem.Physiol.C 116(3):213-218,CCOP(=S)(OC1=CC=C(C=C1)[N+]([O-])=O)C1=CC=CC=C1
2104-64-5,WB,7.01,Poecilia reticulata,FT,Cb/Cw,3.047664195,LogBCF (L/kg bdwt),FW,ArnotGobas,Relationships of Bioconcentration Factors of Organophosphate Pesticides Among Species of Fish,"Tsuda, T., M. Kojima, H. Harada, A. Nakajima, a S. Aoki",1997,Comp.Biochem.Physiol.C 116(3):213-218,CCOP(=S)(OC1=CC=C(C=C1)[N+]([O-])=O)C1=CC=CC=C1
2104-64-5,WB,3,Carassius auratus,FT,Cb/Cw,2.895422546,LogBCF (L/kg bdwt),FW,ArnotGobas,Relationships of Bioconcentration Factors of Organophosphate Pesticides Among Species of Fish,"Tsuda, T., M. Kojima, H. Harada, A. Nakajima, a S. Aoki",1997,Comp.Biochem.Physiol.C 116(3):213-218,CCOP(=S)(OC1=CC=C(C=C1)[N+]([O-])=O)C1=CC=CC=C1
2104-64-5,WB,3,Oryzias latipes,FT,Cb/Cw,2.961895474,LogBCF (L/kg bdwt),FW,ArnotGobas,Relationships of Bioconcentration Factors of Organophosphate Pesticides Among Species of Fish,"Tsuda, T., M. Kojima, H. Harada, A. Nakajima, a S. Aoki",1997,Comp.Biochem.Physiol.C 116(3):213-218,CCOP(=S)(OC1=CC=C(C=C1)[N+]([O-])=O)C1=CC=CC=C1
2104-64-5,,5,Oryzias latipes,FT,Cb/Cw,3.089905111,LogBCF (L/kg bdwt),FW,ArnotGobas,"Acute Toxicity, Accumulation a Excretion of Organophosphorous Insecticides a Their Oxidation Products in Killifish","Tsuda, T., M. Kojima, H. Harada, A. Nakajima, a S. Aoki",1997,Chemosphere 35(5):939-949,CCOP(=S)(OC1=CC=C(C=C1)[N+]([O-])=O)C1=CC=CC=C1
2104-64-5,WB,5,Carassius auratus,FT,Cb/Cw,2.826074803,LogBCF (L/kg bdwt),FW,ArnotGobas,Relationships of Bioconcentration Factors of Organophosphate Pesticides Among Species of Fish,"Tsuda, T., M. Kojima, H. Harada, A. Nakajima, a S. Aoki",1997,Comp.Biochem.Physiol.C 116(3):213-218,CCOP(=S)(OC1=CC=C(C=C1)[N+]([O-])=O)C1=CC=CC=C1
2104-64-5,WB,7.01,Poecilia reticulata,FT,Cb/Cw,2.968015714,LogBCF (L/kg bdwt),FW,ArnotGobas,Relationships of Bioconcentration Factors of Organophosphate Pesticides Among Species of Fish,"Tsuda, T., M. Kojima, H. Harada, A. Nakajima, a S. Aoki",1997,Comp.Biochem.Physiol.C 116(3):213-218,CCOP(=S)(OC1=CC=C(C=C1)[N+]([O-])=O)C1=CC=CC=C1
2104-64-5,,7.01,Oryzias latipes,FT,Cb/Cw,3.007747778,LogBCF (L/kg bdwt),FW,ArnotGobas,"Acute Toxicity, Accumulation a Excretion of Organophosphorous Insecticides a Their Oxidation Products in Killifish","Tsuda, T., M. Kojima, H. Harada, A. Nakajima, a S. Aoki",1997,Chemosphere 35(5):939-949,CCOP(=S)(OC1=CC=C(C=C1)[N+]([O-])=O)C1=CC=CC=C1
2104-64-5,,2,Oryzias latipes,FT,Cb/Cw,2.914871818,LogBCF (L/kg bdwt),FW,ArnotGobas,"Acute Toxicity, Accumulation a Excretion of Organophosphorous Insecticides a Their Oxidation Products in Killifish","Tsuda, T., M. Kojima, H. Harada, A. Nakajima, a S. Aoki",1997,Chemosphere 35(5):939-949,CCOP(=S)(OC1=CC=C(C=C1)[N+]([O-])=O)C1=CC=CC=C1
2104-64-5,WB,7.01,Carassius auratus,FT,Cb/Cw,2.670245853,LogBCF (L/kg bdwt),FW,ArnotGobas,Relationships of Bioconcentration Factors of Organophosphate Pesticides Among Species of Fish,"Tsuda, T., M. Kojima, H. Harada, A. Nakajima, a S. Aoki",1997,Comp.Biochem.Physiol.C 116(3):213-218,CCOP(=S)(OC1=CC=C(C=C1)[N+]([O-])=O)C1=CC=CC=C1
2104-64-5,,3,Oryzias latipes,FT,Cb/Cw,2.881954971,LogBCF (L/kg bdwt),FW,ArnotGobas,"Acute Toxicity, Accumulation a Excretion of Organophosphorous Insecticides a Their Oxidation Products in Killifish","Tsuda, T., M. Kojima, H. Harada, A. Nakajima, a S. Aoki",1997,Chemosphere 35(5):939-949,CCOP(=S)(OC1=CC=C(C=C1)[N+]([O-])=O)C1=CC=CC=C1
2104-64-5,WB,3,Tanichthys albonubes,FT,Cb/Cw,2.530199698,LogBCF (L/kg bdwt),FW,ArnotGobas,Relationships of Bioconcentration Factors of Organophosphate Pesticides Among Species of Fish,"Tsuda, T., M. Kojima, H. Harada, A. Nakajima, a S. Aoki",1997,Comp.Biochem.Physiol.C 116(3):213-218,CCOP(=S)(OC1=CC=C(C=C1)[N+]([O-])=O)C1=CC=CC=C1
2104-64-5,WB,7.01,Cyprinus carpio,FT,Cb/Cw,1.929418926,LogBCF (L/kg bdwt),FW,ArnotGobas,Accumulation a Excretion of Organophosphorous Pesticides by Carp Cyprinus carpio,"Tsuda, T., S. Aoki, M. Kojima, a T. Fujita",1993,Comp.Biochem.Physiol.C 104(2):275-278,CCOP(=S)(OC1=CC=C(C=C1)[N+]([O-])=O)C1=CC=CC=C1
2104-64-5,WB,5,Cyprinus carpio,FT,Cb/Cw,1.69019608,LogBCF (L/kg bdwt),FW,ArnotGobas,Accumulation a Excretion of Organophosphorous Pesticides by Carp Cyprinus carpio,"Tsuda, T., S. Aoki, M. Kojima, a T. Fujita",1993,Comp.Biochem.Physiol.C 104(2):275-278,CCOP(=S)(OC1=CC=C(C=C1)[N+]([O-])=O)C1=CC=CC=C1
2104-64-5,WB,1,Cyprinus carpio,FT,Cb/Cw,1.477121255,LogBCF (L/kg bdwt),FW,ArnotGobas,Accumulation a Excretion of Organophosphorous Pesticides by Carp Cyprinus carpio,"Tsuda, T., S. Aoki, M. Kojima, a T. Fujita",1993,Comp.Biochem.Physiol.C 104(2):275-278,CCOP(=S)(OC1=CC=C(C=C1)[N+]([O-])=O)C1=CC=CC=C1
2104-64-5,WB,3,Cyprinus carpio,FT,Cb/Cw,1.462397998,LogBCF (L/kg bdwt),FW,ArnotGobas,Accumulation a Excretion of Organophosphorous Pesticides by Carp Cyprinus carpio,"Tsuda, T., S. Aoki, M. Kojima, a T. Fujita",1993,Comp.Biochem.Physiol.C 104(2):275-278,CCOP(=S)(OC1=CC=C(C=C1)[N+]([O-])=O)C1=CC=CC=C1
2104-64-5,WB,2.5,Oryzias latipes,FT,Cb/Cw,2.694605199,LogBCF (L/kg bdwt),FW,ArnotGobas,"Accumulation of IBP, Parathion a EPN by Killifish: Comparison of Iividual a Mixed Pesticides","Tsuda, T., S. Aoki, T. Inoue, a M. Kojima",1995,Comp.Biochem.Physiol.C 111(1):19-22,CCOP(=S)(OC1=CC=C(C=C1)[N+]([O-])=O)C1=CC=CC=C1
2104-96-3,WB,7.01,Poecilia reticulata,FT,Cb/Cw,3.594498625,LogBCF (L/kg bdwt),FW,ArnotGobas,Uptake a Elimination Kinetics of Organophosphorous Pesticides in the Guppy (Poecilia reticulata): Correlations with the Octanol/Water Partition,"De Bruijn, J., a J. Hermens",1991,Environ.Toxicol.Chem. 10(6):791-804,COP(=S)(OC)OC1=CC(Cl)=C(Br)C=C1Cl
2136-99-4,WB,30,Danio rerio,FT,K1/K2,5.82,LogBCF (L/kg bdwt),FW,ArnotGobas,Kinetics of Bioconcentration a Clearance of 28 Polychlorinated Biphenyl Congeners in Zebrafish (Brachydanio rerio),"Fox, K., G.P. Zauke, a W. Butte",1994,Ecotoxicol.Environ.Saf. 28(1):99-109,ClC1=CC(Cl)=C(Cl)C(=C1Cl)C1=C(Cl)C(Cl)=CC(Cl)=C1Cl
2212-67-1,WB,7.5,Pseudorasbora parva,FT,Cb/Cw,1.414973348,LogBCF (L/kg bdwt),FW,ArnotGobas,Measurement of the Bioconcentration Factors of Pesticides by Freshwater Fish a Their Correlation with Physicochemical Properties or Acute Toxicities,"Kanazawa, J.",1981,Pestic.Sci. 12(4):417-424,CCSC(=O)N1CCCCCC1
2216-69-5,WB,56,Cyprinus carpio,FT,Cb/Cw,2.285404867,LogBCF (L/kg bdwt),FW,ArnotGobas,Biodegradation a Bioconcentration of Existing Chemical Substances uer the Chemical Substances Control Law,Chemicals Evaluation a Research Institute,1992,http://qsar.cerij.or.jp/cgi-bin/DEGACC/iex.cgie,COC1=CC=CC2=CC=CC=C12
2216-69-5,WB,56,Cyprinus carpio,FT,Cb/Cw,2.2120918,LogBCF (L/kg bdwt),FW,ArnotGobas,Biodegradation a Bioconcentration of Existing Chemical Substances uer the Chemical Substances Control Law,Chemicals Evaluation a Research Institute,1992,http://qsar.cerij.or.jp/cgi-bin/DEGACC/iex.cgie,COC1=CC=CC2=CC=CC=C12
2234-13-1,WB,75,Oncorhynchus mykiss,FT,Cb/Cw,2.62324929,LogBCF (L/kg bdwt),FW,ArnotGobas,Bioconcentration Factors of Some Halogenated Organics for Rainbow Trout: Limitations in Their Use for Prediction of Environmental Residues,"Oliver, B.G., a A.J. Niimi",1985,Environ.Sci.Technol. 19(9):842-849,ClC1=C(Cl)C2=C(Cl)C(Cl)=C(Cl)C(Cl)=C2C(Cl)=C1Cl
2234-13-1,WB,96,Oncorhynchus mykiss,FT,Cb/Cw,2.531478917,LogBCF (L/kg bdwt),FW,ArnotGobas,Bioconcentration Factors of Some Halogenated Organics for Rainbow Trout: Limitations in Their Use for Prediction of Environmental Residues,"Oliver, B.G., a A.J. Niimi",1985,Environ.Sci.Technol. 19(9):842-849,ClC1=C(Cl)C2=C(Cl)C(Cl)=C(Cl)C(Cl)=C2C(Cl)=C1Cl
2243-62-1,WB,42,Cyprinus carpio,FT,Cb/Cw,0.65,LogBCF (L/kg bdwt),,ArnotGobas,Biodegradation a Bioconcentration of Existing Chemical Substances uer the Chemical Substances Control Law,Chemicals Evaluation a Research Institute,1992,http://qsar.cerij.or.jp/cgi-bin/DEGACC/iex.cgie,NC1=CC=CC2=C(N)C=CC=C12
2243-62-1,WB,42,Cyprinus carpio,FT,Cb/Cw,-0.01961743,LogBCF (L/kg bdwt),,ArnotGobas,Biodegradation a Bioconcentration of Existing Chemical Substances uer the Chemical Substances Control Law,Chemicals Evaluation a Research Institute,1992,http://qsar.cerij.or.jp/cgi-bin/DEGACC/iex.cgie,NC1=CC=CC2=C(N)C=CC=C12
2255-17-6,WB,7.01,Oryzias latipes,FT,Cb/Cw,0.462397998,LogBCF (L/kg bdwt),FW,ArnotGobas,"Acute Toxicity, Accumulation a Excretion of Organophosphorous Insecticides a Their Oxidation Products in Killifish","Tsuda, T., M. Kojima, H. Harada, A. Nakajima, a S. Aoki",1997,Chemosphere 35(5):939-949,COP(=O)(OC)OC1=CC=C(C(C)=C1)[N+]([O-])=O
2255-17-6,WB,5,Oryzias latipes,FT,Cb/Cw,0.414973348,LogBCF (L/kg bdwt),FW,ArnotGobas,"Acute Toxicity, Accumulation a Excretion of Organophosphorous Insecticides a Their Oxidation Products in Killifish","Tsuda, T., M. Kojima, H. Harada, A. Nakajima, a S. Aoki",1997,Chemosphere 35(5):939-949,COP(=O)(OC)OC1=CC=C(C(C)=C1)[N+]([O-])=O
2255-17-6,WB,2,Oryzias latipes,FT,Cb/Cw,0.322219295,LogBCF (L/kg bdwt),FW,ArnotGobas,"Acute Toxicity, Accumulation a Excretion of Organophosphorous Insecticides a Their Oxidation Products in Killifish","Tsuda, T., M. Kojima, H. Harada, A. Nakajima, a S. Aoki",1997,Chemosphere 35(5):939-949,COP(=O)(OC)OC1=CC=C(C(C)=C1)[N+]([O-])=O
2255-17-6,WB,1,Oryzias latipes,FT,Cb/Cw,0.176091259,LogBCF (L/kg bdwt),FW,ArnotGobas,"Acute Toxicity, Accumulation a Excretion of Organophosphorous Insecticides a Their Oxidation Products in Killifish","Tsuda, T., M. Kojima, H. Harada, A. Nakajima, a S. Aoki",1997,Chemosphere 35(5):939-949,COP(=O)(OC)OC1=CC=C(C(C)=C1)[N+]([O-])=O
2255-17-6,WB,3,Oryzias latipes,FT,Cb/Cw,0.176091259,LogBCF (L/kg bdwt),FW,ArnotGobas,"Acute Toxicity, Accumulation a Excretion of Organophosphorous Insecticides a Their Oxidation Products in Killifish","Tsuda, T., M. Kojima, H. Harada, A. Nakajima, a S. Aoki",1997,Chemosphere 35(5):939-949,COP(=O)(OC)OC1=CC=C(C(C)=C1)[N+]([O-])=O
2255-17-6,WB,0.25,Oryzias latipes,FT,Cb/Cw,0.079181246,LogBCF (L/kg bdwt),FW,ArnotGobas,"Acute Toxicity, Accumulation a Excretion of Organophosphorous Insecticides a Their Oxidation Products in Killifish","Tsuda, T., M. Kojima, H. Harada, A. Nakajima, a S. Aoki",1997,Chemosphere 35(5):939-949,COP(=O)(OC)OC1=CC=C(C(C)=C1)[N+]([O-])=O
2255-17-6,WB,0.5,Oryzias latipes,FT,Cb/Cw,0.079181246,LogBCF (L/kg bdwt),FW,ArnotGobas,"Acute Toxicity, Accumulation a Excretion of Organophosphorous Insecticides a Their Oxidation Products in Killifish","Tsuda, T., M. Kojima, H. Harada, A. Nakajima, a S. Aoki",1997,Chemosphere 35(5):939-949,COP(=O)(OC)OC1=CC=C(C(C)=C1)[N+]([O-])=O
226-36-8,WB,4,Pimephales promelas,S,K1/K2,2.029383778,LogBCF (L/kg bdwt),FW,ArnotGobas,Potential a Realized Bioconcentration. A Comparison of Observed a Predicted Bioconcentration of Azaarenes in the Fathead Minnow (Pimephales promelas),"Southworth, G.R., C.C. Keffer, a J.J. Beauchamp",1980,Environ.Sci.Technol. 14(12):1529-1531,C1=CC=C2C(C=CC3=NC4=C(C=CC5=CC=CC=C45)C=C23)=C1
2385-85-5,WB,12,Poecilia reticulata,FT,K1/K2,4.312913357,LogBCF (L/kg bdwt),FW,ArnotGobas,Bioconcentration of Polybrominated Benzenes a Biphenyls a Related Superhydrophobic Chemicals in Fish: Role of Bioavailability a Elimination into the Feces.,"Gobas, F.A.P.C., K.E. Clark, W.Y. Shiu a D. Mackay",1989,Environ. Toxicol. Chem 8:231-245,ClC12C3(Cl)C4(Cl)C5(Cl)C(Cl)(C1(Cl)C4(Cl)Cl)C2(Cl)C(Cl)(Cl)C35Cl
24019-05-4,WB,42,Cyprinus carpio,FT,Cb/Cw,1.869021782,LogBCF (L/kg bdwt),,ArnotGobas,Biodegradation a Bioconcentration of Existing Chemical Substances uer the Chemical Substances Control Law,Chemicals Evaluation a Research Institute,1992,http://qsar.cerij.or.jp/cgi-bin/DEGACC/iex.cgie,OS(=O)(=O)C1=CC(Cl)=CC=C1OC1=CC=C(Cl)C=C1NC(=O)NC1=CC=C(Cl)C(Cl)=C1
2460-49-3,WB,20,Oncorhynchus mykiss,FT,Cb/Cw,2.03,LogBCF (L/kg bdwt),FW,ArnotGobas,Kinetics of Chloroguaiacols a Other Chlorinated Phenolic Derivatives in Rainbow Trout (Salmo gairdneri),"Niimi, A.J., H.B. Lee, a G.P. Kissoon",1990,Environmental Toxicology a Chemistry 9:649-653,COC1=CC(Cl)=C(Cl)C=C1O
2463-84-5,WB,7.01,Poecilia reticulata,FT,Cb/Cw,1.894360376,LogBCF (L/kg bdwt),FW,ArnotGobas,Uptake a Elimination Kinetics of Organophosphorous Pesticides in the Guppy (Poecilia reticulata): Correlations with the Octanol/Water Partition,"De Bruijn, J., a J. Hermens",1991,Environ.Toxicol.Chem. 10(6):791-804,COP(=S)(OC)OC1=CC=C(C=C1Cl)[N+]([O-])=O
2498-66-0,WB,56,Cyprinus carpio,FT,Cb/Cw,1.692455842,LogBCF (L/kg bdwt),,ArnotGobas,Biodegradation a Bioconcentration of Existing Chemical Substances uer the Chemical Substances Control Law,Chemicals Evaluation a Research Institute,1992,http://qsar.cerij.or.jp/cgi-bin/DEGACC/iex.cgie,O=C1C2=CC=CC=C2C(=O)C2=C1C=CC1=CC=CC=C21
2498-66-0,WB,56,Cyprinus carpio,FT,Cb/Cw,1.282484149,LogBCF (L/kg bdwt),,ArnotGobas,Biodegradation a Bioconcentration of Existing Chemical Substances uer the Chemical Substances Control Law,Chemicals Evaluation a Research Institute,1992,http://qsar.cerij.or.jp/cgi-bin/DEGACC/iex.cgie,O=C1C2=CC=CC=C2C(=O)C2=C1C=CC1=CC=CC=C21
25154-54-5,WB,42,Cyprinus carpio,FT,Cb/Cw,1.470051168,LogBCF (L/kg bdwt),,ArnotGobas,Biodegradation a Bioconcentration of Existing Chemical Substances uer the Chemical Substances Control Law,Chemicals Evaluation a Research Institute,1992,http://qsar.cerij.or.jp/cgi-bin/DEGACC/iex.cgie,[O-][N+](=O)C1=CC=CC=C1[N+]([O-])=O
25154-54-5,WB,42,Cyprinus carpio,FT,Cb/Cw,0.556280421,LogBCF (L/kg bdwt),,ArnotGobas,Biodegradation a Bioconcentration of Existing Chemical Substances uer the Chemical Substances Control Law,Chemicals Evaluation a Research Institute,1992,http://qsar.cerij.or.jp/cgi-bin/DEGACC/iex.cgie,[O-][N+](=O)C1=CC=CC=C1[N+]([O-])=O
25311-71-1,WB,5,Poecilia reticulata,FT,Cb/Cw,2.450249108,LogBCF (L/kg bdwt),FW,ArnotGobas,Relationships of Bioconcentration Factors of Organophosphate Pesticides Among Species of Fish,"Tsuda, T., M. Kojima, H. Harada, A. Nakajima, a S. Aoki",1997,Comp.Biochem.Physiol.C 116(3):213-218,CCOP(=S)(NC(C)C)OC1=CC=CC=C1C(=O)OC(C)C
25311-71-1,WB,7.01,Poecilia reticulata,FT,Cb/Cw,2.414973348,LogBCF (L/kg bdwt),FW,ArnotGobas,Relationships of Bioconcentration Factors of Organophosphate Pesticides Among Species of Fish,"Tsuda, T., M. Kojima, H. Harada, A. Nakajima, a S. Aoki",1997,Comp.Biochem.Physiol.C 116(3):213-218,CCOP(=S)(NC(C)C)OC1=CC=CC=C1C(=O)OC(C)C
25311-71-1,WB,7.01,Poecilia reticulata,FT,Cb/Cw,2.225309282,LogBCF (L/kg bdwt),FW,ArnotGobas,Relationships of Bioconcentration Factors of Organophosphate Pesticides Among Species of Fish,"Tsuda, T., M. Kojima, H. Harada, A. Nakajima, a S. Aoki",1997,Comp.Biochem.Physiol.C 116(3):213-218,CCOP(=S)(NC(C)C)OC1=CC=CC=C1C(=O)OC(C)C
25311-71-1,WB,3,Poecilia reticulata,FT,Cb/Cw,2.212187604,LogBCF (L/kg bdwt),FW,ArnotGobas,Relationships of Bioconcentration Factors of Organophosphate Pesticides Among Species of Fish,"Tsuda, T., M. Kojima, H. Harada, A. Nakajima, a S. Aoki",1997,Comp.Biochem.Physiol.C 116(3):213-218,CCOP(=S)(NC(C)C)OC1=CC=CC=C1C(=O)OC(C)C
25311-71-1,WB,3,Poecilia reticulata,FT,Cb/Cw,2.193124598,LogBCF (L/kg bdwt),FW,ArnotGobas,Relationships of Bioconcentration Factors of Organophosphate Pesticides Among Species of Fish,"Tsuda, T., M. Kojima, H. Harada, A. Nakajima, a S. Aoki",1997,Comp.Biochem.Physiol.C 116(3):213-218,CCOP(=S)(NC(C)C)OC1=CC=CC=C1C(=O)OC(C)C
25311-71-1,WB,5,Poecilia reticulata,FT,Cb/Cw,2.190331698,LogBCF (L/kg bdwt),FW,ArnotGobas,Relationships of Bioconcentration Factors of Organophosphate Pesticides Among Species of Fish,"Tsuda, T., M. Kojima, H. Harada, A. Nakajima, a S. Aoki",1997,Comp.Biochem.Physiol.C 116(3):213-218,CCOP(=S)(NC(C)C)OC1=CC=CC=C1C(=O)OC(C)C
25311-71-1,WB,7.01,Oryzias latipes,FT,Cb/Cw,2.136720567,LogBCF (L/kg bdwt),FW,ArnotGobas,Relationships of Bioconcentration Factors of Organophosphate Pesticides Among Species of Fish,"Tsuda, T., M. Kojima, H. Harada, A. Nakajima, a S. Aoki",1997,Comp.Biochem.Physiol.C 116(3):213-218,CCOP(=S)(NC(C)C)OC1=CC=CC=C1C(=O)OC(C)C
25311-71-1,WB,1,Carassius auratus,FT,Cb/Cw,2,LogBCF (L/kg bdwt),FW,ArnotGobas,Relationships of Bioconcentration Factors of Organophosphate Pesticides Among Species of Fish,"Tsuda, T., M. Kojima, H. Harada, A. Nakajima, a S. Aoki",1997,Comp.Biochem.Physiol.C 116(3):213-218,CCOP(=S)(NC(C)C)OC1=CC=CC=C1C(=O)OC(C)C
25311-71-1,WB,3,Carassius auratus,FT,Cb/Cw,1.997386384,LogBCF (L/kg bdwt),FW,ArnotGobas,Relationships of Bioconcentration Factors of Organophosphate Pesticides Among Species of Fish,"Tsuda, T., M. Kojima, H. Harada, A. Nakajima, a S. Aoki",1997,Comp.Biochem.Physiol.C 116(3):213-218,CCOP(=S)(NC(C)C)OC1=CC=CC=C1C(=O)OC(C)C
25311-71-1,WB,5,Carassius auratus,FT,Cb/Cw,1.991226076,LogBCF (L/kg bdwt),FW,ArnotGobas,Relationships of Bioconcentration Factors of Organophosphate Pesticides Among Species of Fish,"Tsuda, T., M. Kojima, H. Harada, A. Nakajima, a S. Aoki",1997,Comp.Biochem.Physiol.C 116(3):213-218,CCOP(=S)(NC(C)C)OC1=CC=CC=C1C(=O)OC(C)C
25311-71-1,WB,5,Oryzias latipes,FT,Cb/Cw,2.100370545,LogBCF (L/kg bdwt),FW,ArnotGobas,Relationships of Bioconcentration Factors of Organophosphate Pesticides Among Species of Fish,"Tsuda, T., M. Kojima, H. Harada, A. Nakajima, a S. Aoki",1997,Comp.Biochem.Physiol.C 116(3):213-218,CCOP(=S)(NC(C)C)OC1=CC=CC=C1C(=O)OC(C)C
25311-71-1,WB,1,Poecilia reticulata,FT,Cb/Cw,1.992553518,LogBCF (L/kg bdwt),FW,ArnotGobas,Relationships of Bioconcentration Factors of Organophosphate Pesticides Among Species of Fish,"Tsuda, T., M. Kojima, H. Harada, A. Nakajima, a S. Aoki",1997,Comp.Biochem.Physiol.C 116(3):213-218,CCOP(=S)(NC(C)C)OC1=CC=CC=C1C(=O)OC(C)C
25311-71-1,WB,3,Oryzias latipes,FT,Cb/Cw,1.946452265,LogBCF (L/kg bdwt),FW,ArnotGobas,Relationships of Bioconcentration Factors of Organophosphate Pesticides Among Species of Fish,"Tsuda, T., M. Kojima, H. Harada, A. Nakajima, a S. Aoki",1997,Comp.Biochem.Physiol.C 116(3):213-218,CCOP(=S)(NC(C)C)OC1=CC=CC=C1C(=O)OC(C)C
25311-71-1,WB,7.01,Carassius auratus,FT,Cb/Cw,1.662757832,LogBCF (L/kg bdwt),FW,ArnotGobas,Relationships of Bioconcentration Factors of Organophosphate Pesticides Among Species of Fish,"Tsuda, T., M. Kojima, H. Harada, A. Nakajima, a S. Aoki",1997,Comp.Biochem.Physiol.C 116(3):213-218,CCOP(=S)(NC(C)C)OC1=CC=CC=C1C(=O)OC(C)C
25311-71-1,WB,1,Oryzias latipes,FT,Cb/Cw,1.727541257,LogBCF (L/kg bdwt),FW,ArnotGobas,Relationships of Bioconcentration Factors of Organophosphate Pesticides Among Species of Fish,"Tsuda, T., M. Kojima, H. Harada, A. Nakajima, a S. Aoki",1997,Comp.Biochem.Physiol.C 116(3):213-218,CCOP(=S)(NC(C)C)OC1=CC=CC=C1C(=O)OC(C)C
25311-71-1,WB,0.5,Oryzias latipes,FT,Cb/Cw,1.645422269,LogBCF (L/kg bdwt),FW,ArnotGobas,Relationships of Bioconcentration Factors of Organophosphate Pesticides Among Species of Fish,"Tsuda, T., M. Kojima, H. Harada, A. Nakajima, a S. Aoki",1997,Comp.Biochem.Physiol.C 116(3):213-218,CCOP(=S)(NC(C)C)OC1=CC=CC=C1C(=O)OC(C)C
25311-71-1,WB,3,Tanichthys albonubes,FT,Cb/Cw,1.404833717,LogBCF (L/kg bdwt),FW,ArnotGobas,Relationships of Bioconcentration Factors of Organophosphate Pesticides Among Species of Fish,"Tsuda, T., M. Kojima, H. Harada, A. Nakajima, a S. Aoki",1997,Comp.Biochem.Physiol.C 116(3):213-218,CCOP(=S)(NC(C)C)OC1=CC=CC=C1C(=O)OC(C)C
25311-71-1,WB,1,Tanichthys albonubes,FT,Cb/Cw,1.382017043,LogBCF (L/kg bdwt),FW,ArnotGobas,Relationships of Bioconcentration Factors of Organophosphate Pesticides Among Species of Fish,"Tsuda, T., M. Kojima, H. Harada, A. Nakajima, a S. Aoki",1997,Comp.Biochem.Physiol.C 116(3):213-218,CCOP(=S)(NC(C)C)OC1=CC=CC=C1C(=O)OC(C)C
25311-71-1,WB,0.5,Tanichthys albonubes,FT,Cb/Cw,1.130333768,LogBCF (L/kg bdwt),FW,ArnotGobas,Relationships of Bioconcentration Factors of Organophosphate Pesticides Among Species of Fish,"Tsuda, T., M. Kojima, H. Harada, A. Nakajima, a S. Aoki",1997,Comp.Biochem.Physiol.C 116(3):213-218,CCOP(=S)(NC(C)C)OC1=CC=CC=C1C(=O)OC(C)C
25323-68-6,WB,28,Cyprinus carpio,FT,Cb/Cw,4.119021782,LogBCF (L/kg bdwt),,ArnotGobas,Biodegradation a Bioconcentration of Existing Chemical Substances uer the Chemical Substances Control Law,Chemicals Evaluation a Research Institute,1992,http://qsar.cerij.or.jp/cgi-bin/DEGACC/iex.cgie,ClC1=CC=C(C(Cl)=C1Cl)C1=CC=CC=C1
25323-68-6,WB,28,Cyprinus carpio,FT,Cb/Cw,4.028252748,LogBCF (L/kg bdwt),,ArnotGobas,Biodegradation a Bioconcentration of Existing Chemical Substances uer the Chemical Substances Control Law,Chemicals Evaluation a Research Institute,1992,http://qsar.cerij.or.jp/cgi-bin/DEGACC/iex.cgie,ClC1=CC=C(C(Cl)=C1Cl)C1=CC=CC=C1
2539-17-5,WB,6,Salmo salar,Semi-S,Cb/Cw,3.146128036,LogBCF (L/kg bdwt),FW,ArnotGobas,Influence of Aquatic Humus on the Bioavailability of Chlorinated Micropollutants in Atlantic Salmon.,"Carlberg, G.E. et al",1986,Arch.Environ.Contam.Toxicol. 15:543-548,COC1=C(O)C(Cl)=C(Cl)C(Cl)=C1Cl
2539-17-5,WB,6,Salmo salar,Semi-S,Cb/Cw,3.079181246,LogBCF (L/kg bdwt),Humic water,ArnotGobas,Influence of Aquatic Humus on the Bioavailability of Chlorinated Micropollutants in Atlantic Salmon.,"Carlberg, G.E. et al",1986,Arch.Environ.Contam.Toxicol. 15:543-548,COC1=C(O)C(Cl)=C(Cl)C(Cl)=C1Cl
2539-17-5,WB,20,Oncorhynchus mykiss,FT,Cb/Cw,2.26,LogBCF (L/kg bdwt),FW,ArnotGobas,Kinetics of Chloroguaiacols a Other Chlorinated Phenolic Derivatives in Rainbow Trout (Salmo gairdneri),"Niimi, A.J., H.B. Lee, a G.P. Kissoon",1990,Environmental Toxicology a Chemistry 9:649-653,COC1=C(O)C(Cl)=C(Cl)C(Cl)=C1Cl
25394-13-2,WB,42,Cyprinus carpio,FT,Cb/Cw,0.28,LogBCF (L/kg bdwt),,ArnotGobas,Biodegradation a Bioconcentration of Existing Chemical Substances uer the Chemical Substances Control Law,Chemicals Evaluation a Research Institute,1992,http://qsar.cerij.or.jp/cgi-bin/DEGACC/iex.cgie,NC1=CC=C(C=CC2=CC=C(N)C=C2S(O)(=O)=O)C(=C1)S(O)(=O)=O
25394-13-2,WB,42,Cyprinus carpio,FT,Cb/Cw,-0.7,LogBCF (L/kg bdwt),,ArnotGobas,Biodegradation a Bioconcentration of Existing Chemical Substances uer the Chemical Substances Control Law,Chemicals Evaluation a Research Institute,1992,http://qsar.cerij.or.jp/cgi-bin/DEGACC/iex.cgie,NC1=CC=C(C=CC2=CC=C(N)C=C2S(O)(=O)=O)C(=C1)S(O)(=O)=O
16605-91-7,WB,56,Cyprinus carpio,FT,Cb/Cw,4.098318956,LogBCF (L/kg bdwt),,ArnotGobas,Biodegradation a Bioconcentration of Existing Chemical Substances uer the Chemical Substances Control Law,Chemicals Evaluation a Research Institute,1992,http://qsar.cerij.or.jp/cgi-bin/DEGACC/iex.cgie,ClC1=CC=CC(=C1Cl)C1=CC=CC=C1
16605-91-7,WB,56,Cyprinus carpio,FT,Cb/Cw,3.754155168,LogBCF (L/kg bdwt),,ArnotGobas,Biodegradation a Bioconcentration of Existing Chemical Substances uer the Chemical Substances Control Law,Chemicals Evaluation a Research Institute,1992,http://qsar.cerij.or.jp/cgi-bin/DEGACC/iex.cgie,ClC1=CC=CC(=C1Cl)C1=CC=CC=C1
2581-34-2,WB,42,Cyprinus carpio,FT,Cb/Cw,1.257090667,LogBCF (L/kg bdwt),,ArnotGobas,Biodegradation a Bioconcentration of Existing Chemical Substances uer the Chemical Substances Control Law,Chemicals Evaluation a Research Institute,1992,http://qsar.cerij.or.jp/cgi-bin/DEGACC/iex.cgie,CC1=CC(O)=CC=C1[N+]([O-])=O
2581-34-2,WB,42,Cyprinus carpio,FT,Cb/Cw,1.060849484,LogBCF (L/kg bdwt),,ArnotGobas,Biodegradation a Bioconcentration of Existing Chemical Substances uer the Chemical Substances Control Law,Chemicals Evaluation a Research Institute,1992,http://qsar.cerij.or.jp/cgi-bin/DEGACC/iex.cgie,CC1=CC(O)=CC=C1[N+]([O-])=O
26087-47-8,WB,14,Pseudorasbora parva,FT,Cb/Cw,0.602059991,LogBCF (L/kg bdwt),FW,ArnotGobas,Measurement of the Bioconcentration Factors of Pesticides by Freshwater Fish a Their Correlation with Physicochemical Properties or Acute Toxicities,"Kanazawa, J.",1981,Pestic.Sci. 12(4):417-424,CC(C)OP(=O)(OC(C)C)SCC1=CC=CC=C1
26087-47-8,WB,5,Poecilia reticulata,FT,Cb/Cw,1.278753601,LogBCF (L/kg bdwt),FW,ArnotGobas,Relationships of Bioconcentration Factors of Organophosphate Pesticides Among Species of Fish,"Tsuda, T., M. Kojima, H. Harada, A. Nakajima, a S. Aoki",1997,Comp.Biochem.Physiol.C 116(3):213-218,CC(C)OP(=O)(OC(C)C)SCC1=CC=CC=C1
26087-47-8,WB,5,Poecilia reticulata,FT,Cb/Cw,1.178976947,LogBCF (L/kg bdwt),FW,ArnotGobas,Relationships of Bioconcentration Factors of Organophosphate Pesticides Among Species of Fish,"Tsuda, T., M. Kojima, H. Harada, A. Nakajima, a S. Aoki",1997,Comp.Biochem.Physiol.C 116(3):213-218,CC(C)OP(=O)(OC(C)C)SCC1=CC=CC=C1
26087-47-8,WB,3,Poecilia reticulata,FT,Cb/Cw,1.133538908,LogBCF (L/kg bdwt),FW,ArnotGobas,Relationships of Bioconcentration Factors of Organophosphate Pesticides Among Species of Fish,"Tsuda, T., M. Kojima, H. Harada, A. Nakajima, a S. Aoki",1997,Comp.Biochem.Physiol.C 116(3):213-218,CC(C)OP(=O)(OC(C)C)SCC1=CC=CC=C1
26087-47-8,WB,3,Poecilia reticulata,FT,Cb/Cw,1.120573931,LogBCF (L/kg bdwt),FW,ArnotGobas,Relationships of Bioconcentration Factors of Organophosphate Pesticides Among Species of Fish,"Tsuda, T., M. Kojima, H. Harada, A. Nakajima, a S. Aoki",1997,Comp.Biochem.Physiol.C 116(3):213-218,CC(C)OP(=O)(OC(C)C)SCC1=CC=CC=C1
26087-47-8,WB,0.25,Carassius auratus,FT,Cb/Cw,0.986771734,LogBCF (L/kg bdwt),FW,ArnotGobas,Relationships of Bioconcentration Factors of Organophosphate Pesticides Among Species of Fish,"Tsuda, T., M. Kojima, H. Harada, A. Nakajima, a S. Aoki",1997,Comp.Biochem.Physiol.C 116(3):213-218,CC(C)OP(=O)(OC(C)C)SCC1=CC=CC=C1
26087-47-8,WB,3,Carassius auratus,FT,Cb/Cw,0.959041392,LogBCF (L/kg bdwt),FW,ArnotGobas,Relationships of Bioconcentration Factors of Organophosphate Pesticides Among Species of Fish,"Tsuda, T., M. Kojima, H. Harada, A. Nakajima, a S. Aoki",1997,Comp.Biochem.Physiol.C 116(3):213-218,CC(C)OP(=O)(OC(C)C)SCC1=CC=CC=C1
26087-47-8,WB,0.5,Carassius auratus,FT,Cb/Cw,0.954242509,LogBCF (L/kg bdwt),FW,ArnotGobas,Relationships of Bioconcentration Factors of Organophosphate Pesticides Among Species of Fish,"Tsuda, T., M. Kojima, H. Harada, A. Nakajima, a S. Aoki",1997,Comp.Biochem.Physiol.C 116(3):213-218,CC(C)OP(=O)(OC(C)C)SCC1=CC=CC=C1
26087-47-8,WB,0.5,Poecilia reticulata,FT,Cb/Cw,1.071882007,LogBCF (L/kg bdwt),FW,ArnotGobas,Relationships of Bioconcentration Factors of Organophosphate Pesticides Among Species of Fish,"Tsuda, T., M. Kojima, H. Harada, A. Nakajima, a S. Aoki",1997,Comp.Biochem.Physiol.C 116(3):213-218,CC(C)OP(=O)(OC(C)C)SCC1=CC=CC=C1
26087-47-8,WB,7.01,Poecilia reticulata,FT,Cb/Cw,1.064457989,LogBCF (L/kg bdwt),FW,ArnotGobas,Relationships of Bioconcentration Factors of Organophosphate Pesticides Among Species of Fish,"Tsuda, T., M. Kojima, H. Harada, A. Nakajima, a S. Aoki",1997,Comp.Biochem.Physiol.C 116(3):213-218,CC(C)OP(=O)(OC(C)C)SCC1=CC=CC=C1
26087-47-8,WB,7.01,Carassius auratus,FT,Cb/Cw,0.939519253,LogBCF (L/kg bdwt),FW,ArnotGobas,Relationships of Bioconcentration Factors of Organophosphate Pesticides Among Species of Fish,"Tsuda, T., M. Kojima, H. Harada, A. Nakajima, a S. Aoki",1997,Comp.Biochem.Physiol.C 116(3):213-218,CC(C)OP(=O)(OC(C)C)SCC1=CC=CC=C1
26087-47-8,WB,5,Carassius auratus,FT,Cb/Cw,0.919078092,LogBCF (L/kg bdwt),FW,ArnotGobas,Relationships of Bioconcentration Factors of Organophosphate Pesticides Among Species of Fish,"Tsuda, T., M. Kojima, H. Harada, A. Nakajima, a S. Aoki",1997,Comp.Biochem.Physiol.C 116(3):213-218,CC(C)OP(=O)(OC(C)C)SCC1=CC=CC=C1
26087-47-8,WB,7.01,Poecilia reticulata,FT,Cb/Cw,1.029383778,LogBCF (L/kg bdwt),FW,ArnotGobas,Relationships of Bioconcentration Factors of Organophosphate Pesticides Among Species of Fish,"Tsuda, T., M. Kojima, H. Harada, A. Nakajima, a S. Aoki",1997,Comp.Biochem.Physiol.C 116(3):213-218,CC(C)OP(=O)(OC(C)C)SCC1=CC=CC=C1
26087-47-8,WB,1,Carassius auratus,FT,Cb/Cw,0.903089987,LogBCF (L/kg bdwt),FW,ArnotGobas,Relationships of Bioconcentration Factors of Organophosphate Pesticides Among Species of Fish,"Tsuda, T., M. Kojima, H. Harada, A. Nakajima, a S. Aoki",1997,Comp.Biochem.Physiol.C 116(3):213-218,CC(C)OP(=O)(OC(C)C)SCC1=CC=CC=C1
26087-47-8,WB,1,Poecilia reticulata,FT,Cb/Cw,1.008600172,LogBCF (L/kg bdwt),FW,ArnotGobas,Relationships of Bioconcentration Factors of Organophosphate Pesticides Among Species of Fish,"Tsuda, T., M. Kojima, H. Harada, A. Nakajima, a S. Aoki",1997,Comp.Biochem.Physiol.C 116(3):213-218,CC(C)OP(=O)(OC(C)C)SCC1=CC=CC=C1
26087-47-8,WB,1,Poecilia reticulata,FT,Cb/Cw,1.008600172,LogBCF (L/kg bdwt),FW,ArnotGobas,Relationships of Bioconcentration Factors of Organophosphate Pesticides Among Species of Fish,"Tsuda, T., M. Kojima, H. Harada, A. Nakajima, a S. Aoki",1997,Comp.Biochem.Physiol.C 116(3):213-218,CC(C)OP(=O)(OC(C)C)SCC1=CC=CC=C1
26087-47-8,WB,7.01,Oryzias latipes,FT,Cb/Cw,1.029383778,LogBCF (L/kg bdwt),FW,ArnotGobas,Relationships of Bioconcentration Factors of Organophosphate Pesticides Among Species of Fish,"Tsuda, T., M. Kojima, H. Harada, A. Nakajima, a S. Aoki",1997,Comp.Biochem.Physiol.C 116(3):213-218,CC(C)OP(=O)(OC(C)C)SCC1=CC=CC=C1
26087-47-8,WB,0.25,Poecilia reticulata,FT,Cb/Cw,0.968482949,LogBCF (L/kg bdwt),FW,ArnotGobas,Relationships of Bioconcentration Factors of Organophosphate Pesticides Among Species of Fish,"Tsuda, T., M. Kojima, H. Harada, A. Nakajima, a S. Aoki",1997,Comp.Biochem.Physiol.C 116(3):213-218,CC(C)OP(=O)(OC(C)C)SCC1=CC=CC=C1
26087-47-8,WB,5,Oryzias latipes,FT,Cb/Cw,0.991226076,LogBCF (L/kg bdwt),FW,ArnotGobas,Relationships of Bioconcentration Factors of Organophosphate Pesticides Among Species of Fish,"Tsuda, T., M. Kojima, H. Harada, A. Nakajima, a S. Aoki",1997,Comp.Biochem.Physiol.C 116(3):213-218,CC(C)OP(=O)(OC(C)C)SCC1=CC=CC=C1
26087-47-8,WB,0.25,Poecilia reticulata,FT,Cb/Cw,0.929418926,LogBCF (L/kg bdwt),FW,ArnotGobas,Relationships of Bioconcentration Factors of Organophosphate Pesticides Among Species of Fish,"Tsuda, T., M. Kojima, H. Harada, A. Nakajima, a S. Aoki",1997,Comp.Biochem.Physiol.C 116(3):213-218,CC(C)OP(=O)(OC(C)C)SCC1=CC=CC=C1
26087-47-8,WB,0.5,Poecilia reticulata,FT,Cb/Cw,0.929418926,LogBCF (L/kg bdwt),FW,ArnotGobas,Relationships of Bioconcentration Factors of Organophosphate Pesticides Among Species of Fish,"Tsuda, T., M. Kojima, H. Harada, A. Nakajima, a S. Aoki",1997,Comp.Biochem.Physiol.C 116(3):213-218,CC(C)OP(=O)(OC(C)C)SCC1=CC=CC=C1
26087-47-8,WB,3,Oryzias latipes,FT,Cb/Cw,0.949390007,LogBCF (L/kg bdwt),FW,ArnotGobas,Relationships of Bioconcentration Factors of Organophosphate Pesticides Among Species of Fish,"Tsuda, T., M. Kojima, H. Harada, A. Nakajima, a S. Aoki",1997,Comp.Biochem.Physiol.C 116(3):213-218,CC(C)OP(=O)(OC(C)C)SCC1=CC=CC=C1
26087-47-8,WB,1,Oryzias latipes,FT,Cb/Cw,0.903089987,LogBCF (L/kg bdwt),FW,ArnotGobas,Relationships of Bioconcentration Factors of Organophosphate Pesticides Among Species of Fish,"Tsuda, T., M. Kojima, H. Harada, A. Nakajima, a S. Aoki",1997,Comp.Biochem.Physiol.C 116(3):213-218,CC(C)OP(=O)(OC(C)C)SCC1=CC=CC=C1
26087-47-8,WB,0.5,Oryzias latipes,FT,Cb/Cw,0.857332496,LogBCF (L/kg bdwt),FW,ArnotGobas,Relationships of Bioconcentration Factors of Organophosphate Pesticides Among Species of Fish,"Tsuda, T., M. Kojima, H. Harada, A. Nakajima, a S. Aoki",1997,Comp.Biochem.Physiol.C 116(3):213-218,CC(C)OP(=O)(OC(C)C)SCC1=CC=CC=C1
26087-47-8,WB,0.25,Oryzias latipes,FT,Cb/Cw,0.748188027,LogBCF (L/kg bdwt),FW,ArnotGobas,Relationships of Bioconcentration Factors of Organophosphate Pesticides Among Species of Fish,"Tsuda, T., M. Kojima, H. Harada, A. Nakajima, a S. Aoki",1997,Comp.Biochem.Physiol.C 116(3):213-218,CC(C)OP(=O)(OC(C)C)SCC1=CC=CC=C1
26087-47-8,WB,3,Tanichthys albonubes,FT,Cb/Cw,0.851258349,LogBCF (L/kg bdwt),FW,ArnotGobas,Relationships of Bioconcentration Factors of Organophosphate Pesticides Among Species of Fish,"Tsuda, T., M. Kojima, H. Harada, A. Nakajima, a S. Aoki",1997,Comp.Biochem.Physiol.C 116(3):213-218,CC(C)OP(=O)(OC(C)C)SCC1=CC=CC=C1
26087-47-8,WB,1,Tanichthys albonubes,FT,Cb/Cw,0.84509804,LogBCF (L/kg bdwt),FW,ArnotGobas,Relationships of Bioconcentration Factors of Organophosphate Pesticides Among Species of Fish,"Tsuda, T., M. Kojima, H. Harada, A. Nakajima, a S. Aoki",1997,Comp.Biochem.Physiol.C 116(3):213-218,CC(C)OP(=O)(OC(C)C)SCC1=CC=CC=C1
26087-47-8,WB,0.25,Tanichthys albonubes,FT,Cb/Cw,0.51851394,LogBCF (L/kg bdwt),FW,ArnotGobas,Relationships of Bioconcentration Factors of Organophosphate Pesticides Among Species of Fish,"Tsuda, T., M. Kojima, H. Harada, A. Nakajima, a S. Aoki",1997,Comp.Biochem.Physiol.C 116(3):213-218,CC(C)OP(=O)(OC(C)C)SCC1=CC=CC=C1
26087-47-8,WB,0.5,Tanichthys albonubes,FT,Cb/Cw,0.505149978,LogBCF (L/kg bdwt),FW,ArnotGobas,Relationships of Bioconcentration Factors of Organophosphate Pesticides Among Species of Fish,"Tsuda, T., M. Kojima, H. Harada, A. Nakajima, a S. Aoki",1997,Comp.Biochem.Physiol.C 116(3):213-218,CC(C)OP(=O)(OC(C)C)SCC1=CC=CC=C1
26087-47-8,WB,1.6,Oryzias latipes,FT,Cb/Cw,0.707570176,LogBCF (L/kg bdwt),FW,ArnotGobas,"Accumulation of IBP, Parathion a EPN by Killifish: Comparison of Iividual a Mixed Pesticides","Tsuda, T., S. Aoki, T. Inoue, a M. Kojima",1995,Comp.Biochem.Physiol.C 111(1):19-22,CC(C)OP(=O)(OC(C)C)SCC1=CC=CC=C1
2631-40-5,WB,42,Cyprinus carpio,FT,Cb/Cw,0.945653168,LogBCF (L/kg bdwt),,ArnotGobas,Biodegradation a Bioconcentration of Existing Chemical Substances uer the Chemical Substances Control Law,Chemicals Evaluation a Research Institute,1992,http://qsar.cerij.or.jp/cgi-bin/DEGACC/iex.cgie,CNC(=O)OC1=CC=CC=C1C(C)C
2631-40-5,WB,42,Cyprinus carpio,FT,Cb/Cw,0.413784191,LogBCF (L/kg bdwt),,ArnotGobas,Biodegradation a Bioconcentration of Existing Chemical Substances uer the Chemical Substances Control Law,Chemicals Evaluation a Research Institute,1992,http://qsar.cerij.or.jp/cgi-bin/DEGACC/iex.cgie,CNC(=O)OC1=CC=CC=C1C(C)C
2636-26-2,WB,7.01,Poecilia reticulata,FT,Cb/Cw,1.564618727,LogBCF (L/kg bdwt),FW,ArnotGobas,Uptake a Elimination Kinetics of Organophosphorous Pesticides in the Guppy (Poecilia reticulata): Correlations with the Octanol/Water Partition,"De Bruijn, J., a J. Hermens",1991,Environ.Toxicol.Chem. 10(6):791-804,COP(=S)(OC)OC1=CC=C(C=C1)C#N
2655-14-3,WB,42,Cyprinus carpio,FT,Cb/Cw,0.28,LogBCF (L/kg bdwt),,ArnotGobas,Biodegradation a Bioconcentration of Existing Chemical Substances uer the Chemical Substances Control Law,Chemicals Evaluation a Research Institute,1992,http://qsar.cerij.or.jp/cgi-bin/DEGACC/iex.cgie,CNC(=O)OC1=CC(C)=CC(C)=C1
2655-14-3,WB,42,Cyprinus carpio,FT,Cb/Cw,0.218301052,LogBCF (L/kg bdwt),,ArnotGobas,Biodegradation a Bioconcentration of Existing Chemical Substances uer the Chemical Substances Control Law,Chemicals Evaluation a Research Institute,1992,http://qsar.cerij.or.jp/cgi-bin/DEGACC/iex.cgie,CNC(=O)OC1=CC(C)=CC(C)=C1
26601-64-9,WB,28,Cyprinus carpio,FT,Cb/Cw,3.772484149,LogBCF (L/kg bdwt),,ArnotGobas,Biodegradation a Bioconcentration of Existing Chemical Substances uer the Chemical Substances Control Law,Chemicals Evaluation a Research Institute,1992,http://qsar.cerij.or.jp/cgi-bin/DEGACC/iex.cgie,ClC1=CC=CC=C1C1=C(Cl)C(Cl)=C(Cl)C(Cl)=C1Cl
2668-24-8,WB,14,Alburnus alburnus,FT,,2.602059991,LogBCF (L/kg bdwt),SW,ArnotGobas,"Chlorinated Guaiacols a Catechols Bioaccumulation Potential in Bleaks (Alburnus alburnus, Pisces) a Reproductive a Toxic Effects on the","Renberg, L., O. Svanberg, B.E. Bengtsson, a G. Sustrom",1980,Chemosphere 9(3):143-150,COC1=CC(Cl)=C(Cl)C(Cl)=C1O
2668-24-8,WB,20,Oncorhynchus mykiss,FT,Cb/Cw,1.97,LogBCF (L/kg bdwt),FW,ArnotGobas,Kinetics of Chloroguaiacols a Other Chlorinated Phenolic Derivatives in Rainbow Trout (Salmo gairdneri),"Niimi, A.J., H.B. Lee, a G.P. Kissoon",1990,Environmental Toxicology a Chemistry 9:649-653,COC1=CC(Cl)=C(Cl)C(Cl)=C1O
26787-65-5,WB,42,Cyprinus carpio,FT,Cb/Cw,1.31029982,LogBCF (L/kg bdwt),FW,ArnotGobas,Biodegradation a Bioconcentration of Existing Chemical Substances uer the Chemical Substances Control Law,National Institute of Technology a Evaluation,2005,http://www.nite.go.jp/iex-e.html,CCCCCCCCCCCCCCCCCCCCCCCCCCCC(=O)OCCO
26787-65-5,WB,42,Cyprinus carpio,FT,Cb/Cw,0.823177226,LogBCF (L/kg bdwt),FW,ArnotGobas,Biodegradation a Bioconcentration of Existing Chemical Substances uer the Chemical Substances Control Law,National Institute of Technology a Evaluation,2005,http://www.nite.go.jp/iex-e.html,CCCCCCCCCCCCCCCCCCCCCCCCCCCC(=O)OCCO
26914-33-0,WB,28,Cyprinus carpio,FT,Cb/Cw,4.176176972,LogBCF (L/kg bdwt),,ArnotGobas,Biodegradation a Bioconcentration of Existing Chemical Substances uer the Chemical Substances Control Law,Chemicals Evaluation a Research Institute,1992,http://qsar.cerij.or.jp/cgi-bin/DEGACC/iex.cgie,ClC1=CC=C(Cl)C(=C1)C1=C(Cl)C=CC=C1Cl
26914-33-0,WB,28,Cyprinus carpio,FT,Cb/Cw,4.098318956,LogBCF (L/kg bdwt),,ArnotGobas,Biodegradation a Bioconcentration of Existing Chemical Substances uer the Chemical Substances Control Law,Chemicals Evaluation a Research Institute,1992,http://qsar.cerij.or.jp/cgi-bin/DEGACC/iex.cgie,ClC1=CC=C(Cl)C(=C1)C1=C(Cl)C=CC=C1Cl
2814-20-2,WB,42,Cyprinus carpio,FT,Cb/Cw,0.255308595,LogBCF (L/kg bdwt),,ArnotGobas,Biodegradation a Bioconcentration of Existing Chemical Substances uer the Chemical Substances Control Law,Chemicals Evaluation a Research Institute,1992,http://qsar.cerij.or.jp/cgi-bin/DEGACC/iex.cgie,CC(C)C1=NC(=O)C=C(C)N1
2814-20-2,WB,42,Cyprinus carpio,FT,Cb/Cw,0.020208406,LogBCF (L/kg bdwt),,ArnotGobas,Biodegradation a Bioconcentration of Existing Chemical Substances uer the Chemical Substances Control Law,Chemicals Evaluation a Research Institute,1992,http://qsar.cerij.or.jp/cgi-bin/DEGACC/iex.cgie,CC(C)C1=NC(=O)C=C(C)N1
28249-77-6,WB,7.5,Pseudorasbora parva,FT,Cb/Cw,2.230448921,LogBCF (L/kg bdwt),FW,ArnotGobas,Measurement of the Bioconcentration Factors of Pesticides by Freshwater Fish a Their Correlation with Physicochemical Properties or Acute Toxicities,"Kanazawa, J.",1981,Pestic.Sci. 12(4):417-424,CCN(CC)C(=O)SCC1=CC=C(Cl)C=C1
28249-77-6,WB,4,Oryzias latipes,FT,Cb/Cw,2.474216264,LogBCF (L/kg bdwt),FW,ArnotGobas,"Acute Toxicity, Accumulation, a Excretion of Benthiocarb a Its Degradation Products in Killifish","Tsuda, T., M. Kojima, H. Harada, A. Nakajima, a S. Aoki",1997,Bull.Environ.Contam.Toxicol. 58:603-610,CCN(CC)C(=O)SCC1=CC=C(Cl)C=C1
28249-77-6,WB,2,Oryzias latipes,FT,Cb/Cw,2.463892989,LogBCF (L/kg bdwt),FW,ArnotGobas,"Acute Toxicity, Accumulation, a Excretion of Benthiocarb a Its Degradation Products in Killifish","Tsuda, T., M. Kojima, H. Harada, A. Nakajima, a S. Aoki",1997,Bull.Environ.Contam.Toxicol. 58:603-610,CCN(CC)C(=O)SCC1=CC=C(Cl)C=C1
28249-77-6,WB,1,Oryzias latipes,FT,Cb/Cw,2.36361198,LogBCF (L/kg bdwt),FW,ArnotGobas,"Acute Toxicity, Accumulation, a Excretion of Benthiocarb a Its Degradation Products in Killifish","Tsuda, T., M. Kojima, H. Harada, A. Nakajima, a S. Aoki",1997,Bull.Environ.Contam.Toxicol. 58:603-610,CCN(CC)C(=O)SCC1=CC=C(Cl)C=C1
28249-77-6,WB,0.5,Oryzias latipes,FT,Cb/Cw,2.214843848,LogBCF (L/kg bdwt),FW,ArnotGobas,"Acute Toxicity, Accumulation, a Excretion of Benthiocarb a Its Degradation Products in Killifish","Tsuda, T., M. Kojima, H. Harada, A. Nakajima, a S. Aoki",1997,Bull.Environ.Contam.Toxicol. 58:603-610,CCN(CC)C(=O)SCC1=CC=C(Cl)C=C1
28575-17-9,WB,60,Cyprinus carpio,FT,Cb/Cw,3.832508913,LogBCF (L/kg bdwt),,ArnotGobas,Biodegradation a Bioconcentration of Existing Chemical Substances uer the Chemical Substances Control Law,National Institute of Technology a Evaluation,2005,http://www.nite.go.jp/iex-e.html,CCC1=CC=C(C=C1)C1=CC=C(CC)C=C1
28575-17-9,WB,60,Cyprinus carpio,FT,Cb/Cw,3.763427994,LogBCF (L/kg bdwt),,ArnotGobas,Biodegradation a Bioconcentration of Existing Chemical Substances uer the Chemical Substances Control Law,National Institute of Technology a Evaluation,2005,http://www.nite.go.jp/iex-e.html,CCC1=CC=C(C=C1)C1=CC=C(CC)C=C1
28680-45-7,WB,30,Pimephales promelas,FT,Cb/Cw,4.049218023,LogBCF (L/kg bdwt),FW,ArnotGobas,"Toxicity a Bioaccumulation of Hexachlorocyclopentadiene, Hexachloronorbornadiene a Heptachloronorbornene in Larval a Early Juvenile Fathead Minnows, Pimephales promelas","Spehar, R.L., G.D. Veith, D.L. De Foe, a B.V. Bergstedt",1979,Bull.Environ.Contam.Toxicol. 21(4/5):576-583,ClC1C2(Cl)C=CC1(Cl)C(Cl)(Cl)C2(Cl)Cl
2921-88-2,WB,7,Poecilia reticulata,FT,Cb/Cw,3.526726867,LogBCF (L/kg bdwt),FW,ArnotGobas,Uptake a Elimination of  Chlorpyrifos in the Guppy at Sublethal a Lethal Aqueous Concentrations.,"Deneer, J.W.",1993,Chemosphere 26(9):1607-1616,CCOP(=S)(OCC)OC1=NC(Cl)=C(Cl)C=C1Cl
2921-88-2,WB,28,Cyprinodon variegatus,FT,Cb/Cw,3.26245109,LogBCF (L/kg bdwt),SW,ArnotGobas,Effects of Diet Quantity on Sheepshead Minnows (Cyprinodon variegatus) During Early Life-Stage Exposures to Chlorpyrifos,"Cripe, G.M., D.J. Hansen, S.F. MaCauley, a J. Forester",1986,"In: T.M.Poston a R.Purdy (Eds.), Aquatic Toxicology a Environmental Fate, 9th Volume, ASTM STP 921, Philadelphia, PA:450-460",CCOP(=S)(OCC)OC1=NC(Cl)=C(Cl)C=C1Cl
2921-88-2,WB,28,Cyprinodon variegatus,FT,Cb/Cw,3.161368002,LogBCF (L/kg bdwt),SW,ArnotGobas,Effects of Diet Quantity on Sheepshead Minnows (Cyprinodon variegatus) During Early Life-Stage Exposures to Chlorpyrifos,"Cripe, G.M., D.J. Hansen, S.F. MaCauley, a J. Forester",1986,"In: T.M.Poston a R.Purdy (Eds.), Aquatic Toxicology a Environmental Fate, 9th Volume, ASTM STP 921, Philadelphia, PA:450-460",CCOP(=S)(OCC)OC1=NC(Cl)=C(Cl)C=C1Cl
2921-88-2,WB,28,Cyprinodon variegatus,FT,Cb/Cw,3.029383778,LogBCF (L/kg bdwt),SW,ArnotGobas,Effects of Diet Quantity on Sheepshead Minnows (Cyprinodon variegatus) During Early Life-Stage Exposures to Chlorpyrifos,"Cripe, G.M., D.J. Hansen, S.F. MaCauley, a J. Forester",1986,"In: T.M.Poston a R.Purdy (Eds.), Aquatic Toxicology a Environmental Fate, 9th Volume, ASTM STP 921, Philadelphia, PA:450-460",CCOP(=S)(OCC)OC1=NC(Cl)=C(Cl)C=C1Cl
2921-88-2,WB,28,Cyprinodon variegatus,FT,Cb/Cw,3,LogBCF (L/kg bdwt),SW,ArnotGobas,Effects of Diet Quantity on Sheepshead Minnows (Cyprinodon variegatus) During Early Life-Stage Exposures to Chlorpyrifos,"Cripe, G.M., D.J. Hansen, S.F. MaCauley, a J. Forester",1986,"In: T.M.Poston a R.Purdy (Eds.), Aquatic Toxicology a Environmental Fate, 9th Volume, ASTM STP 921, Philadelphia, PA:450-460",CCOP(=S)(OCC)OC1=NC(Cl)=C(Cl)C=C1Cl
2921-88-2,WB,28,Cyprinodon variegatus,FT,Cb/Cw,3,LogBCF (L/kg bdwt),SW,ArnotGobas,Effects of Diet Quantity on Sheepshead Minnows (Cyprinodon variegatus) During Early Life-Stage Exposures to Chlorpyrifos,"Cripe, G.M., D.J. Hansen, S.F. MaCauley, a J. Forester",1986,"In: T.M.Poston a R.Purdy (Eds.), Aquatic Toxicology a Environmental Fate, 9th Volume, ASTM STP 921, Philadelphia, PA:450-460",CCOP(=S)(OCC)OC1=NC(Cl)=C(Cl)C=C1Cl
2921-88-2,WB,28,Cyprinodon variegatus,FT,Cb/Cw,2.986771734,LogBCF (L/kg bdwt),SW,ArnotGobas,Effects of Diet Quantity on Sheepshead Minnows (Cyprinodon variegatus) During Early Life-Stage Exposures to Chlorpyrifos,"Cripe, G.M., D.J. Hansen, S.F. MaCauley, a J. Forester",1986,"In: T.M.Poston a R.Purdy (Eds.), Aquatic Toxicology a Environmental Fate, 9th Volume, ASTM STP 921, Philadelphia, PA:450-460",CCOP(=S)(OCC)OC1=NC(Cl)=C(Cl)C=C1Cl
2921-88-2,WB,28,Cyprinodon variegatus,FT,Cb/Cw,2.929418926,LogBCF (L/kg bdwt),SW,ArnotGobas,Effects of Diet Quantity on Sheepshead Minnows (Cyprinodon variegatus) During Early Life-Stage Exposures to Chlorpyrifos,"Cripe, G.M., D.J. Hansen, S.F. MaCauley, a J. Forester",1986,"In: T.M.Poston a R.Purdy (Eds.), Aquatic Toxicology a Environmental Fate, 9th Volume, ASTM STP 921, Philadelphia, PA:450-460",CCOP(=S)(OCC)OC1=NC(Cl)=C(Cl)C=C1Cl
2921-88-2,WB,28,Cyprinodon variegatus,FT,Cb/Cw,2.86923172,LogBCF (L/kg bdwt),SW,ArnotGobas,Effects of Diet Quantity on Sheepshead Minnows (Cyprinodon variegatus) During Early Life-Stage Exposures to Chlorpyrifos,"Cripe, G.M., D.J. Hansen, S.F. MaCauley, a J. Forester",1986,"In: T.M.Poston a R.Purdy (Eds.), Aquatic Toxicology a Environmental Fate, 9th Volume, ASTM STP 921, Philadelphia, PA:450-460",CCOP(=S)(OCC)OC1=NC(Cl)=C(Cl)C=C1Cl
2921-88-2,WB,28,Cyprinodon variegatus,FT,Cb/Cw,2.84509804,LogBCF (L/kg bdwt),SW,ArnotGobas,Effects of Diet Quantity on Sheepshead Minnows (Cyprinodon variegatus) During Early Life-Stage Exposures to Chlorpyrifos,"Cripe, G.M., D.J. Hansen, S.F. MaCauley, a J. Forester",1986,"In: T.M.Poston a R.Purdy (Eds.), Aquatic Toxicology a Environmental Fate, 9th Volume, ASTM STP 921, Philadelphia, PA:450-460",CCOP(=S)(OCC)OC1=NC(Cl)=C(Cl)C=C1Cl
2921-88-2,WB,28,Cyprinodon variegatus,FT,Cb/Cw,2.84509804,LogBCF (L/kg bdwt),SW,ArnotGobas,Effects of Diet Quantity on Sheepshead Minnows (Cyprinodon variegatus) During Early Life-Stage Exposures to Chlorpyrifos,"Cripe, G.M., D.J. Hansen, S.F. MaCauley, a J. Forester",1986,"In: T.M.Poston a R.Purdy (Eds.), Aquatic Toxicology a Environmental Fate, 9th Volume, ASTM STP 921, Philadelphia, PA:450-460",CCOP(=S)(OCC)OC1=NC(Cl)=C(Cl)C=C1Cl
2921-88-2,WB,28,Cyprinodon variegatus,FT,Cb/Cw,2.819543936,LogBCF (L/kg bdwt),SW,ArnotGobas,Effects of Diet Quantity on Sheepshead Minnows (Cyprinodon variegatus) During Early Life-Stage Exposures to Chlorpyrifos,"Cripe, G.M., D.J. Hansen, S.F. MaCauley, a J. Forester",1986,"In: T.M.Poston a R.Purdy (Eds.), Aquatic Toxicology a Environmental Fate, 9th Volume, ASTM STP 921, Philadelphia, PA:450-460",CCOP(=S)(OCC)OC1=NC(Cl)=C(Cl)C=C1Cl
2921-88-2,WB,28,Cyprinodon variegatus,FT,Cb/Cw,2.819543936,LogBCF (L/kg bdwt),SW,ArnotGobas,Effects of Diet Quantity on Sheepshead Minnows (Cyprinodon variegatus) During Early Life-Stage Exposures to Chlorpyrifos,"Cripe, G.M., D.J. Hansen, S.F. MaCauley, a J. Forester",1986,"In: T.M.Poston a R.Purdy (Eds.), Aquatic Toxicology a Environmental Fate, 9th Volume, ASTM STP 921, Philadelphia, PA:450-460",CCOP(=S)(OCC)OC1=NC(Cl)=C(Cl)C=C1Cl
2921-88-2,WB,28,Cyprinodon variegatus,FT,Cb/Cw,2.792391689,LogBCF (L/kg bdwt),SW,ArnotGobas,Effects of Diet Quantity on Sheepshead Minnows (Cyprinodon variegatus) During Early Life-Stage Exposures to Chlorpyrifos,"Cripe, G.M., D.J. Hansen, S.F. MaCauley, a J. Forester",1986,"In: T.M.Poston a R.Purdy (Eds.), Aquatic Toxicology a Environmental Fate, 9th Volume, ASTM STP 921, Philadelphia, PA:450-460",CCOP(=S)(OCC)OC1=NC(Cl)=C(Cl)C=C1Cl
2921-88-2,WB,28,Cyprinodon variegatus,FT,Cb/Cw,2.633468456,LogBCF (L/kg bdwt),SW,ArnotGobas,Effects of Diet Quantity on Sheepshead Minnows (Cyprinodon variegatus) During Early Life-Stage Exposures to Chlorpyrifos,"Cripe, G.M., D.J. Hansen, S.F. MaCauley, a J. Forester",1986,"In: T.M.Poston a R.Purdy (Eds.), Aquatic Toxicology a Environmental Fate, 9th Volume, ASTM STP 921, Philadelphia, PA:450-460",CCOP(=S)(OCC)OC1=NC(Cl)=C(Cl)C=C1Cl
2921-88-2,WB,28,Cyprinodon variegatus,FT,Cb/Cw,2.602059991,LogBCF (L/kg bdwt),SW,ArnotGobas,Effects of Diet Quantity on Sheepshead Minnows (Cyprinodon variegatus) During Early Life-Stage Exposures to Chlorpyrifos,"Cripe, G.M., D.J. Hansen, S.F. MaCauley, a J. Forester",1986,"In: T.M.Poston a R.Purdy (Eds.), Aquatic Toxicology a Environmental Fate, 9th Volume, ASTM STP 921, Philadelphia, PA:450-460",CCOP(=S)(OCC)OC1=NC(Cl)=C(Cl)C=C1Cl
2921-88-2,WB,28,Cyprinodon variegatus,FT,Cb/Cw,2.602059991,LogBCF (L/kg bdwt),SW,ArnotGobas,Effects of Diet Quantity on Sheepshead Minnows (Cyprinodon variegatus) During Early Life-Stage Exposures to Chlorpyrifos,"Cripe, G.M., D.J. Hansen, S.F. MaCauley, a J. Forester",1986,"In: T.M.Poston a R.Purdy (Eds.), Aquatic Toxicology a Environmental Fate, 9th Volume, ASTM STP 921, Philadelphia, PA:450-460",CCOP(=S)(OCC)OC1=NC(Cl)=C(Cl)C=C1Cl
2921-88-2,WB,28,Cyprinodon variegatus,FT,Cb/Cw,2.477121255,LogBCF (L/kg bdwt),SW,ArnotGobas,Effects of Diet Quantity on Sheepshead Minnows (Cyprinodon variegatus) During Early Life-Stage Exposures to Chlorpyrifos,"Cripe, G.M., D.J. Hansen, S.F. MaCauley, a J. Forester",1986,"In: T.M.Poston a R.Purdy (Eds.), Aquatic Toxicology a Environmental Fate, 9th Volume, ASTM STP 921, Philadelphia, PA:450-460",CCOP(=S)(OCC)OC1=NC(Cl)=C(Cl)C=C1Cl
2921-88-2,WB,28,Cyprinodon variegatus,FT,Cb/Cw,2.414973348,LogBCF (L/kg bdwt),SW,ArnotGobas,Effects of Diet Quantity on Sheepshead Minnows (Cyprinodon variegatus) During Early Life-Stage Exposures to Chlorpyrifos,"Cripe, G.M., D.J. Hansen, S.F. MaCauley, a J. Forester",1986,"In: T.M.Poston a R.Purdy (Eds.), Aquatic Toxicology a Environmental Fate, 9th Volume, ASTM STP 921, Philadelphia, PA:450-460",CCOP(=S)(OCC)OC1=NC(Cl)=C(Cl)C=C1Cl
2921-88-2,WB,28,Cyprinodon variegatus,FT,Cb/Cw,2.414973348,LogBCF (L/kg bdwt),SW,ArnotGobas,Effects of Diet Quantity on Sheepshead Minnows (Cyprinodon variegatus) During Early Life-Stage Exposures to Chlorpyrifos,"Cripe, G.M., D.J. Hansen, S.F. MaCauley, a J. Forester",1986,"In: T.M.Poston a R.Purdy (Eds.), Aquatic Toxicology a Environmental Fate, 9th Volume, ASTM STP 921, Philadelphia, PA:450-460",CCOP(=S)(OCC)OC1=NC(Cl)=C(Cl)C=C1Cl
2921-88-2,WB,28,Cyprinodon variegatus,FT,Cb/Cw,2.397940009,LogBCF (L/kg bdwt),SW,ArnotGobas,Effects of Diet Quantity on Sheepshead Minnows (Cyprinodon variegatus) During Early Life-Stage Exposures to Chlorpyrifos,"Cripe, G.M., D.J. Hansen, S.F. MaCauley, a J. Forester",1986,"In: T.M.Poston a R.Purdy (Eds.), Aquatic Toxicology a Environmental Fate, 9th Volume, ASTM STP 921, Philadelphia, PA:450-460",CCOP(=S)(OCC)OC1=NC(Cl)=C(Cl)C=C1Cl
2921-88-2,WB,28,Cyprinodon variegatus,FT,Cb/Cw,2.301029996,LogBCF (L/kg bdwt),SW,ArnotGobas,Effects of Diet Quantity on Sheepshead Minnows (Cyprinodon variegatus) During Early Life-Stage Exposures to Chlorpyrifos,"Cripe, G.M., D.J. Hansen, S.F. MaCauley, a J. Forester",1986,"In: T.M.Poston a R.Purdy (Eds.), Aquatic Toxicology a Environmental Fate, 9th Volume, ASTM STP 921, Philadelphia, PA:450-460",CCOP(=S)(OCC)OC1=NC(Cl)=C(Cl)C=C1Cl
2921-88-2,WB,28,Cyprinodon variegatus,FT,Cb/Cw,2.176091259,LogBCF (L/kg bdwt),SW,ArnotGobas,Effects of Diet Quantity on Sheepshead Minnows (Cyprinodon variegatus) During Early Life-Stage Exposures to Chlorpyrifos,"Cripe, G.M., D.J. Hansen, S.F. MaCauley, a J. Forester",1986,"In: T.M.Poston a R.Purdy (Eds.), Aquatic Toxicology a Environmental Fate, 9th Volume, ASTM STP 921, Philadelphia, PA:450-460",CCOP(=S)(OCC)OC1=NC(Cl)=C(Cl)C=C1Cl
2921-88-2,WB,28,Cyprinodon variegatus,FT,Cb/Cw,2.113943352,LogBCF (L/kg bdwt),SW,ArnotGobas,Effects of Diet Quantity on Sheepshead Minnows (Cyprinodon variegatus) During Early Life-Stage Exposures to Chlorpyrifos,"Cripe, G.M., D.J. Hansen, S.F. MaCauley, a J. Forester",1986,"In: T.M.Poston a R.Purdy (Eds.), Aquatic Toxicology a Environmental Fate, 9th Volume, ASTM STP 921, Philadelphia, PA:450-460",CCOP(=S)(OCC)OC1=NC(Cl)=C(Cl)C=C1Cl
2921-88-2,WB,28,Cyprinodon variegatus,FT,Cb/Cw,2.079181246,LogBCF (L/kg bdwt),SW,ArnotGobas,Effects of Diet Quantity on Sheepshead Minnows (Cyprinodon variegatus) During Early Life-Stage Exposures to Chlorpyrifos,"Cripe, G.M., D.J. Hansen, S.F. MaCauley, a J. Forester",1986,"In: T.M.Poston a R.Purdy (Eds.), Aquatic Toxicology a Environmental Fate, 9th Volume, ASTM STP 921, Philadelphia, PA:450-460",CCOP(=S)(OCC)OC1=NC(Cl)=C(Cl)C=C1Cl
2921-88-2,WB,28,Cyprinodon variegatus,FT,Cb/Cw,1.84509804,LogBCF (L/kg bdwt),SW,ArnotGobas,Effects of Diet Quantity on Sheepshead Minnows (Cyprinodon variegatus) During Early Life-Stage Exposures to Chlorpyrifos,"Cripe, G.M., D.J. Hansen, S.F. MaCauley, a J. Forester",1986,"In: T.M.Poston a R.Purdy (Eds.), Aquatic Toxicology a Environmental Fate, 9th Volume, ASTM STP 921, Philadelphia, PA:450-460",CCOP(=S)(OCC)OC1=NC(Cl)=C(Cl)C=C1Cl
2921-88-2,WB,28,Cyprinodon variegatus,FT,Cb/Cw,1.838849091,LogBCF (L/kg bdwt),SW,ArnotGobas,Effects of Diet Quantity on Sheepshead Minnows (Cyprinodon variegatus) During Early Life-Stage Exposures to Chlorpyrifos,"Cripe, G.M., D.J. Hansen, S.F. MaCauley, a J. Forester",1986,"In: T.M.Poston a R.Purdy (Eds.), Aquatic Toxicology a Environmental Fate, 9th Volume, ASTM STP 921, Philadelphia, PA:450-460",CCOP(=S)(OCC)OC1=NC(Cl)=C(Cl)C=C1Cl
2921-88-2,WB,28,Cyprinodon variegatus,FT,Cb/Cw,1.62324929,LogBCF (L/kg bdwt),SW,ArnotGobas,Effects of Diet Quantity on Sheepshead Minnows (Cyprinodon variegatus) During Early Life-Stage Exposures to Chlorpyrifos,"Cripe, G.M., D.J. Hansen, S.F. MaCauley, a J. Forester",1986,"In: T.M.Poston a R.Purdy (Eds.), Aquatic Toxicology a Environmental Fate, 9th Volume, ASTM STP 921, Philadelphia, PA:450-460",CCOP(=S)(OCC)OC1=NC(Cl)=C(Cl)C=C1Cl
2921-88-2,WB,7,Poecilia reticulata,FT,Cb/Cw,3.498310554,LogBCF (L/kg bdwt),FW,ArnotGobas,Uptake a Elimination of  Chlorpyrifos in the Guppy at Sublethal a Lethal Aqueous Concentrations.,"Deneer, J.W.",1993,Chemosphere 26(9):1607-1616,CCOP(=S)(OCC)OC1=NC(Cl)=C(Cl)C=C1Cl
2921-88-2,WB,6.44,Gasterosteus aculeatus,FT,Cb/Cw,3.176369119,LogBCF (L/kg bdwt),FW,ArnotGobas,Bioconcentration of Chlorpyrifos by the Three-Spined Stickleback Uer Laboratory a Field Coitions,"Deneer, J.W.",1994,Chemosphere 29(7):1561-1575,CCOP(=S)(OCC)OC1=NC(Cl)=C(Cl)C=C1Cl
2921-88-2,WB,14,Gasterosteus aculeatus,FT,Cb/Cw,3.134546834,LogBCF (L/kg bdwt),FW,ArnotGobas,Bioconcentration of Chlorpyrifos by the Three-Spined Stickleback Uer Laboratory a Field Coitions,"Deneer, J.W.",1994,Chemosphere 29(7):1561-1575,CCOP(=S)(OCC)OC1=NC(Cl)=C(Cl)C=C1Cl
2921-88-2,WB,7.01,Gasterosteus aculeatus,FT,Cb/Cw,3.117675565,LogBCF (L/kg bdwt),FW,ArnotGobas,Bioconcentration of Chlorpyrifos by the Three-Spined Stickleback Uer Laboratory a Field Coitions,"Deneer, J.W.",1994,Chemosphere 29(7):1561-1575,CCOP(=S)(OCC)OC1=NC(Cl)=C(Cl)C=C1Cl
2921-88-2,WB,5.26,Gasterosteus aculeatus,FT,Cb/Cw,3.061135691,LogBCF (L/kg bdwt),FW,ArnotGobas,Bioconcentration of Chlorpyrifos by the Three-Spined Stickleback Uer Laboratory a Field Coitions,"Deneer, J.W.",1994,Chemosphere 29(7):1561-1575,CCOP(=S)(OCC)OC1=NC(Cl)=C(Cl)C=C1Cl
2921-88-2,WB,21.33,Gasterosteus aculeatus,FT,Cb/Cw,3.043590174,LogBCF (L/kg bdwt),FW,ArnotGobas,Bioconcentration of Chlorpyrifos by the Three-Spined Stickleback Uer Laboratory a Field Coitions,"Deneer, J.W.",1994,Chemosphere 29(7):1561-1575,CCOP(=S)(OCC)OC1=NC(Cl)=C(Cl)C=C1Cl
2921-88-2,WB,20,Gasterosteus aculeatus,FT,Cb/Cw,3.040455968,LogBCF (L/kg bdwt),FW,ArnotGobas,Bioconcentration of Chlorpyrifos by the Three-Spined Stickleback Uer Laboratory a Field Coitions,"Deneer, J.W.",1994,Chemosphere 29(7):1561-1575,CCOP(=S)(OCC)OC1=NC(Cl)=C(Cl)C=C1Cl
2921-88-2,WB,16.3,Gasterosteus aculeatus,FT,Cb/Cw,3.005081798,LogBCF (L/kg bdwt),FW,ArnotGobas,Bioconcentration of Chlorpyrifos by the Three-Spined Stickleback Uer Laboratory a Field Coitions,"Deneer, J.W.",1994,Chemosphere 29(7):1561-1575,CCOP(=S)(OCC)OC1=NC(Cl)=C(Cl)C=C1Cl
2921-88-2,WB,7,Poecilia reticulata,FT,Cb/Cw,3.193958978,LogBCF (L/kg bdwt),FW,ArnotGobas,Uptake a Elimination of  Chlorpyrifos in the Guppy at Sublethal a Lethal Aqueous Concentrations.,"Deneer, J.W.",1993,Chemosphere 26(9):1607-1616,CCOP(=S)(OCC)OC1=NC(Cl)=C(Cl)C=C1Cl
2921-88-2,WB,7,Poecilia reticulata,FT,Cb/Cw,3.182699903,LogBCF (L/kg bdwt),FW,ArnotGobas,Uptake a Elimination of  Chlorpyrifos in the Guppy at Sublethal a Lethal Aqueous Concentrations.,"Deneer, J.W.",1993,Chemosphere 26(9):1607-1616,CCOP(=S)(OCC)OC1=NC(Cl)=C(Cl)C=C1Cl
2921-88-2,WB,9.21,Gasterosteus aculeatus,FT,Cb/Cw,2.976643384,LogBCF (L/kg bdwt),FW,ArnotGobas,Bioconcentration of Chlorpyrifos by the Three-Spined Stickleback Uer Laboratory a Field Coitions,"Deneer, J.W.",1994,Chemosphere 29(7):1561-1575,CCOP(=S)(OCC)OC1=NC(Cl)=C(Cl)C=C1Cl
2921-88-2,WB,11.3,Gasterosteus aculeatus,FT,Cb/Cw,2.931910237,LogBCF (L/kg bdwt),FW,ArnotGobas,Bioconcentration of Chlorpyrifos by the Three-Spined Stickleback Uer Laboratory a Field Coitions,"Deneer, J.W.",1994,Chemosphere 29(7):1561-1575,CCOP(=S)(OCC)OC1=NC(Cl)=C(Cl)C=C1Cl
2921-88-2,WB,20,Poecilia reticulata,FT,K1/K2,2.942008053,LogBCF (L/kg bdwt),FW,ArnotGobas,Uptake a Elimination of  Chlorpyrifos in the Guppy at Sublethal a Lethal Aqueous Concentrations.,"Deneer, J.W.",1993,Chemosphere 26(9):1607-1616,CCOP(=S)(OCC)OC1=NC(Cl)=C(Cl)C=C1Cl
2921-88-2,WB,7,Poecilia reticulata,FT,Cb/Cw,2.77815125,LogBCF (L/kg bdwt),FW,ArnotGobas,Uptake a Elimination of  Chlorpyrifos in the Guppy at Sublethal a Lethal Aqueous Concentrations.,"Deneer, J.W.",1993,Chemosphere 26(9):1607-1616,CCOP(=S)(OCC)OC1=NC(Cl)=C(Cl)C=C1Cl
2921-88-2,,28,Menidia peninsulae,FT,,2.763427994,LogBCF (L/kg bdwt),SW,ArnotGobas,Method for Early Life-Stage Toxicity Tests Using Three Atherinid Fishes a Results with Chlorpyrifos,"Goodman, L.R., D.J. Hansen, D.P. Middaugh, G.M. Cripe, a J.C. Moore",1985,"In: R.D.Cardwell, R.Purdy a R.C.Bahner (Eds.), Aquatic Toxicology a Hazard Assessment, 7th Symposium, ASTM STP 854, Philadelphia, PA:145-154",CCOP(=S)(OCC)OC1=NC(Cl)=C(Cl)C=C1Cl
2921-88-2,WB,28,Menidia beryllina,FT,,2.643452676,LogBCF (L/kg bdwt),SW,ArnotGobas,Method for Early Life-Stage Toxicity Tests Using Three Atherinid Fishes a Results with Chlorpyrifos,"Goodman, L.R., D.J. Hansen, D.P. Middaugh, G.M. Cripe, a J.C. Moore",1985,"In: R.D.Cardwell, R.Purdy a R.C.Bahner (Eds.), Aquatic Toxicology a Hazard Assessment, 7th Symposium, ASTM STP 854, Philadelphia, PA:145-154",CCOP(=S)(OCC)OC1=NC(Cl)=C(Cl)C=C1Cl
2921-88-2,,28,Menidia peninsulae,FT,,2.612783857,LogBCF (L/kg bdwt),SW,ArnotGobas,Method for Early Life-Stage Toxicity Tests Using Three Atherinid Fishes a Results with Chlorpyrifos,"Goodman, L.R., D.J. Hansen, D.P. Middaugh, G.M. Cripe, a J.C. Moore",1985,"In: R.D.Cardwell, R.Purdy a R.C.Bahner (Eds.), Aquatic Toxicology a Hazard Assessment, 7th Symposium, ASTM STP 854, Philadelphia, PA:145-154",CCOP(=S)(OCC)OC1=NC(Cl)=C(Cl)C=C1Cl
2921-88-2,,28,Menidia peninsulae,FT,,2.602059991,LogBCF (L/kg bdwt),SW,ArnotGobas,Method for Early Life-Stage Toxicity Tests Using Three Atherinid Fishes a Results with Chlorpyrifos,"Goodman, L.R., D.J. Hansen, D.P. Middaugh, G.M. Cripe, a J.C. Moore",1985,"In: R.D.Cardwell, R.Purdy a R.C.Bahner (Eds.), Aquatic Toxicology a Hazard Assessment, 7th Symposium, ASTM STP 854, Philadelphia, PA:145-154",CCOP(=S)(OCC)OC1=NC(Cl)=C(Cl)C=C1Cl
2921-88-2,WB,28,Menidia beryllina,FT,,2.301029996,LogBCF (L/kg bdwt),SW,ArnotGobas,Method for Early Life-Stage Toxicity Tests Using Three Atherinid Fishes a Results with Chlorpyrifos,"Goodman, L.R., D.J. Hansen, D.P. Middaugh, G.M. Cripe, a J.C. Moore",1985,"In: R.D.Cardwell, R.Purdy a R.C.Bahner (Eds.), Aquatic Toxicology a Hazard Assessment, 7th Symposium, ASTM STP 854, Philadelphia, PA:145-154",CCOP(=S)(OCC)OC1=NC(Cl)=C(Cl)C=C1Cl
2921-88-2,WB,28,Menidia beryllina,FT,,2.113943352,LogBCF (L/kg bdwt),SW,ArnotGobas,Method for Early Life-Stage Toxicity Tests Using Three Atherinid Fishes a Results with Chlorpyrifos,"Goodman, L.R., D.J. Hansen, D.P. Middaugh, G.M. Cripe, a J.C. Moore",1985,"In: R.D.Cardwell, R.Purdy a R.C.Bahner (Eds.), Aquatic Toxicology a Hazard Assessment, 7th Symposium, ASTM STP 854, Philadelphia, PA:145-154",CCOP(=S)(OCC)OC1=NC(Cl)=C(Cl)C=C1Cl
2921-88-2,WB,28,Menidia beryllina,FT,,2.021189299,LogBCF (L/kg bdwt),SW,ArnotGobas,Method for Early Life-Stage Toxicity Tests Using Three Atherinid Fishes a Results with Chlorpyrifos,"Goodman, L.R., D.J. Hansen, D.P. Middaugh, G.M. Cripe, a J.C. Moore",1985,"In: R.D.Cardwell, R.Purdy a R.C.Bahner (Eds.), Aquatic Toxicology a Hazard Assessment, 7th Symposium, ASTM STP 854, Philadelphia, PA:145-154",CCOP(=S)(OCC)OC1=NC(Cl)=C(Cl)C=C1Cl
2921-88-2,WB,35,Leuresthes tenuis,FT,Cb/Cw,3,LogBCF (L/kg bdwt),SW,ArnotGobas,A New Early Life-Stage Toxicity Test Using the California Grunion (Leuresthes tenuis) a Results with Chlorpyrifos,"Goodman, L.R., D.J. Hansen, G.M. Cripe, D.P. Middaugh, a J.C. Moore",1985,Ecotoxicol.Environ.Saf. 10(1):12-21,CCOP(=S)(OCC)OC1=NC(Cl)=C(Cl)C=C1Cl
2921-88-2,WB,35,Leuresthes tenuis,FT,Cb/Cw,2.84509804,LogBCF (L/kg bdwt),SW,ArnotGobas,A New Early Life-Stage Toxicity Test Using the California Grunion (Leuresthes tenuis) a Results with Chlorpyrifos,"Goodman, L.R., D.J. Hansen, G.M. Cripe, D.P. Middaugh, a J.C. Moore",1985,Ecotoxicol.Environ.Saf. 10(1):12-21,CCOP(=S)(OCC)OC1=NC(Cl)=C(Cl)C=C1Cl
2921-88-2,WB,35,Leuresthes tenuis,FT,Cb/Cw,2.792391689,LogBCF (L/kg bdwt),SW,ArnotGobas,A New Early Life-Stage Toxicity Test Using the California Grunion (Leuresthes tenuis) a Results with Chlorpyrifos,"Goodman, L.R., D.J. Hansen, G.M. Cripe, D.P. Middaugh, a J.C. Moore",1985,Ecotoxicol.Environ.Saf. 10(1):12-21,CCOP(=S)(OCC)OC1=NC(Cl)=C(Cl)C=C1Cl
2921-88-2,WB,26,Leuresthes tenuis,FT,Cb/Cw,2.653212514,LogBCF (L/kg bdwt),SW,ArnotGobas,A New Early Life-Stage Toxicity Test Using the California Grunion (Leuresthes tenuis) a Results with Chlorpyrifos,"Goodman, L.R., D.J. Hansen, G.M. Cripe, D.P. Middaugh, a J.C. Moore",1985,Ecotoxicol.Environ.Saf. 10(1):12-21,CCOP(=S)(OCC)OC1=NC(Cl)=C(Cl)C=C1Cl
2921-88-2,WB,26,Leuresthes tenuis,FT,Cb/Cw,1.819543936,LogBCF (L/kg bdwt),SW,ArnotGobas,A New Early Life-Stage Toxicity Test Using the California Grunion (Leuresthes tenuis) a Results with Chlorpyrifos,"Goodman, L.R., D.J. Hansen, G.M. Cripe, D.P. Middaugh, a J.C. Moore",1985,Ecotoxicol.Environ.Saf. 10(1):12-21,CCOP(=S)(OCC)OC1=NC(Cl)=C(Cl)C=C1Cl
2921-88-2,WB,26,Leuresthes tenuis,FT,Cb/Cw,1.763427994,LogBCF (L/kg bdwt),SW,ArnotGobas,A New Early Life-Stage Toxicity Test Using the California Grunion (Leuresthes tenuis) a Results with Chlorpyrifos,"Goodman, L.R., D.J. Hansen, G.M. Cripe, D.P. Middaugh, a J.C. Moore",1985,Ecotoxicol.Environ.Saf. 10(1):12-21,CCOP(=S)(OCC)OC1=NC(Cl)=C(Cl)C=C1Cl
2921-88-2,WB,49,Opsanus beta,FT,Cb/Cw,3.278753601,LogBCF (L/kg bdwt),SW,ArnotGobas,Early Life-Stage Toxicity Test Methods for Gulf Toadfish (Opsanus beta) a Results Using Chlorpyrifos.,"Hansen, D.J., L.R. Goodman, G.M. Cripe, a S.F. MaCauley",1986,Ecotox. Environ. Saf. 11(1):15-22,CCOP(=S)(OCC)OC1=NC(Cl)=C(Cl)C=C1Cl
2921-88-2,WB,49,Opsanus beta,FT,Cb/Cw,2.954242509,LogBCF (L/kg bdwt),SW,ArnotGobas,Early Life-Stage Toxicity Test Methods for Gulf Toadfish (Opsanus beta) a Results Using Chlorpyrifos.,"Hansen, D.J., L.R. Goodman, G.M. Cripe, a S.F. MaCauley",1986,Ecotox. Environ. Saf. 11(1):15-22,CCOP(=S)(OCC)OC1=NC(Cl)=C(Cl)C=C1Cl
2921-88-2,WB,49,Opsanus beta,FT,Cb/Cw,2.826074803,LogBCF (L/kg bdwt),SW,ArnotGobas,Early Life-Stage Toxicity Test Methods for Gulf Toadfish (Opsanus beta) a Results Using Chlorpyrifos.,"Hansen, D.J., L.R. Goodman, G.M. Cripe, a S.F. MaCauley",1986,Ecotox. Environ. Saf. 11(1):15-22,CCOP(=S)(OCC)OC1=NC(Cl)=C(Cl)C=C1Cl
2921-88-2,WB,49,Opsanus beta,FT,Cb/Cw,2.812913357,LogBCF (L/kg bdwt),SW,ArnotGobas,Early Life-Stage Toxicity Test Methods for Gulf Toadfish (Opsanus beta) a Results Using Chlorpyrifos.,"Hansen, D.J., L.R. Goodman, G.M. Cripe, a S.F. MaCauley",1986,Ecotox. Environ. Saf. 11(1):15-22,CCOP(=S)(OCC)OC1=NC(Cl)=C(Cl)C=C1Cl
2921-88-2,WB,49,Opsanus beta,FT,Cb/Cw,2.792391689,LogBCF (L/kg bdwt),SW,ArnotGobas,Early Life-Stage Toxicity Test Methods for Gulf Toadfish (Opsanus beta) a Results Using Chlorpyrifos.,"Hansen, D.J., L.R. Goodman, G.M. Cripe, a S.F. MaCauley",1986,Ecotox. Environ. Saf. 11(1):15-22,CCOP(=S)(OCC)OC1=NC(Cl)=C(Cl)C=C1Cl
2921-88-2,WB,49,Opsanus beta,FT,Cb/Cw,2.681241237,LogBCF (L/kg bdwt),SW,ArnotGobas,Early Life-Stage Toxicity Test Methods for Gulf Toadfish (Opsanus beta) a Results Using Chlorpyrifos.,"Hansen, D.J., L.R. Goodman, G.M. Cripe, a S.F. MaCauley",1986,Ecotox. Environ. Saf. 11(1):15-22,CCOP(=S)(OCC)OC1=NC(Cl)=C(Cl)C=C1Cl
2921-88-2,WB,49,Opsanus beta,FT,Cb/Cw,2.672097858,LogBCF (L/kg bdwt),SW,ArnotGobas,Early Life-Stage Toxicity Test Methods for Gulf Toadfish (Opsanus beta) a Results Using Chlorpyrifos.,"Hansen, D.J., L.R. Goodman, G.M. Cripe, a S.F. MaCauley",1986,Ecotox. Environ. Saf. 11(1):15-22,CCOP(=S)(OCC)OC1=NC(Cl)=C(Cl)C=C1Cl
2921-88-2,WB,49,Opsanus beta,FT,Cb/Cw,2.414973348,LogBCF (L/kg bdwt),SW,ArnotGobas,Early Life-Stage Toxicity Test Methods for Gulf Toadfish (Opsanus beta) a Results Using Chlorpyrifos.,"Hansen, D.J., L.R. Goodman, G.M. Cripe, a S.F. MaCauley",1986,Ecotox. Environ. Saf. 11(1):15-22,CCOP(=S)(OCC)OC1=NC(Cl)=C(Cl)C=C1Cl
2921-88-2,WB,49,Opsanus beta,FT,Cb/Cw,2.431363764,LogBCF (L/kg bdwt),SW,ArnotGobas,Early Life-Stage Toxicity Test Methods for Gulf Toadfish (Opsanus beta) a Results Using Chlorpyrifos.,"Hansen, D.J., L.R. Goodman, G.M. Cripe, a S.F. MaCauley",1986,Ecotox. Environ. Saf. 11(1):15-22,CCOP(=S)(OCC)OC1=NC(Cl)=C(Cl)C=C1Cl
2921-88-2,WB,49,Opsanus beta,FT,Cb/Cw,2,LogBCF (L/kg bdwt),SW,ArnotGobas,Early Life-Stage Toxicity Test Methods for Gulf Toadfish (Opsanus beta) a Results Using Chlorpyrifos.,"Hansen, D.J., L.R. Goodman, G.M. Cripe, a S.F. MaCauley",1986,Ecotox. Environ. Saf. 11(1):15-22,CCOP(=S)(OCC)OC1=NC(Cl)=C(Cl)C=C1Cl
2921-88-2,WB,60,Pimephales promelas,FT,,3.223495941,LogBCF (L/kg bdwt),FW,ArnotGobas,Chronic Toxicity of Dursban (Chlorpyrifos) to the Fathead Minnow (Pimephales promelas) a the Resultant Acetylcholinesterase Inhibition,"Jarvinen, A.W., B.R. Nordling, a M.E. Henry",1983,Ecotoxicol.Environ.Saf. 7(4):423-434,CCOP(=S)(OCC)OC1=NC(Cl)=C(Cl)C=C1Cl
2921-88-2,WB,56,Cyprinus carpio,FT,Cb/Cw,3.271027994,LogBCF (L/kg bdwt),,ArnotGobas,Biodegradation a Bioconcentration of Existing Chemical Substances uer the Chemical Substances Control Law,National Institute of Technology a Evaluation,2005,http://www.nite.go.jp/iex-e.html,CCOP(=S)(OCC)OC1=NC(Cl)=C(Cl)C=C1Cl
2921-88-2,WB,56,Cyprinus carpio,FT,Cb/Cw,2.432969291,LogBCF (L/kg bdwt),,ArnotGobas,Biodegradation a Bioconcentration of Existing Chemical Substances uer the Chemical Substances Control Law,National Institute of Technology a Evaluation,2005,http://www.nite.go.jp/iex-e.html,CCOP(=S)(OCC)OC1=NC(Cl)=C(Cl)C=C1Cl
2921-88-2,WB,5,Poecilia reticulata,FT,Cb/Cw,3.399154334,LogBCF (L/kg bdwt),FW,ArnotGobas,Relationships of Bioconcentration Factors of Organophosphate Pesticides Among Species of Fish,"Tsuda, T., M. Kojima, H. Harada, A. Nakajima, a S. Aoki",1997,Comp.Biochem.Physiol.C 116(3):213-218,CCOP(=S)(OCC)OC1=NC(Cl)=C(Cl)C=C1Cl
2921-88-2,WB,7,Poecilia reticulata,FT,Cb/Cw,3.36267093,LogBCF (L/kg bdwt),FW,ArnotGobas,Relationships of Bioconcentration Factors of Organophosphate Pesticides Among Species of Fish,"Tsuda, T., M. Kojima, H. Harada, A. Nakajima, a S. Aoki",1997,Comp.Biochem.Physiol.C 116(3):213-218,CCOP(=S)(OCC)OC1=NC(Cl)=C(Cl)C=C1Cl
2921-88-2,WB,7,Poecilia reticulata,FT,Cb/Cw,3.177824972,LogBCF (L/kg bdwt),FW,ArnotGobas,Relationships of Bioconcentration Factors of Organophosphate Pesticides Among Species of Fish,"Tsuda, T., M. Kojima, H. Harada, A. Nakajima, a S. Aoki",1997,Comp.Biochem.Physiol.C 116(3):213-218,CCOP(=S)(OCC)OC1=NC(Cl)=C(Cl)C=C1Cl
2921-88-2,WB,5,Poecilia reticulata,FT,Cb/Cw,3.1532049,LogBCF (L/kg bdwt),FW,ArnotGobas,Relationships of Bioconcentration Factors of Organophosphate Pesticides Among Species of Fish,"Tsuda, T., M. Kojima, H. Harada, A. Nakajima, a S. Aoki",1997,Comp.Biochem.Physiol.C 116(3):213-218,CCOP(=S)(OCC)OC1=NC(Cl)=C(Cl)C=C1Cl
2921-88-2,WB,7,Oryzias latipes,FT,Cb/Cw,3.202760687,LogBCF (L/kg bdwt),FW,ArnotGobas,Relationships of Bioconcentration Factors of Organophosphate Pesticides Among Species of Fish,"Tsuda, T., M. Kojima, H. Harada, A. Nakajima, a S. Aoki",1997,Comp.Biochem.Physiol.C 116(3):213-218,CCOP(=S)(OCC)OC1=NC(Cl)=C(Cl)C=C1Cl
2921-88-2,WB,5,Oryzias latipes,FT,Cb/Cw,3.183554534,LogBCF (L/kg bdwt),FW,ArnotGobas,Relationships of Bioconcentration Factors of Organophosphate Pesticides Among Species of Fish,"Tsuda, T., M. Kojima, H. Harada, A. Nakajima, a S. Aoki",1997,Comp.Biochem.Physiol.C 116(3):213-218,CCOP(=S)(OCC)OC1=NC(Cl)=C(Cl)C=C1Cl
2921-88-2,WB,5,Carassius auratus,FT,Cb/Cw,2.899820502,LogBCF (L/kg bdwt),FW,ArnotGobas,Relationships of Bioconcentration Factors of Organophosphate Pesticides Among Species of Fish,"Tsuda, T., M. Kojima, H. Harada, A. Nakajima, a S. Aoki",1997,Comp.Biochem.Physiol.C 116(3):213-218,CCOP(=S)(OCC)OC1=NC(Cl)=C(Cl)C=C1Cl
2921-88-2,WB,7,Carassius auratus,FT,Cb/Cw,2.864511081,LogBCF (L/kg bdwt),FW,ArnotGobas,Relationships of Bioconcentration Factors of Organophosphate Pesticides Among Species of Fish,"Tsuda, T., M. Kojima, H. Harada, A. Nakajima, a S. Aoki",1997,Comp.Biochem.Physiol.C 116(3):213-218,CCOP(=S)(OCC)OC1=NC(Cl)=C(Cl)C=C1Cl
2921-88-2,WB,3,Carassius auratus,FT,Cb/Cw,2.758911892,LogBCF (L/kg bdwt),FW,ArnotGobas,Relationships of Bioconcentration Factors of Organophosphate Pesticides Among Species of Fish,"Tsuda, T., M. Kojima, H. Harada, A. Nakajima, a S. Aoki",1997,Comp.Biochem.Physiol.C 116(3):213-218,CCOP(=S)(OCC)OC1=NC(Cl)=C(Cl)C=C1Cl
2921-88-2,WB,10,Cyprinus carpio,FT,Cb/Cw,2.740362689,LogBCF (L/kg bdwt),FW,ArnotGobas,Accumulation a Excretion of Pesticides Used in Golf-Courses by Carp (Cyprinus carpio) a Willow Shiner (Gnathopogon caerulescens).,"Tsuda, T., S. Aoki, M. Kojima, a T. Fujita",1992,Comp.Biochem.Physiol.C 101(1):63-66,CCOP(=S)(OCC)OC1=NC(Cl)=C(Cl)C=C1Cl
2921-88-2,WB,3,Cyprinus carpio,FT,Cb/Cw,2.73239376,LogBCF (L/kg bdwt),FW,ArnotGobas,Accumulation a Excretion of Pesticides Used in Golf-Courses by Carp (Cyprinus carpio) a Willow Shiner (Gnathopogon caerulescens).,"Tsuda, T., S. Aoki, M. Kojima, a T. Fujita",1992,Comp.Biochem.Physiol.C 101(1):63-66,CCOP(=S)(OCC)OC1=NC(Cl)=C(Cl)C=C1Cl
2921-88-2,WB,14,Cyprinus carpio,FT,Cb/Cw,2.612783857,LogBCF (L/kg bdwt),FW,ArnotGobas,Accumulation a Excretion of Pesticides Used in Golf-Courses by Carp (Cyprinus carpio) a Willow Shiner (Gnathopogon caerulescens).,"Tsuda, T., S. Aoki, M. Kojima, a T. Fujita",1992,Comp.Biochem.Physiol.C 101(1):63-66,CCOP(=S)(OCC)OC1=NC(Cl)=C(Cl)C=C1Cl
2921-88-2,WB,7,Cyprinus carpio,FT,Cb/Cw,2.531478917,LogBCF (L/kg bdwt),FW,ArnotGobas,Accumulation a Excretion of Pesticides Used in Golf-Courses by Carp (Cyprinus carpio) a Willow Shiner (Gnathopogon caerulescens).,"Tsuda, T., S. Aoki, M. Kojima, a T. Fujita",1992,Comp.Biochem.Physiol.C 101(1):63-66,CCOP(=S)(OCC)OC1=NC(Cl)=C(Cl)C=C1Cl
2921-88-2,WB,1,Cyprinus carpio,FT,Cb/Cw,2.491361694,LogBCF (L/kg bdwt),FW,ArnotGobas,Accumulation a Excretion of Pesticides Used in Golf-Courses by Carp (Cyprinus carpio) a Willow Shiner (Gnathopogon caerulescens).,"Tsuda, T., S. Aoki, M. Kojima, a T. Fujita",1992,Comp.Biochem.Physiol.C 101(1):63-66,CCOP(=S)(OCC)OC1=NC(Cl)=C(Cl)C=C1Cl
2921-88-2,WB,33,Pimephales promelas,,,2.653212514,LogBCF (L/kg bdwt),,ArnotGobas,Biological Effects of Continuous a Intermittent Dosing of Outdoor Experimental Streams with Chlorpyrifos,"Eaton, J., J. Arthur, R. Hermanutz, R. Kiefer, L. Mueller, R. Aerson, R. Erickson, a B.Nordling.. .",1985,"In: R.C.Bahner a D.J.Hansen (Eds.), Aquatic Toxicology a Hazard Assessment, 8th Symposium, ASTM STP 891, Philadelphia, PA:85-118",CCOP(=S)(OCC)OC1=NC(Cl)=C(Cl)C=C1Cl
2921-88-2,WB,33,Lepomis macrochirus,,,2,LogBCF (L/kg bdwt),,ArnotGobas,Biological Effects of Continuous a Intermittent Dosing of Outdoor Experimental Streams with Chlorpyrifos,"Eaton, J., J. Arthur, R. Hermanutz, R. Kiefer, L. Mueller, R. Aerson, R. Erickson, a B.Nordling.. .",1985,"In: R.C.Bahner a D.J.Hansen (Eds.), Aquatic Toxicology a Hazard Assessment, 8th Symposium, ASTM STP 891, Philadelphia, PA:85-118",CCOP(=S)(OCC)OC1=NC(Cl)=C(Cl)C=C1Cl
2921-88-2,WB,8,Poecilia reticulata,S,K1/K2,3.266466895,LogBCF (L/kg bdwt),FW,ArnotGobas,Bioconcentration Kinetics of the Organophosphorus Insecticide Chlorpyrifos in Guppies (Poecilia reticulata).,"Welling, W. a J.W. de Vries",1992,Ecotox.Environ.Saf. 23:64-75,CCOP(=S)(OCC)OC1=NC(Cl)=C(Cl)C=C1Cl
29253-36-9,WB,56,Cyprinus carpio,FT,Cb/Cw,3.210051857,LogBCF (L/kg bdwt),,ArnotGobas,Biodegradation a Bioconcentration of Existing Chemical Substances uer the Chemical Substances Control Law,Chemicals Evaluation a Research Institute,1992,http://qsar.cerij.or.jp/cgi-bin/DEGACC/iex.cgie,CC(C)C1=CC=CC2=CC=CC=C12
29253-36-9,WB,56,Cyprinus carpio,FT,Cb/Cw,2.776706044,LogBCF (L/kg bdwt),,ArnotGobas,Biodegradation a Bioconcentration of Existing Chemical Substances uer the Chemical Substances Control Law,Chemicals Evaluation a Research Institute,1992,http://qsar.cerij.or.jp/cgi-bin/DEGACC/iex.cgie,CC(C)C1=CC=CC2=CC=CC=C12
294-62-2,WB,70,Cyprinus carpio,FT,Cb/Cw,3.908485019,LogBCF (L/kg bdwt),,ArnotGobas,Biodegradation a Bioconcentration of Existing Chemical Substances uer the Chemical Substances Control Law,National Institute of Technology a Evaluation,2005,http://www.nite.go.jp/iex-e.html,C1CCCCCCCCCCC1
294-62-2,WB,70,Cyprinus carpio,FT,Cb/Cw,3.785329835,LogBCF (L/kg bdwt),,ArnotGobas,Biodegradation a Bioconcentration of Existing Chemical Substances uer the Chemical Substances Control Law,National Institute of Technology a Evaluation,2005,http://www.nite.go.jp/iex-e.html,C1CCCCCCCCCCC1
298-00-0,WB,7.01,Poecilia reticulata,FT,Cb/Cw,1.926301279,LogBCF (L/kg bdwt),FW,ArnotGobas,Uptake a Elimination Kinetics of Organophosphorous Pesticides in the Guppy (Poecilia reticulata): Correlations with the Octanol/Water Partition,"De Bruijn, J., a J. Hermens",1991,Environ.Toxicol.Chem. 10(6):791-804,COP(=S)(OC)OC1=CC=C(C=C1)[N+]([O-])=O
298-04-4,WB,5,Poecilia reticulata,FT,Cb/Cw,2.691965103,LogBCF (L/kg bdwt),FW,ArnotGobas,Relationships of Bioconcentration Factors of Organophosphate Pesticides Among Species of Fish,"Tsuda, T., M. Kojima, H. Harada, A. Nakajima, a S. Aoki",1997,Comp.Biochem.Physiol.C 116(3):213-218,CCOP(=S)(OCC)SCCSCC
298-04-4,WB,7.01,Poecilia reticulata,FT,Cb/Cw,2.673941999,LogBCF (L/kg bdwt),FW,ArnotGobas,Relationships of Bioconcentration Factors of Organophosphate Pesticides Among Species of Fish,"Tsuda, T., M. Kojima, H. Harada, A. Nakajima, a S. Aoki",1997,Comp.Biochem.Physiol.C 116(3):213-218,CCOP(=S)(OCC)SCCSCC
298-04-4,WB,5,Poecilia reticulata,FT,Cb/Cw,2.526339277,LogBCF (L/kg bdwt),FW,ArnotGobas,Relationships of Bioconcentration Factors of Organophosphate Pesticides Among Species of Fish,"Tsuda, T., M. Kojima, H. Harada, A. Nakajima, a S. Aoki",1997,Comp.Biochem.Physiol.C 116(3):213-218,CCOP(=S)(OCC)SCCSCC
298-04-4,WB,7.01,Oryzias latipes,FT,Cb/Cw,2.320146286,LogBCF (L/kg bdwt),FW,ArnotGobas,Relationships of Bioconcentration Factors of Organophosphate Pesticides Among Species of Fish,"Tsuda, T., M. Kojima, H. Harada, A. Nakajima, a S. Aoki",1997,Comp.Biochem.Physiol.C 116(3):213-218,CCOP(=S)(OCC)SCCSCC
298-04-4,WB,3,Poecilia reticulata,FT,Cb/Cw,2.409933123,LogBCF (L/kg bdwt),FW,ArnotGobas,Relationships of Bioconcentration Factors of Organophosphate Pesticides Among Species of Fish,"Tsuda, T., M. Kojima, H. Harada, A. Nakajima, a S. Aoki",1997,Comp.Biochem.Physiol.C 116(3):213-218,CCOP(=S)(OCC)SCCSCC
298-04-4,WB,5,Oryzias latipes,FT,Cb/Cw,2.305351369,LogBCF (L/kg bdwt),FW,ArnotGobas,Relationships of Bioconcentration Factors of Organophosphate Pesticides Among Species of Fish,"Tsuda, T., M. Kojima, H. Harada, A. Nakajima, a S. Aoki",1997,Comp.Biochem.Physiol.C 116(3):213-218,CCOP(=S)(OCC)SCCSCC
298-04-4,WB,3,Oryzias latipes,FT,Cb/Cw,2.292256071,LogBCF (L/kg bdwt),FW,ArnotGobas,Relationships of Bioconcentration Factors of Organophosphate Pesticides Among Species of Fish,"Tsuda, T., M. Kojima, H. Harada, A. Nakajima, a S. Aoki",1997,Comp.Biochem.Physiol.C 116(3):213-218,CCOP(=S)(OCC)SCCSCC
298-04-4,WB,3,Poecilia reticulata,FT,Cb/Cw,2.408239965,LogBCF (L/kg bdwt),FW,ArnotGobas,Relationships of Bioconcentration Factors of Organophosphate Pesticides Among Species of Fish,"Tsuda, T., M. Kojima, H. Harada, A. Nakajima, a S. Aoki",1997,Comp.Biochem.Physiol.C 116(3):213-218,CCOP(=S)(OCC)SCCSCC
298-04-4,WB,7.01,Poecilia reticulata,FT,Cb/Cw,2.283301229,LogBCF (L/kg bdwt),FW,ArnotGobas,Relationships of Bioconcentration Factors of Organophosphate Pesticides Among Species of Fish,"Tsuda, T., M. Kojima, H. Harada, A. Nakajima, a S. Aoki",1997,Comp.Biochem.Physiol.C 116(3):213-218,CCOP(=S)(OCC)SCCSCC
298-04-4,WB,5,Carassius auratus,FT,Cb/Cw,2.08278537,LogBCF (L/kg bdwt),FW,ArnotGobas,Relationships of Bioconcentration Factors of Organophosphate Pesticides Among Species of Fish,"Tsuda, T., M. Kojima, H. Harada, A. Nakajima, a S. Aoki",1997,Comp.Biochem.Physiol.C 116(3):213-218,CCOP(=S)(OCC)SCCSCC
298-04-4,WB,1,Oryzias latipes,FT,Cb/Cw,2.152288344,LogBCF (L/kg bdwt),FW,ArnotGobas,Relationships of Bioconcentration Factors of Organophosphate Pesticides Among Species of Fish,"Tsuda, T., M. Kojima, H. Harada, A. Nakajima, a S. Aoki",1997,Comp.Biochem.Physiol.C 116(3):213-218,CCOP(=S)(OCC)SCCSCC
298-04-4,WB,0.5,Oryzias latipes,FT,Cb/Cw,2.146128036,LogBCF (L/kg bdwt),FW,ArnotGobas,Relationships of Bioconcentration Factors of Organophosphate Pesticides Among Species of Fish,"Tsuda, T., M. Kojima, H. Harada, A. Nakajima, a S. Aoki",1997,Comp.Biochem.Physiol.C 116(3):213-218,CCOP(=S)(OCC)SCCSCC
298-04-4,WB,0.5,Carassius auratus,FT,Cb/Cw,2.037426498,LogBCF (L/kg bdwt),FW,ArnotGobas,Relationships of Bioconcentration Factors of Organophosphate Pesticides Among Species of Fish,"Tsuda, T., M. Kojima, H. Harada, A. Nakajima, a S. Aoki",1997,Comp.Biochem.Physiol.C 116(3):213-218,CCOP(=S)(OCC)SCCSCC
298-04-4,WB,3,Carassius auratus,FT,Cb/Cw,2.004321374,LogBCF (L/kg bdwt),FW,ArnotGobas,Relationships of Bioconcentration Factors of Organophosphate Pesticides Among Species of Fish,"Tsuda, T., M. Kojima, H. Harada, A. Nakajima, a S. Aoki",1997,Comp.Biochem.Physiol.C 116(3):213-218,CCOP(=S)(OCC)SCCSCC
298-04-4,WB,1,Poecilia reticulata,FT,Cb/Cw,2.136720567,LogBCF (L/kg bdwt),FW,ArnotGobas,Relationships of Bioconcentration Factors of Organophosphate Pesticides Among Species of Fish,"Tsuda, T., M. Kojima, H. Harada, A. Nakajima, a S. Aoki",1997,Comp.Biochem.Physiol.C 116(3):213-218,CCOP(=S)(OCC)SCCSCC
298-04-4,WB,1,Poecilia reticulata,FT,Cb/Cw,2.120573931,LogBCF (L/kg bdwt),FW,ArnotGobas,Relationships of Bioconcentration Factors of Organophosphate Pesticides Among Species of Fish,"Tsuda, T., M. Kojima, H. Harada, A. Nakajima, a S. Aoki",1997,Comp.Biochem.Physiol.C 116(3):213-218,CCOP(=S)(OCC)SCCSCC
298-04-4,WB,1,Tanichthys albonubes,FT,Cb/Cw,2.113943352,LogBCF (L/kg bdwt),FW,ArnotGobas,Relationships of Bioconcentration Factors of Organophosphate Pesticides Among Species of Fish,"Tsuda, T., M. Kojima, H. Harada, A. Nakajima, a S. Aoki",1997,Comp.Biochem.Physiol.C 116(3):213-218,CCOP(=S)(OCC)SCCSCC
298-04-4,WB,3,Tanichthys albonubes,FT,Cb/Cw,2.093421685,LogBCF (L/kg bdwt),FW,ArnotGobas,Relationships of Bioconcentration Factors of Organophosphate Pesticides Among Species of Fish,"Tsuda, T., M. Kojima, H. Harada, A. Nakajima, a S. Aoki",1997,Comp.Biochem.Physiol.C 116(3):213-218,CCOP(=S)(OCC)SCCSCC
298-04-4,WB,7.01,Carassius auratus,FT,Cb/Cw,1.891537458,LogBCF (L/kg bdwt),FW,ArnotGobas,Relationships of Bioconcentration Factors of Organophosphate Pesticides Among Species of Fish,"Tsuda, T., M. Kojima, H. Harada, A. Nakajima, a S. Aoki",1997,Comp.Biochem.Physiol.C 116(3):213-218,CCOP(=S)(OCC)SCCSCC
298-04-4,WB,1,Carassius auratus,FT,Cb/Cw,1.877371346,LogBCF (L/kg bdwt),FW,ArnotGobas,Relationships of Bioconcentration Factors of Organophosphate Pesticides Among Species of Fish,"Tsuda, T., M. Kojima, H. Harada, A. Nakajima, a S. Aoki",1997,Comp.Biochem.Physiol.C 116(3):213-218,CCOP(=S)(OCC)SCCSCC
298-04-4,WB,0.25,Oryzias latipes,FT,Cb/Cw,1.51851394,LogBCF (L/kg bdwt),FW,ArnotGobas,Relationships of Bioconcentration Factors of Organophosphate Pesticides Among Species of Fish,"Tsuda, T., M. Kojima, H. Harada, A. Nakajima, a S. Aoki",1997,Comp.Biochem.Physiol.C 116(3):213-218,CCOP(=S)(OCC)SCCSCC
298-04-4,WB,0.5,Tanichthys albonubes,FT,Cb/Cw,1.620136055,LogBCF (L/kg bdwt),FW,ArnotGobas,Relationships of Bioconcentration Factors of Organophosphate Pesticides Among Species of Fish,"Tsuda, T., M. Kojima, H. Harada, A. Nakajima, a S. Aoki",1997,Comp.Biochem.Physiol.C 116(3):213-218,CCOP(=S)(OCC)SCCSCC
298-04-4,WB,0.25,Tanichthys albonubes,FT,Cb/Cw,1.413299764,LogBCF (L/kg bdwt),FW,ArnotGobas,Relationships of Bioconcentration Factors of Organophosphate Pesticides Among Species of Fish,"Tsuda, T., M. Kojima, H. Harada, A. Nakajima, a S. Aoki",1997,Comp.Biochem.Physiol.C 116(3):213-218,CCOP(=S)(OCC)SCCSCC
298-06-6,WB,42,Cyprinus carpio,FT,Cb/Cw,0.7,LogBCF (L/kg bdwt),,ArnotGobas,Biodegradation a Bioconcentration of Existing Chemical Substances uer the Chemical Substances Control Law,Chemicals Evaluation a Research Institute,1992,http://qsar.cerij.or.jp/cgi-bin/DEGACC/iex.cgie,CCOP(S)(=S)OCC
298-06-6,WB,42,Cyprinus carpio,FT,Cb/Cw,-0.3,LogBCF (L/kg bdwt),,ArnotGobas,Biodegradation a Bioconcentration of Existing Chemical Substances uer the Chemical Substances Control Law,Chemicals Evaluation a Research Institute,1992,http://qsar.cerij.or.jp/cgi-bin/DEGACC/iex.cgie,CCOP(S)(=S)OCC
299-84-3,WB,7.01,Poecilia reticulata,FT,Cb/Cw,3.58446692,LogBCF (L/kg bdwt),FW,ArnotGobas,Uptake a Elimination Kinetics of Organophosphorous Pesticides in the Guppy (Poecilia reticulata): Correlations with the Octanol/Water Partition,"De Bruijn, J., a J. Hermens",1991,Environ.Toxicol.Chem. 10(6):791-804,COP(=S)(OC)OC1=CC(Cl)=C(Cl)C=C1Cl
306-52-5,WB,5,Oryzias latipes,FT,Cb/Cw,0.041392685,LogBCF (L/kg bdwt),FW,ArnotGobas,Bioconcentration a Excretion of Phosphoric Acid Triesters by Killifish (Oryzias latipes),"Sasaki, K., T. Suzuki, M. Takeda, a M. Uchiyama",1982,Bull.Environ.Contam.Toxicol. 28:752-759,OP(O)(=O)OCC(Cl)(Cl)Cl
306-52-5,WB,11,Oryzias latipes,FT,Cb/Cw,0.113943352,LogBCF (L/kg bdwt),FW,ArnotGobas,Bioconcentration a Excretion of Phosphoric Acid Triesters by Killifish (Oryzias latipes),"Sasaki, K., T. Suzuki, M. Takeda, a M. Uchiyama",1982,Bull.Environ.Contam.Toxicol. 28:752-759,OP(O)(=O)OCC(Cl)(Cl)Cl
309-00-2,WB,70,Cyprinus carpio,FT,Cb/Cw,4.069853021,LogBCF (L/kg bdwt),,ArnotGobas,Biodegradation a Bioconcentration of Existing Chemical Substances uer the Chemical Substances Control Law,National Institute of Technology a Evaluation,2005,http://www.nite.go.jp/iex-e.html,ClC1=C(Cl)C2(Cl)C3C4CC(C=C4)C3C1(Cl)C2(Cl)Cl
309-00-2,WB,70,Cyprinus carpio,FT,Cb/Cw,3.740362689,LogBCF (L/kg bdwt),,ArnotGobas,Biodegradation a Bioconcentration of Existing Chemical Substances uer the Chemical Substances Control Law,National Institute of Technology a Evaluation,2005,http://www.nite.go.jp/iex-e.html,ClC1=C(Cl)C2(Cl)C3C4CC(C=C4)C3C1(Cl)C2(Cl)Cl
314-40-9,WB,17,Pimephales promelas,FT,Cb/Cw,0.505149978,LogBCF (L/kg bdwt),FW,ArnotGobas,"Bromacil a Diuron Herbicides: Toxicity, Uptake, a Elimination in Freshwater Fish","Call, D.J., L.T. Brooke, R.J. Kent, M.L. Knuth, S.H. Poirier, J.M. Huot, a A.R. Lima",1987,Arch.Environ.Contam.Toxicol. 16(5):607-613,CCC(C)N1C(=O)NC(C)=C(Br)C1=O
319-84-6,,2.06415,Poecilia reticulata,R,Cb/Cw,2.397940009,LogBCF (L/kg bdwt),FW,ArnotGobas,"Toxicity, Accumulation a Elimination Studies of alpha-Hexachlorocyclohexane (alpha-HCH) with Freshwater Organisms of Different Trophic Levels","Canton, J.H., P.A. Greve, W. Slooff, a G.J. Van Esch",1975,Water Res. 9(12):1163-1169,ClC1C(Cl)C(Cl)C(Cl)C(Cl)C1Cl
319-84-6,,2.06415,Poecilia reticulata,R,Cb/Cw,2.146128036,LogBCF (L/kg bdwt),FW,ArnotGobas,"Toxicity, Accumulation a Elimination Studies of alpha-Hexachlorocyclohexane (alpha-HCH) with Freshwater Organisms of Different Trophic Levels","Canton, J.H., P.A. Greve, W. Slooff, a G.J. Van Esch",1975,Water Res. 9(12):1163-1169,ClC1C(Cl)C(Cl)C(Cl)C(Cl)C1Cl
319-84-6,,2.06415,Poecilia reticulata,R,Cb/Cw,2.146128036,LogBCF (L/kg bdwt),FW,ArnotGobas,"Toxicity, Accumulation a Elimination Studies of alpha-Hexachlorocyclohexane (alpha-HCH) with Freshwater Organisms of Different Trophic Levels","Canton, J.H., P.A. Greve, W. Slooff, a G.J. Van Esch",1975,Water Res. 9(12):1163-1169,ClC1C(Cl)C(Cl)C(Cl)C(Cl)C1Cl
319-84-6,WB,21,Oncorhynchus mykiss,FT,Cb/Cw,3.113943352,LogBCF (L/kg bdwt),FW,ArnotGobas,Bioconcentration Factors of Some Halogenated Organics for Rainbow Trout: Limitations in Their Use for Prediction of Environmental Residues,"Oliver, B.G., a A.J. Niimi",1985,Environ.Sci.Technol. 19(9):842-849,ClC1C(Cl)C(Cl)C(Cl)C(Cl)C1Cl
319-84-6,WB,21,Oncorhynchus mykiss,FT,Cb/Cw,3.447158031,LogBCF (L/kg bdwt),FW,ArnotGobas,Bioconcentration Factors of Some Halogenated Organics for Rainbow Trout: Limitations in Their Use for Prediction of Environmental Residues,"Oliver, B.G., a A.J. Niimi",1985,Environ.Sci.Technol. 19(9):842-849,ClC1C(Cl)C(Cl)C(Cl)C(Cl)C1Cl
319-84-6,WB,7,Oncorhynchus mykiss,FT,Cb/Cw,2.973127854,LogBCF (L/kg bdwt),FW,ArnotGobas,Bioconcentration Factors of Some Halogenated Organics for Rainbow Trout: Limitations in Their Use for Prediction of Environmental Residues,"Oliver, B.G., a A.J. Niimi",1985,Environ.Sci.Technol. 19(9):842-849,ClC1C(Cl)C(Cl)C(Cl)C(Cl)C1Cl
319-84-6,WB,50,Oncorhynchus mykiss,FT,Cb/Cw,3.255272505,LogBCF (L/kg bdwt),FW,ArnotGobas,Bioconcentration Factors of Some Halogenated Organics for Rainbow Trout: Limitations in Their Use for Prediction of Environmental Residues,"Oliver, B.G., a A.J. Niimi",1985,Environ.Sci.Technol. 19(9):842-849,ClC1C(Cl)C(Cl)C(Cl)C(Cl)C1Cl
319-84-6,WB,75,Oncorhynchus mykiss,FT,Cb/Cw,3.301029996,LogBCF (L/kg bdwt),FW,ArnotGobas,Bioconcentration Factors of Some Halogenated Organics for Rainbow Trout: Limitations in Their Use for Prediction of Environmental Residues,"Oliver, B.G., a A.J. Niimi",1985,Environ.Sci.Technol. 19(9):842-849,ClC1C(Cl)C(Cl)C(Cl)C(Cl)C1Cl
319-84-6,WB,35,Oncorhynchus mykiss,FT,Cb/Cw,3.380211242,LogBCF (L/kg bdwt),FW,ArnotGobas,Bioconcentration Factors of Some Halogenated Organics for Rainbow Trout: Limitations in Their Use for Prediction of Environmental Residues,"Oliver, B.G., a A.J. Niimi",1985,Environ.Sci.Technol. 19(9):842-849,ClC1C(Cl)C(Cl)C(Cl)C(Cl)C1Cl
319-84-6,WB,50,Oncorhynchus mykiss,FT,Cb/Cw,3.361727836,LogBCF (L/kg bdwt),FW,ArnotGobas,Bioconcentration Factors of Some Halogenated Organics for Rainbow Trout: Limitations in Their Use for Prediction of Environmental Residues,"Oliver, B.G., a A.J. Niimi",1985,Environ.Sci.Technol. 19(9):842-849,ClC1C(Cl)C(Cl)C(Cl)C(Cl)C1Cl
319-84-6,WB,96,Oncorhynchus mykiss,FT,Cb/Cw,3.431363764,LogBCF (L/kg bdwt),FW,ArnotGobas,Bioconcentration Factors of Some Halogenated Organics for Rainbow Trout: Limitations in Their Use for Prediction of Environmental Residues,"Oliver, B.G., a A.J. Niimi",1985,Environ.Sci.Technol. 19(9):842-849,ClC1C(Cl)C(Cl)C(Cl)C(Cl)C1Cl
319-84-6,WB,35,Oncorhynchus mykiss,FT,Cb/Cw,3.322219295,LogBCF (L/kg bdwt),FW,ArnotGobas,Bioconcentration Factors of Some Halogenated Organics for Rainbow Trout: Limitations in Their Use for Prediction of Environmental Residues,"Oliver, B.G., a A.J. Niimi",1985,Environ.Sci.Technol. 19(9):842-849,ClC1C(Cl)C(Cl)C(Cl)C(Cl)C1Cl
319-84-6,WB,96,Oncorhynchus mykiss,FT,Cb/Cw,3.204119983,LogBCF (L/kg bdwt),FW,ArnotGobas,Bioconcentration Factors of Some Halogenated Organics for Rainbow Trout: Limitations in Their Use for Prediction of Environmental Residues,"Oliver, B.G., a A.J. Niimi",1985,Environ.Sci.Technol. 19(9):842-849,ClC1C(Cl)C(Cl)C(Cl)C(Cl)C1Cl
319-84-6,WB,7,Oncorhynchus mykiss,FT,Cb/Cw,2.973127854,LogBCF (L/kg bdwt),FW,ArnotGobas,Bioconcentration Factors of Some Halogenated Organics for Rainbow Trout: Limitations in Their Use for Prediction of Environmental Residues,"Oliver, B.G., a A.J. Niimi",1985,Environ.Sci.Technol. 19(9):842-849,ClC1C(Cl)C(Cl)C(Cl)C(Cl)C1Cl
319-84-6,WB,75,Oncorhynchus mykiss,FT,Cb/Cw,3.041392685,LogBCF (L/kg bdwt),FW,ArnotGobas,Bioconcentration Factors of Some Halogenated Organics for Rainbow Trout: Limitations in Their Use for Prediction of Environmental Residues,"Oliver, B.G., a A.J. Niimi",1985,Environ.Sci.Technol. 19(9):842-849,ClC1C(Cl)C(Cl)C(Cl)C(Cl)C1Cl
319-84-6,WB,3,Oncorhynchus mykiss,FT,BIOFAC,2.326335861,LogBCF (L/kg bdwt),FW,ArnotGobas,Factors Affecting the Bioconcentration of Hexachlorocyclohexanes in Early Life Stages of Oncorhynchus mykiss,"Vigano, L., S. Galassi, a M. Gatto",1992,Environ.Toxicol.Chem. 11(4):535-540,ClC1C(Cl)C(Cl)C(Cl)C(Cl)C1Cl
319-84-6,WB,3,Oncorhynchus mykiss,FT,BIOFAC,2.46686762,LogBCF (L/kg bdwt),FW,ArnotGobas,Factors Affecting the Bioconcentration of Hexachlorocyclohexanes in Early Life Stages of Oncorhynchus mykiss,"Vigano, L., S. Galassi, a M. Gatto",1992,Environ.Toxicol.Chem. 11(4):535-540,ClC1C(Cl)C(Cl)C(Cl)C(Cl)C1Cl
319-84-6,WB,3,Oncorhynchus mykiss,FT,BIOFAC,2.447158031,LogBCF (L/kg bdwt),FW,ArnotGobas,Factors Affecting the Bioconcentration of Hexachlorocyclohexanes in Early Life Stages of Oncorhynchus mykiss,"Vigano, L., S. Galassi, a M. Gatto",1992,Environ.Toxicol.Chem. 11(4):535-540,ClC1C(Cl)C(Cl)C(Cl)C(Cl)C1Cl
320-60-5,WB,21,Oncorhynchus mykiss,FT,Cb/Cw,3.69019608,LogBCF (L/kg bdwt),FW,ArnotGobas,Bioconcentration Factors of Some Halogenated Organics for Rainbow Trout: Limitations in Their Use for Prediction of Environmental Residues,"Oliver, B.G., a A.J. Niimi",1985,Environ.Sci.Technol. 19(9):842-849,FC(F)(F)C1=CC=C(Cl)C=C1Cl
320-60-5,WB,21,Oncorhynchus mykiss,FT,Cb/Cw,3.322219295,LogBCF (L/kg bdwt),FW,ArnotGobas,Bioconcentration Factors of Some Halogenated Organics for Rainbow Trout: Limitations in Their Use for Prediction of Environmental Residues,"Oliver, B.G., a A.J. Niimi",1985,Environ.Sci.Technol. 19(9):842-849,FC(F)(F)C1=CC=C(Cl)C=C1Cl
320-60-5,WB,50,Oncorhynchus mykiss,FT,Cb/Cw,3.51851394,LogBCF (L/kg bdwt),FW,ArnotGobas,Bioconcentration Factors of Some Halogenated Organics for Rainbow Trout: Limitations in Their Use for Prediction of Environmental Residues,"Oliver, B.G., a A.J. Niimi",1985,Environ.Sci.Technol. 19(9):842-849,FC(F)(F)C1=CC=C(Cl)C=C1Cl
320-60-5,WB,75,Oncorhynchus mykiss,FT,Cb/Cw,3.505149978,LogBCF (L/kg bdwt),FW,ArnotGobas,Bioconcentration Factors of Some Halogenated Organics for Rainbow Trout: Limitations in Their Use for Prediction of Environmental Residues,"Oliver, B.G., a A.J. Niimi",1985,Environ.Sci.Technol. 19(9):842-849,FC(F)(F)C1=CC=C(Cl)C=C1Cl
320-60-5,WB,50,Oncorhynchus mykiss,FT,Cb/Cw,3.556302501,LogBCF (L/kg bdwt),FW,ArnotGobas,Bioconcentration Factors of Some Halogenated Organics for Rainbow Trout: Limitations in Their Use for Prediction of Environmental Residues,"Oliver, B.G., a A.J. Niimi",1985,Environ.Sci.Technol. 19(9):842-849,FC(F)(F)C1=CC=C(Cl)C=C1Cl
320-60-5,WB,35,Oncorhynchus mykiss,FT,Cb/Cw,3.556302501,LogBCF (L/kg bdwt),FW,ArnotGobas,Bioconcentration Factors of Some Halogenated Organics for Rainbow Trout: Limitations in Their Use for Prediction of Environmental Residues,"Oliver, B.G., a A.J. Niimi",1985,Environ.Sci.Technol. 19(9):842-849,FC(F)(F)C1=CC=C(Cl)C=C1Cl
320-60-5,WB,35,Oncorhynchus mykiss,FT,Cb/Cw,3.643452676,LogBCF (L/kg bdwt),FW,ArnotGobas,Bioconcentration Factors of Some Halogenated Organics for Rainbow Trout: Limitations in Their Use for Prediction of Environmental Residues,"Oliver, B.G., a A.J. Niimi",1985,Environ.Sci.Technol. 19(9):842-849,FC(F)(F)C1=CC=C(Cl)C=C1Cl
320-60-5,WB,96,Oncorhynchus mykiss,FT,Cb/Cw,3.544068044,LogBCF (L/kg bdwt),FW,ArnotGobas,Bioconcentration Factors of Some Halogenated Organics for Rainbow Trout: Limitations in Their Use for Prediction of Environmental Residues,"Oliver, B.G., a A.J. Niimi",1985,Environ.Sci.Technol. 19(9):842-849,FC(F)(F)C1=CC=C(Cl)C=C1Cl
320-60-5,WB,96,Oncorhynchus mykiss,FT,Cb/Cw,3.380211242,LogBCF (L/kg bdwt),FW,ArnotGobas,Bioconcentration Factors of Some Halogenated Organics for Rainbow Trout: Limitations in Their Use for Prediction of Environmental Residues,"Oliver, B.G., a A.J. Niimi",1985,Environ.Sci.Technol. 19(9):842-849,FC(F)(F)C1=CC=C(Cl)C=C1Cl
320-60-5,WB,75,Oncorhynchus mykiss,FT,Cb/Cw,3.079181246,LogBCF (L/kg bdwt),FW,ArnotGobas,Bioconcentration Factors of Some Halogenated Organics for Rainbow Trout: Limitations in Their Use for Prediction of Environmental Residues,"Oliver, B.G., a A.J. Niimi",1985,Environ.Sci.Technol. 19(9):842-849,FC(F)(F)C1=CC=C(Cl)C=C1Cl
3209-22-1,WB,5,Oncorhynchus mykiss,FT,Cb/Cw,2.184691431,LogBCF (L/kg bdwt),FW,ArnotGobas,Octanol/Water Partition Coefficients a Bioconcentration Factors of Chloronitrobenzenes in Rainbow Trout (Salmo gairdneri),"Niimi, A.J., H.B. Lee, a G.P. Kissoon",1989,Environ.Toxicol.Chem. 8(9):817-823,[O-][N+](=O)C1=CC=CC(Cl)=C1Cl
3209-22-1,WB,20,Oncorhynchus mykiss,FT,Cb/Cw,2.181843588,LogBCF (L/kg bdwt),FW,ArnotGobas,Octanol/Water Partition Coefficients a Bioconcentration Factors of Chloronitrobenzenes in Rainbow Trout (Salmo gairdneri),"Niimi, A.J., H.B. Lee, a G.P. Kissoon",1989,Environ.Toxicol.Chem. 8(9):817-823,[O-][N+](=O)C1=CC=CC(Cl)=C1Cl
3209-22-1,WB,36,Oncorhynchus mykiss,FT,Cb/Cw,2.178976947,LogBCF (L/kg bdwt),FW,ArnotGobas,Octanol/Water Partition Coefficients a Bioconcentration Factors of Chloronitrobenzenes in Rainbow Trout (Salmo gairdneri),"Niimi, A.J., H.B. Lee, a G.P. Kissoon",1989,Environ.Toxicol.Chem. 8(9):817-823,[O-][N+](=O)C1=CC=CC(Cl)=C1Cl
3209-22-1,WB,28,Oncorhynchus mykiss,FT,Cb/Cw,2.133538908,LogBCF (L/kg bdwt),FW,ArnotGobas,Octanol/Water Partition Coefficients a Bioconcentration Factors of Chloronitrobenzenes in Rainbow Trout (Salmo gairdneri),"Niimi, A.J., H.B. Lee, a G.P. Kissoon",1989,Environ.Toxicol.Chem. 8(9):817-823,[O-][N+](=O)C1=CC=CC(Cl)=C1Cl
3209-22-1,WB,12,Oncorhynchus mykiss,FT,Cb/Cw,2.113943352,LogBCF (L/kg bdwt),FW,ArnotGobas,Octanol/Water Partition Coefficients a Bioconcentration Factors of Chloronitrobenzenes in Rainbow Trout (Salmo gairdneri),"Niimi, A.J., H.B. Lee, a G.P. Kissoon",1989,Environ.Toxicol.Chem. 8(9):817-823,[O-][N+](=O)C1=CC=CC(Cl)=C1Cl
3229-00-3,WB,56,Cyprinus carpio,FT,Cb/Cw,2.622185012,LogBCF (L/kg bdwt),,ArnotGobas,Biodegradation a Bioconcentration of Existing Chemical Substances uer the Chemical Substances Control Law,Chemicals Evaluation a Research Institute,1992,http://qsar.cerij.or.jp/cgi-bin/DEGACC/iex.cgie,BrCC(CBr)(CBr)CBr
3229-00-3,WB,56,Cyprinus carpio,FT,Cb/Cw,1.738022089,LogBCF (L/kg bdwt),,ArnotGobas,Biodegradation a Bioconcentration of Existing Chemical Substances uer the Chemical Substances Control Law,Chemicals Evaluation a Research Institute,1992,http://qsar.cerij.or.jp/cgi-bin/DEGACC/iex.cgie,BrCC(CBr)(CBr)CBr
32598-11-1,WB,30,Danio rerio,FT,K1/K2,5.08,LogBCF (L/kg bdwt),FW,ArnotGobas,Kinetics of Bioconcentration a Clearance of 28 Polychlorinated Biphenyl Congeners in Zebrafish (Brachydanio rerio),"Fox, K., G.P. Zauke, a W. Butte",1994,Ecotoxicol.Environ.Saf. 28(1):99-109,ClC1=CC=C(Cl)C(=C1)C1=CC=C(Cl)C(Cl)=C1
32598-13-3,WB,8,Poecilia reticulata,FT,BIOFAC,4.62324929,LogBCF (L/kg bdwt),FW,ArnotGobas,"Bioconcentration Kinetics of 2,4,5- Tri- a 3,3',4,4'-Tetrachlorobiphenyl a 2,4,5- Tri- a 3,3',4,4'-Tetrachlorodiphenylether in Fish","Opperhuizen, A., a P.I. Voors",1987,Chemosphere 16(10-12):2379-2388,C1=C(C=C(C=C1Cl)Cl)C2=CC(=CC(=C2)Cl)Cl
32598-13-3,WB,30,Danio rerio,FT,K1/K2,5.36,LogBCF (L/kg bdwt),FW,ArnotGobas,Kinetics of Bioconcentration a Clearance of 28 Polychlorinated Biphenyl Congeners in Zebrafish (Brachydanio rerio),"Fox, K., G.P. Zauke, a W. Butte",1994,Ecotoxicol.Environ.Saf. 28(1):99-109,C1=C(C=C(C=C1Cl)Cl)C2=CC(=CC(=C2)Cl)Cl
32669-06-0,WB,56,Cyprinus carpio,FT,Cb/Cw,2.654624205,LogBCF (L/kg bdwt),,ArnotGobas,Biodegradation a Bioconcentration of Existing Chemical Substances uer the Chemical Substances Control Law,Chemicals Evaluation a Research Institute,1992,http://qsar.cerij.or.jp/cgi-bin/DEGACC/iex.cgie,ClCCOC(C1=CC=CC=C1)C1=CC=CC=C1
32669-06-0,WB,56,Cyprinus carpio,FT,Cb/Cw,2.514716211,LogBCF (L/kg bdwt),,ArnotGobas,Biodegradation a Bioconcentration of Existing Chemical Substances uer the Chemical Substances Control Law,Chemicals Evaluation a Research Institute,1992,http://qsar.cerij.or.jp/cgi-bin/DEGACC/iex.cgie,ClCCOC(C1=CC=CC=C1)C1=CC=CC=C1
32774-16-6,WB,30,Danio rerio,FT,K1/K2,5.97,LogBCF (L/kg bdwt),FW,ArnotGobas,Kinetics of Bioconcentration a Clearance of 28 Polychlorinated Biphenyl Congeners in Zebrafish (Brachydanio rerio),"Fox, K., G.P. Zauke, a W. Butte",1994,Ecotoxicol.Environ.Saf. 28(1):99-109,ClC1=CC(=CC(Cl)=C1Cl)C1=CC(Cl)=C(Cl)C(Cl)=C1
32861-85-1,WB,10,Gnathopogon coerulescens,FT,Cb/Cw,3.649432223,LogBCF (L/kg bdwt),FW,ArnotGobas,"Accumulation a Excretion of Oxadiazon, CNP, a Chlomethoxynil by Willow Shiner","Tsuda, T.S.A., M. Kojima, a H. Harada",1990,Comp.Biochem.Physiol.C 96(2):373-375,COC1=CC(OC2=CC=C(Cl)C=C2Cl)=CC=C1[N+]([O-])=O
32861-85-1,WB,7,Gnathopogon coerulescens,FT,Cb/Cw,3.630224411,LogBCF (L/kg bdwt),FW,ArnotGobas,"Accumulation a Excretion of Oxadiazon, CNP, a Chlomethoxynil by Willow Shiner","Tsuda, T.S.A., M. Kojima, a H. Harada",1990,Comp.Biochem.Physiol.C 96(2):373-375,COC1=CC(OC2=CC=C(Cl)C=C2Cl)=CC=C1[N+]([O-])=O
32861-85-1,WB,14,Gnathopogon coerulescens,FT,Cb/Cw,3.48586333,LogBCF (L/kg bdwt),FW,ArnotGobas,"Accumulation a Excretion of Oxadiazon, CNP, a Chlomethoxynil by Willow Shiner","Tsuda, T.S.A., M. Kojima, a H. Harada",1990,Comp.Biochem.Physiol.C 96(2):373-375,COC1=CC(OC2=CC=C(Cl)C=C2Cl)=CC=C1[N+]([O-])=O
328-84-7,WB,90,Oncorhynchus mykiss,FT,Cb/Cw,3.18,LogBCF (L/kg bdwt),FW,ArnotGobas,The Relationship Between Bioconcentration Factor in Rainbow Trout a Physical-Chemical Properties for some Halogenated Compous.,"Oliver, B.G.",1984,In: QSAR in Environmental Toxicology :300-317,FC(F)(F)C1=CC=C(Cl)C(Cl)=C1
330-54-1,WB,42,Cyprinus carpio,FT,Cb/Cw,0.617326975,LogBCF (L/kg bdwt),FW,ArnotGobas,Biodegradation a Bioconcentration of Existing Chemical Substances uer the Chemical Substances Control Law,Chemicals Evaluation a Research Institute,1992,http://qsar.cerij.or.jp/cgi-bin/DEGACC/iex.cgie,CN(C)C(=O)NC1=CC=C(Cl)C(Cl)=C1
330-54-1,WB,42,Cyprinus carpio,FT,Cb/Cw,0.929659176,LogBCF (L/kg bdwt),FW,ArnotGobas,Biodegradation a Bioconcentration of Existing Chemical Substances uer the Chemical Substances Control Law,Chemicals Evaluation a Research Institute,1992,http://qsar.cerij.or.jp/cgi-bin/DEGACC/iex.cgie,CN(C)C(=O)NC1=CC=C(Cl)C(Cl)=C1
330-54-1,WB,24,Pimephales promelas,FT,Cb/Cw,0.301029996,LogBCF (L/kg bdwt),FW,ArnotGobas,"Bromacil a Diuron Herbicides: Toxicity, Uptake a Elimination in Freshwater Fish","Call, D.J., L.T. Brooke, R.J. Kent, M.L. Knuth, S.H. Poirier, J.M. Huot a A.R. Lima",1987,Arch.Environ.Contam.Toxicol. 16(5):607-613,CN(C)C(=O)NC1=CC=C(Cl)C(Cl)=C1
330-55-2,WB,42,Cyprinus carpio,FT,Cb/Cw,1.252745925,LogBCF (L/kg bdwt),,ArnotGobas,Biodegradation a Bioconcentration of Existing Chemical Substances uer the Chemical Substances Control Law,Chemicals Evaluation a Research Institute,1992,http://qsar.cerij.or.jp/cgi-bin/DEGACC/iex.cgie,CON(C)C(=O)NC1=CC=C(Cl)C(Cl)=C1
330-55-2,WB,42,Cyprinus carpio,FT,Cb/Cw,1.244131535,LogBCF (L/kg bdwt),,ArnotGobas,Biodegradation a Bioconcentration of Existing Chemical Substances uer the Chemical Substances Control Law,Chemicals Evaluation a Research Institute,1992,http://qsar.cerij.or.jp/cgi-bin/DEGACC/iex.cgie,CON(C)C(=O)NC1=CC=C(Cl)C(Cl)=C1
333-41-5,WB,1,Gnathopogon coerulescens,FT,Cb/Cw,2.282622113,LogBCF (L/kg bdwt),FW,ArnotGobas,"Bioconcentration a Excretion of Diazinon, IBP, Malathion a Fenitrothion by Willow Shiner","Tsuda, T., S. Aoki, M. Kojima, a H. Harada",1989,Toxicol.Environ.Chem. 24:185-190,CCOP(=S)(OCC)OC1=CC(C)=NC(=N1)C(C)C
333-41-5,WB,42,Cyprinus carpio,FT,Cb/Cw,1.43017968,LogBCF (L/kg bdwt),FW,ArnotGobas,Biodegradation a Bioconcentration of Existing Chemical Substances uer the Chemical Substances Control Law,Chemicals Evaluation a Research Institute,1992,http://qsar.cerij.or.jp/cgi-bin/DEGACC/iex.cgie,CCOP(=S)(OCC)OC1=CC(C)=NC(=N1)C(C)C
333-41-5,WB,42,Cyprinus carpio,FT,Cb/Cw,1.371280324,LogBCF (L/kg bdwt),FW,ArnotGobas,Biodegradation a Bioconcentration of Existing Chemical Substances uer the Chemical Substances Control Law,Chemicals Evaluation a Research Institute,1992,http://qsar.cerij.or.jp/cgi-bin/DEGACC/iex.cgie,CCOP(=S)(OCC)OC1=CC(C)=NC(=N1)C(C)C
333-41-5,,108,Cyprinodon variegatus,,,2.328379603,LogBCF (L/kg bdwt),SW,ArnotGobas,"Diazinon: Chronic Toxicity to, a Brain Acetylcholinesterase Inhibition in, the Sheepshead Minnow, Cyprinodon variegatus","Goodman, L.R., D.J. Hansen, D.L. Coppage, J.C. Moore, a E. Matthews",1979,Trans.Am.Fish.Soc. 108(5):479-488,CCOP(=S)(OCC)OC1=CC(C)=NC(=N1)C(C)C
333-41-5,,108,Cyprinodon variegatus,,,2.167317335,LogBCF (L/kg bdwt),SW,ArnotGobas,"Diazinon: Chronic Toxicity to, a Brain Acetylcholinesterase Inhibition in, the Sheepshead Minnow, Cyprinodon variegatus","Goodman, L.R., D.J. Hansen, D.L. Coppage, J.C. Moore, a E. Matthews",1979,Trans.Am.Fish.Soc. 108(5):479-488,CCOP(=S)(OCC)OC1=CC(C)=NC(=N1)C(C)C
333-41-5,WB,4,Pseudorasbora parva,FT,Cb/Cw,2.322219295,LogBCF (L/kg bdwt),FW,ArnotGobas,Bioconcentration Ratio of Diazinon by Freshwater Fish a Snail,"Kanazawa, J.",1978,Bull.Environ.Contam.Toxicol. 20(5):613-617,CCOP(=S)(OCC)OC1=CC(C)=NC(=N1)C(C)C
333-41-5,WB,7,Pseudorasbora parva,FT,Cb/Cw,2.31386722,LogBCF (L/kg bdwt),FW,ArnotGobas,Bioconcentration Ratio of Diazinon by Freshwater Fish a Snail,"Kanazawa, J.",1978,Bull.Environ.Contam.Toxicol. 20(5):613-617,CCOP(=S)(OCC)OC1=CC(C)=NC(=N1)C(C)C
333-41-5,WB,14,Pseudorasbora parva,FT,Cb/Cw,2.181843588,LogBCF (L/kg bdwt),FW,ArnotGobas,Measurement of the Bioconcentration Factors of Pesticides by Freshwater Fish a Their Correlation with Physicochemical Properties or Acute Toxicities,"Kanazawa, J.",1981,Pestic.Sci. 12(4):417-424,CCOP(=S)(OCC)OC1=CC(C)=NC(=N1)C(C)C
333-41-5,WB,3,Pseudorasbora parva,FT,Cb/Cw,2.230959556,LogBCF (L/kg bdwt),FW,ArnotGobas,Bioconcentration Ratio of Diazinon by Freshwater Fish a Snail,"Kanazawa, J.",1978,Bull.Environ.Contam.Toxicol. 20(5):613-617,CCOP(=S)(OCC)OC1=CC(C)=NC(=N1)C(C)C
333-41-5,WB,14,Pseudorasbora parva,FT,Cb/Cw,2.176091259,LogBCF (L/kg bdwt),FW,ArnotGobas,Bioconcentration Ratio of Diazinon by Freshwater Fish a Snail,"Kanazawa, J.",1978,Bull.Environ.Contam.Toxicol. 20(5):613-617,CCOP(=S)(OCC)OC1=CC(C)=NC(=N1)C(C)C
333-41-5,WB,2,Pseudorasbora parva,FT,Cb/Cw,2.164352856,LogBCF (L/kg bdwt),FW,ArnotGobas,Bioconcentration Ratio of Diazinon by Freshwater Fish a Snail,"Kanazawa, J.",1978,Bull.Environ.Contam.Toxicol. 20(5):613-617,CCOP(=S)(OCC)OC1=CC(C)=NC(=N1)C(C)C
333-41-5,WB,7,Pseudorasbora parva,FT,Cb/Cw,2.072617477,LogBCF (L/kg bdwt),FW,ArnotGobas,Bioconcentration Ratio of Diazinon by Freshwater Fish a Snail,"Kanazawa, J.",1978,Bull.Environ.Contam.Toxicol. 20(5):613-617,CCOP(=S)(OCC)OC1=CC(C)=NC(=N1)C(C)C
333-41-5,WB,1,Pseudorasbora parva,FT,Cb/Cw,2.033423755,LogBCF (L/kg bdwt),FW,ArnotGobas,Bioconcentration Ratio of Diazinon by Freshwater Fish a Snail,"Kanazawa, J.",1978,Bull.Environ.Contam.Toxicol. 20(5):613-617,CCOP(=S)(OCC)OC1=CC(C)=NC(=N1)C(C)C
333-41-5,WB,1,Pseudorasbora parva,FT,Cb/Cw,1.985426474,LogBCF (L/kg bdwt),FW,ArnotGobas,Bioconcentration Ratio of Diazinon by Freshwater Fish a Snail,"Kanazawa, J.",1978,Bull.Environ.Contam.Toxicol. 20(5):613-617,CCOP(=S)(OCC)OC1=CC(C)=NC(=N1)C(C)C
333-41-5,,2,Brachydanio rerio,R,Cb/Cw,2.225309282,LogBCF (L/kg bdwt),FW,ArnotGobas,The Importance of Biotransformation in the Toxicity of Xenobiotics to Fish. I. Toxicity a Bioaccumulation of Diazinon in Guppy (Poecilia reticulata,"Keizer, J., G. DAgostino, a L. Vittozzi",1991,Aquat.Toxicol.21:239-254,CCOP(=S)(OCC)OC1=CC(C)=NC(=N1)C(C)C
333-41-5,,2,Brachydanio rerio,R,Cb/Cw,1.934498451,LogBCF (L/kg bdwt),FW,ArnotGobas,The Importance of Biotransformation in the Toxicity of Xenobiotics to Fish. I. Toxicity a Bioaccumulation of Diazinon in Guppy (Poecilia reticulata,"Keizer, J., G. DAgostino, a L. Vittozzi",1991,Aquat.Toxicol.21:239-254,CCOP(=S)(OCC)OC1=CC(C)=NC(=N1)C(C)C
333-41-5,,2,Poecilia reticulata,R,Cb/Cw,1.770852012,LogBCF (L/kg bdwt),FW,ArnotGobas,The Importance of Biotransformation in the Toxicity of Xenobiotics to Fish. I. Toxicity a Bioaccumulation of Diazinon in Guppy (Poecilia reticulata,"Keizer, J., G. DAgostino, a L. Vittozzi",1991,Aquat.Toxicol.21:239-254,CCOP(=S)(OCC)OC1=CC(C)=NC(=N1)C(C)C
333-41-5,,2,Poecilia reticulata,R,Cb/Cw,1.591064607,LogBCF (L/kg bdwt),FW,ArnotGobas,The Importance of Biotransformation in the Toxicity of Xenobiotics to Fish. I. Toxicity a Bioaccumulation of Diazinon in Guppy (Poecilia reticulata,"Keizer, J., G. DAgostino, a L. Vittozzi",1991,Aquat.Toxicol.21:239-254,CCOP(=S)(OCC)OC1=CC(C)=NC(=N1)C(C)C
333-41-5,WB,6,Poecilia reticulata,R,,2.274157849,LogBCF (L/kg bdwt),FW,ArnotGobas,Comparative Diazinon Toxicity in Guppy a Zebra Fish: Different Role of Oxidative Metabolism,"Keizer, J., G. DAgostino, R. Nagel, F. Gramenzi, a L. Vittozzi",1993,Environ.Toxicol.Chem. 12:1243-1250,CCOP(=S)(OCC)OC1=CC(C)=NC(=N1)C(C)C
333-41-5,WB,2,Poecilia reticulata,R,,1.770852012,LogBCF (L/kg bdwt),FW,ArnotGobas,Comparative Diazinon Toxicity in Guppy a Zebra Fish: Different Role of Oxidative Metabolism,"Keizer, J., G. DAgostino, R. Nagel, F. Gramenzi, a L. Vittozzi",1993,Environ.Toxicol.Chem. 12:1243-1250,CCOP(=S)(OCC)OC1=CC(C)=NC(=N1)C(C)C
333-41-5,,3,Cyprinus carpio,FT,Cb/Cw,2.113943352,LogBCF (L/kg bdwt),FW,ArnotGobas,Intake a Excretion of Diazinon in Freshwater Fishes,"Seguchi, K., a S. Asaka",1981,Bull.Environ.Contam.Toxicol. 27(2):244-249,CCOP(=S)(OCC)OC1=CC(C)=NC(=N1)C(C)C
333-41-5,,7,Cyprinus carpio,FT,Cb/Cw,2.079181246,LogBCF (L/kg bdwt),FW,ArnotGobas,Intake a Excretion of Diazinon in Freshwater Fishes,"Seguchi, K., a S. Asaka",1981,Bull.Environ.Contam.Toxicol. 27(2):244-249,CCOP(=S)(OCC)OC1=CC(C)=NC(=N1)C(C)C
333-41-5,,14,Cyprinus carpio,FT,Cb/Cw,2.079181246,LogBCF (L/kg bdwt),FW,ArnotGobas,Intake a Excretion of Diazinon in Freshwater Fishes,"Seguchi, K., a S. Asaka",1981,Bull.Environ.Contam.Toxicol. 27(2):244-249,CCOP(=S)(OCC)OC1=CC(C)=NC(=N1)C(C)C
333-41-5,,3,Oncorhynchus mykiss,FT,Cb/Cw,1.963787827,LogBCF (L/kg bdwt),FW,ArnotGobas,Intake a Excretion of Diazinon in Freshwater Fishes,"Seguchi, K., a S. Asaka",1981,Bull.Environ.Contam.Toxicol. 27(2):244-249,CCOP(=S)(OCC)OC1=CC(C)=NC(=N1)C(C)C
333-41-5,,7,Oncorhynchus mykiss,FT,Cb/Cw,1.806179974,LogBCF (L/kg bdwt),FW,ArnotGobas,Intake a Excretion of Diazinon in Freshwater Fishes,"Seguchi, K., a S. Asaka",1981,Bull.Environ.Contam.Toxicol. 27(2):244-249,CCOP(=S)(OCC)OC1=CC(C)=NC(=N1)C(C)C
333-41-5,,14,Oncorhynchus mykiss,FT,Cb/Cw,1.792391689,LogBCF (L/kg bdwt),FW,ArnotGobas,Intake a Excretion of Diazinon in Freshwater Fishes,"Seguchi, K., a S. Asaka",1981,Bull.Environ.Contam.Toxicol. 27(2):244-249,CCOP(=S)(OCC)OC1=CC(C)=NC(=N1)C(C)C
333-41-5,,14,Misgurnus anguillicaudatus,FT,Cb/Cw,1.447158031,LogBCF (L/kg bdwt),FW,ArnotGobas,Intake a Excretion of Diazinon in Freshwater Fishes,"Seguchi, K., a S. Asaka",1981,Bull.Environ.Contam.Toxicol. 27(2):244-249,CCOP(=S)(OCC)OC1=CC(C)=NC(=N1)C(C)C
333-41-5,,3,Misgurnus anguillicaudatus,FT,Cb/Cw,1.380211242,LogBCF (L/kg bdwt),FW,ArnotGobas,Intake a Excretion of Diazinon in Freshwater Fishes,"Seguchi, K., a S. Asaka",1981,Bull.Environ.Contam.Toxicol. 27(2):244-249,CCOP(=S)(OCC)OC1=CC(C)=NC(=N1)C(C)C
333-41-5,,7,Misgurnus anguillicaudatus,FT,Cb/Cw,1.380211242,LogBCF (L/kg bdwt),FW,ArnotGobas,Intake a Excretion of Diazinon in Freshwater Fishes,"Seguchi, K., a S. Asaka",1981,Bull.Environ.Contam.Toxicol. 27(2):244-249,CCOP(=S)(OCC)OC1=CC(C)=NC(=N1)C(C)C
333-41-5,WB,5,Poecilia reticulata,FT,Cb/Cw,2.152288344,LogBCF (L/kg bdwt),FW,ArnotGobas,Relationships of Bioconcentration Factors of Organophosphate Pesticides Among Species of Fish,"Tsuda, T., M. Kojima, H. Harada, A. Nakajima, a S. Aoki",1997,Comp.Biochem.Physiol.C 116(3):213-218,CCOP(=S)(OCC)OC1=CC(C)=NC(=N1)C(C)C
333-41-5,WB,7,Poecilia reticulata,FT,Cb/Cw,2.086359831,LogBCF (L/kg bdwt),FW,ArnotGobas,Relationships of Bioconcentration Factors of Organophosphate Pesticides Among Species of Fish,"Tsuda, T., M. Kojima, H. Harada, A. Nakajima, a S. Aoki",1997,Comp.Biochem.Physiol.C 116(3):213-218,CCOP(=S)(OCC)OC1=CC(C)=NC(=N1)C(C)C
333-41-5,WB,5,Poecilia reticulata,FT,Cb/Cw,1.992553518,LogBCF (L/kg bdwt),FW,ArnotGobas,Relationships of Bioconcentration Factors of Organophosphate Pesticides Among Species of Fish,"Tsuda, T., M. Kojima, H. Harada, A. Nakajima, a S. Aoki",1997,Comp.Biochem.Physiol.C 116(3):213-218,CCOP(=S)(OCC)OC1=CC(C)=NC(=N1)C(C)C
333-41-5,WB,3,Poecilia reticulata,FT,Cb/Cw,1.923761961,LogBCF (L/kg bdwt),FW,ArnotGobas,Relationships of Bioconcentration Factors of Organophosphate Pesticides Among Species of Fish,"Tsuda, T., M. Kojima, H. Harada, A. Nakajima, a S. Aoki",1997,Comp.Biochem.Physiol.C 116(3):213-218,CCOP(=S)(OCC)OC1=CC(C)=NC(=N1)C(C)C
333-41-5,WB,5,Oryzias latipes,FT,Cb/Cw,1.973589623,LogBCF (L/kg bdwt),FW,ArnotGobas,Relationships of Bioconcentration Factors of Organophosphate Pesticides Among Species of Fish,"Tsuda, T., M. Kojima, H. Harada, A. Nakajima, a S. Aoki",1997,Comp.Biochem.Physiol.C 116(3):213-218,CCOP(=S)(OCC)OC1=CC(C)=NC(=N1)C(C)C
333-41-5,WB,7,Poecilia reticulata,FT,Cb/Cw,1.880241776,LogBCF (L/kg bdwt),FW,ArnotGobas,Relationships of Bioconcentration Factors of Organophosphate Pesticides Among Species of Fish,"Tsuda, T., M. Kojima, H. Harada, A. Nakajima, a S. Aoki",1997,Comp.Biochem.Physiol.C 116(3):213-218,CCOP(=S)(OCC)OC1=CC(C)=NC(=N1)C(C)C
333-41-5,WB,7,Oryzias latipes,FT,Cb/Cw,1.909556029,LogBCF (L/kg bdwt),FW,ArnotGobas,Relationships of Bioconcentration Factors of Organophosphate Pesticides Among Species of Fish,"Tsuda, T., M. Kojima, H. Harada, A. Nakajima, a S. Aoki",1997,Comp.Biochem.Physiol.C 116(3):213-218,CCOP(=S)(OCC)OC1=CC(C)=NC(=N1)C(C)C
333-41-5,WB,3,Poecilia reticulata,FT,Cb/Cw,1.848189117,LogBCF (L/kg bdwt),FW,ArnotGobas,Relationships of Bioconcentration Factors of Organophosphate Pesticides Among Species of Fish,"Tsuda, T., M. Kojima, H. Harada, A. Nakajima, a S. Aoki",1997,Comp.Biochem.Physiol.C 116(3):213-218,CCOP(=S)(OCC)OC1=CC(C)=NC(=N1)C(C)C
333-41-5,WB,5,Carassius auratus,FT,Cb/Cw,1.687528961,LogBCF (L/kg bdwt),FW,ArnotGobas,Relationships of Bioconcentration Factors of Organophosphate Pesticides Among Species of Fish,"Tsuda, T., M. Kojima, H. Harada, A. Nakajima, a S. Aoki",1997,Comp.Biochem.Physiol.C 116(3):213-218,CCOP(=S)(OCC)OC1=CC(C)=NC(=N1)C(C)C
333-41-5,WB,5,Oryzias latipes,FT,Cb/Cw,1.799340549,LogBCF (L/kg bdwt),FW,ArnotGobas,"Acute Toxicity, Accumulation a Excretion of Organophosphorous Insecticides a Their Oxidation Products in Killifish","Tsuda, T., M. Kojima, H. Harada, A. Nakajima, a S. Aoki",1997,Chemosphere 35(5):939-949,CCOP(=S)(OCC)OC1=CC(C)=NC(=N1)C(C)C
333-41-5,WB,3,Carassius auratus,FT,Cb/Cw,1.617000341,LogBCF (L/kg bdwt),FW,ArnotGobas,Relationships of Bioconcentration Factors of Organophosphate Pesticides Among Species of Fish,"Tsuda, T., M. Kojima, H. Harada, A. Nakajima, a S. Aoki",1997,Comp.Biochem.Physiol.C 116(3):213-218,CCOP(=S)(OCC)OC1=CC(C)=NC(=N1)C(C)C
333-41-5,WB,0.5,Poecilia reticulata,FT,Cb/Cw,1.685741739,LogBCF (L/kg bdwt),FW,ArnotGobas,Relationships of Bioconcentration Factors of Organophosphate Pesticides Among Species of Fish,"Tsuda, T., M. Kojima, H. Harada, A. Nakajima, a S. Aoki",1997,Comp.Biochem.Physiol.C 116(3):213-218,CCOP(=S)(OCC)OC1=CC(C)=NC(=N1)C(C)C
333-41-5,WB,3,Oryzias latipes,FT,Cb/Cw,1.752816431,LogBCF (L/kg bdwt),FW,ArnotGobas,Relationships of Bioconcentration Factors of Organophosphate Pesticides Among Species of Fish,"Tsuda, T., M. Kojima, H. Harada, A. Nakajima, a S. Aoki",1997,Comp.Biochem.Physiol.C 116(3):213-218,CCOP(=S)(OCC)OC1=CC(C)=NC(=N1)C(C)C
333-41-5,WB,0.5,Carassius auratus,FT,Cb/Cw,1.557507202,LogBCF (L/kg bdwt),FW,ArnotGobas,Relationships of Bioconcentration Factors of Organophosphate Pesticides Among Species of Fish,"Tsuda, T., M. Kojima, H. Harada, A. Nakajima, a S. Aoki",1997,Comp.Biochem.Physiol.C 116(3):213-218,CCOP(=S)(OCC)OC1=CC(C)=NC(=N1)C(C)C
333-41-5,WB,3,Oryzias latipes,FT,Cb/Cw,1.716003344,LogBCF (L/kg bdwt),FW,ArnotGobas,"Acute Toxicity, Accumulation a Excretion of Organophosphorous Insecticides a Their Oxidation Products in Killifish","Tsuda, T., M. Kojima, H. Harada, A. Nakajima, a S. Aoki",1997,Chemosphere 35(5):939-949,CCOP(=S)(OCC)OC1=CC(C)=NC(=N1)C(C)C
333-41-5,WB,0.5,Poecilia reticulata,FT,Cb/Cw,1.617000341,LogBCF (L/kg bdwt),FW,ArnotGobas,Relationships of Bioconcentration Factors of Organophosphate Pesticides Among Species of Fish,"Tsuda, T., M. Kojima, H. Harada, A. Nakajima, a S. Aoki",1997,Comp.Biochem.Physiol.C 116(3):213-218,CCOP(=S)(OCC)OC1=CC(C)=NC(=N1)C(C)C
333-41-5,WB,1,Oryzias latipes,FT,Cb/Cw,1.681241237,LogBCF (L/kg bdwt),FW,ArnotGobas,"Acute Toxicity, Accumulation a Excretion of Organophosphorous Insecticides a Their Oxidation Products in Killifish","Tsuda, T., M. Kojima, H. Harada, A. Nakajima, a S. Aoki",1997,Chemosphere 35(5):939-949,CCOP(=S)(OCC)OC1=CC(C)=NC(=N1)C(C)C
333-41-5,WB,1,Poecilia reticulata,FT,Cb/Cw,1.598790507,LogBCF (L/kg bdwt),FW,ArnotGobas,Relationships of Bioconcentration Factors of Organophosphate Pesticides Among Species of Fish,"Tsuda, T., M. Kojima, H. Harada, A. Nakajima, a S. Aoki",1997,Comp.Biochem.Physiol.C 116(3):213-218,CCOP(=S)(OCC)OC1=CC(C)=NC(=N1)C(C)C
333-41-5,WB,7,Oryzias latipes,FT,Cb/Cw,1.612783857,LogBCF (L/kg bdwt),FW,ArnotGobas,"Acute Toxicity, Accumulation a Excretion of Organophosphorous Insecticides a Their Oxidation Products in Killifish","Tsuda, T., M. Kojima, H. Harada, A. Nakajima, a S. Aoki",1997,Chemosphere 35(5):939-949,CCOP(=S)(OCC)OC1=CC(C)=NC(=N1)C(C)C
333-41-5,WB,1,Poecilia reticulata,FT,Cb/Cw,1.536558443,LogBCF (L/kg bdwt),FW,ArnotGobas,Relationships of Bioconcentration Factors of Organophosphate Pesticides Among Species of Fish,"Tsuda, T., M. Kojima, H. Harada, A. Nakajima, a S. Aoki",1997,Comp.Biochem.Physiol.C 116(3):213-218,CCOP(=S)(OCC)OC1=CC(C)=NC(=N1)C(C)C
333-41-5,WB,2,Oryzias latipes,FT,Cb/Cw,1.602059991,LogBCF (L/kg bdwt),FW,ArnotGobas,"Acute Toxicity, Accumulation a Excretion of Organophosphorous Insecticides a Their Oxidation Products in Killifish","Tsuda, T., M. Kojima, H. Harada, A. Nakajima, a S. Aoki",1997,Chemosphere 35(5):939-949,CCOP(=S)(OCC)OC1=CC(C)=NC(=N1)C(C)C
333-41-5,WB,7,Carassius auratus,FT,Cb/Cw,1.409933123,LogBCF (L/kg bdwt),FW,ArnotGobas,Relationships of Bioconcentration Factors of Organophosphate Pesticides Among Species of Fish,"Tsuda, T., M. Kojima, H. Harada, A. Nakajima, a S. Aoki",1997,Comp.Biochem.Physiol.C 116(3):213-218,CCOP(=S)(OCC)OC1=CC(C)=NC(=N1)C(C)C
333-41-5,WB,0.5,Oryzias latipes,FT,Cb/Cw,1.565847819,LogBCF (L/kg bdwt),FW,ArnotGobas,Relationships of Bioconcentration Factors of Organophosphate Pesticides Among Species of Fish,"Tsuda, T., M. Kojima, H. Harada, A. Nakajima, a S. Aoki",1997,Comp.Biochem.Physiol.C 116(3):213-218,CCOP(=S)(OCC)OC1=CC(C)=NC(=N1)C(C)C
333-41-5,WB,1,Carassius auratus,FT,Cb/Cw,1.378397901,LogBCF (L/kg bdwt),FW,ArnotGobas,Relationships of Bioconcentration Factors of Organophosphate Pesticides Among Species of Fish,"Tsuda, T., M. Kojima, H. Harada, A. Nakajima, a S. Aoki",1997,Comp.Biochem.Physiol.C 116(3):213-218,CCOP(=S)(OCC)OC1=CC(C)=NC(=N1)C(C)C
333-41-5,WB,1,Oryzias latipes,FT,Cb/Cw,1.481442629,LogBCF (L/kg bdwt),FW,ArnotGobas,Relationships of Bioconcentration Factors of Organophosphate Pesticides Among Species of Fish,"Tsuda, T., M. Kojima, H. Harada, A. Nakajima, a S. Aoki",1997,Comp.Biochem.Physiol.C 116(3):213-218,CCOP(=S)(OCC)OC1=CC(C)=NC(=N1)C(C)C
333-41-5,WB,3,Tanichthys albonubes,FT,Cb/Cw,1.552668216,LogBCF (L/kg bdwt),FW,ArnotGobas,Relationships of Bioconcentration Factors of Organophosphate Pesticides Among Species of Fish,"Tsuda, T., M. Kojima, H. Harada, A. Nakajima, a S. Aoki",1997,Comp.Biochem.Physiol.C 116(3):213-218,CCOP(=S)(OCC)OC1=CC(C)=NC(=N1)C(C)C
333-41-5,WB,0.5,Oryzias latipes,FT,Cb/Cw,1.414973348,LogBCF (L/kg bdwt),FW,ArnotGobas,"Acute Toxicity, Accumulation a Excretion of Organophosphorous Insecticides a Their Oxidation Products in Killifish","Tsuda, T., M. Kojima, H. Harada, A. Nakajima, a S. Aoki",1997,Chemosphere 35(5):939-949,CCOP(=S)(OCC)OC1=CC(C)=NC(=N1)C(C)C
333-41-5,WB,1,Tanichthys albonubes,FT,Cb/Cw,1.305351369,LogBCF (L/kg bdwt),FW,ArnotGobas,Relationships of Bioconcentration Factors of Organophosphate Pesticides Among Species of Fish,"Tsuda, T., M. Kojima, H. Harada, A. Nakajima, a S. Aoki",1997,Comp.Biochem.Physiol.C 116(3):213-218,CCOP(=S)(OCC)OC1=CC(C)=NC(=N1)C(C)C
333-41-5,WB,0.5,Tanichthys albonubes,FT,Cb/Cw,1.212187604,LogBCF (L/kg bdwt),FW,ArnotGobas,Relationships of Bioconcentration Factors of Organophosphate Pesticides Among Species of Fish,"Tsuda, T., M. Kojima, H. Harada, A. Nakajima, a S. Aoki",1997,Comp.Biochem.Physiol.C 116(3):213-218,CCOP(=S)(OCC)OC1=CC(C)=NC(=N1)C(C)C
333-41-5,WB,7,Gnathopogon coerulescens,FT,Cb/Cw,2.438384107,LogBCF (L/kg bdwt),FW,ArnotGobas,"Bioconcentration a Excretion of Diazinon, IBP, Malathion a Fenitrothion by Willow Shiner","Tsuda, T., S. Aoki, M. Kojima, a H. Harada",1989,Toxicol.Environ.Chem. 24:185-190,CCOP(=S)(OCC)OC1=CC(C)=NC(=N1)C(C)C
333-41-5,WB,2,Gnathopogon coerulescens,FT,Cb/Cw,2.39497672,LogBCF (L/kg bdwt),FW,ArnotGobas,"Bioconcentration a Excretion of Diazinon, IBP, Malathion a Fenitrothion by Willow Shiner","Tsuda, T., S. Aoki, M. Kojima, a H. Harada",1989,Toxicol.Environ.Chem. 24:185-190,CCOP(=S)(OCC)OC1=CC(C)=NC(=N1)C(C)C
333-41-5,WB,3,Gnathopogon coerulescens,FT,Cb/Cw,2.344588743,LogBCF (L/kg bdwt),FW,ArnotGobas,"Bioconcentration a Excretion of Diazinon, IBP, Malathion a Fenitrothion by Willow Shiner","Tsuda, T., S. Aoki, M. Kojima, a H. Harada",1989,Toxicol.Environ.Chem. 24:185-190,CCOP(=S)(OCC)OC1=CC(C)=NC(=N1)C(C)C
333-41-5,WB,3,Oryzias latipes,FT,Cb/Cw,1.447158031,LogBCF (L/kg bdwt),FW,ArnotGobas,"Accumulation a Excretion of Diazinon, Fenthion a Fenitrothion by Killifish: Comparison of Iividual a Mixed Pesticides","Tsuda, T., S. Aoki, T. Inoue, a M. Kojima",1995,Water Res. 29(2):455-458,CCOP(=S)(OCC)OC1=CC(C)=NC(=N1)C(C)C
333-41-5,,210,Salvelinus fontinalis,,,1.71,LogBCF (L/kg bdwt),,ArnotGobas,Toxicity of Diazinon to Brook Trout a Fathead Minnows,"Allison, D.T., a R.O. Hermanutz",1977,"EPA-600/3-77-060, U.S.EPA, Duluth, MN :69 p.",CCOP(=S)(OCC)OC1=CC(C)=NC(=N1)C(C)C
333-41-5,,210,Salvelinus fontinalis,,,1.54,LogBCF (L/kg bdwt),,ArnotGobas,Toxicity of Diazinon to Brook Trout a Fathead Minnows,"Allison, D.T., a R.O. Hermanutz",1977,"EPA-600/3-77-060, U.S.EPA, Duluth, MN :69 p.",CCOP(=S)(OCC)OC1=CC(C)=NC(=N1)C(C)C
333-41-5,,180,Salvelinus fontinalis,,,1.15,LogBCF (L/kg bdwt),,ArnotGobas,Toxicity of Diazinon to Brook Trout a Fathead Minnows,"Allison, D.T., a R.O. Hermanutz",1977,"EPA-600/3-77-060, U.S.EPA, Duluth, MN :69 p.",CCOP(=S)(OCC)OC1=CC(C)=NC(=N1)C(C)C
33857-26-0,WB,8,Poecilia reticulata,FT,Cb/Cw,2.56,LogBCF (L/kg bdwt),FW,ArnotGobas,Bioaccumulation of Some Polychlorinated Dibenzo-p-Dioxins a Octachlorodibenzofuran in the Guppy (Poecilia reticulata),"Gobas, F.A.P.C., a S.M. Schrap",1990,Chemosphere 20(5):495-512,ClC1=CC=C2OC3=CC(Cl)=CC=C3OC2=C1
3389-71-7,WB,30,Pimephales promelas,FT,Cb/Cw,3.806179974,LogBCF (L/kg bdwt),FW,ArnotGobas,"Toxicity a Bioaccumulation of Hexachlorocyclopentadiene, Hexachloronorbornadiene a Heptachloronorbornene in Larval a Early Juvenile Fathead Minnows, Pimephales promelas","Spehar, R.L., G.D. Veith, D.L. De Foe, a B.V. Bergstedt",1979,Bull.Environ.Contam.Toxicol. 21(4/5):576-583,ClC1=C(Cl)C2(Cl)C=CC1(Cl)C2(Cl)Cl
34883-39-1,WB,75,Oncorhynchus mykiss,FT,Cb/Cw,4.113943352,LogBCF (L/kg bdwt),FW,ArnotGobas,Bioconcentration Factors of Some Halogenated Organics for Rainbow Trout: Limitations in Their Use for Prediction of Environmental Residues,"Oliver, B.G., a A.J. Niimi",1985,Environ.Sci.Technol. 19(9):842-849,ClC1=CC=C(Cl)C(=C1)C1=CC=CC=C1
34883-39-1,WB,50,Oncorhynchus mykiss,FT,Cb/Cw,4,LogBCF (L/kg bdwt),FW,ArnotGobas,Bioconcentration Factors of Some Halogenated Organics for Rainbow Trout: Limitations in Their Use for Prediction of Environmental Residues,"Oliver, B.G., a A.J. Niimi",1985,Environ.Sci.Technol. 19(9):842-849,ClC1=CC=C(Cl)C(=C1)C1=CC=CC=C1
34883-39-1,WB,96,Oncorhynchus mykiss,FT,Cb/Cw,3.903089987,LogBCF (L/kg bdwt),FW,ArnotGobas,Bioconcentration Factors of Some Halogenated Organics for Rainbow Trout: Limitations in Their Use for Prediction of Environmental Residues,"Oliver, B.G., a A.J. Niimi",1985,Environ.Sci.Technol. 19(9):842-849,ClC1=CC=C(Cl)C(=C1)C1=CC=CC=C1
34883-39-1,WB,35,Oncorhynchus mykiss,FT,Cb/Cw,3.903089987,LogBCF (L/kg bdwt),FW,ArnotGobas,Bioconcentration Factors of Some Halogenated Organics for Rainbow Trout: Limitations in Their Use for Prediction of Environmental Residues,"Oliver, B.G., a A.J. Niimi",1985,Environ.Sci.Technol. 19(9):842-849,ClC1=CC=C(Cl)C(=C1)C1=CC=CC=C1
34883-39-1,WB,30,Danio rerio,FT,K1/K2,3.89,LogBCF (L/kg bdwt),FW,ArnotGobas,Kinetics of Bioconcentration a Clearance of 28 Polychlorinated Biphenyl Congeners in Zebrafish (Brachydanio rerio),"Fox, K., G.P. Zauke, a W. Butte",1994,Ecotoxicol.Environ.Saf. 28(1):99-109,ClC1=CC=C(Cl)C(=C1)C1=CC=CC=C1
34883-41-5,WB,75,Oncorhynchus mykiss,FT,Cb/Cw,3.826074803,LogBCF (L/kg bdwt),FW,ArnotGobas,Bioconcentration Factors of Some Halogenated Organics for Rainbow Trout: Limitations in Their Use for Prediction of Environmental Residues,"Oliver, B.G., a A.J. Niimi",1985,Environ.Sci.Technol. 19(9):842-849,ClC1=CC(=CC(Cl)=C1)C1=CC=CC=C1
34883-41-5,WB,50,Oncorhynchus mykiss,FT,Cb/Cw,3.785329835,LogBCF (L/kg bdwt),FW,ArnotGobas,Bioconcentration Factors of Some Halogenated Organics for Rainbow Trout: Limitations in Their Use for Prediction of Environmental Residues,"Oliver, B.G., a A.J. Niimi",1985,Environ.Sci.Technol. 19(9):842-849,ClC1=CC(=CC(Cl)=C1)C1=CC=CC=C1
34883-41-5,WB,96,Oncorhynchus mykiss,FT,Cb/Cw,3.73239376,LogBCF (L/kg bdwt),FW,ArnotGobas,Bioconcentration Factors of Some Halogenated Organics for Rainbow Trout: Limitations in Their Use for Prediction of Environmental Residues,"Oliver, B.G., a A.J. Niimi",1985,Environ.Sci.Technol. 19(9):842-849,ClC1=CC(=CC(Cl)=C1)C1=CC=CC=C1
34883-41-5,WB,35,Oncorhynchus mykiss,FT,Cb/Cw,3.748188027,LogBCF (L/kg bdwt),FW,ArnotGobas,Bioconcentration Factors of Some Halogenated Organics for Rainbow Trout: Limitations in Their Use for Prediction of Environmental Residues,"Oliver, B.G., a A.J. Niimi",1985,Environ.Sci.Technol. 19(9):842-849,ClC1=CC(=CC(Cl)=C1)C1=CC=CC=C1
35065-27-1,WB,7,Poecilia reticulata,FT,K1/K2,5.693830365,LogBCF (L/kg bdwt),FW,ArnotGobas,Relationships between Aqueous Oxygen Concentration a Uptake a Elimination Rates During Bioconcentration of Hydrophobic Chemicals in Fish,"Opperhuizen, A., a S.M. Schrap",1987,Environ.Toxicol.Chem. 6(5):335-342,ClC1=CC(Cl)=C(C=C1Cl)C1=CC(Cl)=C(Cl)C=C1Cl
35065-27-1,WB,30,Danio rerio,FT,K1/K2,5.65,LogBCF (L/kg bdwt),FW,ArnotGobas,Kinetics of Bioconcentration a Clearance of 28 Polychlorinated Biphenyl Congeners in Zebrafish (Brachydanio rerio),"Fox, K., G.P. Zauke, a W. Butte",1994,Ecotoxicol.Environ.Saf. 28(1):99-109,ClC1=CC(Cl)=C(C=C1Cl)C1=CC(Cl)=C(Cl)C=C1Cl
35693-99-3,WB,12,Poecilia reticulata,FT,K1/K2,4.832913357,LogBCF (L/kg bdwt),FW,ArnotGobas,Bioconcentration of Polybrominated Benzenes a Biphenyls a Related Superhydrophobic Chemicals in Fish: Role of Bioavailability a Elimination into the Feces.,"Gobas, F.A.P.C., K.E. Clark, W.Y. Shiu a D. Mackay",1989,Environ. Toxicol. Chem 8:231-245,ClC1=CC=C(Cl)C(=C1)C1=CC(Cl)=CC=C1Cl
35693-99-3,WB,7,Poecilia reticulata,FT,K1/K2,4.636822098,LogBCF (L/kg bdwt),FW,ArnotGobas,Relationships between Aqueous Oxygen Concentration a Uptake a Elimination Rates During Bioconcentration of Hydrophobic Chemicals in Fish,"Opperhuizen, A., a S.M. Schrap",1987,Environ.Toxicol.Chem. 6(5):335-342,ClC1=CC=C(Cl)C(=C1)C1=CC(Cl)=CC=C1Cl
35693-99-3,WB,30,Danio rerio,FT,K1/K2,4.92,LogBCF (L/kg bdwt),FW,ArnotGobas,Kinetics of Bioconcentration a Clearance of 28 Polychlorinated Biphenyl Congeners in Zebrafish (Brachydanio rerio),"Fox, K., G.P. Zauke, a W. Butte",1994,Ecotoxicol.Environ.Saf. 28(1):99-109,ClC1=CC=C(Cl)C(=C1)C1=CC(Cl)=CC=C1Cl
35694-06-5,WB,30,Danio rerio,FT,K1/K2,5.88,LogBCF (L/kg bdwt),FW,ArnotGobas,Kinetics of Bioconcentration a Clearance of 28 Polychlorinated Biphenyl Congeners in Zebrafish (Brachydanio rerio),"Fox, K., G.P. Zauke, a W. Butte",1994,Ecotoxicol.Environ.Saf. 28(1):99-109,ClC1=CC=C(C(Cl)=C1)C1=CC(Cl)=C(Cl)C(Cl)=C1Cl
35694-08-7,WB,30,Danio rerio,FT,K1/K2,5.81,LogBCF (L/kg bdwt),FW,ArnotGobas,Kinetics of Bioconcentration a Clearance of 28 Polychlorinated Biphenyl Congeners in Zebrafish (Brachydanio rerio),"Fox, K., G.P. Zauke, a W. Butte",1994,Ecotoxicol.Environ.Saf. 28(1):99-109,ClC1=CC(=C(Cl)C(Cl)=C1Cl)C1=CC(Cl)=C(Cl)C(Cl)=C1Cl
35860-37-8,WB,84,Cyprinus carpio,FT,Cb/Cw,3.938519725,LogBCF (L/kg bdwt),,ArnotGobas,Biodegradation a Bioconcentration of Existing Chemical Substances uer the Chemical Substances Control Law,National Institute of Technology a Evaluation,2005,http://www.nite.go.jp/iex-e.html,CC(C)C1=CC(C(C)C)=C2C=CC=C(C(C)C)C2=C1
35860-37-8,WB,84,Cyprinus carpio,FT,Cb/Cw,3.695481676,LogBCF (L/kg bdwt),,ArnotGobas,Biodegradation a Bioconcentration of Existing Chemical Substances uer the Chemical Substances Control Law,National Institute of Technology a Evaluation,2005,http://www.nite.go.jp/iex-e.html,CC(C)C1=CC(C(C)C)=C2C=CC=C(C(C)C)C2=C1
3618-60-8,WB,42,Cyprinus carpio,FT,Cb/Cw,-0.189150516,LogBCF (L/kg bdwt),,ArnotGobas,Biodegradation a Bioconcentration of Existing Chemical Substances uer the Chemical Substances Control Law,Chemicals Evaluation a Research Institute,1992,http://qsar.cerij.or.jp/cgi-bin/DEGACC/iex.cgie,OC1=CC=CC2=C1C=CC(=NNC1=C(O)C(=CC(Cl)=C1)S(O)(=O)=O)C2=O
3618-60-8,WB,42,Cyprinus carpio,FT,Cb/Cw,0.57847339,LogBCF (L/kg bdwt),,ArnotGobas,Biodegradation a Bioconcentration of Existing Chemical Substances uer the Chemical Substances Control Law,Chemicals Evaluation a Research Institute,1992,http://qsar.cerij.or.jp/cgi-bin/DEGACC/iex.cgie,OC1=CC=CC2=C1C=CC(=NNC1=C(O)C(=CC(Cl)=C1)S(O)(=O)=O)C2=O
36335-67-8,WB,5,Poecilia reticulata,FT,Cb/Cw,2.738780558,LogBCF (L/kg bdwt),FW,ArnotGobas,Relationships of Bioconcentration Factors of Organophosphate Pesticides Among Species of Fish,"Tsuda, T., M. Kojima, H. Harada, A. Nakajima, a S. Aoki",1997,Comp.Biochem.Physiol.C 116(3):213-218,CCOP(=S)(NC(C)CC)OC1=CC(C)=CC=C1[N+]([O-])=O
36335-67-8,WB,7.01,Poecilia reticulata,FT,Cb/Cw,2.704150517,LogBCF (L/kg bdwt),FW,ArnotGobas,Relationships of Bioconcentration Factors of Organophosphate Pesticides Among Species of Fish,"Tsuda, T., M. Kojima, H. Harada, A. Nakajima, a S. Aoki",1997,Comp.Biochem.Physiol.C 116(3):213-218,CCOP(=S)(NC(C)CC)OC1=CC(C)=CC=C1[N+]([O-])=O
36335-67-8,WB,7.01,Oryzias latipes,FT,Cb/Cw,2.589949601,LogBCF (L/kg bdwt),FW,ArnotGobas,Relationships of Bioconcentration Factors of Organophosphate Pesticides Among Species of Fish,"Tsuda, T., M. Kojima, H. Harada, A. Nakajima, a S. Aoki",1997,Comp.Biochem.Physiol.C 116(3):213-218,CCOP(=S)(NC(C)CC)OC1=CC(C)=CC=C1[N+]([O-])=O
36335-67-8,WB,5,Oryzias latipes,FT,Cb/Cw,2.587710965,LogBCF (L/kg bdwt),FW,ArnotGobas,Relationships of Bioconcentration Factors of Organophosphate Pesticides Among Species of Fish,"Tsuda, T., M. Kojima, H. Harada, A. Nakajima, a S. Aoki",1997,Comp.Biochem.Physiol.C 116(3):213-218,CCOP(=S)(NC(C)CC)OC1=CC(C)=CC=C1[N+]([O-])=O
36335-67-8,WB,5,Poecilia reticulata,FT,Cb/Cw,2.498310554,LogBCF (L/kg bdwt),FW,ArnotGobas,Relationships of Bioconcentration Factors of Organophosphate Pesticides Among Species of Fish,"Tsuda, T., M. Kojima, H. Harada, A. Nakajima, a S. Aoki",1997,Comp.Biochem.Physiol.C 116(3):213-218,CCOP(=S)(NC(C)CC)OC1=CC(C)=CC=C1[N+]([O-])=O
36335-67-8,WB,5,Carassius auratus,FT,Cb/Cw,2.350248018,LogBCF (L/kg bdwt),FW,ArnotGobas,Relationships of Bioconcentration Factors of Organophosphate Pesticides Among Species of Fish,"Tsuda, T., M. Kojima, H. Harada, A. Nakajima, a S. Aoki",1997,Comp.Biochem.Physiol.C 116(3):213-218,CCOP(=S)(NC(C)CC)OC1=CC(C)=CC=C1[N+]([O-])=O
36335-67-8,WB,3,Poecilia reticulata,FT,Cb/Cw,2.423245874,LogBCF (L/kg bdwt),FW,ArnotGobas,Relationships of Bioconcentration Factors of Organophosphate Pesticides Among Species of Fish,"Tsuda, T., M. Kojima, H. Harada, A. Nakajima, a S. Aoki",1997,Comp.Biochem.Physiol.C 116(3):213-218,CCOP(=S)(NC(C)CC)OC1=CC(C)=CC=C1[N+]([O-])=O
36335-67-8,WB,7.01,Poecilia reticulata,FT,Cb/Cw,2.428134794,LogBCF (L/kg bdwt),FW,ArnotGobas,Relationships of Bioconcentration Factors of Organophosphate Pesticides Among Species of Fish,"Tsuda, T., M. Kojima, H. Harada, A. Nakajima, a S. Aoki",1997,Comp.Biochem.Physiol.C 116(3):213-218,CCOP(=S)(NC(C)CC)OC1=CC(C)=CC=C1[N+]([O-])=O
36335-67-8,WB,3,Carassius auratus,FT,Cb/Cw,2.28780173,LogBCF (L/kg bdwt),FW,ArnotGobas,Relationships of Bioconcentration Factors of Organophosphate Pesticides Among Species of Fish,"Tsuda, T., M. Kojima, H. Harada, A. Nakajima, a S. Aoki",1997,Comp.Biochem.Physiol.C 116(3):213-218,CCOP(=S)(NC(C)CC)OC1=CC(C)=CC=C1[N+]([O-])=O
36335-67-8,WB,3,Oryzias latipes,FT,Cb/Cw,2.399673721,LogBCF (L/kg bdwt),FW,ArnotGobas,Relationships of Bioconcentration Factors of Organophosphate Pesticides Among Species of Fish,"Tsuda, T., M. Kojima, H. Harada, A. Nakajima, a S. Aoki",1997,Comp.Biochem.Physiol.C 116(3):213-218,CCOP(=S)(NC(C)CC)OC1=CC(C)=CC=C1[N+]([O-])=O
36335-67-8,WB,7.01,Carassius auratus,FT,Cb/Cw,2.201397124,LogBCF (L/kg bdwt),FW,ArnotGobas,Relationships of Bioconcentration Factors of Organophosphate Pesticides Among Species of Fish,"Tsuda, T., M. Kojima, H. Harada, A. Nakajima, a S. Aoki",1997,Comp.Biochem.Physiol.C 116(3):213-218,CCOP(=S)(NC(C)CC)OC1=CC(C)=CC=C1[N+]([O-])=O
36335-67-8,WB,1,Oryzias latipes,FT,Cb/Cw,2.209515015,LogBCF (L/kg bdwt),FW,ArnotGobas,Relationships of Bioconcentration Factors of Organophosphate Pesticides Among Species of Fish,"Tsuda, T., M. Kojima, H. Harada, A. Nakajima, a S. Aoki",1997,Comp.Biochem.Physiol.C 116(3):213-218,CCOP(=S)(NC(C)CC)OC1=CC(C)=CC=C1[N+]([O-])=O
36335-67-8,WB,1,Tanichthys albonubes,FT,Cb/Cw,2.093421685,LogBCF (L/kg bdwt),FW,ArnotGobas,Relationships of Bioconcentration Factors of Organophosphate Pesticides Among Species of Fish,"Tsuda, T., M. Kojima, H. Harada, A. Nakajima, a S. Aoki",1997,Comp.Biochem.Physiol.C 116(3):213-218,CCOP(=S)(NC(C)CC)OC1=CC(C)=CC=C1[N+]([O-])=O
36335-67-8,WB,3,Tanichthys albonubes,FT,Cb/Cw,2.041392685,LogBCF (L/kg bdwt),FW,ArnotGobas,Relationships of Bioconcentration Factors of Organophosphate Pesticides Among Species of Fish,"Tsuda, T., M. Kojima, H. Harada, A. Nakajima, a S. Aoki",1997,Comp.Biochem.Physiol.C 116(3):213-218,CCOP(=S)(NC(C)CC)OC1=CC(C)=CC=C1[N+]([O-])=O
36734-19-7,WB,3,Cyprinus carpio,FT,Cb/Cw,2.748188027,LogBCF (L/kg bdwt),FW,ArnotGobas,Accumulation a Excretion of Pesticides Used in Golf-Courses by Carp (Cyprinus carpio) a Willow Shiner (Gnathopogon caerulescens).,"Tsuda, T., S. Aoki, M. Kojima, a T. Fujita",1992,Comp.Biochem.Physiol.C 101(1):63-66,CC(C)NC(=O)N1CC(=O)N(C1=O)C1=CC(Cl)=CC(Cl)=C1
36734-19-7,WB,10,Cyprinus carpio,FT,Cb/Cw,2.51851394,LogBCF (L/kg bdwt),FW,ArnotGobas,Accumulation a Excretion of Pesticides Used in Golf-Courses by Carp (Cyprinus carpio) a Willow Shiner (Gnathopogon caerulescens).,"Tsuda, T., S. Aoki, M. Kojima, a T. Fujita",1992,Comp.Biochem.Physiol.C 101(1):63-66,CC(C)NC(=O)N1CC(=O)N(C1=O)C1=CC(Cl)=CC(Cl)=C1
36734-19-7,WB,7,Cyprinus carpio,FT,Cb/Cw,2.477121255,LogBCF (L/kg bdwt),FW,ArnotGobas,Accumulation a Excretion of Pesticides Used in Golf-Courses by Carp (Cyprinus carpio) a Willow Shiner (Gnathopogon caerulescens).,"Tsuda, T., S. Aoki, M. Kojima, a T. Fujita",1992,Comp.Biochem.Physiol.C 101(1):63-66,CC(C)NC(=O)N1CC(=O)N(C1=O)C1=CC(Cl)=CC(Cl)=C1
36734-19-7,WB,14,Cyprinus carpio,FT,Cb/Cw,2.361727836,LogBCF (L/kg bdwt),FW,ArnotGobas,Accumulation a Excretion of Pesticides Used in Golf-Courses by Carp (Cyprinus carpio) a Willow Shiner (Gnathopogon caerulescens).,"Tsuda, T., S. Aoki, M. Kojima, a T. Fujita",1992,Comp.Biochem.Physiol.C 101(1):63-66,CC(C)NC(=O)N1CC(=O)N(C1=O)C1=CC(Cl)=CC(Cl)=C1
36734-19-7,WB,1,Cyprinus carpio,FT,Cb/Cw,2.041392685,LogBCF (L/kg bdwt),FW,ArnotGobas,Accumulation a Excretion of Pesticides Used in Golf-Courses by Carp (Cyprinus carpio) a Willow Shiner (Gnathopogon caerulescens).,"Tsuda, T., S. Aoki, M. Kojima, a T. Fujita",1992,Comp.Biochem.Physiol.C 101(1):63-66,CC(C)NC(=O)N1CC(=O)N(C1=O)C1=CC(Cl)=CC(Cl)=C1
3674-75-7,WB,36,Cyprinodon variegatus,FT,K1/K2,3.115943177,LogBCF (L/kg bdwt),SW,ArnotGobas,"Bioconcentration, biotransformation, a elimination of polycyclic aromatic hydrocarbons in sheepshead minnows (cyprinodon variegatus) exposed to contaminated seawater","Jonsson, G., Bechmann, R.K., Bamber, S.D. a Baussant, T.",2004,Environmental Toxicology a Chemistry 23(6):1538-1548,CCC1=CC2=CC=CC=C2C2=CC=CC=C12
3674-75-7,WB,36,Cyprinodon variegatus,FT,Cb/Cw,2.942008053,LogBCF (L/kg bdwt),SW,ArnotGobas,"Bioconcentration, biotransformation, a elimination of polycyclic aromatic hydrocarbons in sheepshead minnows (cyprinodon variegatus) exposed to contaminated seawater","Jonsson, G., Bechmann, R.K., Bamber, S.D. a Baussant, T.",2004,Environmental Toxicology a Chemistry 23(6):1538-1548,CCC1=CC2=CC=CC=C2C2=CC=CC=C12
3674-75-7,WB,36,Cyprinodon variegatus,FT,K1/K2,2.631443769,LogBCF (L/kg bdwt),SW,ArnotGobas,"Bioconcentration, biotransformation, a elimination of polycyclic aromatic hydrocarbons in sheepshead minnows (cyprinodon variegatus) exposed to contaminated seawater","Jonsson, G., Bechmann, R.K., Bamber, S.D. a Baussant, T.",2004,Environmental Toxicology a Chemistry 23(6):1538-1548,CCC1=CC2=CC=CC=C2C2=CC=CC=C12
3674-75-7,WB,36,Cyprinodon variegatus,FT,Cb/Cw,2.474216264,LogBCF (L/kg bdwt),SW,ArnotGobas,"Bioconcentration, biotransformation, a elimination of polycyclic aromatic hydrocarbons in sheepshead minnows (cyprinodon variegatus) exposed to contaminated seawater","Jonsson, G., Bechmann, R.K., Bamber, S.D. a Baussant, T.",2004,Environmental Toxicology a Chemistry 23(6):1538-1548,CCC1=CC2=CC=CC=C2C2=CC=CC=C12
37372-50-2,WB,56,Cyprinus carpio,FT,Cb/Cw,1.720051168,LogBCF (L/kg bdwt),FW,ArnotGobas,Biodegradation a Bioconcentration of Existing Chemical Substances uer the Chemical Substances Control Law,Chemicals Evaluation a Research Institute,1992,http://qsar.cerij.or.jp/cgi-bin/DEGACC/iex.cgie,CC1=CC(=CC=C1N=NC1=CC=C(N)C=C1N)C1=CC=C(N=NC2=C(C=C3C=C(C(N=NC4=CC=CC=C4)=C(O)C3=C2N)S(O)(=O)=O)S(O)(=O)=O)C(C)=C1
37372-50-2,WB,56,Cyprinus carpio,FT,Cb/Cw,1.176176972,LogBCF (L/kg bdwt),FW,ArnotGobas,Biodegradation a Bioconcentration of Existing Chemical Substances uer the Chemical Substances Control Law,Chemicals Evaluation a Research Institute,1992,http://qsar.cerij.or.jp/cgi-bin/DEGACC/iex.cgie,CC1=CC(=CC=C1N=NC1=CC=C(N)C=C1N)C1=CC=C(N=NC2=C(C=C3C=C(C(N=NC4=CC=CC=C4)=C(O)C3=C2N)S(O)(=O)=O)S(O)(=O)=O)C(C)=C1
3761-41-9,WB,3,Oryzias latipes,FT,Cb/Cw,0.301029996,LogBCF (L/kg bdwt),FW,ArnotGobas,"Accumulation a Excretion of Fenthion, Fenthion Sulfoxide a Fenthion Sulfone by Killifish (Oryzias latipes)","Tsuda, T., M. Kojima, H. Harada, A. Nakajima, a S. Aoki",1996,Comp.Biochem.Physiol.C 113(1):45-49,COP(=S)(OC)OC1=CC=C(C(C)=C1)S(C)=O
3761-41-9,WB,1,Oryzias latipes,FT,Cb/Cw,0.113943352,LogBCF (L/kg bdwt),FW,ArnotGobas,"Accumulation a Excretion of Fenthion, Fenthion Sulfoxide a Fenthion Sulfone by Killifish (Oryzias latipes)","Tsuda, T., M. Kojima, H. Harada, A. Nakajima, a S. Aoki",1996,Comp.Biochem.Physiol.C 113(1):45-49,COP(=S)(OC)OC1=CC=C(C(C)=C1)S(C)=O
3761-41-9,WB,6,Oryzias latipes,FT,Cb/Cw,0.079181246,LogBCF (L/kg bdwt),FW,ArnotGobas,"Accumulation a Excretion of Fenthion, Fenthion Sulfoxide a Fenthion Sulfone by Killifish (Oryzias latipes)","Tsuda, T., M. Kojima, H. Harada, A. Nakajima, a S. Aoki",1996,Comp.Biochem.Physiol.C 113(1):45-49,COP(=S)(OC)OC1=CC=C(C(C)=C1)S(C)=O
3761-41-9,WB,0.5,Oryzias latipes,FT,Cb/Cw,0.041392685,LogBCF (L/kg bdwt),FW,ArnotGobas,"Accumulation a Excretion of Fenthion, Fenthion Sulfoxide a Fenthion Sulfone by Killifish (Oryzias latipes)","Tsuda, T., M. Kojima, H. Harada, A. Nakajima, a S. Aoki",1996,Comp.Biochem.Physiol.C 113(1):45-49,COP(=S)(OC)OC1=CC=C(C(C)=C1)S(C)=O
3761-41-9,WB,2,Oryzias latipes,FT,Cb/Cw,0.041392685,LogBCF (L/kg bdwt),FW,ArnotGobas,"Accumulation a Excretion of Fenthion, Fenthion Sulfoxide a Fenthion Sulfone by Killifish (Oryzias latipes)","Tsuda, T., M. Kojima, H. Harada, A. Nakajima, a S. Aoki",1996,Comp.Biochem.Physiol.C 113(1):45-49,COP(=S)(OC)OC1=CC=C(C(C)=C1)S(C)=O
3761-42-0,WB,6,Oryzias latipes,FT,Cb/Cw,0.556302501,LogBCF (L/kg bdwt),FW,ArnotGobas,"Accumulation a Excretion of Fenthion, Fenthion Sulfoxide a Fenthion Sulfone by Killifish (Oryzias latipes)","Tsuda, T., M. Kojima, H. Harada, A. Nakajima, a S. Aoki",1996,Comp.Biochem.Physiol.C 113(1):45-49,COP(=S)(OC)OC1=CC=C(C(C)=C1)S(C)(=O)=O
3761-42-0,WB,2,Oryzias latipes,FT,Cb/Cw,0.51851394,LogBCF (L/kg bdwt),FW,ArnotGobas,"Accumulation a Excretion of Fenthion, Fenthion Sulfoxide a Fenthion Sulfone by Killifish (Oryzias latipes)","Tsuda, T., M. Kojima, H. Harada, A. Nakajima, a S. Aoki",1996,Comp.Biochem.Physiol.C 113(1):45-49,COP(=S)(OC)OC1=CC=C(C(C)=C1)S(C)(=O)=O
3761-42-0,WB,3,Oryzias latipes,FT,Cb/Cw,0.505149978,LogBCF (L/kg bdwt),FW,ArnotGobas,"Accumulation a Excretion of Fenthion, Fenthion Sulfoxide a Fenthion Sulfone by Killifish (Oryzias latipes)","Tsuda, T., M. Kojima, H. Harada, A. Nakajima, a S. Aoki",1996,Comp.Biochem.Physiol.C 113(1):45-49,COP(=S)(OC)OC1=CC=C(C(C)=C1)S(C)(=O)=O
3761-42-0,WB,1,Oryzias latipes,FT,Cb/Cw,0.447158031,LogBCF (L/kg bdwt),FW,ArnotGobas,"Accumulation a Excretion of Fenthion, Fenthion Sulfoxide a Fenthion Sulfone by Killifish (Oryzias latipes)","Tsuda, T., M. Kojima, H. Harada, A. Nakajima, a S. Aoki",1996,Comp.Biochem.Physiol.C 113(1):45-49,COP(=S)(OC)OC1=CC=C(C(C)=C1)S(C)(=O)=O
3761-42-0,WB,0.5,Oryzias latipes,FT,Cb/Cw,0.322219295,LogBCF (L/kg bdwt),FW,ArnotGobas,"Accumulation a Excretion of Fenthion, Fenthion Sulfoxide a Fenthion Sulfone by Killifish (Oryzias latipes)","Tsuda, T., M. Kojima, H. Harada, A. Nakajima, a S. Aoki",1996,Comp.Biochem.Physiol.C 113(1):45-49,COP(=S)(OC)OC1=CC=C(C(C)=C1)S(C)(=O)=O
3766-81-2,WB,42,Cyprinus carpio,FT,Cb/Cw,0.468829545,LogBCF (L/kg bdwt),,ArnotGobas,Biodegradation a Bioconcentration of Existing Chemical Substances uer the Chemical Substances Control Law,Chemicals Evaluation a Research Institute,1992,http://qsar.cerij.or.jp/cgi-bin/DEGACC/iex.cgie,CCC(C)C1=CC=CC=C1OC(=O)NC
3766-81-2,WB,42,Cyprinus carpio,FT,Cb/Cw,0.244380726,LogBCF (L/kg bdwt),,ArnotGobas,Biodegradation a Bioconcentration of Existing Chemical Substances uer the Chemical Substances Control Law,Chemicals Evaluation a Research Institute,1992,http://qsar.cerij.or.jp/cgi-bin/DEGACC/iex.cgie,CCC(C)C1=CC=CC=C1OC(=O)NC
3766-81-2,WB,7.5,Pseudorasbora parva,FT,Cb/Cw,1.414973348,LogBCF (L/kg bdwt),FW,ArnotGobas,Measurement of the Bioconcentration Factors of Pesticides by Freshwater Fish a Their Correlation with Physicochemical Properties or Acute Toxicities,"Kanazawa, J.",1981,Pestic.Sci. 12(4):417-424,CCC(C)C1=CC=CC=C1OC(=O)NC
37680-65-2,WB,75,Oncorhynchus mykiss,FT,Cb/Cw,4.230448921,LogBCF (L/kg bdwt),FW,ArnotGobas,Bioconcentration Factors of Some Halogenated Organics for Rainbow Trout: Limitations in Their Use for Prediction of Environmental Residues,"Oliver, B.G., a A.J. Niimi",1985,Environ.Sci.Technol. 19(9):842-849,ClC1=CC=C(Cl)C(=C1)C1=CC=CC=C1Cl
37680-65-2,WB,96,Oncorhynchus mykiss,FT,Cb/Cw,4.230448921,LogBCF (L/kg bdwt),FW,ArnotGobas,Bioconcentration Factors of Some Halogenated Organics for Rainbow Trout: Limitations in Their Use for Prediction of Environmental Residues,"Oliver, B.G., a A.J. Niimi",1985,Environ.Sci.Technol. 19(9):842-849,ClC1=CC=C(Cl)C(=C1)C1=CC=CC=C1Cl
37680-65-2,WB,30,Danio rerio,FT,K1/K2,4.11,LogBCF (L/kg bdwt),FW,ArnotGobas,Kinetics of Bioconcentration a Clearance of 28 Polychlorinated Biphenyl Congeners in Zebrafish (Brachydanio rerio),"Fox, K., G.P. Zauke, a W. Butte",1994,Ecotoxicol.Environ.Saf. 28(1):99-109,ClC1=CC=C(Cl)C(=C1)C1=CC=CC=C1Cl
37680-73-2,WB,30,Danio rerio,FT,K1/K2,5.47,LogBCF (L/kg bdwt),FW,ArnotGobas,Kinetics of Bioconcentration a Clearance of 28 Polychlorinated Biphenyl Congeners in Zebrafish (Brachydanio rerio),"Fox, K., G.P. Zauke, a W. Butte",1994,Ecotoxicol.Environ.Saf. 28(1):99-109,ClC1=CC=C(Cl)C(=C1)C1=CC(Cl)=C(Cl)C=C1Cl
3811-49-2,WB,3,Tanichthys albonubes,FT,Cb/Cw,1.298853076,LogBCF (L/kg bdwt),FW,ArnotGobas,Relationships of Bioconcentration Factors of Organophosphate Pesticides Among Species of Fish,"Tsuda, T., M. Kojima, H. Harada, A. Nakajima, a S. Aoki",1997,Comp.Biochem.Physiol.C 116(3):213-218,COP1(=S)OCC2=CC=CC=C2O1
3811-49-2,WB,5,Oryzias latipes,FT,Cb/Cw,1.399673721,LogBCF (L/kg bdwt),FW,ArnotGobas,Relationships of Bioconcentration Factors of Organophosphate Pesticides Among Species of Fish,"Tsuda, T., M. Kojima, H. Harada, A. Nakajima, a S. Aoki",1997,Comp.Biochem.Physiol.C 116(3):213-218,COP1(=S)OCC2=CC=CC=C2O1
3811-49-2,WB,3,Oryzias latipes,FT,Cb/Cw,1.320146286,LogBCF (L/kg bdwt),FW,ArnotGobas,Relationships of Bioconcentration Factors of Organophosphate Pesticides Among Species of Fish,"Tsuda, T., M. Kojima, H. Harada, A. Nakajima, a S. Aoki",1997,Comp.Biochem.Physiol.C 116(3):213-218,COP1(=S)OCC2=CC=CC=C2O1
3811-49-2,WB,7.01,Oryzias latipes,FT,Cb/Cw,1.309630167,LogBCF (L/kg bdwt),FW,ArnotGobas,Relationships of Bioconcentration Factors of Organophosphate Pesticides Among Species of Fish,"Tsuda, T., M. Kojima, H. Harada, A. Nakajima, a S. Aoki",1997,Comp.Biochem.Physiol.C 116(3):213-218,COP1(=S)OCC2=CC=CC=C2O1
3811-49-2,WB,0.5,Oryzias latipes,FT,Cb/Cw,1.29666519,LogBCF (L/kg bdwt),FW,ArnotGobas,Relationships of Bioconcentration Factors of Organophosphate Pesticides Among Species of Fish,"Tsuda, T., M. Kojima, H. Harada, A. Nakajima, a S. Aoki",1997,Comp.Biochem.Physiol.C 116(3):213-218,COP1(=S)OCC2=CC=CC=C2O1
3811-49-2,WB,3,Poecilia reticulata,FT,Cb/Cw,1.727541257,LogBCF (L/kg bdwt),FW,ArnotGobas,Relationships of Bioconcentration Factors of Organophosphate Pesticides Among Species of Fish,"Tsuda, T., M. Kojima, H. Harada, A. Nakajima, a S. Aoki",1997,Comp.Biochem.Physiol.C 116(3):213-218,COP1(=S)OCC2=CC=CC=C2O1
3811-49-2,WB,5,Poecilia reticulata,FT,Cb/Cw,1.716003344,LogBCF (L/kg bdwt),FW,ArnotGobas,Relationships of Bioconcentration Factors of Organophosphate Pesticides Among Species of Fish,"Tsuda, T., M. Kojima, H. Harada, A. Nakajima, a S. Aoki",1997,Comp.Biochem.Physiol.C 116(3):213-218,COP1(=S)OCC2=CC=CC=C2O1
3811-49-2,WB,0.5,Poecilia reticulata,FT,Cb/Cw,1.621176282,LogBCF (L/kg bdwt),FW,ArnotGobas,Relationships of Bioconcentration Factors of Organophosphate Pesticides Among Species of Fish,"Tsuda, T., M. Kojima, H. Harada, A. Nakajima, a S. Aoki",1997,Comp.Biochem.Physiol.C 116(3):213-218,COP1(=S)OCC2=CC=CC=C2O1
3811-49-2,WB,1,Tanichthys albonubes,FT,Cb/Cw,1.167317335,LogBCF (L/kg bdwt),FW,ArnotGobas,Relationships of Bioconcentration Factors of Organophosphate Pesticides Among Species of Fish,"Tsuda, T., M. Kojima, H. Harada, A. Nakajima, a S. Aoki",1997,Comp.Biochem.Physiol.C 116(3):213-218,COP1(=S)OCC2=CC=CC=C2O1
3811-49-2,WB,7.01,Poecilia reticulata,FT,Cb/Cw,1.605305046,LogBCF (L/kg bdwt),FW,ArnotGobas,Relationships of Bioconcentration Factors of Organophosphate Pesticides Among Species of Fish,"Tsuda, T., M. Kojima, H. Harada, A. Nakajima, a S. Aoki",1997,Comp.Biochem.Physiol.C 116(3):213-218,COP1(=S)OCC2=CC=CC=C2O1
3811-49-2,WB,0.5,Poecilia reticulata,FT,Cb/Cw,1.706717782,LogBCF (L/kg bdwt),FW,ArnotGobas,Relationships of Bioconcentration Factors of Organophosphate Pesticides Among Species of Fish,"Tsuda, T., M. Kojima, H. Harada, A. Nakajima, a S. Aoki",1997,Comp.Biochem.Physiol.C 116(3):213-218,COP1(=S)OCC2=CC=CC=C2O1
3811-49-2,WB,5,Poecilia reticulata,FT,Cb/Cw,1.673020907,LogBCF (L/kg bdwt),FW,ArnotGobas,Relationships of Bioconcentration Factors of Organophosphate Pesticides Among Species of Fish,"Tsuda, T., M. Kojima, H. Harada, A. Nakajima, a S. Aoki",1997,Comp.Biochem.Physiol.C 116(3):213-218,COP1(=S)OCC2=CC=CC=C2O1
3811-49-2,WB,0.25,Carassius auratus,FT,Cb/Cw,1.315970345,LogBCF (L/kg bdwt),FW,ArnotGobas,Relationships of Bioconcentration Factors of Organophosphate Pesticides Among Species of Fish,"Tsuda, T., M. Kojima, H. Harada, A. Nakajima, a S. Aoki",1997,Comp.Biochem.Physiol.C 116(3):213-218,COP1(=S)OCC2=CC=CC=C2O1
3811-49-2,WB,1,Oryzias latipes,FT,Cb/Cw,1.214843848,LogBCF (L/kg bdwt),FW,ArnotGobas,Relationships of Bioconcentration Factors of Organophosphate Pesticides Among Species of Fish,"Tsuda, T., M. Kojima, H. Harada, A. Nakajima, a S. Aoki",1997,Comp.Biochem.Physiol.C 116(3):213-218,COP1(=S)OCC2=CC=CC=C2O1
3811-49-2,WB,0.25,Poecilia reticulata,FT,Cb/Cw,1.505149978,LogBCF (L/kg bdwt),FW,ArnotGobas,Relationships of Bioconcentration Factors of Organophosphate Pesticides Among Species of Fish,"Tsuda, T., M. Kojima, H. Harada, A. Nakajima, a S. Aoki",1997,Comp.Biochem.Physiol.C 116(3):213-218,COP1(=S)OCC2=CC=CC=C2O1
3811-49-2,WB,3,Poecilia reticulata,FT,Cb/Cw,1.58546073,LogBCF (L/kg bdwt),FW,ArnotGobas,Relationships of Bioconcentration Factors of Organophosphate Pesticides Among Species of Fish,"Tsuda, T., M. Kojima, H. Harada, A. Nakajima, a S. Aoki",1997,Comp.Biochem.Physiol.C 116(3):213-218,COP1(=S)OCC2=CC=CC=C2O1
3811-49-2,WB,0.25,Poecilia reticulata,FT,Cb/Cw,1.563481085,LogBCF (L/kg bdwt),FW,ArnotGobas,Relationships of Bioconcentration Factors of Organophosphate Pesticides Among Species of Fish,"Tsuda, T., M. Kojima, H. Harada, A. Nakajima, a S. Aoki",1997,Comp.Biochem.Physiol.C 116(3):213-218,COP1(=S)OCC2=CC=CC=C2O1
3811-49-2,WB,1,Poecilia reticulata,FT,Cb/Cw,1.465382851,LogBCF (L/kg bdwt),FW,ArnotGobas,Relationships of Bioconcentration Factors of Organophosphate Pesticides Among Species of Fish,"Tsuda, T., M. Kojima, H. Harada, A. Nakajima, a S. Aoki",1997,Comp.Biochem.Physiol.C 116(3):213-218,COP1(=S)OCC2=CC=CC=C2O1
3811-49-2,WB,0.25,Oryzias latipes,FT,Cb/Cw,1.187520721,LogBCF (L/kg bdwt),FW,ArnotGobas,Relationships of Bioconcentration Factors of Organophosphate Pesticides Among Species of Fish,"Tsuda, T., M. Kojima, H. Harada, A. Nakajima, a S. Aoki",1997,Comp.Biochem.Physiol.C 116(3):213-218,COP1(=S)OCC2=CC=CC=C2O1
3811-49-2,WB,0.5,Tanichthys albonubes,FT,Cb/Cw,1.117271296,LogBCF (L/kg bdwt),FW,ArnotGobas,Relationships of Bioconcentration Factors of Organophosphate Pesticides Among Species of Fish,"Tsuda, T., M. Kojima, H. Harada, A. Nakajima, a S. Aoki",1997,Comp.Biochem.Physiol.C 116(3):213-218,COP1(=S)OCC2=CC=CC=C2O1
3811-49-2,WB,1,Poecilia reticulata,FT,Cb/Cw,1.389166084,LogBCF (L/kg bdwt),FW,ArnotGobas,Relationships of Bioconcentration Factors of Organophosphate Pesticides Among Species of Fish,"Tsuda, T., M. Kojima, H. Harada, A. Nakajima, a S. Aoki",1997,Comp.Biochem.Physiol.C 116(3):213-218,COP1(=S)OCC2=CC=CC=C2O1
3811-49-2,WB,0.5,Carassius auratus,FT,Cb/Cw,1.130333768,LogBCF (L/kg bdwt),FW,ArnotGobas,Relationships of Bioconcentration Factors of Organophosphate Pesticides Among Species of Fish,"Tsuda, T., M. Kojima, H. Harada, A. Nakajima, a S. Aoki",1997,Comp.Biochem.Physiol.C 116(3):213-218,COP1(=S)OCC2=CC=CC=C2O1
3811-49-2,WB,5,Carassius auratus,FT,Cb/Cw,1.10720997,LogBCF (L/kg bdwt),FW,ArnotGobas,Relationships of Bioconcentration Factors of Organophosphate Pesticides Among Species of Fish,"Tsuda, T., M. Kojima, H. Harada, A. Nakajima, a S. Aoki",1997,Comp.Biochem.Physiol.C 116(3):213-218,COP1(=S)OCC2=CC=CC=C2O1
3811-49-2,WB,7.01,Poecilia reticulata,FT,Cb/Cw,1.318063335,LogBCF (L/kg bdwt),FW,ArnotGobas,Relationships of Bioconcentration Factors of Organophosphate Pesticides Among Species of Fish,"Tsuda, T., M. Kojima, H. Harada, A. Nakajima, a S. Aoki",1997,Comp.Biochem.Physiol.C 116(3):213-218,COP1(=S)OCC2=CC=CC=C2O1
3811-49-2,WB,3,Carassius auratus,FT,Cb/Cw,1.053078443,LogBCF (L/kg bdwt),FW,ArnotGobas,Relationships of Bioconcentration Factors of Organophosphate Pesticides Among Species of Fish,"Tsuda, T., M. Kojima, H. Harada, A. Nakajima, a S. Aoki",1997,Comp.Biochem.Physiol.C 116(3):213-218,COP1(=S)OCC2=CC=CC=C2O1
3811-49-2,WB,0.25,Tanichthys albonubes,FT,Cb/Cw,1.029383778,LogBCF (L/kg bdwt),FW,ArnotGobas,Relationships of Bioconcentration Factors of Organophosphate Pesticides Among Species of Fish,"Tsuda, T., M. Kojima, H. Harada, A. Nakajima, a S. Aoki",1997,Comp.Biochem.Physiol.C 116(3):213-218,COP1(=S)OCC2=CC=CC=C2O1
3811-49-2,WB,7.01,Carassius auratus,FT,Cb/Cw,1,LogBCF (L/kg bdwt),FW,ArnotGobas,Relationships of Bioconcentration Factors of Organophosphate Pesticides Among Species of Fish,"Tsuda, T., M. Kojima, H. Harada, A. Nakajima, a S. Aoki",1997,Comp.Biochem.Physiol.C 116(3):213-218,COP1(=S)OCC2=CC=CC=C2O1
3811-49-2,WB,1,Carassius auratus,FT,Cb/Cw,0.944482672,LogBCF (L/kg bdwt),FW,ArnotGobas,Relationships of Bioconcentration Factors of Organophosphate Pesticides Among Species of Fish,"Tsuda, T., M. Kojima, H. Harada, A. Nakajima, a S. Aoki",1997,Comp.Biochem.Physiol.C 116(3):213-218,COP1(=S)OCC2=CC=CC=C2O1
3811-49-2,WB,1,Cyprinus carpio,FT,Cb/Cw,0.995635195,LogBCF (L/kg bdwt),FW,ArnotGobas,Accumulation a Excretion of Organophosphorous Pesticides by Carp Cyprinus carpio,"Tsuda, T., S. Aoki, M. Kojima, a T. Fujita",1993,Comp.Biochem.Physiol.C 104(2):275-278,COP1(=S)OCC2=CC=CC=C2O1
3811-49-2,WB,7.01,Cyprinus carpio,FT,Cb/Cw,0.886490725,LogBCF (L/kg bdwt),FW,ArnotGobas,Accumulation a Excretion of Organophosphorous Pesticides by Carp Cyprinus carpio,"Tsuda, T., S. Aoki, M. Kojima, a T. Fujita",1993,Comp.Biochem.Physiol.C 104(2):275-278,COP1(=S)OCC2=CC=CC=C2O1
3811-49-2,WB,3,Cyprinus carpio,FT,Cb/Cw,0.86923172,LogBCF (L/kg bdwt),FW,ArnotGobas,Accumulation a Excretion of Organophosphorous Pesticides by Carp Cyprinus carpio,"Tsuda, T., S. Aoki, M. Kojima, a T. Fujita",1993,Comp.Biochem.Physiol.C 104(2):275-278,COP1(=S)OCC2=CC=CC=C2O1
3811-49-2,WB,5,Cyprinus carpio,FT,Cb/Cw,0.653212514,LogBCF (L/kg bdwt),FW,ArnotGobas,Accumulation a Excretion of Organophosphorous Pesticides by Carp Cyprinus carpio,"Tsuda, T., S. Aoki, M. Kojima, a T. Fujita",1993,Comp.Biochem.Physiol.C 104(2):275-278,COP1(=S)OCC2=CC=CC=C2O1
38380-07-3,WB,30,Danio rerio,FT,K1/K2,5.77,LogBCF (L/kg bdwt),FW,ArnotGobas,Kinetics of Bioconcentration a Clearance of 28 Polychlorinated Biphenyl Congeners in Zebrafish (Brachydanio rerio),"Fox, K., G.P. Zauke, a W. Butte",1994,Ecotoxicol.Environ.Saf. 28(1):99-109,ClC1=CC=C(C(Cl)=C1Cl)C1=CC=C(Cl)C(Cl)=C1Cl
38411-22-2,WB,30,Danio rerio,FT,K1/K2,5.43,LogBCF (L/kg bdwt),FW,ArnotGobas,Kinetics of Bioconcentration a Clearance of 28 Polychlorinated Biphenyl Congeners in Zebrafish (Brachydanio rerio),"Fox, K., G.P. Zauke, a W. Butte",1994,Ecotoxicol.Environ.Saf. 28(1):99-109,ClC1=CC=C(Cl)C(=C1Cl)C1=C(Cl)C=CC(Cl)=C1Cl
38444-93-8,WB,75,Oncorhynchus mykiss,FT,Cb/Cw,4.230448921,LogBCF (L/kg bdwt),FW,ArnotGobas,Bioconcentration Factors of Some Halogenated Organics for Rainbow Trout: Limitations in Their Use for Prediction of Environmental Residues,"Oliver, B.G., a A.J. Niimi",1985,Environ.Sci.Technol. 19(9):842-849,ClC1=CC=CC(=C1Cl)C1=CC=CC(Cl)=C1Cl
38444-93-8,WB,96,Oncorhynchus mykiss,FT,Cb/Cw,4.230448921,LogBCF (L/kg bdwt),FW,ArnotGobas,Bioconcentration Factors of Some Halogenated Organics for Rainbow Trout: Limitations in Their Use for Prediction of Environmental Residues,"Oliver, B.G., a A.J. Niimi",1985,Environ.Sci.Technol. 19(9):842-849,ClC1=CC=CC(=C1Cl)C1=CC=CC(Cl)=C1Cl
38640-62-9,WB,60,Cyprinus carpio,FT,Cb/Cw,3.161368002,LogBCF (L/kg bdwt),FW,ArnotGobas,Biodegradation a Bioconcentration of Existing Chemical Substances uer the Chemical Substances Control Law,National Institute of Technology a Evaluation,2005,http://www.nite.go.jp/iex-e.html,CC(C)C1=CC=C2C=CC=CC2=C1C(C)C
38640-62-9,WB,60,Cyprinus carpio,FT,Cb/Cw,3.707570176,LogBCF (L/kg bdwt),FW,ArnotGobas,Biodegradation a Bioconcentration of Existing Chemical Substances uer the Chemical Substances Control Law,National Institute of Technology a Evaluation,2005,http://www.nite.go.jp/iex-e.html,CC(C)C1=CC=C2C=CC=CC2=C1C(C)C
38640-62-9,WB,60,Cyprinus carpio,FT,Cb/Cw,3.447158031,LogBCF (L/kg bdwt),FW,ArnotGobas,Biodegradation a Bioconcentration of Existing Chemical Substances uer the Chemical Substances Control Law,National Institute of Technology a Evaluation,2005,http://www.nite.go.jp/iex-e.html,CC(C)C1=CC=C2C=CC=CC2=C1C(C)C
38640-62-9,WB,60,Cyprinus carpio,FT,Cb/Cw,3.380211242,LogBCF (L/kg bdwt),FW,ArnotGobas,Biodegradation a Bioconcentration of Existing Chemical Substances uer the Chemical Substances Control Law,National Institute of Technology a Evaluation,2005,http://www.nite.go.jp/iex-e.html,CC(C)C1=CC=C2C=CC=CC2=C1C(C)C
39227-58-2,WB,8,Poecilia reticulata,FT,Cb/Cw,2.82,LogBCF (L/kg bdwt),FW,ArnotGobas,Bioaccumulation of Some Polychlorinated Dibenzo-p-Dioxins a Octachlorodibenzofuran in the Guppy (Poecilia reticulata),"Gobas, F.A.P.C., a S.M. Schrap",1990,Chemosphere 20(5):495-512,ClC1=CC(Cl)=C2OC3=CC=CC=C3OC2=C1Cl
40186-72-9,WB,30,Danio rerio,FT,K1/K2,5.71,LogBCF (L/kg bdwt),FW,ArnotGobas,Kinetics of Bioconcentration a Clearance of 28 Polychlorinated Biphenyl Congeners in Zebrafish (Brachydanio rerio),"Fox, K., G.P. Zauke, a W. Butte",1994,Ecotoxicol.Environ.Saf. 28(1):99-109,ClC1=CC(=C(Cl)C(Cl)=C1Cl)C1=C(Cl)C(Cl)=C(Cl)C(Cl)=C1Cl
4101-68-2,WB,56,Cyprinus carpio,FT,Cb/Cw,2.328301052,LogBCF (L/kg bdwt),,ArnotGobas,Biodegradation a Bioconcentration of Existing Chemical Substances uer the Chemical Substances Control Law,Chemicals Evaluation a Research Institute,1992,http://qsar.cerij.or.jp/cgi-bin/DEGACC/iex.cgie,BrCCCCCCCCCCBr
4101-68-2,WB,56,Cyprinus carpio,FT,Cb/Cw,1.775153616,LogBCF (L/kg bdwt),,ArnotGobas,Biodegradation a Bioconcentration of Existing Chemical Substances uer the Chemical Substances Control Law,Chemicals Evaluation a Research Institute,1992,http://qsar.cerij.or.jp/cgi-bin/DEGACC/iex.cgie,BrCCCCCCCCCCBr
41122-70-7,WB,56,Cyprinus carpio,FT,Cb/Cw,3.588318956,LogBCF (L/kg bdwt),,ArnotGobas,Biodegradation a Bioconcentration of Existing Chemical Substances uer the Chemical Substances Control Law,Chemicals Evaluation a Research Institute,1992,http://qsar.cerij.or.jp/cgi-bin/DEGACC/iex.cgie,CCCCCCC1=CC=C(C=C1)C1=CC=C(C=C1)C#N
41122-70-7,WB,56,Cyprinus carpio,FT,Cb/Cw,3.518252748,LogBCF (L/kg bdwt),,ArnotGobas,Biodegradation a Bioconcentration of Existing Chemical Substances uer the Chemical Substances Control Law,Chemicals Evaluation a Research Institute,1992,http://qsar.cerij.or.jp/cgi-bin/DEGACC/iex.cgie,CCCCCCC1=CC=C(C=C1)C1=CC=C(C=C1)C#N
41464-39-5,WB,30,Danio rerio,FT,K1/K2,4.84,LogBCF (L/kg bdwt),FW,ArnotGobas,Kinetics of Bioconcentration a Clearance of 28 Polychlorinated Biphenyl Congeners in Zebrafish (Brachydanio rerio),"Fox, K., G.P. Zauke, a W. Butte",1994,Ecotoxicol.Environ.Saf. 28(1):99-109,ClC1=CC=C(Cl)C(=C1)C1=CC=CC(Cl)=C1Cl
41464-40-8,WB,30,Danio rerio,FT,K1/K2,4.84,LogBCF (L/kg bdwt),FW,ArnotGobas,Kinetics of Bioconcentration a Clearance of 28 Polychlorinated Biphenyl Congeners in Zebrafish (Brachydanio rerio),"Fox, K., G.P. Zauke, a W. Butte",1994,Ecotoxicol.Environ.Saf. 28(1):99-109,ClC1=CC=C(C(Cl)=C1)C1=CC(Cl)=CC=C1Cl
41464-51-1,WB,30,Danio rerio,FT,K1/K2,5.43,LogBCF (L/kg bdwt),FW,ArnotGobas,Kinetics of Bioconcentration a Clearance of 28 Polychlorinated Biphenyl Congeners in Zebrafish (Brachydanio rerio),"Fox, K., G.P. Zauke, a W. Butte",1994,Ecotoxicol.Environ.Saf. 28(1):99-109,ClC1=CC=CC(=C1Cl)C1=CC(Cl)=C(Cl)C=C1Cl
42240-73-3,WB,56,Cyprinus carpio,FT,Cb/Cw,3.430362689,LogBCF (L/kg bdwt),,ArnotGobas,Biodegradation a Bioconcentration of Existing Chemical Substances uer the Chemical Substances Control Law,Chemicals Evaluation a Research Institute,1992,http://qsar.cerij.or.jp/cgi-bin/DEGACC/iex.cgie,NC1=CC=C(CC2=CC=C(N)C(Cl)=C2Cl)C(Cl)=C1Cl
42240-73-3,WB,56,Cyprinus carpio,FT,Cb/Cw,3.110849484,LogBCF (L/kg bdwt),,ArnotGobas,Biodegradation a Bioconcentration of Existing Chemical Substances uer the Chemical Substances Control Law,Chemicals Evaluation a Research Institute,1992,http://qsar.cerij.or.jp/cgi-bin/DEGACC/iex.cgie,NC1=CC=C(CC2=CC=C(N)C(Cl)=C2Cl)C(Cl)=C1Cl
127-27-5,WB,20,Oncorhynchus mykiss,FT,Cb/Cw,1.653212514,LogBCF (L/kg bdwt),FW,ArnotGobas,Free a Conjugated Concentrations of Nine Resin Acids in Rainbow Trout (Oncorhynchus mykiss) Following Waterborne Exposure,"Niimi, A.J., a H.B. Lee",1992,Environ.Toxicol.Chem. 11(10):1403-1407,CC1(CCC2C(CCC3C2(C)CCCC3(C)C(O)=O)=C1)C=C
127-27-5,WB,14,Oncorhynchus mykiss,FT,Cb/Cw,1.69019608,LogBCF (L/kg bdwt),FW,ArnotGobas,Free a Conjugated Concentrations of Nine Resin Acids in Rainbow Trout (Oncorhynchus mykiss) Following Waterborne Exposure,"Niimi, A.J., a H.B. Lee",1992,Environ.Toxicol.Chem. 11(10):1403-1407,CC1(CCC2C(CCC3C2(C)CCCC3(C)C(O)=O)=C1)C=C
471-77-2,WB,14,Oncorhynchus mykiss,FT,Cb/Cw,2.08278537,LogBCF (L/kg bdwt),FW,ArnotGobas,Free a Conjugated Concentrations of Nine Resin Acids in Rainbow Trout (Oncorhynchus mykiss) Following Waterborne Exposure,"Niimi, A.J., a H.B. Lee",1992,Environ.Toxicol.Chem. 11(10):1403-1407,CC(C)=C1CCC2C(CCC3C2(C)CCCC3(C)C(O)=O)=C1
471-77-2,WB,20,Oncorhynchus mykiss,FT,Cb/Cw,2.11058971,LogBCF (L/kg bdwt),FW,ArnotGobas,Free a Conjugated Concentrations of Nine Resin Acids in Rainbow Trout (Oncorhynchus mykiss) Following Waterborne Exposure,"Niimi, A.J., a H.B. Lee",1992,Environ.Toxicol.Chem. 11(10):1403-1407,CC(C)=C1CCC2C(CCC3C2(C)CCCC3(C)C(O)=O)=C1
4821-19-6,WB,56,Cyprinus carpio,FT,Cb/Cw,3.018908444,LogBCF (L/kg bdwt),,ArnotGobas,Biodegradation a Bioconcentration of Existing Chemical Substances uer the Chemical Substances Control Law,National Institute of Technology a Evaluation,2005,http://www.nite.go.jp/iex-e.html,OC1=C(C=CC=C1C1CCCCC1)C1CCCCC1
4821-19-6,WB,56,Cyprinus carpio,FT,Cb/Cw,2.890421019,LogBCF (L/kg bdwt),,ArnotGobas,Biodegradation a Bioconcentration of Existing Chemical Substances uer the Chemical Substances Control Law,National Institute of Technology a Evaluation,2005,http://www.nite.go.jp/iex-e.html,OC1=C(C=CC=C1C1CCCCC1)C1CCCCC1
4883-72-1,WB,42,Cyprinus carpio,FT,Cb/Cw,0.62,LogBCF (L/kg bdwt),,ArnotGobas,Biodegradation a Bioconcentration of Existing Chemical Substances uer the Chemical Substances Control Law,Chemicals Evaluation a Research Institute,1992,http://qsar.cerij.or.jp/cgi-bin/DEGACC/iex.cgie,ON(N=O)C1CCCCC1
4883-72-1,WB,42,Cyprinus carpio,FT,Cb/Cw,0.020433968,LogBCF (L/kg bdwt),,ArnotGobas,Biodegradation a Bioconcentration of Existing Chemical Substances uer the Chemical Substances Control Law,Chemicals Evaluation a Research Institute,1992,http://qsar.cerij.or.jp/cgi-bin/DEGACC/iex.cgie,ON(N=O)C1CCCCC1
4901-51-3,WB,28,Jordanella floridae,FT,BIOFAC,2.152288344,LogBCF (L/kg bdwt),FW,ArnotGobas,"Bioconcentration Kinetics of Some Chlorinated Benzenes a Chlorinated Phenols in American Flagfish, Jordanella floridae (Goode a Bean)","Smith, A.D., A. Bharath, C. Mallard, D. Orr, L.S. McCarty, a G.W. Ozburn",1990,Chemosphere 20(3-4):379-386,OC1=CC(Cl)=C(Cl)C(Cl)=C1Cl
4904-61-4,WB,70,Cyprinus carpio,FT,Cb/Cw,3.922206277,LogBCF (L/kg bdwt),,ArnotGobas,Biodegradation a Bioconcentration of Existing Chemical Substances uer the Chemical Substances Control Law,Chemicals Evaluation a Research Institute,1992,http://qsar.cerij.or.jp/cgi-bin/DEGACC/iex.cgie,C1CC=CCCC=CCCC=C1
4904-61-4,WB,70,Cyprinus carpio,FT,Cb/Cw,3.878808932,LogBCF (L/kg bdwt),,ArnotGobas,Biodegradation a Bioconcentration of Existing Chemical Substances uer the Chemical Substances Control Law,Chemicals Evaluation a Research Institute,1992,http://qsar.cerij.or.jp/cgi-bin/DEGACC/iex.cgie,C1CC=CCCC=CCCC=C1
50-29-3,WB,70,Cyprinus carpio,FT,Cb/Cw,4.203848464,LogBCF (L/kg bdwt),FW,ArnotGobas,Biodegradation a Bioconcentration of Existing Chemical Substances uer the Chemical Substances Control Law,Chemicals Evaluation a Research Institute,1992,http://qsar.cerij.or.jp/cgi-bin/DEGACC/iex.cgie,ClC1=CC=C(C=C1)C(C1=CC=C(Cl)C=C1)C(Cl)(Cl)Cl
50-29-3,WB,70,Cyprinus carpio,FT,Cb/Cw,4.16879202,LogBCF (L/kg bdwt),FW,ArnotGobas,Biodegradation a Bioconcentration of Existing Chemical Substances uer the Chemical Substances Control Law,Chemicals Evaluation a Research Institute,1992,http://qsar.cerij.or.jp/cgi-bin/DEGACC/iex.cgie,ClC1=CC=C(C=C1)C(C1=CC=C(Cl)C=C1)C(Cl)(Cl)Cl
50-29-3,WB,90,Salvelinus namaycush,FT,Cb/Cw,4.722222464,LogBCF (L/kg bdwt),FW,ArnotGobas,Dieldrin a DDT: Accumulation From Water a Food by Lake Trout (Salvelinus namaycush) in the Laboratory,"Reinert, R.E., L.J. Stone, a H.L. Bergman",1974,Proc.17th Conf.Great Lakes Res .:52-58,ClC1=CC=C(C=C1)C(C1=CC=C(Cl)C=C1)C(Cl)(Cl)Cl
50-29-3,WB,152,Salvelinus namaycush,FT,Cb/Cw,4.655618584,LogBCF (L/kg bdwt),FW,ArnotGobas,Dieldrin a DDT: Accumulation From Water a Food by Lake Trout (Salvelinus namaycush) in the Laboratory,"Reinert, R.E., L.J. Stone, a H.L. Bergman",1974,Proc.17th Conf.Great Lakes Res .:52-58,ClC1=CC=C(C=C1)C(C1=CC=C(Cl)C=C1)C(Cl)(Cl)Cl
50-29-3,WB,120,Salvelinus namaycush,FT,Cb/Cw,4.646266456,LogBCF (L/kg bdwt),FW,ArnotGobas,Dieldrin a DDT: Accumulation From Water a Food by Lake Trout (Salvelinus namaycush) in the Laboratory,"Reinert, R.E., L.J. Stone, a H.L. Bergman",1974,Proc.17th Conf.Great Lakes Res .:52-58,ClC1=CC=C(C=C1)C(C1=CC=C(Cl)C=C1)C(Cl)(Cl)Cl
50-29-3,WB,4,Oncorhynchus mykiss,FT,K1/K2,4.959041392,LogBCF (L/kg bdwt),FW,ArnotGobas,"Bioconcentration of Pyrethroid Insecticides a DDT by Rainbow Trout: Uptake, Depuration, a Effect of Dissolved Organic Carbon","Muir, D.C.G., B.R. Hobden, a M.R. Servos",1994,Aquat.Toxicol. 29(3/4):223-240,ClC1=CC=C(C=C1)C(C1=CC=C(Cl)C=C1)C(Cl)(Cl)Cl
50-29-3,WB,4,Oncorhynchus mykiss,FT,K1/K2,4.912753304,LogBCF (L/kg bdwt),FW,ArnotGobas,"Bioconcentration of Pyrethroid Insecticides a DDT by Rainbow Trout: Uptake, Depuration, a Effect of Dissolved Organic Carbon","Muir, D.C.G., B.R. Hobden, a M.R. Servos",1994,Aquat.Toxicol. 29(3/4):223-240,ClC1=CC=C(C=C1)C(C1=CC=C(Cl)C=C1)C(Cl)(Cl)Cl
50-29-3,WB,4,Oncorhynchus mykiss,FT,K1/K2,4.77815125,LogBCF (L/kg bdwt),FW,ArnotGobas,"Bioconcentration of Pyrethroid Insecticides a DDT by Rainbow Trout: Uptake, Depuration, a Effect of Dissolved Organic Carbon","Muir, D.C.G., B.R. Hobden, a M.R. Servos",1994,Aquat.Toxicol. 29(3/4):223-240,ClC1=CC=C(C=C1)C(C1=CC=C(Cl)C=C1)C(Cl)(Cl)Cl
50-29-3,WB,4,Oncorhynchus mykiss,FT,K1/K2,4.713490543,LogBCF (L/kg bdwt),FW,ArnotGobas,"Bioconcentration of Pyrethroid Insecticides a DDT by Rainbow Trout: Uptake, Depuration, a Effect of Dissolved Organic Carbon","Muir, D.C.G., B.R. Hobden, a M.R. Servos",1994,Aquat.Toxicol. 29(3/4):223-240,ClC1=CC=C(C=C1)C(C1=CC=C(Cl)C=C1)C(Cl)(Cl)Cl
50-29-3,WB,4,Oncorhynchus mykiss,FT,K1/K2,4.542825427,LogBCF (L/kg bdwt),FW,ArnotGobas,"Bioconcentration of Pyrethroid Insecticides a DDT by Rainbow Trout: Uptake, Depuration, a Effect of Dissolved Organic Carbon","Muir, D.C.G., B.R. Hobden, a M.R. Servos",1994,Aquat.Toxicol. 29(3/4):223-240,ClC1=CC=C(C=C1)C(C1=CC=C(Cl)C=C1)C(Cl)(Cl)Cl
50-29-3,WB,4,Oncorhynchus mykiss,FT,K1/K2,4.527629901,LogBCF (L/kg bdwt),FW,ArnotGobas,"Bioconcentration of Pyrethroid Insecticides a DDT by Rainbow Trout: Uptake, Depuration, a Effect of Dissolved Organic Carbon","Muir, D.C.G., B.R. Hobden, a M.R. Servos",1994,Aquat.Toxicol. 29(3/4):223-240,ClC1=CC=C(C=C1)C(C1=CC=C(Cl)C=C1)C(Cl)(Cl)Cl
50-30-6,WB,42,Cyprinus carpio,FT,Cb/Cw,0.255272505,LogBCF (L/kg bdwt),,ArnotGobas,Biodegradation a Bioconcentration of Existing Chemical Substances uer the Chemical Substances Control Law,National Institute of Technology a Evaluation,2005,http://www.nite.go.jp/iex-e.html,OC(=O)C1=C(Cl)C=CC=C1Cl
50-30-6,WB,42,Cyprinus carpio,FT,Cb/Cw,-0.698970004,LogBCF (L/kg bdwt),,ArnotGobas,Biodegradation a Bioconcentration of Existing Chemical Substances uer the Chemical Substances Control Law,National Institute of Technology a Evaluation,2005,http://www.nite.go.jp/iex-e.html,OC(=O)C1=C(Cl)C=CC=C1Cl
50-31-7,WB,42,Cyprinus carpio,FT,Cb/Cw,0.54,LogBCF (L/kg bdwt),,ArnotGobas,Biodegradation a Bioconcentration of Existing Chemical Substances uer the Chemical Substances Control Law,Chemicals Evaluation a Research Institute,1992,http://qsar.cerij.or.jp/cgi-bin/DEGACC/iex.cgie,OC(=O)C1=C(Cl)C=CC(Cl)=C1Cl
50-32-8,WB,2,Lepomis macrochirus,FT,K1/K2,2.925333056,LogBCF (L/kg bdwt),FW,ArnotGobas,"Effects of Feeding a Temperature on Uptake, Elimination a Metabolism of Benzo(a)pyrene in the Bluegill Sunfish (Lepomis macrochirus)","Jimenez, B.D., C.P. Cirmo, a J.F. McCarthy",1987,Aquat.Toxicol. 10(1):41-57,C1=CC=C2C(=C1)C=C1C=CC3=CC=CC4=CC=C2C1=C34
50-32-8,WB,2,Lepomis macrochirus,FT,K1/K2,2.57634135,LogBCF (L/kg bdwt),FW,ArnotGobas,"Effects of Feeding a Temperature on Uptake, Elimination a Metabolism of Benzo(a)pyrene in the Bluegill Sunfish (Lepomis macrochirus)","Jimenez, B.D., C.P. Cirmo, a J.F. McCarthy",1987,Aquat.Toxicol. 10(1):41-57,C1=CC=C2C(=C1)C=C1C=CC3=CC=CC4=CC=C2C1=C34
50-32-8,WB,0.17,Lepomis macrochirus,S,K1/K2,2.731588765,LogBCF (L/kg bdwt),FW,ArnotGobas,"Uptake, Depuration a Biotransformation of Anthracene a Benzo-a-pyrene in Bluegill Sunfish.","Spacie, A., P. F. Larum, a G. J. Leversee",1983,Ecotox. Env. Saf. 7:330-341,C1=CC=C2C(=C1)C=C1C=CC3=CC=CC4=CC=C2C1=C34
50512-35-1,WB,1,Oryzias latipes,FT,Cb/Cw,1.73239376,LogBCF (L/kg bdwt),FW,ArnotGobas,"Acute Toxicity, Accumulation a Excretion of Isoprothiolane a Its Degradation Products in Killifish","Tsuda, T., M. Kojima, H. Harada, A. Nakajima, a S. Aoki",1997,Water Res. 31(2):323-327,CC(C)OC(=O)C(C(=O)OC(C)C)=C1SCCS1
50512-35-1,WB,0.5,Oryzias latipes,FT,Cb/Cw,1.672097858,LogBCF (L/kg bdwt),FW,ArnotGobas,"Acute Toxicity, Accumulation a Excretion of Isoprothiolane a Its Degradation Products in Killifish","Tsuda, T., M. Kojima, H. Harada, A. Nakajima, a S. Aoki",1997,Water Res. 31(2):323-327,CC(C)OC(=O)C(C(=O)OC(C)C)=C1SCCS1
50512-35-1,WB,3,Oryzias latipes,FT,Cb/Cw,1.643452676,LogBCF (L/kg bdwt),FW,ArnotGobas,"Acute Toxicity, Accumulation a Excretion of Isoprothiolane a Its Degradation Products in Killifish","Tsuda, T., M. Kojima, H. Harada, A. Nakajima, a S. Aoki",1997,Water Res. 31(2):323-327,CC(C)OC(=O)C(C(=O)OC(C)C)=C1SCCS1
50512-35-1,WB,1,Oryzias latipes,FT,Cb/Cw,1.643452676,LogBCF (L/kg bdwt),FW,ArnotGobas,"Acute Toxicity, Accumulation a Excretion of Isoprothiolane a Its Degradation Products in Killifish","Tsuda, T., M. Kojima, H. Harada, A. Nakajima, a S. Aoki",1997,Water Res. 31(2):323-327,CC(C)OC(=O)C(C(=O)OC(C)C)=C1SCCS1
50512-35-1,WB,2,Oryzias latipes,FT,Cb/Cw,1.633468456,LogBCF (L/kg bdwt),FW,ArnotGobas,"Acute Toxicity, Accumulation a Excretion of Isoprothiolane a Its Degradation Products in Killifish","Tsuda, T., M. Kojima, H. Harada, A. Nakajima, a S. Aoki",1997,Water Res. 31(2):323-327,CC(C)OC(=O)C(C(=O)OC(C)C)=C1SCCS1
50512-35-1,WB,2,Oryzias latipes,FT,Cb/Cw,1.62324929,LogBCF (L/kg bdwt),FW,ArnotGobas,"Acute Toxicity, Accumulation a Excretion of Isoprothiolane a Its Degradation Products in Killifish","Tsuda, T., M. Kojima, H. Harada, A. Nakajima, a S. Aoki",1997,Water Res. 31(2):323-327,CC(C)OC(=O)C(C(=O)OC(C)C)=C1SCCS1
50512-35-1,WB,5,Oryzias latipes,FT,Cb/Cw,1.62324929,LogBCF (L/kg bdwt),FW,ArnotGobas,"Acute Toxicity, Accumulation a Excretion of Isoprothiolane a Its Degradation Products in Killifish","Tsuda, T., M. Kojima, H. Harada, A. Nakajima, a S. Aoki",1997,Water Res. 31(2):323-327,CC(C)OC(=O)C(C(=O)OC(C)C)=C1SCCS1
50512-35-1,WB,3,Oryzias latipes,FT,Cb/Cw,1.602059991,LogBCF (L/kg bdwt),FW,ArnotGobas,"Acute Toxicity, Accumulation a Excretion of Isoprothiolane a Its Degradation Products in Killifish","Tsuda, T., M. Kojima, H. Harada, A. Nakajima, a S. Aoki",1997,Water Res. 31(2):323-327,CC(C)OC(=O)C(C(=O)OC(C)C)=C1SCCS1
50512-35-1,WB,5,Oryzias latipes,FT,Cb/Cw,1.591064607,LogBCF (L/kg bdwt),FW,ArnotGobas,"Acute Toxicity, Accumulation a Excretion of Isoprothiolane a Its Degradation Products in Killifish","Tsuda, T., M. Kojima, H. Harada, A. Nakajima, a S. Aoki",1997,Water Res. 31(2):323-327,CC(C)OC(=O)C(C(=O)OC(C)C)=C1SCCS1
50512-35-1,WB,0.5,Oryzias latipes,FT,Cb/Cw,1.51851394,LogBCF (L/kg bdwt),FW,ArnotGobas,"Acute Toxicity, Accumulation a Excretion of Isoprothiolane a Its Degradation Products in Killifish","Tsuda, T., M. Kojima, H. Harada, A. Nakajima, a S. Aoki",1997,Water Res. 31(2):323-327,CC(C)OC(=O)C(C(=O)OC(C)C)=C1SCCS1
50512-35-1,WB,0.25,Oryzias latipes,FT,Cb/Cw,1.477121255,LogBCF (L/kg bdwt),FW,ArnotGobas,"Acute Toxicity, Accumulation a Excretion of Isoprothiolane a Its Degradation Products in Killifish","Tsuda, T., M. Kojima, H. Harada, A. Nakajima, a S. Aoki",1997,Water Res. 31(2):323-327,CC(C)OC(=O)C(C(=O)OC(C)C)=C1SCCS1
50512-35-1,WB,0.25,Oryzias latipes,FT,Cb/Cw,1.447158031,LogBCF (L/kg bdwt),FW,ArnotGobas,"Acute Toxicity, Accumulation a Excretion of Isoprothiolane a Its Degradation Products in Killifish","Tsuda, T., M. Kojima, H. Harada, A. Nakajima, a S. Aoki",1997,Water Res. 31(2):323-327,CC(C)OC(=O)C(C(=O)OC(C)C)=C1SCCS1
50512-35-1,WB,7,Cyprinus carpio,FT,Cb/Cw,1.462397998,LogBCF (L/kg bdwt),FW,ArnotGobas,Accumulation a Excretion of Pesticides Used in Golf-Courses by Carp (Cyprinus carpio) a Willow Shiner (Gnathopogon caerulescens).,"Tsuda, T., S. Aoki, M. Kojima, a T. Fujita",1992,Comp.Biochem.Physiol.C 101(1):63-66,CC(C)OC(=O)C(C(=O)OC(C)C)=C1SCCS1
50512-35-1,WB,10,Cyprinus carpio,FT,Cb/Cw,1.462397998,LogBCF (L/kg bdwt),FW,ArnotGobas,Accumulation a Excretion of Pesticides Used in Golf-Courses by Carp (Cyprinus carpio) a Willow Shiner (Gnathopogon caerulescens).,"Tsuda, T., S. Aoki, M. Kojima, a T. Fujita",1992,Comp.Biochem.Physiol.C 101(1):63-66,CC(C)OC(=O)C(C(=O)OC(C)C)=C1SCCS1
50512-35-1,WB,1,Cyprinus carpio,FT,Cb/Cw,1.447158031,LogBCF (L/kg bdwt),FW,ArnotGobas,Accumulation a Excretion of Pesticides Used in Golf-Courses by Carp (Cyprinus carpio) a Willow Shiner (Gnathopogon caerulescens).,"Tsuda, T., S. Aoki, M. Kojima, a T. Fujita",1992,Comp.Biochem.Physiol.C 101(1):63-66,CC(C)OC(=O)C(C(=O)OC(C)C)=C1SCCS1
50512-35-1,WB,3,Cyprinus carpio,FT,Cb/Cw,1.414973348,LogBCF (L/kg bdwt),FW,ArnotGobas,Accumulation a Excretion of Pesticides Used in Golf-Courses by Carp (Cyprinus carpio) a Willow Shiner (Gnathopogon caerulescens).,"Tsuda, T., S. Aoki, M. Kojima, a T. Fujita",1992,Comp.Biochem.Physiol.C 101(1):63-66,CC(C)OC(=O)C(C(=O)OC(C)C)=C1SCCS1
50512-35-1,WB,14,Cyprinus carpio,FT,Cb/Cw,1.342422681,LogBCF (L/kg bdwt),FW,ArnotGobas,Accumulation a Excretion of Pesticides Used in Golf-Courses by Carp (Cyprinus carpio) a Willow Shiner (Gnathopogon caerulescens).,"Tsuda, T., S. Aoki, M. Kojima, a T. Fujita",1992,Comp.Biochem.Physiol.C 101(1):63-66,CC(C)OC(=O)C(C(=O)OC(C)C)=C1SCCS1
50853-70-8,WB,42,Cyprinus carpio,FT,Cb/Cw,0.74,LogBCF (L/kg bdwt),,ArnotGobas,Biodegradation a Bioconcentration of Existing Chemical Substances uer the Chemical Substances Control Law,Chemicals Evaluation a Research Institute,1992,http://qsar.cerij.or.jp/cgi-bin/DEGACC/iex.cgie,CC1=CC2CC1C(C2C(O)=O)C(O)=O
50853-70-8,WB,42,Cyprinus carpio,FT,Cb/Cw,-0.3,LogBCF (L/kg bdwt),,ArnotGobas,Biodegradation a Bioconcentration of Existing Chemical Substances uer the Chemical Substances Control Law,Chemicals Evaluation a Research Institute,1992,http://qsar.cerij.or.jp/cgi-bin/DEGACC/iex.cgie,CC1=CC2CC1C(C2C(O)=O)C(O)=O
510-15-6,WB,56,Cyprinus carpio,FT,Cb/Cw,2.68349073,LogBCF (L/kg bdwt),,ArnotGobas,Biodegradation a Bioconcentration of Existing Chemical Substances uer the Chemical Substances Control Law,Chemicals Evaluation a Research Institute,1992,http://qsar.cerij.or.jp/cgi-bin/DEGACC/iex.cgie,CCOC(=O)C(O)(C1=CC=C(Cl)C=C1)C1=CC=C(Cl)C=C1
510-15-6,WB,56,Cyprinus carpio,FT,Cb/Cw,2.608908691,LogBCF (L/kg bdwt),,ArnotGobas,Biodegradation a Bioconcentration of Existing Chemical Substances uer the Chemical Substances Control Law,Chemicals Evaluation a Research Institute,1992,http://qsar.cerij.or.jp/cgi-bin/DEGACC/iex.cgie,CCOC(=O)C(O)(C1=CC=C(Cl)C=C1)C1=CC=C(Cl)C=C1
51207-31-9,WB,28,Oncorhynchus mykiss,FT,Cb/Cw,3.781683585,LogBCF (L/kg bdwt),FW,ArnotGobas,"Toxicity a Bioconcentration of 2,3,7,8-Tetrachlorodibenzodioxin a 2,3,7,8-Tetrachlorodibenzofuran in Rainbow Trout","Mehrle, P.M., D.R. Buckler, E.E. Little, L.M. Smith, J.D. Petty, P.H. Peterman, D.L. Stalling, G.M. De Graeve, J.J. Coyl",1988,Environ.Toxicol.Chem. 7(1):47-62,ClC1=CC2=C(C=C1Cl)C1=C(O2)C=C(Cl)C(Cl)=C1
51207-31-9,WB,28,Oncorhynchus mykiss,FT,K1/K2,3.648262406,LogBCF (L/kg bdwt),FW,ArnotGobas,"Toxicity a Bioconcentration of 2,3,7,8-Tetrachlorodibenzodioxin a 2,3,7,8-Tetrachlorodibenzofuran in Rainbow Trout","Mehrle, P.M., D.R. Buckler, E.E. Little, L.M. Smith, J.D. Petty, P.H. Peterman, D.L. Stalling, G.M. De Graeve, J.J. Coyl",1988,Environ.Toxicol.Chem. 7(1):47-62,ClC1=CC2=C(C=C1Cl)C1=C(O2)C=C(Cl)C(Cl)=C1
51207-31-9,WB,14,Oncorhynchus mykiss,FT,Cb/Cw,3.64246452,LogBCF (L/kg bdwt),FW,ArnotGobas,"Toxicity a Bioconcentration of 2,3,7,8-Tetrachlorodibenzodioxin a 2,3,7,8-Tetrachlorodibenzofuran in Rainbow Trout","Mehrle, P.M., D.R. Buckler, E.E. Little, L.M. Smith, J.D. Petty, P.H. Peterman, D.L. Stalling, G.M. De Graeve, J.J. Coyl",1988,Environ.Toxicol.Chem. 7(1):47-62,ClC1=CC2=C(C=C1Cl)C1=C(O2)C=C(Cl)C(Cl)=C1
51207-31-9,WB,7,Oncorhynchus mykiss,FT,Cb/Cw,3.599446376,LogBCF (L/kg bdwt),FW,ArnotGobas,"Toxicity a Bioconcentration of 2,3,7,8-Tetrachlorodibenzodioxin a 2,3,7,8-Tetrachlorodibenzofuran in Rainbow Trout","Mehrle, P.M., D.R. Buckler, E.E. Little, L.M. Smith, J.D. Petty, P.H. Peterman, D.L. Stalling, G.M. De Graeve, J.J. Coyl",1988,Environ.Toxicol.Chem. 7(1):47-62,ClC1=CC2=C(C=C1Cl)C1=C(O2)C=C(Cl)C(Cl)=C1
51207-31-9,WB,21,Oncorhynchus mykiss,FT,Cb/Cw,3.408409578,LogBCF (L/kg bdwt),FW,ArnotGobas,"Toxicity a Bioconcentration of 2,3,7,8-Tetrachlorodibenzodioxin a 2,3,7,8-Tetrachlorodibenzofuran in Rainbow Trout","Mehrle, P.M., D.R. Buckler, E.E. Little, L.M. Smith, J.D. Petty, P.H. Peterman, D.L. Stalling, G.M. De Graeve, J.J. Coyl",1988,Environ.Toxicol.Chem. 7(1):47-62,ClC1=CC2=C(C=C1Cl)C1=C(O2)C=C(Cl)C(Cl)=C1
514-10-3,WB,14,Oncorhynchus mykiss,FT,Cb/Cw,1.838849091,LogBCF (L/kg bdwt),FW,ArnotGobas,Free a Conjugated Concentrations of Nine Resin Acids in Rainbow Trout (Oncorhynchus mykiss) Following Waterborne Exposure,"Niimi, A.J., a H.B. Lee",1992,Environ.Toxicol.Chem. 11(10):1403-1407,CC(C)C1=CC2=CCC3C(C)(CCCC3(C)C(O)=O)C2CC1
514-10-3,WB,20,Oncorhynchus mykiss,FT,Cb/Cw,1.84509804,LogBCF (L/kg bdwt),FW,ArnotGobas,Free a Conjugated Concentrations of Nine Resin Acids in Rainbow Trout (Oncorhynchus mykiss) Following Waterborne Exposure,"Niimi, A.J., a H.B. Lee",1992,Environ.Toxicol.Chem. 11(10):1403-1407,CC(C)C1=CC2=CCC3C(C)(CCCC3(C)C(O)=O)C2CC1
51-44-5,WB,42,Cyprinus carpio,FT,Cb/Cw,0.36,LogBCF (L/kg bdwt),,ArnotGobas,Biodegradation a Bioconcentration of Existing Chemical Substances uer the Chemical Substances Control Law,Chemicals Evaluation a Research Institute,1992,http://qsar.cerij.or.jp/cgi-bin/DEGACC/iex.cgie,OC(=O)C1=CC=C(Cl)C(Cl)=C1
51-44-5,WB,42,Cyprinus carpio,FT,Cb/Cw,-0.7,LogBCF (L/kg bdwt),,ArnotGobas,Biodegradation a Bioconcentration of Existing Chemical Substances uer the Chemical Substances Control Law,Chemicals Evaluation a Research Institute,1992,http://qsar.cerij.or.jp/cgi-bin/DEGACC/iex.cgie,OC(=O)C1=CC=C(Cl)C(Cl)=C1
51630-58-1,WB,4,Oncorhynchus mykiss,FT,K1/K2,2.846337112,LogBCF (L/kg bdwt),FW,ArnotGobas,"Bioconcentration of Pyrethroid Insecticides a DDT by Rainbow Trout: Uptake, Depuration, a Effect of Dissolved Organic Carbon","Muir, D.C.G., B.R. Hobden, a M.R. Servos",1994,Aquat.Toxicol. 29(3/4):223-240,CC(C)C(C(=O)OC(C#N)C1=CC=CC(OC2=CC=CC=C2)=C1)C1=CC=C(Cl)C=C1
51630-58-1,WB,4,Oncorhynchus mykiss,FT,K1/K2,2.684845362,LogBCF (L/kg bdwt),FW,ArnotGobas,"Bioconcentration of Pyrethroid Insecticides a DDT by Rainbow Trout: Uptake, Depuration, a Effect of Dissolved Organic Carbon","Muir, D.C.G., B.R. Hobden, a M.R. Servos",1994,Aquat.Toxicol. 29(3/4):223-240,CC(C)C(C(=O)OC(C#N)C1=CC=CC(OC2=CC=CC=C2)=C1)C1=CC=C(Cl)C=C1
51630-58-1,WB,4,Oncorhynchus mykiss,FT,K1/K2,2.240549248,LogBCF (L/kg bdwt),FW,ArnotGobas,"Bioconcentration of Pyrethroid Insecticides a DDT by Rainbow Trout: Uptake, Depuration, a Effect of Dissolved Organic Carbon","Muir, D.C.G., B.R. Hobden, a M.R. Servos",1994,Aquat.Toxicol. 29(3/4):223-240,CC(C)C(C(=O)OC(C#N)C1=CC=CC(OC2=CC=CC=C2)=C1)C1=CC=C(Cl)C=C1
51630-58-1,WB,4,Oncorhynchus mykiss,FT,K1/K2,2.004321374,LogBCF (L/kg bdwt),FW,ArnotGobas,"Bioconcentration of Pyrethroid Insecticides a DDT by Rainbow Trout: Uptake, Depuration, a Effect of Dissolved Organic Carbon","Muir, D.C.G., B.R. Hobden, a M.R. Servos",1994,Aquat.Toxicol. 29(3/4):223-240,CC(C)C(C(=O)OC(C#N)C1=CC=CC(OC2=CC=CC=C2)=C1)C1=CC=C(Cl)C=C1
520-45-6,WB,5,Oncorhynchus mykiss,FT,Cb/Cw,2.260071388,LogBCF (L/kg bdwt),FW,ArnotGobas,Free a Conjugated Concentrations of Nine Resin Acids in Rainbow Trout (Oncorhynchus mykiss) Following Waterborne Exposure,"Niimi, A.J., a H.B. Lee",1992,Environ.Toxicol.Chem. 11(10):1403-1407,CC(=O)C1=C(O)C=C(C)OC1=O
520-45-6,WB,10,Oncorhynchus mykiss,FT,Cb/Cw,2.257678575,LogBCF (L/kg bdwt),FW,ArnotGobas,Free a Conjugated Concentrations of Nine Resin Acids in Rainbow Trout (Oncorhynchus mykiss) Following Waterborne Exposure,"Niimi, A.J., a H.B. Lee",1992,Environ.Toxicol.Chem. 11(10):1403-1407,CC(=O)C1=C(O)C=C(C)OC1=O
520-45-6,WB,14,Oncorhynchus mykiss,FT,Cb/Cw,2,LogBCF (L/kg bdwt),FW,ArnotGobas,Free a Conjugated Concentrations of Nine Resin Acids in Rainbow Trout (Oncorhynchus mykiss) Following Waterborne Exposure,"Niimi, A.J., a H.B. Lee",1992,Environ.Toxicol.Chem. 11(10):1403-1407,CC(=O)C1=C(O)C=C(C)OC1=O
520-45-6,WB,20,Oncorhynchus mykiss,FT,Cb/Cw,1.963787827,LogBCF (L/kg bdwt),FW,ArnotGobas,Free a Conjugated Concentrations of Nine Resin Acids in Rainbow Trout (Oncorhynchus mykiss) Following Waterborne Exposure,"Niimi, A.J., a H.B. Lee",1992,Environ.Toxicol.Chem. 11(10):1403-1407,CC(=O)C1=C(O)C=C(C)OC1=O
52303-69-2,WB,3,Oryzias latipes,FT,Cb/Cw,-0.657577319,LogBCF (L/kg bdwt),FW,ArnotGobas,"Acute Toxicity, Accumulation a Excretion of Isoprothiolane a Its Degradation Products in Killifish","Tsuda, T., M. Kojima, H. Harada, A. Nakajima, a S. Aoki",1997,Water Res. 31(2):323-327,CC(C)OC(=O)C(C(=O)OC(C)C)=C1SCCS1=O
52303-69-2,WB,0.25,Oryzias latipes,FT,Cb/Cw,-0.698970004,LogBCF (L/kg bdwt),FW,ArnotGobas,"Acute Toxicity, Accumulation a Excretion of Isoprothiolane a Its Degradation Products in Killifish","Tsuda, T., M. Kojima, H. Harada, A. Nakajima, a S. Aoki",1997,Water Res. 31(2):323-327,CC(C)OC(=O)C(C(=O)OC(C)C)=C1SCCS1=O
52303-69-2,WB,7.01,Oryzias latipes,FT,Cb/Cw,-0.744727495,LogBCF (L/kg bdwt),FW,ArnotGobas,"Acute Toxicity, Accumulation a Excretion of Isoprothiolane a Its Degradation Products in Killifish","Tsuda, T., M. Kojima, H. Harada, A. Nakajima, a S. Aoki",1997,Water Res. 31(2):323-327,CC(C)OC(=O)C(C(=O)OC(C)C)=C1SCCS1=O
52303-69-2,WB,1,Oryzias latipes,FT,Cb/Cw,-0.795880017,LogBCF (L/kg bdwt),FW,ArnotGobas,"Acute Toxicity, Accumulation a Excretion of Isoprothiolane a Its Degradation Products in Killifish","Tsuda, T., M. Kojima, H. Harada, A. Nakajima, a S. Aoki",1997,Water Res. 31(2):323-327,CC(C)OC(=O)C(C(=O)OC(C)C)=C1SCCS1=O
52303-69-2,WB,5,Oryzias latipes,FT,Cb/Cw,-0.795880017,LogBCF (L/kg bdwt),FW,ArnotGobas,"Acute Toxicity, Accumulation a Excretion of Isoprothiolane a Its Degradation Products in Killifish","Tsuda, T., M. Kojima, H. Harada, A. Nakajima, a S. Aoki",1997,Water Res. 31(2):323-327,CC(C)OC(=O)C(C(=O)OC(C)C)=C1SCCS1=O
52303-69-2,WB,0.5,Oryzias latipes,FT,Cb/Cw,-0.823908741,LogBCF (L/kg bdwt),FW,ArnotGobas,"Acute Toxicity, Accumulation a Excretion of Isoprothiolane a Its Degradation Products in Killifish","Tsuda, T., M. Kojima, H. Harada, A. Nakajima, a S. Aoki",1997,Water Res. 31(2):323-327,CC(C)OC(=O)C(C(=O)OC(C)C)=C1SCCS1=O
52303-69-2,WB,2,Oryzias latipes,FT,Cb/Cw,-0.958607315,LogBCF (L/kg bdwt),FW,ArnotGobas,"Acute Toxicity, Accumulation a Excretion of Isoprothiolane a Its Degradation Products in Killifish","Tsuda, T., M. Kojima, H. Harada, A. Nakajima, a S. Aoki",1997,Water Res. 31(2):323-327,CC(C)OC(=O)C(C(=O)OC(C)C)=C1SCCS1=O
52322-80-2,WB,8,Poecilia reticulata,FT,K1/K2,3.644612342,LogBCF (L/kg bdwt),FW,ArnotGobas,"Bioconcentration Kinetics of 2,4,5- Tri- a 3,3',4,4'-Tetrachlorobiphenyl a 2,4,5- Tri- a 3,3',4,4'-Tetrachlorodiphenylether in Fish","Opperhuizen, A., a P.I. Voors",1987,Chemosphere 16(10-12):2379-2388,ClC1=CC(Cl)=C(OC2=CC=CC=C2)C=C1Cl
52663-63-5,WB,30,Danio rerio,FT,K1/K2,5.54,LogBCF (L/kg bdwt),FW,ArnotGobas,Kinetics of Bioconcentration a Clearance of 28 Polychlorinated Biphenyl Congeners in Zebrafish (Brachydanio rerio),"Fox, K., G.P. Zauke, a W. Butte",1994,Ecotoxicol.Environ.Saf. 28(1):99-109,ClC1=CC=C(Cl)C(=C1)C1=C(Cl)C(Cl)=CC(Cl)=C1Cl
52663-69-1,WB,30,Danio rerio,FT,K1/K2,5.84,LogBCF (L/kg bdwt),FW,ArnotGobas,Kinetics of Bioconcentration a Clearance of 28 Polychlorinated Biphenyl Congeners in Zebrafish (Brachydanio rerio),"Fox, K., G.P. Zauke, a W. Butte",1994,Ecotoxicol.Environ.Saf. 28(1):99-109,ClC1=CC(Cl)=C(C=C1Cl)C1=C(Cl)C=C(Cl)C(Cl)=C1Cl
52663-78-2,WB,30,Danio rerio,FT,K1/K2,5.92,LogBCF (L/kg bdwt),FW,ArnotGobas,Kinetics of Bioconcentration a Clearance of 28 Polychlorinated Biphenyl Congeners in Zebrafish (Brachydanio rerio),"Fox, K., G.P. Zauke, a W. Butte",1994,Ecotoxicol.Environ.Saf. 28(1):99-109,ClC1=CC=C(C(Cl)=C1Cl)C1=C(Cl)C(Cl)=C(Cl)C(Cl)=C1Cl
52712-04-6,WB,30,Danio rerio,FT,K1/K2,5.81,LogBCF (L/kg bdwt),FW,ArnotGobas,Kinetics of Bioconcentration a Clearance of 28 Polychlorinated Biphenyl Congeners in Zebrafish (Brachydanio rerio),"Fox, K., G.P. Zauke, a W. Butte",1994,Ecotoxicol.Environ.Saf. 28(1):99-109,ClC1=CC=C(Cl)C(=C1)C1=CC(Cl)=C(Cl)C(Cl)=C1Cl
52712-05-7,WB,30,Danio rerio,FT,K1/K2,5.93,LogBCF (L/kg bdwt),FW,ArnotGobas,Kinetics of Bioconcentration a Clearance of 28 Polychlorinated Biphenyl Congeners in Zebrafish (Brachydanio rerio),"Fox, K., G.P. Zauke, a W. Butte",1994,Ecotoxicol.Environ.Saf. 28(1):99-109,ClC1=CC=C(Cl)C(=C1)C1=C(Cl)C(Cl)=C(Cl)C(Cl)=C1Cl
52789-62-5,WB,42,Cyprinus carpio,FT,Cb/Cw,0.9,LogBCF (L/kg bdwt),,ArnotGobas,Biodegradation a Bioconcentration of Existing Chemical Substances uer the Chemical Substances Control Law,Chemicals Evaluation a Research Institute,1992,http://qsar.cerij.or.jp/cgi-bin/DEGACC/iex.cgie,NC1=C(C=C(C2=CC=CC(O)=C12)S(O)(=O)=O)S(O)(=O)=O
52789-62-5,WB,42,Cyprinus carpio,FT,Cb/Cw,-0.1,LogBCF (L/kg bdwt),,ArnotGobas,Biodegradation a Bioconcentration of Existing Chemical Substances uer the Chemical Substances Control Law,Chemicals Evaluation a Research Institute,1992,http://qsar.cerij.or.jp/cgi-bin/DEGACC/iex.cgie,NC1=C(C=C(C2=CC=CC(O)=C12)S(O)(=O)=O)S(O)(=O)=O
52918-63-5,WB,4,Oncorhynchus mykiss,FT,K1/K2,2.506505032,LogBCF (L/kg bdwt),FW,ArnotGobas,"Bioconcentration of Pyrethroid Insecticides a DDT by Rainbow Trout: Uptake, Depuration, a Effect of Dissolved Organic Carbon","Muir, D.C.G., B.R. Hobden, a M.R. Servos",1994,Aquat.Toxicol. 29(3/4):223-240,CC1(C)C(C=C(Br)Br)C1C(=O)OC(C#N)C1=CC=CC(OC2=CC=CC=C2)=C1
52918-63-5,WB,4,Oncorhynchus mykiss,FT,K1/K2,2.068185862,LogBCF (L/kg bdwt),FW,ArnotGobas,"Bioconcentration of Pyrethroid Insecticides a DDT by Rainbow Trout: Uptake, Depuration, a Effect of Dissolved Organic Carbon","Muir, D.C.G., B.R. Hobden, a M.R. Servos",1994,Aquat.Toxicol. 29(3/4):223-240,CC1(C)C(C=C(Br)Br)C1C(=O)OC(C#N)C1=CC=CC(OC2=CC=CC=C2)=C1
52918-63-5,WB,4,Oncorhynchus mykiss,FT,K1/K2,2.025305865,LogBCF (L/kg bdwt),FW,ArnotGobas,"Bioconcentration of Pyrethroid Insecticides a DDT by Rainbow Trout: Uptake, Depuration, a Effect of Dissolved Organic Carbon","Muir, D.C.G., B.R. Hobden, a M.R. Servos",1994,Aquat.Toxicol. 29(3/4):223-240,CC1(C)C(C=C(Br)Br)C1C(=O)OC(C#N)C1=CC=CC(OC2=CC=CC=C2)=C1
52918-63-5,WB,4,Oncorhynchus mykiss,FT,K1/K2,1.633468456,LogBCF (L/kg bdwt),FW,ArnotGobas,"Bioconcentration of Pyrethroid Insecticides a DDT by Rainbow Trout: Uptake, Depuration, a Effect of Dissolved Organic Carbon","Muir, D.C.G., B.R. Hobden, a M.R. Servos",1994,Aquat.Toxicol. 29(3/4):223-240,CC1(C)C(C=C(Br)Br)C1C(=O)OC(C#N)C1=CC=CC(OC2=CC=CC=C2)=C1
535-77-3,WB,56,Cyprinus carpio,FT,Cb/Cw,2.7320918,LogBCF (L/kg bdwt),,ArnotGobas,Biodegradation a Bioconcentration of Existing Chemical Substances uer the Chemical Substances Control Law,Chemicals Evaluation a Research Institute,1992,http://qsar.cerij.or.jp/cgi-bin/DEGACC/iex.cgie,CC(C)C1=CC=CC(C)=C1
535-77-3,WB,56,Cyprinus carpio,FT,Cb/Cw,2.696371855,LogBCF (L/kg bdwt),,ArnotGobas,Biodegradation a Bioconcentration of Existing Chemical Substances uer the Chemical Substances Control Law,Chemicals Evaluation a Research Institute,1992,http://qsar.cerij.or.jp/cgi-bin/DEGACC/iex.cgie,CC(C)C1=CC=CC(C)=C1
54135-80-7,WB,90,Oncorhynchus mykiss,FT,Cb/Cw,2.96,LogBCF (L/kg bdwt),FW,ArnotGobas,The Relationship Between Bioconcentration Factor in Rainbow Trout a Physical-Chemical Properties for some Halogenated Compous.,"Oliver, B.G.",1984,In: QSAR in Environmental Toxicology :300-317,COC1=CC=C(Cl)C(Cl)=C1Cl
54135-80-7,WB,21,Oncorhynchus mykiss,FT,Cb/Cw,3.176091259,LogBCF (L/kg bdwt),FW,ArnotGobas,Bioconcentration Factors of Some Halogenated Organics for Rainbow Trout: Limitations in Their Use for Prediction of Environmental Residues,"Oliver, B.G., a A.J. Niimi",1985,Environ.Sci.Technol. 19(9):842-849,COC1=CC=C(Cl)C(Cl)=C1Cl
54135-80-7,WB,7,Oncorhynchus mykiss,FT,Cb/Cw,3.146128036,LogBCF (L/kg bdwt),FW,ArnotGobas,Bioconcentration Factors of Some Halogenated Organics for Rainbow Trout: Limitations in Their Use for Prediction of Environmental Residues,"Oliver, B.G., a A.J. Niimi",1985,Environ.Sci.Technol. 19(9):842-849,COC1=CC=C(Cl)C(Cl)=C1Cl
54135-80-7,WB,21,Oncorhynchus mykiss,FT,Cb/Cw,3.414973348,LogBCF (L/kg bdwt),FW,ArnotGobas,Bioconcentration Factors of Some Halogenated Organics for Rainbow Trout: Limitations in Their Use for Prediction of Environmental Residues,"Oliver, B.G., a A.J. Niimi",1985,Environ.Sci.Technol. 19(9):842-849,COC1=CC=C(Cl)C(Cl)=C1Cl
54135-80-7,WB,50,Oncorhynchus mykiss,FT,Cb/Cw,3.255272505,LogBCF (L/kg bdwt),FW,ArnotGobas,Bioconcentration Factors of Some Halogenated Organics for Rainbow Trout: Limitations in Their Use for Prediction of Environmental Residues,"Oliver, B.G., a A.J. Niimi",1985,Environ.Sci.Technol. 19(9):842-849,COC1=CC=C(Cl)C(Cl)=C1Cl
54135-80-7,WB,50,Oncorhynchus mykiss,FT,Cb/Cw,3.397940009,LogBCF (L/kg bdwt),FW,ArnotGobas,Bioconcentration Factors of Some Halogenated Organics for Rainbow Trout: Limitations in Their Use for Prediction of Environmental Residues,"Oliver, B.G., a A.J. Niimi",1985,Environ.Sci.Technol. 19(9):842-849,COC1=CC=C(Cl)C(Cl)=C1Cl
54135-80-7,WB,7,Oncorhynchus mykiss,FT,Cb/Cw,3.113943352,LogBCF (L/kg bdwt),FW,ArnotGobas,Bioconcentration Factors of Some Halogenated Organics for Rainbow Trout: Limitations in Their Use for Prediction of Environmental Residues,"Oliver, B.G., a A.J. Niimi",1985,Environ.Sci.Technol. 19(9):842-849,COC1=CC=C(Cl)C(Cl)=C1Cl
54135-80-7,WB,35,Oncorhynchus mykiss,FT,Cb/Cw,3.342422681,LogBCF (L/kg bdwt),FW,ArnotGobas,Bioconcentration Factors of Some Halogenated Organics for Rainbow Trout: Limitations in Their Use for Prediction of Environmental Residues,"Oliver, B.G., a A.J. Niimi",1985,Environ.Sci.Technol. 19(9):842-849,COC1=CC=C(Cl)C(Cl)=C1Cl
54135-80-7,WB,75,Oncorhynchus mykiss,FT,Cb/Cw,3.204119983,LogBCF (L/kg bdwt),FW,ArnotGobas,Bioconcentration Factors of Some Halogenated Organics for Rainbow Trout: Limitations in Their Use for Prediction of Environmental Residues,"Oliver, B.G., a A.J. Niimi",1985,Environ.Sci.Technol. 19(9):842-849,COC1=CC=C(Cl)C(Cl)=C1Cl
54135-80-7,WB,35,Oncorhynchus mykiss,FT,Cb/Cw,3.342422681,LogBCF (L/kg bdwt),FW,ArnotGobas,Bioconcentration Factors of Some Halogenated Organics for Rainbow Trout: Limitations in Their Use for Prediction of Environmental Residues,"Oliver, B.G., a A.J. Niimi",1985,Environ.Sci.Technol. 19(9):842-849,COC1=CC=C(Cl)C(Cl)=C1Cl
54135-80-7,WB,96,Oncorhynchus mykiss,FT,Cb/Cw,3.380211242,LogBCF (L/kg bdwt),FW,ArnotGobas,Bioconcentration Factors of Some Halogenated Organics for Rainbow Trout: Limitations in Their Use for Prediction of Environmental Residues,"Oliver, B.G., a A.J. Niimi",1985,Environ.Sci.Technol. 19(9):842-849,COC1=CC=C(Cl)C(Cl)=C1Cl
54135-80-7,WB,96,Oncorhynchus mykiss,FT,Cb/Cw,3.255272505,LogBCF (L/kg bdwt),FW,ArnotGobas,Bioconcentration Factors of Some Halogenated Organics for Rainbow Trout: Limitations in Their Use for Prediction of Environmental Residues,"Oliver, B.G., a A.J. Niimi",1985,Environ.Sci.Technol. 19(9):842-849,COC1=CC=C(Cl)C(Cl)=C1Cl
54135-80-7,WB,75,Oncorhynchus mykiss,FT,Cb/Cw,2.959041392,LogBCF (L/kg bdwt),FW,ArnotGobas,Bioconcentration Factors of Some Halogenated Organics for Rainbow Trout: Limitations in Their Use for Prediction of Environmental Residues,"Oliver, B.G., a A.J. Niimi",1985,Environ.Sci.Technol. 19(9):842-849,COC1=CC=C(Cl)C(Cl)=C1Cl
541-73-1,WB,63,Oncorhynchus mykiss,FT,Cb/Cw,2.812913357,LogBCF (L/kg bdwt),FW,ArnotGobas,Bioconcentration of Chlorobenzenes from Water by Rainbow Trout: Correlations with Partition Coefficients a Environmental Residues,"Oliver, B.G. a A.J. Niimi",1983,Environ.Sci.Technol. 17:287-291,ClC1=CC(Cl)=CC=C1
541-73-1,WB,32,Pimephales promelas,FT,Cb/Cw,2.007686829,LogBCF (L/kg bdwt),FW,ArnotGobas,Toxicity of Chlorinated Benzenes to Fathead Minnows (Pimephales promelas),"Carlson, A.R., a P.A. Kosian",1987,Arch.Environ.Contam.Toxicol. 16(2):129-135,ClC1=CC(Cl)=CC=C1
541-73-1,WB,32,Pimephales promelas,FT,Cb/Cw,1.985276743,LogBCF (L/kg bdwt),FW,ArnotGobas,Toxicity of Chlorinated Benzenes to Fathead Minnows (Pimephales promelas),"Carlson, A.R., a P.A. Kosian",1987,Arch.Environ.Contam.Toxicol. 16(2):129-135,ClC1=CC(Cl)=CC=C1
541-73-1,WB,56,Cyprinus carpio,FT,Cb/Cw,2.33150749,LogBCF (L/kg bdwt),FW,ArnotGobas,Biodegradation a Bioconcentration of Existing Chemical Substances uer the Chemical Substances Control Law,Chemicals Evaluation a Research Institute,1992,http://qsar.cerij.or.jp/cgi-bin/DEGACC/iex.cgie,ClC1=CC(Cl)=CC=C1
541-73-1,WB,56,Cyprinus carpio,FT,Cb/Cw,2.156292798,LogBCF (L/kg bdwt),FW,ArnotGobas,Biodegradation a Bioconcentration of Existing Chemical Substances uer the Chemical Substances Control Law,Chemicals Evaluation a Research Institute,1992,http://qsar.cerij.or.jp/cgi-bin/DEGACC/iex.cgie,ClC1=CC(Cl)=CC=C1
541-73-1,WB,7,Oncorhynchus mykiss,FT,Cb/Cw,2.819543936,LogBCF (L/kg bdwt),FW,ArnotGobas,Bioconcentration of Chlorobenzenes from Water by Rainbow Trout: Correlations with Partition Coefficients a Environmental Residues,"Oliver, B.G. a A.J. Niimi",1983,Environ.Sci.Technol. 17:287-291,ClC1=CC(Cl)=CC=C1
541-73-1,WB,43,Oncorhynchus mykiss,FT,Cb/Cw,2.959041392,LogBCF (L/kg bdwt),FW,ArnotGobas,Bioconcentration of Chlorobenzenes from Water by Rainbow Trout: Correlations with Partition Coefficients a Environmental Residues,"Oliver, B.G. a A.J. Niimi",1983,Environ.Sci.Technol. 17:287-291,ClC1=CC(Cl)=CC=C1
541-73-1,WB,105,Oncorhynchus mykiss,FT,Cb/Cw,2.963787827,LogBCF (L/kg bdwt),FW,ArnotGobas,Bioconcentration of Chlorobenzenes from Water by Rainbow Trout: Correlations with Partition Coefficients a Environmental Residues,"Oliver, B.G. a A.J. Niimi",1983,Environ.Sci.Technol. 17:287-291,ClC1=CC(Cl)=CC=C1
541-73-1,WB,22,Oncorhynchus mykiss,FT,Cb/Cw,2.740362689,LogBCF (L/kg bdwt),FW,ArnotGobas,Bioconcentration of Chlorobenzenes from Water by Rainbow Trout: Correlations with Partition Coefficients a Environmental Residues,"Oliver, B.G. a A.J. Niimi",1983,Environ.Sci.Technol. 17:287-291,ClC1=CC(Cl)=CC=C1
541-73-1,WB,119,Oncorhynchus mykiss,FT,Cb/Cw,2.681241237,LogBCF (L/kg bdwt),FW,ArnotGobas,Bioconcentration of Chlorobenzenes from Water by Rainbow Trout: Correlations with Partition Coefficients a Environmental Residues,"Oliver, B.G. a A.J. Niimi",1983,Environ.Sci.Technol. 17:287-291,ClC1=CC(Cl)=CC=C1
541-73-1,WB,99,Oncorhynchus mykiss,FT,Cb/Cw,2.62324929,LogBCF (L/kg bdwt),FW,ArnotGobas,Bioconcentration of Chlorobenzenes from Water by Rainbow Trout: Correlations with Partition Coefficients a Environmental Residues,"Oliver, B.G. a A.J. Niimi",1983,Environ.Sci.Technol. 17:287-291,ClC1=CC(Cl)=CC=C1
541-73-1,WB,69,Oncorhynchus mykiss,FT,Cb/Cw,2.633468456,LogBCF (L/kg bdwt),FW,ArnotGobas,Bioconcentration of Chlorobenzenes from Water by Rainbow Trout: Correlations with Partition Coefficients a Environmental Residues,"Oliver, B.G. a A.J. Niimi",1983,Environ.Sci.Technol. 17:287-291,ClC1=CC(Cl)=CC=C1
541-73-1,WB,8,Oncorhynchus mykiss,FT,Cb/Cw,2.568201724,LogBCF (L/kg bdwt),FW,ArnotGobas,Bioconcentration of Chlorobenzenes from Water by Rainbow Trout: Correlations with Partition Coefficients a Environmental Residues,"Oliver, B.G. a A.J. Niimi",1983,Environ.Sci.Technol. 17:287-291,ClC1=CC(Cl)=CC=C1
541-73-1,WB,39,Oncorhynchus mykiss,FT,Cb/Cw,2.579783597,LogBCF (L/kg bdwt),FW,ArnotGobas,Bioconcentration of Chlorobenzenes from Water by Rainbow Trout: Correlations with Partition Coefficients a Environmental Residues,"Oliver, B.G. a A.J. Niimi",1983,Environ.Sci.Technol. 17:287-291,ClC1=CC(Cl)=CC=C1
541-73-1,WB,2,Poecilia reticulata,FT,Cb/Cw,2.518974311,LogBCF (L/kg bdwt),FW,ArnotGobas,Thermodynamics of Fish/Water a Octanol/Water Partitioning of some Chlorinated Benzenes,"Opperhuizen, A., P. Serne a J.M.D. van der Steen",1988,Environ. Sci Technol. 22:286-292,ClC1=CC(Cl)=CC=C1
541-73-1,WB,2,Poecilia reticulata,FT,Cb/Cw,2.478999132,LogBCF (L/kg bdwt),FW,ArnotGobas,Thermodynamics of Fish/Water a Octanol/Water Partitioning of some Chlorinated Benzenes,"Opperhuizen, A., P. Serne a J.M.D. van der Steen",1988,Environ. Sci Technol. 22:286-292,ClC1=CC(Cl)=CC=C1
541-73-1,WB,2,Poecilia reticulata,FT,Cb/Cw,2.468937806,LogBCF (L/kg bdwt),FW,ArnotGobas,Thermodynamics of Fish/Water a Octanol/Water Partitioning of some Chlorinated Benzenes,"Opperhuizen, A., P. Serne a J.M.D. van der Steen",1988,Environ. Sci Technol. 22:286-292,ClC1=CC(Cl)=CC=C1
5428-54-6,WB,42,Cyprinus carpio,FT,Cb/Cw,0.85029982,LogBCF (L/kg bdwt),,ArnotGobas,Biodegradation a Bioconcentration of Existing Chemical Substances uer the Chemical Substances Control Law,Chemicals Evaluation a Research Institute,1992,http://qsar.cerij.or.jp/cgi-bin/DEGACC/iex.cgie,CC1=CC=C(C=C1O)[N+]([O-])=O
5428-54-6,WB,42,Cyprinus carpio,FT,Cb/Cw,0.747571236,LogBCF (L/kg bdwt),,ArnotGobas,Biodegradation a Bioconcentration of Existing Chemical Substances uer the Chemical Substances Control Law,Chemicals Evaluation a Research Institute,1992,http://qsar.cerij.or.jp/cgi-bin/DEGACC/iex.cgie,CC1=CC=C(C=C1O)[N+]([O-])=O
544-01-4,WB,56,Cyprinus carpio,FT,Cb/Cw,2.336176972,LogBCF (L/kg bdwt),,ArnotGobas,Biodegradation a Bioconcentration of Existing Chemical Substances uer the Chemical Substances Control Law,Chemicals Evaluation a Research Institute,1992,http://qsar.cerij.or.jp/cgi-bin/DEGACC/iex.cgie,CC(C)CCOCCC(C)C
544-01-4,WB,56,Cyprinus carpio,FT,Cb/Cw,2.230724682,LogBCF (L/kg bdwt),,ArnotGobas,Biodegradation a Bioconcentration of Existing Chemical Substances uer the Chemical Substances Control Law,Chemicals Evaluation a Research Institute,1992,http://qsar.cerij.or.jp/cgi-bin/DEGACC/iex.cgie,CC(C)CCOCCC(C)C
5510-99-6,WB,56,Cyprinus carpio,FT,Cb/Cw,2.553265989,LogBCF (L/kg bdwt),,ArnotGobas,Biodegradation a Bioconcentration of Existing Chemical Substances uer the Chemical Substances Control Law,Chemicals Evaluation a Research Institute,1992,http://qsar.cerij.or.jp/cgi-bin/DEGACC/iex.cgie,CCC(C)C1=CC=CC(C(C)CC)=C1O
5510-99-6,WB,56,Cyprinus carpio,FT,Cb/Cw,2.39029982,LogBCF (L/kg bdwt),,ArnotGobas,Biodegradation a Bioconcentration of Existing Chemical Substances uer the Chemical Substances Control Law,Chemicals Evaluation a Research Institute,1992,http://qsar.cerij.or.jp/cgi-bin/DEGACC/iex.cgie,CCC(C)C1=CC=CC(C(C)CC)=C1O
55-38-9,WB,7.01,Poecilia reticulata,FT,Cb/Cw,3.16459076,LogBCF (L/kg bdwt),FW,ArnotGobas,Uptake a Elimination Kinetics of Organophosphorous Pesticides in the Guppy (Poecilia reticulata): Correlations with the Octanol/Water Partition,"De Bruijn, J., a J. Hermens",1991,Environ.Toxicol.Chem. 10(6):791-804,COP(=S)(OC)OC1=CC=C(SC)C(C)=C1
55-38-9,WB,7.01,Oryzias latipes,FT,Cb/Cw,2.746634199,LogBCF (L/kg bdwt),FW,ArnotGobas,Relationships of Bioconcentration Factors of Organophosphate Pesticides Among Species of Fish,"Tsuda, T., M. Kojima, H. Harada, A. Nakajima, a S. Aoki",1997,Comp.Biochem.Physiol.C 116(3):213-218,COP(=S)(OC)OC1=CC=C(SC)C(C)=C1
55-38-9,WB,5,Oryzias latipes,FT,Cb/Cw,2.7355989,LogBCF (L/kg bdwt),FW,ArnotGobas,Relationships of Bioconcentration Factors of Organophosphate Pesticides Among Species of Fish,"Tsuda, T., M. Kojima, H. Harada, A. Nakajima, a S. Aoki",1997,Comp.Biochem.Physiol.C 116(3):213-218,COP(=S)(OC)OC1=CC=C(SC)C(C)=C1
55-38-9,WB,3,Oryzias latipes,FT,Cb/Cw,2.639486489,LogBCF (L/kg bdwt),FW,ArnotGobas,Relationships of Bioconcentration Factors of Organophosphate Pesticides Among Species of Fish,"Tsuda, T., M. Kojima, H. Harada, A. Nakajima, a S. Aoki",1997,Comp.Biochem.Physiol.C 116(3):213-218,COP(=S)(OC)OC1=CC=C(SC)C(C)=C1
55-38-9,WB,5,Poecilia reticulata,FT,Cb/Cw,2.929418926,LogBCF (L/kg bdwt),FW,ArnotGobas,Relationships of Bioconcentration Factors of Organophosphate Pesticides Among Species of Fish,"Tsuda, T., M. Kojima, H. Harada, A. Nakajima, a S. Aoki",1997,Comp.Biochem.Physiol.C 116(3):213-218,COP(=S)(OC)OC1=CC=C(SC)C(C)=C1
55-38-9,WB,7.01,Poecilia reticulata,FT,Cb/Cw,2.913813852,LogBCF (L/kg bdwt),FW,ArnotGobas,Relationships of Bioconcentration Factors of Organophosphate Pesticides Among Species of Fish,"Tsuda, T., M. Kojima, H. Harada, A. Nakajima, a S. Aoki",1997,Comp.Biochem.Physiol.C 116(3):213-218,COP(=S)(OC)OC1=CC=C(SC)C(C)=C1
55-38-9,WB,3,Poecilia reticulata,FT,Cb/Cw,2.887054378,LogBCF (L/kg bdwt),FW,ArnotGobas,Relationships of Bioconcentration Factors of Organophosphate Pesticides Among Species of Fish,"Tsuda, T., M. Kojima, H. Harada, A. Nakajima, a S. Aoki",1997,Comp.Biochem.Physiol.C 116(3):213-218,COP(=S)(OC)OC1=CC=C(SC)C(C)=C1
55-38-9,WB,5,Carassius auratus,FT,Cb/Cw,2.565847819,LogBCF (L/kg bdwt),FW,ArnotGobas,Relationships of Bioconcentration Factors of Organophosphate Pesticides Among Species of Fish,"Tsuda, T., M. Kojima, H. Harada, A. Nakajima, a S. Aoki",1997,Comp.Biochem.Physiol.C 116(3):213-218,COP(=S)(OC)OC1=CC=C(SC)C(C)=C1
55-38-9,WB,5,Poecilia reticulata,FT,Cb/Cw,2.804820679,LogBCF (L/kg bdwt),FW,ArnotGobas,Relationships of Bioconcentration Factors of Organophosphate Pesticides Among Species of Fish,"Tsuda, T., M. Kojima, H. Harada, A. Nakajima, a S. Aoki",1997,Comp.Biochem.Physiol.C 116(3):213-218,COP(=S)(OC)OC1=CC=C(SC)C(C)=C1
55-38-9,WB,7.01,Poecilia reticulata,FT,Cb/Cw,2.80140371,LogBCF (L/kg bdwt),FW,ArnotGobas,Relationships of Bioconcentration Factors of Organophosphate Pesticides Among Species of Fish,"Tsuda, T., M. Kojima, H. Harada, A. Nakajima, a S. Aoki",1997,Comp.Biochem.Physiol.C 116(3):213-218,COP(=S)(OC)OC1=CC=C(SC)C(C)=C1
55-38-9,WB,3,Poecilia reticulata,FT,Cb/Cw,2.733999287,LogBCF (L/kg bdwt),FW,ArnotGobas,Relationships of Bioconcentration Factors of Organophosphate Pesticides Among Species of Fish,"Tsuda, T., M. Kojima, H. Harada, A. Nakajima, a S. Aoki",1997,Comp.Biochem.Physiol.C 116(3):213-218,COP(=S)(OC)OC1=CC=C(SC)C(C)=C1
55-38-9,WB,1,Tanichthys albonubes,FT,Cb/Cw,2.456366033,LogBCF (L/kg bdwt),FW,ArnotGobas,Relationships of Bioconcentration Factors of Organophosphate Pesticides Among Species of Fish,"Tsuda, T., M. Kojima, H. Harada, A. Nakajima, a S. Aoki",1997,Comp.Biochem.Physiol.C 116(3):213-218,COP(=S)(OC)OC1=CC=C(SC)C(C)=C1
55-38-9,WB,3,Carassius auratus,FT,Cb/Cw,2.457881897,LogBCF (L/kg bdwt),FW,ArnotGobas,Relationships of Bioconcentration Factors of Organophosphate Pesticides Among Species of Fish,"Tsuda, T., M. Kojima, H. Harada, A. Nakajima, a S. Aoki",1997,Comp.Biochem.Physiol.C 116(3):213-218,COP(=S)(OC)OC1=CC=C(SC)C(C)=C1
55-38-9,WB,1,Poecilia reticulata,FT,Cb/Cw,2.556302501,LogBCF (L/kg bdwt),FW,ArnotGobas,Relationships of Bioconcentration Factors of Organophosphate Pesticides Among Species of Fish,"Tsuda, T., M. Kojima, H. Harada, A. Nakajima, a S. Aoki",1997,Comp.Biochem.Physiol.C 116(3):213-218,COP(=S)(OC)OC1=CC=C(SC)C(C)=C1
55-38-9,WB,1,Poecilia reticulata,FT,Cb/Cw,2.582063363,LogBCF (L/kg bdwt),FW,ArnotGobas,Relationships of Bioconcentration Factors of Organophosphate Pesticides Among Species of Fish,"Tsuda, T., M. Kojima, H. Harada, A. Nakajima, a S. Aoki",1997,Comp.Biochem.Physiol.C 116(3):213-218,COP(=S)(OC)OC1=CC=C(SC)C(C)=C1
55-38-9,WB,7.01,Carassius auratus,FT,Cb/Cw,2.222716471,LogBCF (L/kg bdwt),FW,ArnotGobas,Relationships of Bioconcentration Factors of Organophosphate Pesticides Among Species of Fish,"Tsuda, T., M. Kojima, H. Harada, A. Nakajima, a S. Aoki",1997,Comp.Biochem.Physiol.C 116(3):213-218,COP(=S)(OC)OC1=CC=C(SC)C(C)=C1
55-38-9,WB,1,Carassius auratus,FT,Cb/Cw,2.187520721,LogBCF (L/kg bdwt),FW,ArnotGobas,Relationships of Bioconcentration Factors of Organophosphate Pesticides Among Species of Fish,"Tsuda, T., M. Kojima, H. Harada, A. Nakajima, a S. Aoki",1997,Comp.Biochem.Physiol.C 116(3):213-218,COP(=S)(OC)OC1=CC=C(SC)C(C)=C1
55-38-9,WB,1,Oryzias latipes,FT,Cb/Cw,2.245512668,LogBCF (L/kg bdwt),FW,ArnotGobas,Relationships of Bioconcentration Factors of Organophosphate Pesticides Among Species of Fish,"Tsuda, T., M. Kojima, H. Harada, A. Nakajima, a S. Aoki",1997,Comp.Biochem.Physiol.C 116(3):213-218,COP(=S)(OC)OC1=CC=C(SC)C(C)=C1
55-38-9,WB,0.5,Oryzias latipes,FT,Cb/Cw,2.240549248,LogBCF (L/kg bdwt),FW,ArnotGobas,Relationships of Bioconcentration Factors of Organophosphate Pesticides Among Species of Fish,"Tsuda, T., M. Kojima, H. Harada, A. Nakajima, a S. Aoki",1997,Comp.Biochem.Physiol.C 116(3):213-218,COP(=S)(OC)OC1=CC=C(SC)C(C)=C1
55-38-9,WB,6,Oryzias latipes,FT,Cb/Cw,2.240549248,LogBCF (L/kg bdwt),FW,ArnotGobas,"Accumulation a Excretion of Fenthion, Fenthion Sulfoxide a Fenthion Sulfone by Killifish (Oryzias latipes)","Tsuda, T., M. Kojima, H. Harada, A. Nakajima, a S. Aoki",1996,Comp.Biochem.Physiol.C 113(1):45-49,COP(=S)(OC)OC1=CC=C(SC)C(C)=C1
55-38-9,WB,3,Oryzias latipes,FT,Cb/Cw,2.217483944,LogBCF (L/kg bdwt),FW,ArnotGobas,"Accumulation a Excretion of Fenthion, Fenthion Sulfoxide a Fenthion Sulfone by Killifish (Oryzias latipes)","Tsuda, T., M. Kojima, H. Harada, A. Nakajima, a S. Aoki",1996,Comp.Biochem.Physiol.C 113(1):45-49,COP(=S)(OC)OC1=CC=C(SC)C(C)=C1
55-38-9,WB,0.5,Tanichthys albonubes,FT,Cb/Cw,2.212187604,LogBCF (L/kg bdwt),FW,ArnotGobas,Relationships of Bioconcentration Factors of Organophosphate Pesticides Among Species of Fish,"Tsuda, T., M. Kojima, H. Harada, A. Nakajima, a S. Aoki",1997,Comp.Biochem.Physiol.C 116(3):213-218,COP(=S)(OC)OC1=CC=C(SC)C(C)=C1
55-38-9,WB,6,Oryzias latipes,FT,Cb/Cw,2.204119983,LogBCF (L/kg bdwt),FW,ArnotGobas,"Accumulation a Excretion of Fenthion, Fenthion Sulfoxide a Fenthion Sulfone by Killifish (Oryzias latipes)","Tsuda, T., M. Kojima, H. Harada, A. Nakajima, a S. Aoki",1996,Comp.Biochem.Physiol.C 113(1):45-49,COP(=S)(OC)OC1=CC=C(SC)C(C)=C1
55-38-9,WB,3,Tanichthys albonubes,FT,Cb/Cw,2.201397124,LogBCF (L/kg bdwt),FW,ArnotGobas,Relationships of Bioconcentration Factors of Organophosphate Pesticides Among Species of Fish,"Tsuda, T., M. Kojima, H. Harada, A. Nakajima, a S. Aoki",1997,Comp.Biochem.Physiol.C 116(3):213-218,COP(=S)(OC)OC1=CC=C(SC)C(C)=C1
55-38-9,WB,2,Oryzias latipes,FT,Cb/Cw,2.181843588,LogBCF (L/kg bdwt),FW,ArnotGobas,"Accumulation a Excretion of Fenthion, Fenthion Sulfoxide a Fenthion Sulfone by Killifish (Oryzias latipes)","Tsuda, T., M. Kojima, H. Harada, A. Nakajima, a S. Aoki",1996,Comp.Biochem.Physiol.C 113(1):45-49,COP(=S)(OC)OC1=CC=C(SC)C(C)=C1
55-38-9,WB,3,Oryzias latipes,FT,Cb/Cw,2.173186268,LogBCF (L/kg bdwt),FW,ArnotGobas,"Accumulation a Excretion of Fenthion, Fenthion Sulfoxide a Fenthion Sulfone by Killifish (Oryzias latipes)","Tsuda, T., M. Kojima, H. Harada, A. Nakajima, a S. Aoki",1996,Comp.Biochem.Physiol.C 113(1):45-49,COP(=S)(OC)OC1=CC=C(SC)C(C)=C1
55-38-9,WB,2,Oryzias latipes,FT,Cb/Cw,2.123851641,LogBCF (L/kg bdwt),FW,ArnotGobas,"Accumulation a Excretion of Fenthion, Fenthion Sulfoxide a Fenthion Sulfone by Killifish (Oryzias latipes)","Tsuda, T., M. Kojima, H. Harada, A. Nakajima, a S. Aoki",1996,Comp.Biochem.Physiol.C 113(1):45-49,COP(=S)(OC)OC1=CC=C(SC)C(C)=C1
55-38-9,WB,1,Oryzias latipes,FT,Cb/Cw,1.919078092,LogBCF (L/kg bdwt),FW,ArnotGobas,"Accumulation a Excretion of Fenthion, Fenthion Sulfoxide a Fenthion Sulfone by Killifish (Oryzias latipes)","Tsuda, T., M. Kojima, H. Harada, A. Nakajima, a S. Aoki",1996,Comp.Biochem.Physiol.C 113(1):45-49,COP(=S)(OC)OC1=CC=C(SC)C(C)=C1
55-38-9,WB,0.25,Tanichthys albonubes,FT,Cb/Cw,1.992553518,LogBCF (L/kg bdwt),FW,ArnotGobas,Relationships of Bioconcentration Factors of Organophosphate Pesticides Among Species of Fish,"Tsuda, T., M. Kojima, H. Harada, A. Nakajima, a S. Aoki",1997,Comp.Biochem.Physiol.C 116(3):213-218,COP(=S)(OC)OC1=CC=C(SC)C(C)=C1
55-38-9,WB,0.5,Oryzias latipes,FT,Cb/Cw,1.892094603,LogBCF (L/kg bdwt),FW,ArnotGobas,"Accumulation a Excretion of Fenthion, Fenthion Sulfoxide a Fenthion Sulfone by Killifish (Oryzias latipes)","Tsuda, T., M. Kojima, H. Harada, A. Nakajima, a S. Aoki",1996,Comp.Biochem.Physiol.C 113(1):45-49,COP(=S)(OC)OC1=CC=C(SC)C(C)=C1
55-38-9,WB,1,Oryzias latipes,FT,Cb/Cw,1.838849091,LogBCF (L/kg bdwt),FW,ArnotGobas,"Accumulation a Excretion of Fenthion, Fenthion Sulfoxide a Fenthion Sulfone by Killifish (Oryzias latipes)","Tsuda, T., M. Kojima, H. Harada, A. Nakajima, a S. Aoki",1996,Comp.Biochem.Physiol.C 113(1):45-49,COP(=S)(OC)OC1=CC=C(SC)C(C)=C1
55-38-9,WB,0.5,Oryzias latipes,FT,Cb/Cw,1.770852012,LogBCF (L/kg bdwt),FW,ArnotGobas,"Accumulation a Excretion of Fenthion, Fenthion Sulfoxide a Fenthion Sulfone by Killifish (Oryzias latipes)","Tsuda, T., M. Kojima, H. Harada, A. Nakajima, a S. Aoki",1996,Comp.Biochem.Physiol.C 113(1):45-49,COP(=S)(OC)OC1=CC=C(SC)C(C)=C1
55-38-9,WB,3,Cyprinus carpio,FT,Cb/Cw,1.462397998,LogBCF (L/kg bdwt),FW,ArnotGobas,Accumulation a Excretion of Organophosphorous Pesticides by Carp Cyprinus carpio,"Tsuda, T., S. Aoki, M. Kojima, a T. Fujita",1993,Comp.Biochem.Physiol.C 104(2):275-278,COP(=S)(OC)OC1=CC=C(SC)C(C)=C1
55-38-9,WB,5,Cyprinus carpio,FT,Cb/Cw,1.431363764,LogBCF (L/kg bdwt),FW,ArnotGobas,Accumulation a Excretion of Organophosphorous Pesticides by Carp Cyprinus carpio,"Tsuda, T., S. Aoki, M. Kojima, a T. Fujita",1993,Comp.Biochem.Physiol.C 104(2):275-278,COP(=S)(OC)OC1=CC=C(SC)C(C)=C1
55-38-9,WB,7.01,Cyprinus carpio,FT,Cb/Cw,1.414973348,LogBCF (L/kg bdwt),FW,ArnotGobas,Accumulation a Excretion of Organophosphorous Pesticides by Carp Cyprinus carpio,"Tsuda, T., S. Aoki, M. Kojima, a T. Fujita",1993,Comp.Biochem.Physiol.C 104(2):275-278,COP(=S)(OC)OC1=CC=C(SC)C(C)=C1
55-38-9,WB,1,Cyprinus carpio,FT,Cb/Cw,1.342422681,LogBCF (L/kg bdwt),FW,ArnotGobas,Accumulation a Excretion of Organophosphorous Pesticides by Carp Cyprinus carpio,"Tsuda, T., S. Aoki, M. Kojima, a T. Fujita",1993,Comp.Biochem.Physiol.C 104(2):275-278,COP(=S)(OC)OC1=CC=C(SC)C(C)=C1
55-38-9,WB,2,Oryzias latipes,FT,Cb/Cw,2.017033339,LogBCF (L/kg bdwt),FW,ArnotGobas,"Accumulation a Excretion of Diazinon, Fenthion a Fenitrothion by Killifish: Comparison of Iividual a Mixed Pesticides","Tsuda, T., S. Aoki, T. Inoue, a M. Kojima",1995,Water Res. 29(2):455-458,COP(=S)(OC)OC1=CC=C(SC)C(C)=C1
555-03-3,WB,42,Cyprinus carpio,FT,Cb/Cw,0.756803246,LogBCF (L/kg bdwt),,ArnotGobas,Biodegradation a Bioconcentration of Existing Chemical Substances uer the Chemical Substances Control Law,Chemicals Evaluation a Research Institute,1992,http://qsar.cerij.or.jp/cgi-bin/DEGACC/iex.cgie,COC1=CC=CC(=C1)[N+]([O-])=O
555-03-3,WB,42,Cyprinus carpio,FT,Cb/Cw,0.522745925,LogBCF (L/kg bdwt),,ArnotGobas,Biodegradation a Bioconcentration of Existing Chemical Substances uer the Chemical Substances Control Law,Chemicals Evaluation a Research Institute,1992,http://qsar.cerij.or.jp/cgi-bin/DEGACC/iex.cgie,COC1=CC=CC(=C1)[N+]([O-])=O
556-67-2,WB,7,Pimephales promelas,FT,Cb/Cw,4.036229544,LogBCF (L/kg bdwt),FW,ArnotGobas,Bioconcentration by Fish of a Highly Volatile Silicone Compou in a Totally Enclosed Aquatic Exposure System,"Fackler, P.H., E. Dionne, D.A. Hartley, a J.L. Hamelink",1995,Environ.Toxicol.Chem. 14(10):1649-1656,C[Si]1(C)O[Si](C)(C)O[Si](C)(C)O[Si](C)(C)O1
556-67-2,WB,28,Pimephales promelas,FT,Cb/Cw,4.15414998,LogBCF (L/kg bdwt),FW,ArnotGobas,Bioconcentration by Fish of a Highly Volatile Silicone Compou in a Totally Enclosed Aquatic Exposure System,"Fackler, P.H., E. Dionne, D.A. Hartley, a J.L. Hamelink",1995,Environ.Toxicol.Chem. 14(10):1649-1656,C[Si]1(C)O[Si](C)(C)O[Si](C)(C)O[Si](C)(C)O1
556-67-2,WB,22,Pimephales promelas,FT,Cb/Cw,4.126683263,LogBCF (L/kg bdwt),FW,ArnotGobas,Bioconcentration by Fish of a Highly Volatile Silicone Compou in a Totally Enclosed Aquatic Exposure System,"Fackler, P.H., E. Dionne, D.A. Hartley, a J.L. Hamelink",1995,Environ.Toxicol.Chem. 14(10):1649-1656,C[Si]1(C)O[Si](C)(C)O[Si](C)(C)O[Si](C)(C)O1
556-67-2,WB,10,Pimephales promelas,FT,Cb/Cw,4.077622229,LogBCF (L/kg bdwt),FW,ArnotGobas,Bioconcentration by Fish of a Highly Volatile Silicone Compou in a Totally Enclosed Aquatic Exposure System,"Fackler, P.H., E. Dionne, D.A. Hartley, a J.L. Hamelink",1995,Environ.Toxicol.Chem. 14(10):1649-1656,C[Si]1(C)O[Si](C)(C)O[Si](C)(C)O[Si](C)(C)O1
556-67-2,WB,14,Pimephales promelas,FT,Cb/Cw,4.074926097,LogBCF (L/kg bdwt),FW,ArnotGobas,Bioconcentration by Fish of a Highly Volatile Silicone Compou in a Totally Enclosed Aquatic Exposure System,"Fackler, P.H., E. Dionne, D.A. Hartley, a J.L. Hamelink",1995,Environ.Toxicol.Chem. 14(10):1649-1656,C[Si]1(C)O[Si](C)(C)O[Si](C)(C)O[Si](C)(C)O1
556-67-2,WB,18,Pimephales promelas,FT,Cb/Cw,4.041905639,LogBCF (L/kg bdwt),FW,ArnotGobas,Bioconcentration by Fish of a Highly Volatile Silicone Compou in a Totally Enclosed Aquatic Exposure System,"Fackler, P.H., E. Dionne, D.A. Hartley, a J.L. Hamelink",1995,Environ.Toxicol.Chem. 14(10):1649-1656,C[Si]1(C)O[Si](C)(C)O[Si](C)(C)O[Si](C)(C)O1
56113-42-9,WB,42,Cyprinus carpio,FT,Cb/Cw,0.49,LogBCF (L/kg bdwt),,ArnotGobas,Biodegradation a Bioconcentration of Existing Chemical Substances uer the Chemical Substances Control Law,Chemicals Evaluation a Research Institute,1992,http://qsar.cerij.or.jp/cgi-bin/DEGACC/iex.cgie,NC(=O)C1=C(Cl)C(Cl)=C(Cl)C(Cl)=C1C(O)=O
[truncated: 4,004,770 more chars]
